# Supplementary material for: C3-Functionalization of indoles with α-heteroaryl-substituted methyl alcohols
Source: Royal Society of Chemistry journal article supplement (doi:10.1039/d3ob01432k), 2023-01-01

## Supporting Information

### C3-Functionalization of indoles with $\alpha$ -heteroaryl-substituted methyl alcohols

Ethan J. Pazur,<sup>a</sup> Nikhil R. Tasker,<sup>a</sup> and Peter Wipf<sup>a\*</sup>

---

<sup>a</sup>Department of Chemistry, University of Pittsburgh, Pittsburgh PA 15260, USA.

### Table of Contents

|                                                                                          |     |
|------------------------------------------------------------------------------------------|-----|
| 1. General information.....                                                              | S2  |
| 2. Comparison of oxone® and air oxidation conditions.....                                | S2  |
| 3. Effects of indole substituent position on reaction rate and bis-indole formation..... | S3  |
| 4. DFT calculations of $\alpha$ -pyridyl methyl alcohol tautomers.....                   | S5  |
| 5. Synthesis and characterization of C3-substituted indoles.....                         | S6  |
| 6. Synthesis and characterization of putative intermediate <b>33</b> .....               | S16 |
| 7. Synthesis and characterization of URM-099.....                                        | S17 |
| 8. References.....                                                                       | S19 |
| 9. Spectral data.....                                                                    | S20 |

## 1. General information

Unless stated otherwise, all reactions were performed under an atmosphere of N<sub>2</sub> that was passed through a cartridge (10 x 2 cm) of Drierite<sup>®</sup>. Prior to use, Et<sub>2</sub>O and THF were freshly distilled over sodium/benzophenone ketyl radical anion, and CH<sub>2</sub>Cl<sub>2</sub> was freshly distilled over CaH<sub>2</sub>. DMSO, DMF, MeCN were freshly distilled over CaH<sub>2</sub> and stored over 3 Å molecular sieves. For water-sensitive reactions, glassware and stir bars were dried in an oven at 140 °C for at least 16 h prior to use. Reactions were monitored by <sup>1</sup>H-NMR and TLC analysis (pre-coated silica gel 60 F254). TLC spots were visualized by UV light (254 nm and 395 nm), KMnO<sub>4</sub> stain, or a DNP stain. All NMR spectra were recorded on Bruker Avance 300 MHz, Bruker Avance 400 MHz, or Bruker Avance 500 MHz instruments. High resolution mass spectra were obtained on a Micromass UK Limited, Q-TOF Ultima API or a Thermo Scientific Exactive Orbitrap LC-MS. Chemical shifts were reported in parts per million (ppm) with the residual solvent peak (CDCl<sub>3</sub>: 7.26 ppm for <sup>1</sup>H, 77.16 ppm for <sup>13</sup>C; DMSO: 2.50 ppm for <sup>1</sup>H, 39.52 ppm for <sup>13</sup>C; D<sub>2</sub>O: 4.79 ppm for <sup>1</sup>H) as the internal standard. Chemical shifts were tabulated as follows: chemical shift, multiplicity (s = singlet, d = doublet, t = triplet, q = quartet, dd = doublet of doublets, dt = doublet of triplets, td = triplet of doublets, brs = broad singlet, m = multiplet), coupling constant(s), and integration. IR spectra were obtained using neat samples on a PerkinElmer 100 IR-ATR spectrometer. Temperature was monitored with a Chemglass Life Sciences high temperature (-10–260 °C) or a low temperature (-100–50 °C) thermometer. Melting points were obtained using a Mel-Temp instrument and are uncorrected. Listed reaction concentrations refer to the indole component. The products were mostly air- and temperature-sensitive, making rigorous drying conditions difficult and leading, in some cases, to small residual solvent contamination.

## 2. Comparison of oxone<sup>®</sup> and air oxidation conditions

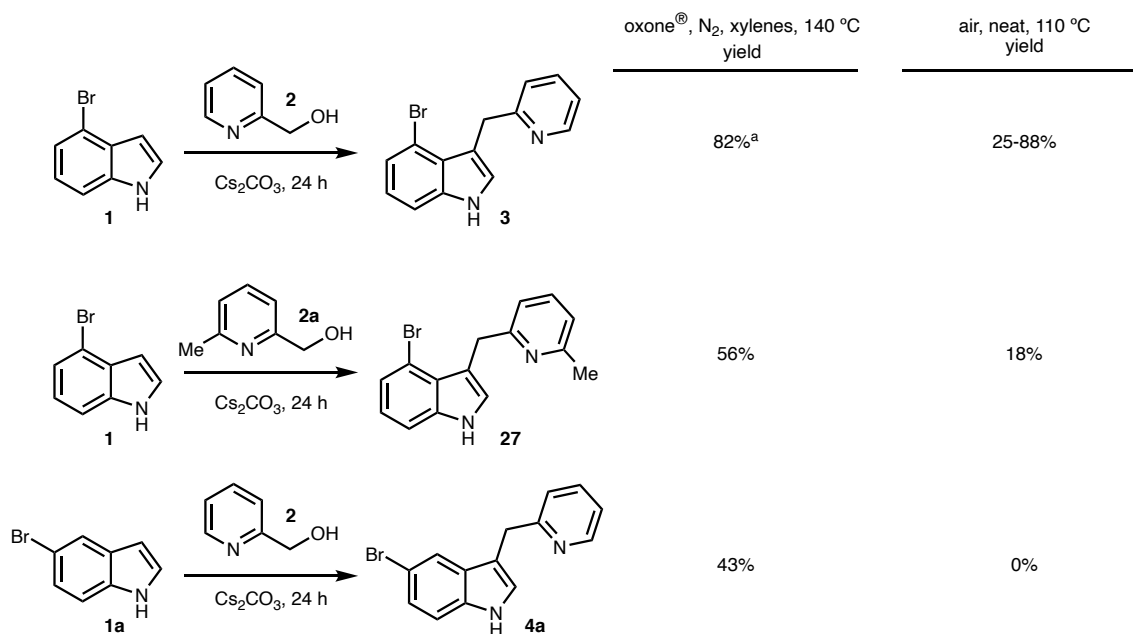

**Figure S1** Substrates were assessed in parallel under conditions utilizing oxone<sup>®</sup> versus air as the oxidant. Standard reaction conditions: 1 mmol scale, 3 equiv of **2/2a**, 1.1 equiv of Cs<sub>2</sub>CO<sub>3</sub>, and either: 0.1 equiv of oxone<sup>®</sup>, nitrogen atmosphere, concentration 2 M in xylenes, 140 °C, 24 h reaction time, or: air atmosphere, neat, 110 °C, 24 h reaction time. Yields are based on <sup>1</sup>H NMR analysis (CDCl<sub>3</sub>) in the presence of an internal standard (1,3,5-trimethoxybenzene). <sup>a</sup><sup>1</sup>H NMR analysis used DMSO-*d*<sub>6</sub> as solvent.

### 3. Effects of indole substituent position on reaction rate and bis-indole formation

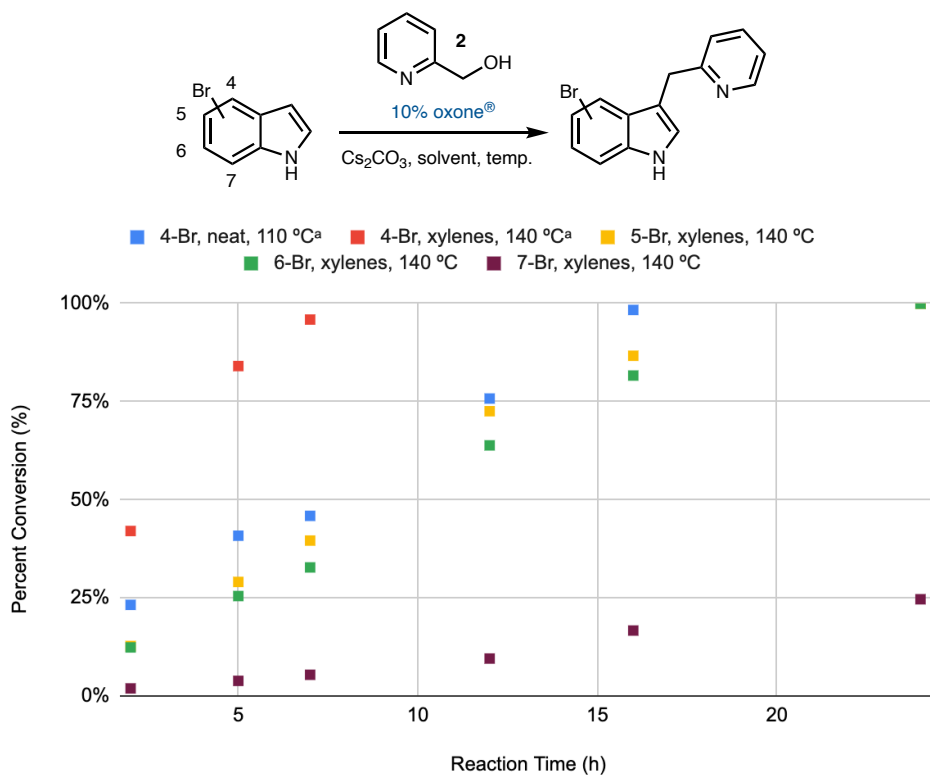

**Figure S2** Effects of indole substituent position on reaction rate. Standard reaction conditions: 1 mmol scale, 3 equiv of **2**, 1.1 equiv of Cs<sub>2</sub>CO<sub>3</sub>, 0.1 equiv of oxone<sup>®</sup> and either: neat, 110 °C, or: 2 M in xylenes, 140 °C. Percent conversion measured by <sup>1</sup>H NMR analysis (CDCl<sub>3</sub>). <sup>a</sup>Analysis by <sup>1</sup>H NMR analysis using DMSO-*d*<sub>6</sub> as solvent.

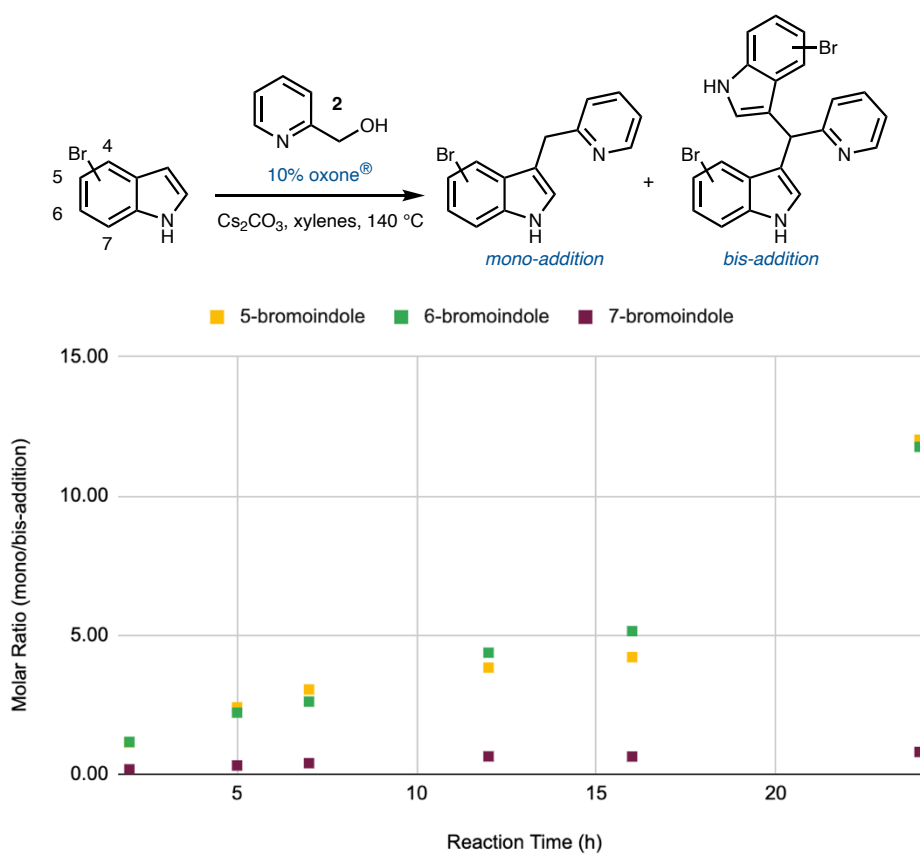

**Figure S3** Changes in molar ratio of mono/bis-addition products during the first 24 h reaction time. Standard reaction conditions: 1 mmol scale, 3 equiv of **2**, 1.1 equiv of Cs<sub>2</sub>CO<sub>3</sub>, 0.1 equiv of oxone<sup>®</sup>, concentration 2 M in xylenes, 140 °C. Molar ratio determined by <sup>1</sup>H NMR analysis (CDCl<sub>3</sub>).

4. DFT calculations of  $\alpha$ -pyridyl methyl alcohol tautomers

|                                                    |                                                                                   |                                                                                   |                                                                                   |                                                                                    |                                                                                     |                                                                                     |
|----------------------------------------------------|-----------------------------------------------------------------------------------|-----------------------------------------------------------------------------------|-----------------------------------------------------------------------------------|------------------------------------------------------------------------------------|-------------------------------------------------------------------------------------|-------------------------------------------------------------------------------------|
| substrate                                          | 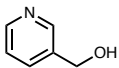 |  |  |  |  |  |
| lowest energy tautomer                             |  |  |  |  |  |  |
| relative DFT energy difference (kcal/mol) vs yield | +1.64<br>14% <sup>a</sup>                                                         | +1.12<br>< 5% <sup>b</sup>                                                        | 0<br>67%                                                                          | -0.51<br>60%                                                                       | -2.59<br>81%                                                                        | -7.54<br>51%                                                                        |

**Table S1** Lowest energy tautomers of pyridyl methyl alcohols and corresponding reference reaction yields. Relative energy gap differences between substrates and lowest energy tautomers were calculated as a function of 2-pyridinemethanol and its corresponding tautomer. Density Functional Theory (DFT) calculations were performed with a  $\omega$ B97X-D functional and 6-311+G\*\* basis set using Spartan v8.02 GUI. Standard reaction conditions: 1 mmol scale, 3 equiv of alcohol, 1.1 equiv of  $\text{Cs}_2\text{CO}_3$ , 0.1 equiv of oxone<sup>®</sup>, concentration 2 M in xylenes, 140 °C, 24 h. <sup>a</sup>Heated for 144 h. <sup>b</sup>Reaction performed using the following conditions: 1 mmol scale, 3 equiv of alcohol, 1.1 equiv of  $\text{Cs}_2\text{CO}_3$ , air, neat, 110 °C, 24 h.

Reference Reaction:

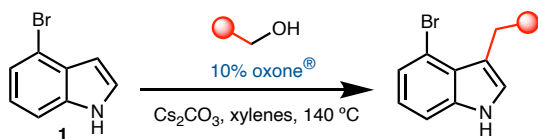

## 5. Synthesis and characterization of C3-substituted indoles

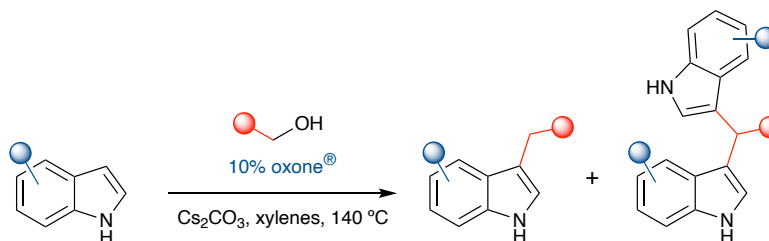

**General Procedure:** A mixture of indole (1 equiv), pyridyl alcohol (3.0 equiv),  $\text{Cs}_2\text{CO}_3$  (1.1 equiv), and oxone<sup>®</sup> (0.10 equiv) in xylenes (2 M) in a sealed vessel was stirred at 140 °C under an atmosphere of  $\text{N}_2$  until starting material was completely consumed by TLC analysis. The reaction mixture was cooled to room temperature, and  $\text{H}_2\text{O}$  (10 mL) was added. The aqueous layer was extracted with  $\text{CH}_2\text{Cl}_2/\text{MeOH}$  (9:1, 3 x 10 mL) and the combined organic layers were dried ( $\text{MgSO}_4$ ), filtered, and concentrated. The crude residue was purified by chromatography on  $\text{SiO}_2$  (35%  $\text{EtOAc}/\text{CH}_2\text{Cl}_2$ ) to afford product and bis-addition product.

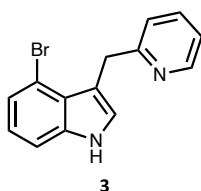

**4-Bromo-3-(pyridin-2-ylmethyl)-1H-indole (3).** Synthesized according to the general procedure utilizing 4-bromoindole (1.00 mL, 7.83 mmol) and 24 h reaction time; volumes of solvents used for extraction were scaled by 10 to give **3** (1.50 g, 5.22 mmol, 67%) as a tan solid: M.p. 185–186 °C; IR (ATR)  $\nu_{\text{max}}$  3112, 3021, 2917, 1725, 1596, 1559, 1543, 1473, 1434, 1424, 1409, 1331, 1249, 1174, 1042, 1002, 912, 843, 743, 717  $\text{cm}^{-1}$ ;  $^1\text{H}$  NMR (500 MHz,  $\text{DMSO}-d_6$ )  $\delta$  11.30 (brs, 1 H), 8.48 (ddd,  $J = 4.8, 1.7, 0.8$  Hz, 1 H), 7.63 (td,  $J = 7.7, 1.9$  Hz, 1 H), 7.40 (dd,  $J = 8.0, 0.5$  Hz, 1 H), 7.21 (d,  $J = 2.0$  Hz, 1 H), 7.18–7.15 (m, 1 H), 7.13 (dd,  $J = 7.8, 0.8$  Hz, 1 H), 7.02 (d,  $J = 7.8$  Hz, 1 H), 6.97 (t,  $J = 7.8$  Hz, 1 H), 4.44 (s, 2 H);  $^{13}\text{C}$  NMR (125 MHz,  $\text{DMSO}-d_6$ )  $\delta$  161.7, 148.7, 137.8, 136.3, 126.5, 124.8, 122.7, 122.3, 122.1, 120.9, 112.9, 112.1, 111.3, 34.3; HRMS (ESI+)  $m/z$  calcd for  $\text{C}_{14}\text{H}_{12}\text{N}_2\text{Br}$  ( $[\text{M}+\text{H}]^+$ ) 287.0178, found 287.0175.

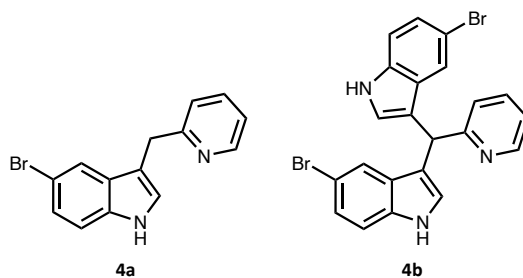

**5-Bromo-3-(pyridin-2-ylmethyl)-1H-indole (4a)** and **3,3'-(pyridin-2-ylmethylene)bis(5-bromo-1H-indole) (4b).** Synthesized according to the general procedure utilizing 5-bromoindole (0.200 g, 1.02 mmol) and 24 h reaction time to give **4a** (0.190 g, 0.663 mmol, 65%) and **4b** (0.0154 g, 0.0320 mmol, 6%) as tan solids. **4a:** M.p. 154.3 °C (dec.); IR (ATR)  $\nu_{\text{max}}$  3153, 2892, 1593, 1569, 1472, 1455, 1436, 1351, 1337, 1314, 1291, 1249, 1233, 1115, 1091, 1051, 1043, 1000, 879, 861, 792, 765, 776, 757, 719, 664  $\text{cm}^{-1}$ ;  $^1\text{H}$  NMR (300 MHz,  $\text{CDCl}_3$ )  $\delta$  8.57 (d,  $J = 4.2$  Hz, 1 H), 8.12 (brs, 1 H), 7.65 (s, 1 H), 7.57 (td,  $J = 7.7, 1.7$  Hz, 1 H), 7.28–7.23 (m, 2 H), 7.20–7.10 (m, 2 H), 7.08 (d,  $J = 2.1$  Hz, 1 H), 4.25 (s, 2 H);  $^{13}\text{C}$  NMR (75 MHz,  $\text{CDCl}_3$ )  $\delta$  160.8, 149.5, 136.7, 135.2, 129.4, 125.1, 124.0, 122.8, 121.9, 121.4, 113.9, 112.9, 112.7, 34.5; HRMS (ESI+)  $m/z$  calcd for  $\text{C}_{14}\text{H}_{12}\text{N}_2\text{Br}$  ( $[\text{M}+\text{H}]^+$ ) 287.0178, found 287.0187.

**4b**: M.p. 123.8 °C (dec.); IR (ATR)  $\nu_{\text{max}}$  3420, 3131, 2891, 1592, 1569, 1455, 1432, 1318, 1278, 1213, 1150, 1137, 1093, 1049, 1000, 883, 793, 768, 751, 686, 655  $\text{cm}^{-1}$ ;  $^1\text{H}$  NMR (300 MHz,  $\text{CDCl}_3$ )  $\delta$  8.57 (d,  $J = 4.0$  Hz, 1 H), 8.36 (brs, 2 H), 7.64 (td,  $J = 7.7, 1.7$  Hz, 1 H), 7.46 (d,  $J = 1.4$  Hz, 2 H), 7.28 (d,  $J = 7.7$  Hz, 1 H), 7.22–7.11 (m, 5 H), 6.65 (d,  $J = 1.7$  Hz, 2 H), 5.89 (s, 1 H);  $^{13}\text{C}$  NMR (75 MHz,  $\text{CDCl}_3$ )  $\delta$  162.7, 149.5, 137.1, 135.5, 128.7, 125.0, 124.9, 123.1, 122.2, 122.0, 117.5, 112.82, 112.77, 42.8; HRMS (ESI<sup>-</sup>)  $m/z$  calcd for  $\text{C}_{22}\text{H}_{14}\text{N}_3\text{Br}_2$  ( $[\text{M}-\text{H}]^-$ ) 477.9549, found 477.9565.

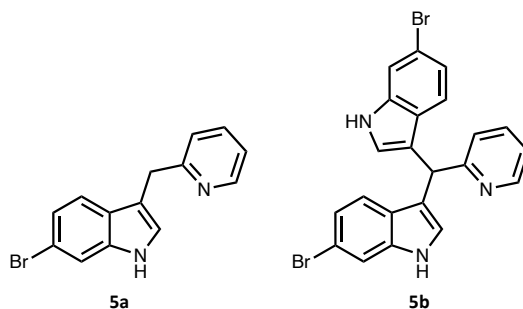

**6-Bromo-3-(pyridin-2-ylmethyl)-1H-indole (5a)** and **3,3'-(pyridin-2-ylmethylene)bis(6-bromo-1H-indole) (5b)**. Synthesized according to the general procedure utilizing 6-bromoindole (0.200 g, 1.00 mmol) and 24 h reaction time to give **5a** (0.205 g, 0.714 mmol, 71%) and **5b** (0.0230 g, 0.0478 mmol, 10%) as tan solids. **5a**: M.p. 152.5 °C (dec.); IR (ATR)  $\nu_{\text{max}}$  3010, 2880, 1594, 1567, 1473, 1455, 1435, 1411, 1346, 1324, 1251, 1233, 1136, 1118, 1091, 1067, 1048, 1004, 925, 893, 830, 807, 761, 750, 742, 719  $\text{cm}^{-1}$ ;  $^1\text{H}$  NMR (300 MHz,  $\text{CDCl}_3$ )  $\delta$  8.56 (d,  $J = 4.1$  Hz, 1 H), 8.14 (brs, 1 H), 7.55 (td,  $J = 7.7, 1.8$  Hz, 1 H), 7.49 (d,  $J = 1.7$  Hz, 1 H), 7.36 (d,  $J = 8.4$  Hz, 1 H), 7.18–7.09 (m, 3 H), 7.05–7.04 (m, 1 H), 4.27 (s, 2 H);  $^{13}\text{C}$  NMR (75 MHz,  $\text{CDCl}_3$ )  $\delta$  161.0, 149.4, 137.4, 136.7, 126.5, 123.3, 122.92, 122.85, 121.37, 120.6, 115.86, 114.4, 114.2, 34.6; HRMS (ESI<sup>+</sup>)  $m/z$  calcd for  $\text{C}_{14}\text{H}_{12}\text{N}_2\text{Br}$  ( $[\text{M}+\text{H}]^+$ ) 287.0178, found 287.0192.

**5b**: M.p. 128.0 °C (dec.); IR (ATR)  $\nu_{\text{max}}$  3424, 3134, 2929, 2879, 1615, 1592, 1570, 1539, 1470, 1453, 1433, 1398, 1332, 1219, 1134, 1096, 1050, 1040, 1000, 893, 848, 802, 771, 753, 686, 657  $\text{cm}^{-1}$ ;  $^1\text{H}$  NMR (400 MHz,  $\text{CDCl}_3$ )  $\delta$  8.58 (dd,  $J = 4.8, 0.8$  Hz, 1 H), 8.24 (brs, 2 H), 7.62 (td,  $J = 7.7, 1.8$  Hz, 1 H), 7.44 (d,  $J = 1.4$  Hz, 2 H), 7.27 (d,  $J = 8.3$  Hz, 1 H), 7.20–7.15 (m, 3 H), 7.08 (dd,  $J = 8.4, 1.6$  Hz, 2 H), 6.65 (d,  $J = 1.6$  Hz, 2 H), 5.95 (s, 1 H);  $^{13}\text{C}$  NMR (75 MHz,  $\text{CDCl}_3$ )  $\delta$  162.9, 149.5, 137.6, 137.0, 125.9, 124.2, 123.1, 122.8, 121.9, 121.0, 118.1, 115.7, 114.2, 42.9; HRMS (ESI<sup>-</sup>)  $m/z$  calcd for  $\text{C}_{22}\text{H}_{14}\text{N}_3\text{Br}_2$  ( $[\text{M}-\text{H}]^-$ ) 477.9549, found 477.9564.

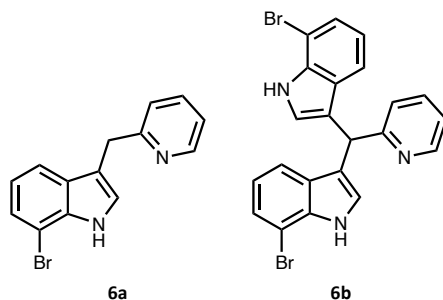

**7-Bromo-3-(pyridin-2-ylmethyl)-1H-indole (6a)** and **3,3'-(pyridin-2-ylmethylene)bis(7-bromo-1H-indole) (6b)**. Synthesized according to the general procedure utilizing 7-bromoindole (0.200 g, 1.01 mmol) and 96 h reaction time to give **6a** (0.175 g, 0.609 mmol, 60%) and **6b** (0.0139 g, 0.0289 mmol, 6%) as tan solids. **6a**: M.p. 131.0–132.2 °C; IR (ATR)  $\nu_{\text{max}}$  3090, 2907, 2841, 1646, 1568, 1594, 1495, 1481, 1432, 1356, 1338, 1309, 1285, 1249, 1194, 1149, 1118, 1092, 1059, 1048, 1003, 880, 887, 847, 790, 831, 772, 748, 727, 705  $\text{cm}^{-1}$ ;  $^1\text{H}$  NMR (400 MHz,  $\text{CDCl}_3$ )  $\delta$  8.56 (dd,  $J = 4.1, 0.8$  Hz, 1 H), 8.22 (brs, 1 H), 7.55 (td,  $J = 7.7, 1.8$  Hz, 1 H), 7.46 (d,  $J = 7.9$  Hz, 1 H), 7.33 (d,  $J = 7.3$  Hz, 1 H), 7.16–7.09 (m, 3 H), 6.95 (t,  $J = 7.8$  Hz, 1 H), 4.29 (s, 2 H);  $^{13}\text{C}$  NMR (100 MHz,  $\text{CDCl}_3$ )  $\delta$  160.9, 149.4, 136.6, 135.3, 128.8, 124.6, 123.3, 122.8, 121.4, 120.8, 118.7, 115.5, 104.9, 34.8; HRMS (ESI<sup>+</sup>) calcd  $m/z$  for  $\text{C}_{14}\text{H}_{12}\text{N}_2\text{Br}$  ( $[\text{M}+\text{H}]^+$ ) 287.0178, found 287.0170.

**6b**: M.p. 111.4 °C (dec.); IR (ATR)  $\nu_{\max}$  3676, 3419, 2971, 2901, 1591, 1568, 1488, 1470, 1432, 14051335, 1242, 1192, 1140, 1066, 1046, 880, 792, 777, 752, 732  $\text{cm}^{-1}$ ;  $^1\text{H}$  NMR (300 MHz,  $\text{CDCl}_3$ )  $\delta$  8.62 (dd,  $J = 4.9, 0.8$  Hz, 1 H), 8.21 (brs, 2 H), 7.60 (td,  $J = 7.7, 1.8$  Hz, 1 H), 7.33–7.26 (m, 5 H), 7.15 (ddd,  $J = 7.4, 4.9, 0.9$  Hz, 1 H), 6.89 (t,  $J = 7.8$  Hz, 2 H), 6.84 (d,  $J = 1.7$  Hz, 2 H), 6.00 (s, 1 H);  $^{13}\text{C}$  NMR (75 MHz,  $\text{CDCl}_3$ )  $\delta$  162.8, 149.7, 136.8, 135.45, 128.2, 124.6, 124.1, 122.9, 121.8, 120.8, 119.4, 119.1, 104.9, 43.5; HRMS (ESI<sup>+</sup>)  $m/z$  calcd for  $\text{C}_{22}\text{H}_{16}\text{N}_3\text{Br}_2$  ( $[\text{M}+\text{H}]^+$ ) 479.9706, found 479.9683.

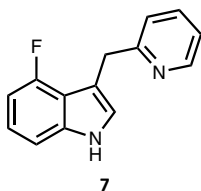

**4-Fluoro-3-(pyridin-2-ylmethyl)-1H-indole (7)**. Synthesized according to the general procedure utilizing 4-fluoroindole (0.168 g, 1.22 mmol) and 36 h reaction time to give **7** (0.248 g, 1.09 mmol, 90%) as a tan solid: M.p. 178.3 °C (dec.); IR (ATR)  $\nu_{\max}$  3117, 3071, 2927, 2877, 1881, 1634, 1595, 1581, 1510, 1456, 1437, 1411, 1350, 1228, 1032, 1002, 831, 780, 754, 733, 723, 658  $\text{cm}^{-1}$ ;  $^1\text{H}$  NMR (400 MHz,  $\text{CDCl}_3$ )  $\delta$  8.55 (dd,  $J = 4.8, 0.8$  Hz, 1 H) 8.20 (brs, 1 H), 7.57 (td,  $J = 7.7, 1.8$  Hz, 1 H), 7.24 (d,  $J = 7.9$  Hz, 1 H), 7.13–7.04 (m, 3 H), 6.99 (d,  $J = 1.7$  Hz, 1 H), 6.72 (ddd,  $J = 11.0, 7.6, 0.8$  Hz, 1 H), 4.39 (s, 2 H);  $^{13}\text{C}$  NMR (100 MHz,  $\text{CDCl}_3$ )  $\delta$  161.5, 158.7, 156.2, 149.3, 139.3 (d,  $J_{\text{C,F}} = 11.3$  Hz), 136.6, 123.0 (d,  $J_{\text{C,F}} = 3.2$  Hz), 122.7 (d,  $J_{\text{C,F}} = 7.9$  Hz), 122.1 (d,  $J_{\text{C,F}} = 117.2$  Hz), 116.4 (d,  $J_{\text{C,F}} = 20.9$  Hz), 112.8 (d,  $J_{\text{C,F}} = 2.4$  Hz), 107.4 (d,  $J_{\text{C,F}} = 3.6$  Hz), 104.8 (d,  $J_{\text{C,F}} = 19.2$  Hz), 34.4; HRMS (ESI<sup>+</sup>)  $m/z$  calcd for  $\text{C}_{14}\text{H}_{12}\text{N}_2\text{F}$  ( $[\text{M}+\text{H}]^+$ ) 227.0979, found 227.0984.

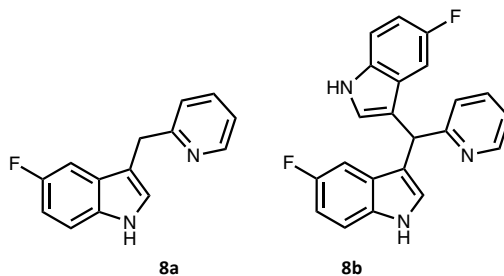

**5-Fluoro-3-(pyridin-2-ylmethyl)-1H-indole (8a)** and **3,3'-(pyridin-2-ylmethylene)bis(5-fluoro-1H-indole) (8b)**. Synthesized according to the general procedure utilizing 5-fluoroindole (0.150 g, 1.09 mmol) and 9 h reaction time to give **8a** (0.191 g, 0.845 mmol, 78%) and **8b** (0.0215 g, 0.0598 mmol, 11%) as tan solids. **8a**: M.p. 151.8 °C (dec.); IR (ATR)  $\nu_{\max}$  3134, 2893, 1569, 1595, 1489, 1466, 1438, 1410, 1340, 1304, 1246, 1234, 1193, 1167, 1050, 1002, 936, 925, 918, 852, 836, 792, 757, 709  $\text{cm}^{-1}$ ;  $^1\text{H}$  NMR (500 MHz,  $\text{CDCl}_3$ )  $\delta$  8.56 (dd,  $J = 4.8, 0.5$  Hz, 1 H) 8.24 (brs, 1 H), 7.56 (td,  $J = 7.7, 1.8$  Hz, 1 H), 7.24 (dd,  $J = 8.8, 4.4$  Hz, 1 H), 7.17–7.10 (m, 4 H), 6.91 (td,  $J = 9.1, 2.5$  Hz, 1 H), 4.25 (s, 2 H);  $^{13}\text{C}$  NMR (100 MHz,  $\text{CDCl}_3$ )  $\delta$  161.0, 159.1, 156.7, 149.4, 136.7, 133.1, 128.0 (d,  $J_{\text{C,F}} = 9.8$  Hz), 124.5, 122.1 (d,  $J_{\text{C,F}} = 148.9$  Hz), 114.3 (d,  $J_{\text{C,F}} = 4.5$  Hz), 111.8 (d,  $J_{\text{C,F}} = 9.7$  Hz) 110.6 (d,  $J_{\text{C,F}} = 26.2$  Hz), 104.3 (d,  $J_{\text{C,F}} = 23.2$  Hz), 34.7; HRMS (ESI<sup>+</sup>)  $m/z$  calcd for  $\text{C}_{14}\text{H}_{12}\text{N}_2\text{F}$  ( $[\text{M}+\text{H}]^+$ ) 227.0979, found 227.0973.

**8b**: M.p. 102.2 °C (dec.); IR (ATR)  $\nu_{\max}$  3462, 3136, 2919, 2335, 1628, 1584, 1484, 1453, 1435, 1349, 1161, 1092, 937, 845, 793, 750, 718, 667  $\text{cm}^{-1}$ ;  $^1\text{H}$  NMR (300 MHz,  $\text{CDCl}_3$ )  $\delta$  8.61 (dd,  $J = 4.8, 0.9$  Hz, 1 H) 8.09 (brs, 2 H), 7.61 (td,  $J = 7.7, 1.8$  Hz, 1 H), 7.29 (d,  $J = 7.9$  Hz, 1 H), 7.25 (d,  $J = 5.5$  Hz, 1 H), 7.22 (d,  $J = 4.4$  Hz, 1 H), 7.16 (ddd,  $J = 7.4, 4.9, 1.1$  Hz, 1 H), 7.00 (dd,  $J = 9.7, 2.4$  Hz, 2 H), 6.89 (td,  $J = 9.1, 2.5$  Hz, 2 H), 6.82 (d,  $J = 2.2$  Hz, 2 H), 5.90 (s, 1 H);  $^{13}\text{C}$  NMR (75 MHz,  $\text{CDCl}_3$ )  $\delta$  162.9, 159.3, 156.2, 149.7, 136.8, 133.3, 127.4 (d,  $J_{\text{C,F}} = 9.8$  Hz), 125.3, 122.4 (d,  $J_{\text{C,F}} = 90.5$  Hz), 118.2 (d,  $J_{\text{C,F}} = 4.7$  Hz), 111.9 (d,  $J_{\text{C,F}} = 9.7$  Hz), 110.6 (d,  $J_{\text{C,F}} = 26.3$  Hz), 104.8 (d,  $J_{\text{C,F}} = 23.5$  Hz), 43.2; HRMS (ESI<sup>+</sup>)  $m/z$  calcd for  $\text{C}_{22}\text{H}_{16}\text{N}_3\text{F}_2$  ( $[\text{M}+\text{H}]^+$ ) 360.1307, found 360.1288.



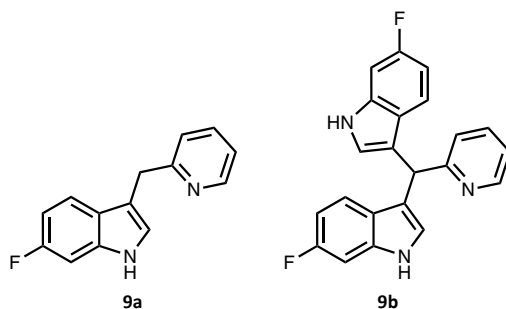

**6-Fluoro-3-(pyridin-2-ylmethyl)-1H-indole (9a)** and **3,3'-(pyridin-2-ylmethylene)bis(6-fluoro-1H-indole) (9b)**. Synthesized according to the general procedure utilizing 6-fluoroindole (0.150 g, 1.09 mmol) and 36 h reaction time to give **9a** (0.246 g, 0.682 mmol, 63%) and **9b** (0.0275 g, 0.0765 mmol, 14%) as tan solids. **9a**: M.p. 134.5–135.7 °C; IR (ATR)  $\nu_{\max}$  3151, 3092, 2993, 2913, 2837, 1835, 1625, 1596, 1569, 1559, 1477, 1457, 1435, 1344, 1307, 1227, 1141, 1099, 1051, 1002, 950, 833, 793, 801, 775, 757, 748, 727, 678  $\text{cm}^{-1}$ ;  $^1\text{H}$  NMR (400 MHz,  $\text{CDCl}_3$ )  $\delta$  8.56 (dd,  $J = 4.8, 0.8$  Hz, 1 H) 8.20 (brs, 1 H), 7.56 (td,  $J = 7.7, 1.8$  Hz, 1 H), 7.40 (dd,  $J = 8.7, 5.3$  Hz, 1 H), 7.16 (d,  $J = 7.8$  Hz, 1 H), 7.11 (dd,  $J = 7.4, 5.3$  Hz, 1 H), 7.03–7.00 (m, 2 H), 6.83 (tdd,  $J = 8.8, 2.3, 0.9$  Hz, 1 H), 4.28 (s, 2 H);  $^{13}\text{C}$  NMR (100 MHz,  $\text{CDCl}_3$ )  $\delta$  161.5, 161.2, 159.1, 149.4, 136.8, 136.6 (d,  $J_{\text{C,F}} = 12.4$  Hz), 124.3, 123.1 (d,  $J_{\text{C,F}} = 3.6$  Hz), 122.2 (d,  $J_{\text{C,F}} = 153.1$  Hz), 120.2 (d,  $J_{\text{C,F}} = 10.2$  Hz), 114.3, 108.5 (d,  $J_{\text{C,F}} = 24.2$  Hz), 97.6 (d,  $J_{\text{C,F}} = 26.0$  Hz), 34.7; HRMS (ESI<sup>+</sup>)  $m/z$  calcd for  $\text{C}_{14}\text{H}_{12}\text{N}_2\text{F}$  ( $[\text{M}+\text{H}]^+$ ) 227.0979, found 227.0984.

**9b**: M.p. 103.2 °C (dec.); IR (ATR)  $\nu_{\max}$  3416, 3154, 1626, 1591, 1497, 1455, 1434, 1343, 1306, 1252, 1213, 1139, 1118, 1091, 1001, 951, 834, 765, 800, 750, 714, 666  $\text{cm}^{-1}$ ;  $^1\text{H}$  NMR (400 MHz,  $\text{CDCl}_3$ )  $\delta$  8.61 (dd,  $J = 4.9, 0.9$  Hz, 1 H) 8.00 (brs, 2 H), 7.60 (td,  $J = 7.7, 1.8$  Hz, 1 H), 7.29–7.26 (m, 3 H), 7.15 (ddd,  $J = 7.4, 4.8, 0.9$  Hz, 1 H), 7.02 (dd,  $J = 9.6, 2.3$  Hz, 2 H), 6.79–6.74 (m, 4 H), 5.98 (s, 1 H);  $^{13}\text{C}$  NMR (100 MHz,  $\text{CDCl}_3$ )  $\delta$  163.2, 158.9 (d,  $J_{\text{C,F}} = 13.7$  Hz), 149.6, 136.75, 136.71 (d,  $J_{\text{C,F}} = 12.7$  Hz), 123.747 (d,  $J_{\text{C,F}} = 7.9$  Hz), 123.754, 122.3 (d,  $J_{\text{C,F}} = 122.9$  Hz), 120.6 (d,  $J_{\text{C,F}} = 9.9$  Hz), 118.4, 108.3 (d,  $J_{\text{C,F}} = 24.2$  Hz), 97.5 (d,  $J_{\text{C,F}} = 26.1$  Hz), 43.2; HRMS (ESI<sup>+</sup>)  $m/z$  calcd for  $\text{C}_{22}\text{H}_{16}\text{N}_3\text{F}_2$  ( $[\text{M}+\text{H}]^+$ ) 360.1307, found 360.1317.

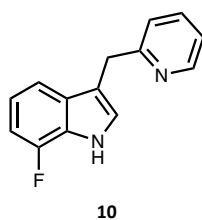

**7-Fluoro-3-(pyridin-2-ylmethyl)-1H-indole (10)**. Synthesized according to the general procedure utilizing 7-fluoroindole (0.150 g, 1.08 mmol) and 120 h reaction time to give **10** (0.158 g, 0.698 mmol, 65%) as a tan solid: M.p. 131.2–132.6 °C; IR (ATR)  $\nu_{\max}$  3078, 3022, 2848, 1719, 1632, 1595, 1578, 1569, 1504, 1481, 1462, 1434, 1353, 1287, 1228, 1219, 1148, 1089, 1049, 964, 828, 774, 749, 722, 708, 680  $\text{cm}^{-1}$ ;  $^1\text{H}$  NMR (400 MHz,  $\text{CDCl}_3$ )  $\delta$  8.57 (d,  $J = 4.5$  Hz, 1 H), 8.30 (brs, 1 H), 7.55 (t,  $J = 7.6$  Hz, 1 H), 7.27 (d,  $J = 8.5$  Hz, 1 H), 7.16–7.11 (m, 3 H), 7.00–6.95 (m, 1 H), 6.91–6.86 (m, 1 H), 4.29 (s, 2 H);  $^{13}\text{C}$  NMR (100 MHz,  $\text{CDCl}_3$ )  $\delta$  161.0, 150.9, 149.4, 148.5, 136.7, 131.3 (d,  $J_{\text{C,F}} = 5.1$  Hz), 124.9 (d,  $J_{\text{C,F}} = 13.4$  Hz), 123.1 (d,  $J_{\text{C,F}} = 56.1$  Hz), 121.3, 119.8 (d,  $J_{\text{C,F}} = 6.1$  Hz), 115.1 (d,  $J_{\text{C,F}} = 3.5$  Hz), 115.0 (d,  $J_{\text{C,F}} = 2.2$  Hz), 107.1 (d,  $J_{\text{C,F}} = 15.9$  Hz), 34.7; HRMS (ESI<sup>+</sup>)  $m/z$  calcd for  $\text{C}_{14}\text{H}_{12}\text{N}_2\text{F}$  ( $[\text{M}+\text{H}]^+$ ) 227.0979, found 227.0978.

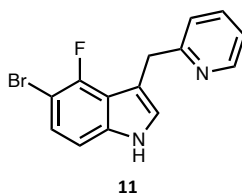

**5-Bromo-4-fluoro-3-(pyridin-2-ylmethyl)-1H-indole (11).** A mixture of 5-bromo-4-fluoroindole (0.200 g, 0.916 mmol), 2-pyridinemethanol (0.270 mL, 2.75 mmol),  $\text{Cs}_2\text{CO}_3$  (0.328 g, 1.00 mmol), and oxone<sup>®</sup> (0.0563 g, 0.0916 mmol) in xylenes (0.46 mL) in a sealed vessel was stirred at 110 °C under an atmosphere of  $\text{N}_2$  for 96 h. The reaction mixture was cooled to room temperature, and  $\text{H}_2\text{O}$  (10 mL) was added. The aqueous layer was extracted with  $\text{CH}_2\text{Cl}_2/\text{MeOH}$  (9:1, 3 x 10 mL), and the combined organic layers were dried ( $\text{MgSO}_4$ ), filtered, and concentrated. The crude residue was purified by chromatography on  $\text{SiO}_2$  (3%  $\text{MeOH}/\text{CH}_2\text{Cl}_2$ ) to afford **11** (0.122 g, 0.400 mmol, 44%) as a brown solid: M.p. 168.0 °C (dec.); IR (ATR)  $\nu_{\text{max}}$  3098, 3045, 2894, 2926, 2305, 1981, 1628, 1595, 1570, 1494, 1455, 1477, 1435, 1346, 1257, 1196, 1145, 1124, 1044, 1003, 850, 787, 748, 690  $\text{cm}^{-1}$ ;  $^1\text{H}$  NMR (300 MHz,  $\text{CDCl}_3$ )  $\delta$  8.55 (d,  $J = 4.3$  Hz, 1 H), 8.34 (brs, 1 H), 7.62 (td,  $J = 7.7, 1.8$  Hz, 1 H), 7.29–7.26 (m, 1 H), 7.22 (dd,  $J = 8.6, 6.5$  Hz, 1 H), 7.14 (dd,  $J = 7.2, 5.5$  Hz, 1 H), 7.04–6.98 (m, 2 H), 4.37 (s, 2 H);  $^{13}\text{C}$  NMR (100 MHz,  $\text{DMSO}-d_6$ )  $\delta$  161.0, 153.2, 150.7, 148.9, 138.3 (d,  $J_{\text{C,F}} = 11.5$  Hz), 136.5, 125.1 (d,  $J_{\text{C,F}} = 135.4$  Hz), 122.1, 121.2, 116.5 (d,  $J_{\text{C,F}} = 19.7$  Hz), 110.5 (d,  $J_{\text{C,F}} = 3.4$  Hz), 109.6 (d,  $J_{\text{C,F}} = 3.6$  Hz), 95.6 (d,  $J_{\text{C,F}} = 19.1$  Hz), 34.4; HRMS (ESI<sup>+</sup>)  $m/z$  calcd for  $\text{C}_{14}\text{H}_{11}\text{N}_2\text{BrF}$  ([M+H]<sup>+</sup>) 305.0084, found 305.0085.

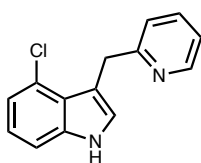

12

**4-Chloro-3-(pyridin-2-ylmethyl)-1H-indole (12).** Synthesized following the general procedure utilizing 4-chloroindole (0.160 g, 1.03 mmol) and 24 h reaction time; **12** (0.244 g, 1.00 mmol, 97%), light-tan solid: M.p. 181.4 °C (decomp); IR (ATR)  $\nu_{\text{max}}$  3081, 3008, 2917, 2859, 1893, 1685, 1597, 1567, 1547, 1474, 1449, 1435, 1409, 1333, 1300, 1275, 1243, 1177, 1092, 1072, 1044, 1003, 934, 922, 805, 781, 750, 734, 718  $\text{cm}^{-1}$ ;  $^1\text{H}$  NMR (300 MHz,  $\text{CDCl}_3$ )  $\delta$  8.57 (dd,  $J = 4.8, 0.75$  Hz, 1 H), 8.32 (brs, 1 H), 7.56 (td,  $J = 7.7, 1.8$  Hz, 1 H), 7.24 (dd,  $J = 6.5, 2.6$  Hz, 1 H), 7.16–7.03 (m, 4 H), 6.98 (d,  $J = 2.4$  Hz, 1 H), 4.57 (s, 2 H);  $^{13}\text{C}$  NMR (75 MHz,  $\text{CDCl}_3$ )  $\delta$  162.0, 149.2, 138.1, 136.6, 126.6, 124.7, 124.4, 123.1, 122.8, 121.1, 120.7, 114.1, 110.1, 35.3; HRMS (ESI<sup>+</sup>)  $m/z$  calcd for  $\text{C}_{14}\text{H}_{12}\text{N}_2\text{Cl}$  ([M+H]<sup>+</sup>) 243.0684, found 243.0678.

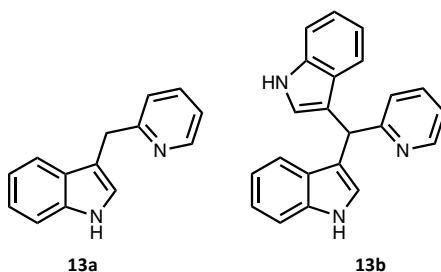

13a

13b

**3-(Pyridin-2-ylmethyl)-1H-indole (13a)** and **3,3'-(pyridin-2-ylmethylene)bis(1H-indole) (13b)**. Synthesized according to the general procedure utilizing indole (0.120 g, 1.01 mmol) and 24 h reaction time to give **13a** (0.169 g, 0.811 mmol, 80%) and **13b** (0.0123 g, 0.0380 mmol, 8%) as yellow solids. **13a**:  $^1\text{H}$  NMR (300 MHz,  $\text{CDCl}_3$ )  $\delta$  8.57 (dd,  $J = 4.9, 0.8$  Hz, 1 H), 8.23 (brs, 1 H), 7.56–7.51 (m, 2 H), 7.35 (d,  $J = 8.1$  Hz, 1 H), 7.21–7.16 (m, 2 H), 7.12–7.05 (m, 3 H), 4.32 (s, 2 H);  $^{13}\text{C}$  NMR (75 MHz,  $\text{CDCl}_3$ )  $\delta$  161.4, 149.2, 136.5, 127.6, 122.9, 122.8, 122.2, 121.2, 119.5, 119.3, 114.0, 111.3, 34.7; HRMS (ESI<sup>+</sup>)  $m/z$  calcd for  $\text{C}_{14}\text{H}_{13}\text{N}_2$  ([M+H]<sup>+</sup>) 209.1073, found 209.1067. Spectral data were consistent with previously reported properties.<sup>1</sup>

**13b**:  $^1\text{H}$  NMR (400 MHz,  $\text{CDCl}_3$ )  $\delta$  8.61 (d,  $J = 4.2$  Hz, 1 H), 8.01 (brs, 2 H), 7.59 (t,  $J = 7.4$  Hz, 1 H), 7.40 (d,  $J = 7.9$  Hz, 2 H), 7.36–7.32 (m, 3 H), 7.18–7.12 (m, 3 H), 7.00 (t,  $J = 7.4$  Hz, 2 H), 6.79 (s, 2 H), 6.07 (s, 1 H);  $^{13}\text{C}$  NMR (100 MHz,  $\text{CDCl}_3$ )  $\delta$  149.5, 136.8, 136.7, 127.2, 123.6, 123.1, 122.1, 121.5, 120.0, 119.4, 118.5, 111.2, 43.4. Spectral data were consistent with previously reported properties.<sup>2</sup>

**3-(Pyridin-2-ylmethyl)-1H-indole (13a).** Preparation from 2-aminophenylethyl alcohol: A mixture of 2-aminophenylethyl alcohol (0.200 mL, 1.52 mmol), 2-pyridinemethanol (0.450 mL, 4.57 mmol),  $\text{Cs}_2\text{CO}_3$  (0.546 g, 1.68 mmol) and oxone<sup>®</sup> (0.0937 g, 0.152

mmol) in xylenes (0.76 mL) in a sealed vessel was stirred at 140 °C under an atmosphere of N<sub>2</sub> for 264 h. The reaction mixture was cooled to room temperature, and H<sub>2</sub>O (10 mL) was added. The aqueous layer was extracted with CH<sub>2</sub>Cl<sub>2</sub>/MeOH (9:1, 3 x 10 mL), and the combined organic layers were dried (MgSO<sub>4</sub>), filtered, and concentrated. The crude residue was purified by chromatography on SiO<sub>2</sub> (35% EtOAc/CH<sub>2</sub>Cl<sub>2</sub>) to afford **13a** (0.0434 g, 0.208 mmol, 14%) as a brown solid.

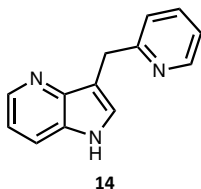

**3-(Pyridin-2-ylmethyl)-1H-pyrrolo[3,2-b]pyridine (14).** A mixture of 4-azaindole (0.120 g, 1.02 mmol), 2-pyridinemethanol (0.300 mL, 3.04 mmol), Cs<sub>2</sub>CO<sub>3</sub> (0.364 g, 1.12 mmol) and oxone® (0.0625 g, 0.102 mmol) in xylenes (0.5 mL) in a sealed vessel was stirred under an atmosphere of N<sub>2</sub> at 140 °C for 120 h. The reaction mixture was cooled to room temperature, and H<sub>2</sub>O/MeOH (1:1, 20 mL) was added. The aqueous layer was extracted with CH<sub>2</sub>Cl<sub>2</sub> (4 x 30 mL), and the combined organic layers were dried (MgSO<sub>4</sub>), filtered through a celite plug, and concentrated. The crude residue was purified by reverse-phase chromatography on C18-SiO<sub>2</sub> (30 g, 10% MeCN/H<sub>2</sub>O to 100% MeCN). Fractions containing the desired product were combined and extracted with CH<sub>2</sub>Cl<sub>2</sub>/MeOH (9:1, 3 x 30 mL). The combined organic extracts were dried (MgSO<sub>4</sub>), filtered, and concentrated to afford **14** (0.186 g, 0.889 mmol, 88%) as a yellow-tan solid: M.p. 157.9 °C (dec.); IR (ATR)  $\nu_{\text{max}}$  3045, 2891, 2851, 2818, 1714, 1590, 1568, 1505, 1473, 1439, 1410, 1368, 1301, 1292, 1218, 1109, 1098, 1086, 894, 810, 783, 772, 761, 750, 717, 648, 624 cm<sup>-1</sup>; <sup>1</sup>H NMR (300 MHz, DMSO-*d*<sub>6</sub>)  $\delta$  11.11 (brs, 1 H), 8.46 (dd, *J* = 4.8, 0.9 Hz, 1 H), 8.29 (dd, *J* = 4.6, 1.4 Hz, 1 H), 7.72 (dd, *J* = 8.1, 1.4 Hz, 1 H), 7.62 (td, *J* = 7.7, 1.8 Hz, 1 H), 7.45 (d, *J* = 2.6 Hz, 1 H), 7.28 (d, *J* = 7.8 Hz, 1 H), 7.16 (ddd, *J* = 7.3, 4.9, 0.8 Hz, 1 H), 7.08 (dd, *J* = 8.2, 4.6 Hz, 1 H), 4.24 (s, 2 H); <sup>13</sup>C NMR (75 MHz, DMSO-*d*<sub>6</sub>)  $\delta$  161.2, 148.7, 144.8, 141.8, 136.3, 128.6, 127.2, 122.6, 121.0, 118.3, 116.2, 112.7, 32.5; HRMS (ESI<sup>+</sup>) *m/z* calcd for C<sub>13</sub>H<sub>12</sub>N<sub>3</sub> ([M+H]<sup>+</sup>) 210.1031, found 210.1025.

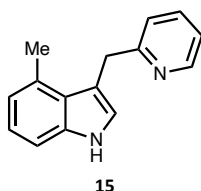

**4-Methyl-3-(pyridin-2-ylmethyl)-1H-indole (15).** Synthesized according to the general procedure utilizing 4-methylindole (0.130 mL, 1.01 mmol) and 14 h reaction time to give **15** (0.214 g, 0.963 mmol, 95%) as a light-tan solid: M.p. 159.1 °C (dec.); IR (ATR)  $\nu_{\text{max}}$  3148, 3112, 2997, 2938, 1680, 1594, 1568, 1472, 1436, 1412, 1345, 1299, 1245, 1153, 1065, 841, 752, 740, 721, 661 cm<sup>-1</sup>; <sup>1</sup>H NMR (400 MHz, CDCl<sub>3</sub>)  $\delta$  8.58 (dd, *J* = 4.8, 0.7 Hz, 1 H), 8.15 (brs, 1 H), 7.52 (td, *J* = 7.7, 1.8 Hz, 1 H), 7.21 (d, *J* = 8.1 Hz, 1 H), 7.12–7.02 (m, 3H), 6.97 (d, *J* = 2.3 Hz, 1 H), 6.81 (d, *J* = 7.1 Hz, 1 H), 4.48 (s, 2 H), 2.48 (s, 3 H); <sup>13</sup>C NMR (100 MHz, CDCl<sub>3</sub>)  $\delta$  162.4, 149.2, 137.2, 136.6, 131.2, 126.2, 123.6, 122.8, 122.4, 121.2, 121.1, 114.2, 109.2, 36.3, 20.2; HRMS (ESI<sup>+</sup>) *m/z* calcd for C<sub>15</sub>H<sub>15</sub>N<sub>2</sub> ([M+H]<sup>+</sup>) 223.1230, found 223.1240.

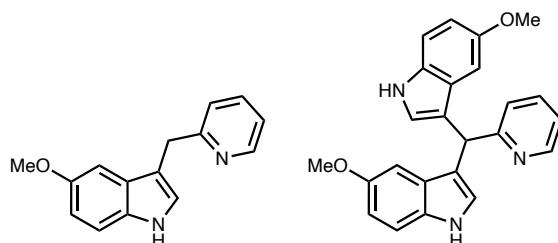

16a

16b

**5-Methoxy-3-(pyridin-2-ylmethyl)-1H-indole (16a)** and **3,3'-(pyridin-2-ylmethylene)bis(5-methoxy-1H-indole) (16b)**.

Synthesized according to the general procedure utilizing 5-methoxyindole (0.150 g, 1.02 mmol) and 24 h reaction time to give **16a** (0.197 g, 0.826 mmol, 81%) and **16b** (0.0159 g, 0.0415 mmol, 8%) as tan solids. **16b**: M.p. 109.6–110.7 °C; IR (ATR)  $\nu_{\text{max}}$  3036, 2998, 2878, 2824, 1625, 1595, 1583, 1569, 1488, 1474, 1436, 1411, 1303, 1256, 1236, 1217, 1172, 1109, 1029, 1003, 914, 829, 795, 759, 708  $\text{cm}^{-1}$ ;  $^1\text{H}$  NMR (400 MHz,  $\text{CDCl}_3$ )  $\delta$  8.57 (d,  $J = 4.2$  Hz, 1 H), 8.00 (brs, 1 H), 7.54 (td,  $J = 7.7, 1.8$  Hz, 1 H), 7.25 (d,  $J = 9.3$  Hz, 1 H), 7.16 (d,  $J = 7.8$  Hz, 1 H), 7.10 (dd,  $J = 5.3, 1.6$  Hz, 1 H), 7.06 (d,  $J = 2.0$  Hz, 1 H), 6.95 (d,  $J = 2.3$  Hz, 1 H), 6.84 (dd,  $J = 8.8, 2.4$  Hz, 1 H), 4.28 (s, 2 H), 3.79 (s, 3 H);  $^{13}\text{C}$  NMR (100 MHz,  $\text{CDCl}_3$ )  $\delta$  161.4, 154.2, 149.2, 136.6, 131.7, 128.0, 123.6, 122.9, 121.2, 113.8, 112.4, 111.9, 101.2, 56.0, 34.7; HRMS (ESI<sup>+</sup>)  $m/z$  calcd for  $\text{C}_{15}\text{H}_{15}\text{ON}_2$  ( $[\text{M}+\text{H}]^+$ ) 239.1179, found 239.1184.

**16b**: M.p. 91.3 °C (dec.); IR (ATR)  $\nu_{\text{max}}$  3401, 2931, 1624, 1587, 1483, 1435, 1292, 1210, 1171, 1093, 1042, 926, 830, 795, 753, 715, 671  $\text{cm}^{-1}$ ;  $^1\text{H}$  NMR (400 MHz,  $\text{CDCl}_3$ )  $\delta$  8.60 (d,  $J = 4.0$  Hz, 1 H), 8.03 (brs, 2 H), 7.58 (td,  $J = 7.7, 1.8$  Hz, 1 H), 7.30 (d,  $J = 7.8$  Hz, 1 H), 7.22–7.19 (m, 2 H), 7.13 (dd,  $J = 6.6, 5.1$  Hz, 1 H), 6.83–6.80 (m, 4 H), 6.72 (d,  $J = 2.0$  Hz, 2 H), 5.96 (s, 1 H), 3.69 (s, 6 H);  $^{13}\text{C}$  NMR (100 MHz,  $\text{CDCl}_3$ )  $\delta$  163.7, 153.9, 149.4, 136.7, 132.0, 127.6, 124.5, 123.1, 121.5, 118.0, 112.2, 111.9, 101.8, 56.0, 43.3; HRMS (ESI<sup>+</sup>)  $m/z$  calcd for  $\text{C}_{24}\text{H}_{22}\text{O}_2\text{N}_3$  ( $[\text{M}+\text{H}]^+$ ) 384.1707, found 384.1713.

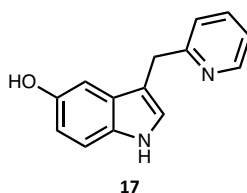

**3-(Pyridin-2-ylmethyl)-1H-indol-5-ol (17)**. A mixture of 5-hydroxyindole (0.150 g, 1.10 mmol), 2-pyridinemethanol (0.326 mL, 3.31 mmol),  $\text{Cs}_2\text{CO}_3$  (0.755 g, 2.32 mmol) and oxone® (0.0679 g, 0.110 mmol) in xylenes (0.55 mL) was stirred in a sealed vessel under an atmosphere of  $\text{N}_2$  at 140 °C for 36 h. The reaction mixture was cooled to room temperature, and  $\text{H}_2\text{O}/\text{MeOH}$  (1:1, 20 mL) was added. The aqueous layer was extracted with  $\text{CH}_2\text{Cl}_2$  (4 x 30 mL), and the combined organic layers were dried ( $\text{MgSO}_4$ ), filtered, and concentrated. The crude residue was dissolved in 5%  $\text{MeOH}/\text{CH}_2\text{Cl}_2$  (3 mL) and loaded onto a  $\text{SiO}_2$  column. The column was washed with  $\text{CH}_2\text{Cl}_2$  (20 mL) and then the mixture was eluted with 100%  $\text{EtOAc}$  to afford **17** (0.188 g, 0.838 mmol, 76%) as a light-brown solid: M.p. 63.5 °C (dec.); IR (ATR)  $\nu_{\text{max}}$  3285, 3050, 2854, 2607, 1837, 1595, 1583, 1570, 1469, 1436, 1403, 1310, 1197, 1092, 1051, 1009, 937, 831, 794, 784, 774, 749, 696, 667  $\text{cm}^{-1}$ ;  $^1\text{H}$  NMR (500 MHz,  $\text{DMSO}-d_6$ )  $\delta$  10.55 (brs, 1 H), 8.53 (brs, 1 H), 8.47 (ddd,  $J = 4.7, 1.7, 1.1$  Hz, 1 H), 7.63 (td,  $J = 7.7, 1.8$  Hz, 1 H), 7.18–7.15 (m, 2 H), 7.12–7.10 (m, 2 H), 6.72 (d,  $J = 2.3$  Hz, 1 H), 6.56 (dd,  $J = 8.6, 2.3$  Hz, 1 H), 4.07 (s, 2 H);  $^{13}\text{C}$  NMR (100 MHz,  $\text{DMSO}-d_6$ )  $\delta$  161.4, 150.2, 148.7, 136.3, 130.9, 127.7, 123.9, 122.4, 121.0, 111.7, 111.34, 111.28, 102.6, 34.2; HRMS (ESI<sup>+</sup>)  $m/z$  calcd for  $\text{C}_{14}\text{H}_{13}\text{ON}_2$  ( $[\text{M}+\text{H}]^+$ ) 225.1022, found 225.1021.

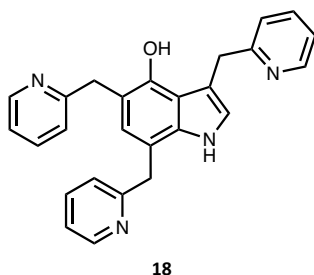

**3,5,7-Tris(pyridin-2-ylmethyl)-1H-indol-4-ol (18)**. A mixture of 4-hydroxyindole (0.150 g, 1.12 mmol), 2-pyridinemethanol (0.329 mL, 3.35 mmol),  $\text{Cs}_2\text{CO}_3$  (0.763 g, 2.34 mmol) and oxone® (0.0686 g, 0.112 mmol) in xylenes (0.56 mL) in a sealed vessel was stirred at 140 °C under an atmosphere of  $\text{N}_2$  for 24 h. The reaction mixture was cooled to room temperature, and  $\text{H}_2\text{O}/\text{MeOH}$  (1:1, 20 mL) was added. The aqueous layer was extracted with  $\text{CH}_2\text{Cl}_2$  (4 x 30 mL), and the combined organic layers were dried ( $\text{MgSO}_4$ ), filtered, and concentrated. The crude residue was purified by chromatography on  $\text{SiO}_2$  (3%  $\text{MeOH}/\text{CH}_2\text{Cl}_2$ ) to afford **18**

(0.248 g, 0.610 mmol, 55%) as a reddish-brown solid: M.p. 70.6 °C (dec.); IR (ATR)  $\nu_{\max}$  3007, 2901, 2573, 1591, 1568, 1494, 1473, 1433, 1354, 1317, 1256, 1223, 1148, 1092, 1050, 1012, 995, 935, 748, 706, 658  $\text{cm}^{-1}$ ;  $^1\text{H}$  NMR (400 MHz, DMSO- $d_6$ )  $\delta$  11.81 (brs, 1 H), 10.66 (brs, 1 H), 8.45–8.43 (m, 3 H), 7.81 (td,  $J$  = 7.6, 1.6 Hz, 1 H), 7.65 (td,  $J$  = 7.7, 1.7 Hz, 1 H), 7.60 (td,  $J$  = 7.7, 1.8 Hz, 1 H), 7.45 (d,  $J$  = 7.8 Hz, 1 H), 7.27 (dd,  $J$  = 6.7, 5.2 Hz, 1 H), 7.22 (d,  $J$  = 7.8 Hz, 1 H), 7.18–7.12 (m, 3 H), 7.06 (d,  $J$  = 2.1 Hz, 1 H), 6.71 (s, 1 H), 4.26 (s, 2 H), 4.13 (s, 2 H), 4.09 (s, 2 H);  $^{13}\text{C}$  NMR (100 MHz, DMSO- $d_6$ )  $\delta$  162.2, 161.4, 160.6, 148.8, 148.3, 147.7, 147.1, 138.5, 136.6, 136.54, 136.51, 125.0, 123.3, 122.6, 122.5, 122.3, 121.7, 121.1, 121.0, 117.8, 115.3, 114.2, 111.7, 39.0, 38.5, 34.3; HRMS (ESI $^+$ )  $m/z$  calcd for  $\text{C}_{26}\text{H}_{23}\text{ON}_4$  ([M+H] $^+$ ) 407.1866, found 407.1861.

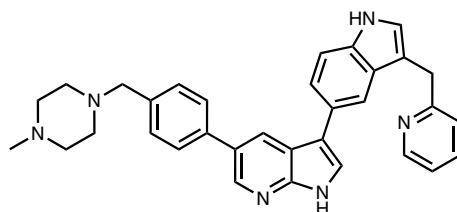

19

**5-(4-((4-Methylpiperazin-1-yl)methyl)phenyl)-3-(3-(pyridin-2-ylmethyl)-1H-indol-5-yl)-1H-pyrrolo[2,3-b]pyridine (19).** A mixture of URM-099 (0.100 g, 0.237 mmol), 2-pyridinemethanol (0.0701 mL, 0.712 mmol),  $\text{Cs}_2\text{CO}_3$  (0.162 g, 0.498 mmol) and oxone $^{\text{®}}$  (0.0146 g, 0.0237 mmol) in xylenes (0.24 mL) in a sealed vessel was stirred at 140 °C under an atmosphere of  $\text{N}_2$  for 24 h. The reaction mixture was cooled to room temperature and MeOH (5 mL) was added. The suspension was sonicated in a warm water bath at 50 °C for 30 min. The supernatant was pipetted into a round-bottom flask containing 1.0 g of celite. The residual grey solid in the reaction vessel was extracted with MeOH (3 x 5 mL) and the combined organic extracts were added to the MeOH/celite suspension. Separately, a short silica plug was washed with MeOH (100 mL). The celite suspension was concentrated in vacuo and the celite was added on top of the washed silica plug. The plug was washed with MeOH (100 mL), and the yellow filtrate was discarded. The plug was then washed with additional MeOH (500 mL), and the colorless filtrate was collected, concentrated, and dried in vacuo to afford **19** (0.106 g, 0.206 mmol, 87%) as a light-tan solid: M.p. 138.2 °C (dec.); IR (ATR)  $\nu_{\max}$  3400, 3126, 3021, 2928, 2801, 1592, 1568, 1472, 1456, 1435, 1418, 1370, 1349, 1292, 1250, 1161, 1139, 1103, 1050, 1008, 912, 885, 802, 777, 748  $\text{cm}^{-1}$ ;  $^1\text{H}$  NMR (500 MHz, DMSO- $d_6$ )  $\delta$  11.81 (brs, 1 H), 10.90 (brs, 1 H), 8.52 (d,  $J$  = 2.0 Hz, 1 H), 8.33 (bd,  $J$  = 3.9 Hz, 1 H), 8.25 (d,  $J$  = 2.0 Hz, 1 H), 7.79 (s, 1 H), 7.71 (s, 1 H), 7.64 (d,  $J$  = 8.1 Hz, 2 H), 7.57 (td,  $J$  = 7.6, 1.6 Hz, 1 H), 7.44–7.41 (m, 4 H), 7.30 (d,  $J$  = 7.9 Hz, 1 H), 7.27 (s, 1 H), 7.03 (dd,  $J$  = 6.6, 4.8 Hz, 1 H), 4.22 (s, 2 H), 3.52 (s, 2 H), 2.47–2.21 (m, 8 H), 2.15 (s, 3 H);  $^{13}\text{C}$  NMR (125 MHz, DMSO- $d_6$ )  $\delta$  161.4, 148.6, 148.5, 141.7, 137.9, 137.0, 136.3, 135.2, 129.5, 128.4, 127.6, 126.9, 125.2, 125.1, 123.8, 123.3, 122.6, 121.0, 120.8, 117.7, 116.6, 116.4, 112.6, 111.9, 61.7, 54.8, 52.6, 45.7, 34.3; HRMS (ESI $^+$ )  $m/z$  calcd for  $\text{C}_{33}\text{H}_{33}\text{N}_6$  ([M+H] $^+$ ) 513.2761, found 513.2761.

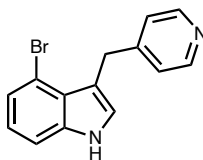

25

**4-Bromo-3-(pyridin-4-ylmethyl)-1H-indole (25).** Synthesized according to the general procedure utilizing 4-bromoindole (0.150 mL, 1.17 mmol), 4-pyridinemethanol (0.388 g, 3.52 mmol), a 24 h reaction time, and 3% MeOH/ $\text{CH}_2\text{Cl}_2$  as eluent for purification by chromatography on  $\text{SiO}_2$  gave **25** (0.273 g, 0.951 mmol, 81%) as a tan solid: M.p. 184–186 °C; IR (ATR)  $\nu_{\max}$  3072, 3021, 2919, 2857, 1684, 1604, 1558, 1542, 1495, 1417, 1331, 1260, 1121, 1088, 1064, 1040, 1005, 806, 774, 747, 730  $\text{cm}^{-1}$ ;  $^1\text{H}$  NMR (500 MHz,  $\text{CDCl}_3$ )  $\delta$  8.49 (dd,  $J$  = 4.5, 1.5 Hz, 2 H), 8.38 (brs, 1 H), 7.33 (dd,  $J$  = 8.5, 1.0 Hz, 1 H), 7.27 (dd,  $J$  = 0.5 Hz, 1 H), 7.16 (d,  $J$  = 6.0 Hz, 2 H), 7.03 (t,  $J$  = 8.0 Hz, 1 H), 6.93 (d,  $J$  = 2.0 Hz, 1 H), 4.42 (s, 2 H);  $^{13}\text{C}$  NMR (125 MHz,  $\text{CDCl}_3$ )  $\delta$  151.6, 149.6, 138.0, 125.5, 125.0, 124.4, 124.2, 123.3, 114.3, 114.0, 110.9, 31.9; HRMS (ESI $^+$ )  $m/z$  calcd for  $\text{C}_{13}\text{H}_{11}\text{BrN}_2$  ([M+H] $^+$ ) 287.0184, found 287.0157.

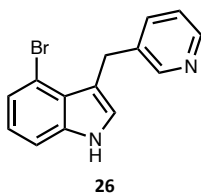

**4-Bromo-3-(pyridin-3-ylmethyl)-1H-indole (26).** Synthesized according to the general procedure utilizing 4-bromoindole (0.150 mL, 1.17 mmol), 3-pyridinemethanol (0.343 mL, 3.52 mmol), a 144 h reaction time, and 3% MeOH/CH<sub>2</sub>Cl<sub>2</sub> as eluent for purification by chromatography on SiO<sub>2</sub> gave **26** (0.0472 g, 0.164 mmol, 14%) as a tan solid: M.p. 171.3–173.0 °C; IR (ATR)  $\nu_{\text{max}}$  3056, 2850, 2342, 2102, 1578, 1561, 1478, 1427, 1419, 1337, 1306, 1290, 1198, 1163, 1100, 1071, 1043, 1030, 916, 801, 773, 750, 728, 709, 657, 635 cm<sup>-1</sup>; <sup>1</sup>H NMR (400 MHz, DMSO-*d*<sub>6</sub>)  $\delta$  11.32 (brs, 1 H), 8.45 (d, *J* = 1.6 Hz, 1 H), 8.37 (dd, *J* = 4.7, 1.4 Hz, 1 H), 7.53 (dt, *J* = 7.8, 1.7 Hz, 1 H), 7.39 (dd, *J* = 8.1, 0.7 Hz, 1 H), 7.27 (dd, *J* = 7.5, 4.5 Hz, 1 H), 7.22 (d, *J* = 2.4 Hz, 1 H), 7.14 (dd, *J* = 7.5, 0.7 Hz, 1 H), 6.98 (t, *J* = 7.8 Hz, 1 H), 4.32 (s, 2 H); <sup>13</sup>C NMR (100 MHz, CDCl<sub>3</sub>)  $\delta$  150.4, 147.4, 137.9, 137.3, 136.5, 125.4, 124.8, 124.2, 123.4, 123.3, 115.5, 114.4, 110.8, 29.9; HRMS (ESI<sup>+</sup>) *m/z* calcd for C<sub>14</sub>H<sub>12</sub>N<sub>2</sub>Br ([M+H]<sup>+</sup>) 287.0184, found 287.0179.

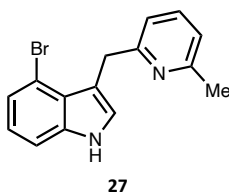

**4-Bromo-3-((6-methylpyridin-2-yl)methyl)-1H-indole (27).** Synthesized according to the general procedure utilizing 4-bromoindole (0.150 mL, 1.17 mmol), 6-methyl-2-pyridinemethanol (0.442 g, 3.52 mmol), a 24 h reaction time, and 20% EtOAc/CH<sub>2</sub>Cl<sub>2</sub> as eluent for purification by chromatography on SiO<sub>2</sub> gave **27** (0.212 g, 0.704 mmol, 60%) as a tan solid: M.p. 165–167 °C; IR (ATR)  $\nu_{\text{max}}$  3121, 2916, 1675, 1597, 1577, 1459, 1408, 1334, 1290, 1251, 1195, 1170, 1155, 1113, 1096, 1069, 1044, 993, 915 cm<sup>-1</sup>; <sup>1</sup>H NMR (500 MHz, CDCl<sub>3</sub>)  $\delta$  8.17 (brs, 1 H), 7.44 (t, *J* = 8.0 Hz, 1 H), 7.31 (d, *J* = 8.0 Hz, 1 H), 7.50 (overlap with CDCl<sub>3</sub> residual solvent peak, 1 H), 7.01 (t, *J* = 8.0 Hz, 1 H), 6.97 (d, *J* = 7.5 Hz, 1 H), 6.95 (d, *J* = 2.5 Hz, 1 H), 6.86 (d, *J* = 7.5 Hz, 1 H), 4.58 (s, 2 H), 2.58 (s, 3 H); <sup>13</sup>C NMR (125 MHz, CDCl<sub>3</sub>)  $\delta$  161.4, 157.7, 137.8, 136.8, 125.9, 125.0, 124.1, 123.0, 120.6, 120.1, 114.8, 114.6, 110.6, 35.3, 24.7; HRMS (ESI<sup>+</sup>) *m/z* calcd for C<sub>15</sub>H<sub>14</sub>N<sub>2</sub>Br ([M+H]<sup>+</sup>) 301.0335, found 301.0327.

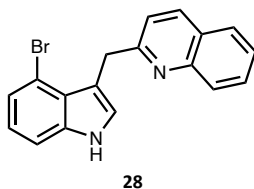

**2-((4-Bromo-1H-indol-3-yl)methyl)quinoline (28).** Synthesized according to the general procedure utilizing 4-bromoindole (0.150 mL, 1.17 mmol), 2-quinolinylmethanol (0.561 g, 3.52 mmol), a 24 h reaction time, and 15% EtOAc/CH<sub>2</sub>Cl<sub>2</sub> as eluent for purification by chromatography on SiO<sub>2</sub> gave **28** (0.203 g, 0.602 mmol, 51%) as an orange-tan solid: M.p. 185–187 °C; IR (ATR)  $\nu_{\text{max}}$  3149, 1617, 1598, 1561, 1505, 1423, 1411, 1334, 1249, 1217, 1200, 1173, 1141, 1114, 1075, 1044, 955, 909 cm<sup>-1</sup>; <sup>1</sup>H NMR (500 MHz, CDCl<sub>3</sub>)  $\delta$  8.18 (brs, 1 H), 8.09 (d, *J* = 8.5 Hz, 1 H), 8.03 (d, *J* = 8.5 Hz, 1 H), 7.78 (d, *J* = 8.0 Hz, 1 H), 7.70 (td, *J* = 7.0, 1.0 Hz, 1 H), 7.50 (td, *J* = 8.0, 1.0 Hz, 1 H), 7.32 (t, *J* = 8.0 Hz, 1 H), 7.28 (dd, *J* = 7.5, 0.5 Hz, 1 H), 7.03 (t, *J* = 8.0 Hz, 1 H), 6.95 (d, *J* = 2.0 Hz, 1 H), 4.82 (s, 2 H); <sup>13</sup>C NMR (125 MHz, CDCl<sub>3</sub>)  $\delta$  162.4, 147.8, 137.9, 136.7, 129.6, 128.8, 127.7, 127.0, 126.0, 125.7, 125.3, 124.2, 123.1, 121.9, 114.5, 114.3, 110.8, 35.9; HRMS (ESI<sup>+</sup>) *m/z* calcd for C<sub>18</sub>H<sub>14</sub>N<sub>2</sub>Br ([M+H]<sup>+</sup>) 337.0328, found 337.0335.

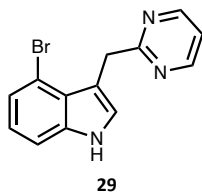

**4-Bromo-3-(pyrimidin-2-ylmethyl)-1H-indole (29).** A mixture of 4-bromoindole (0.150 mL, 1.17 mmol), 2-pyrimidinemethanol (0.396 g, 3.52 mmol), Cs<sub>2</sub>CO<sub>3</sub> (0.421 g, 1.29 mmol) and oxone® (0.0721 g, 0.117 mmol) in xylenes (0.59 mL) in a sealed vessel was stirred at 140 °C under an atmosphere of N<sub>2</sub> for 96 h. The reaction mixture was cooled to room temperature, and additional xylenes (0.50 mL) was added. After another 48 h at 140 °C, the solution was cooled to room temperature and H<sub>2</sub>O/MeOH (1:1, 20 mL) was added. The aqueous layer was extracted with CH<sub>2</sub>Cl<sub>2</sub> (4 x 30 mL), and the combined organic layers were dried (MgSO<sub>4</sub>), filtered through a celite plug, and concentrated. The crude residue was purified by reverse-phase chromatography on C18 SiO<sub>2</sub> (30 g, 10% MeCN/H<sub>2</sub>O to 100% MeCN). Fractions containing the desired product were combined and extracted with CH<sub>2</sub>Cl<sub>2</sub>/MeOH (9:1, 3 x 30 mL). The combined organic extracts were dried (MgSO<sub>4</sub>), filtered, and concentrated to afford **29** (0.177 g, 0.614 mmol, 52%) as a brown solid: M.p. 196.8 °C (dec.); IR (ATR)  $\nu_{\max}$  3156, 2914, 2329, 1573, 1559, 1487, 1422, 1403, 1329, 1226, 1200, 1171, 1140, 1118, 1073, 1042, 912, 815, 802, 762, 726, 638 cm<sup>-1</sup>; <sup>1</sup>H NMR (400 MHz, DMSO-*d*<sub>6</sub>)  $\delta$  11.24 (brs, 1 H), 8.69 (d, *J* = 4.9 Hz, 2 H), 7.38 (d, *J* = 7.2 Hz, 1 H), 7.30 (t, *J* = 4.8 Hz, 1 H), 7.20 (d, *J* = 2.1 Hz, 1 H), 7.10 (d, *J* = 7.5 Hz, 1 H), 6.95 (t, *J* = 7.8 Hz, 1 H), 4.58 (s, 2 H); <sup>13</sup>C NMR (100 MHz, DMSO-*d*<sub>6</sub>)  $\delta$  170.0, 157.1, 137.7, 126.4, 125.2, 122.5, 122.0, 118.8, 113.0, 111.3, 111.2, 35.8; HRMS (ESI<sup>+</sup>) *m/z* calcd for C<sub>13</sub>H<sub>11</sub>N<sub>3</sub>Br ([M+H]<sup>+</sup>) 288.0136, found 288.0130.

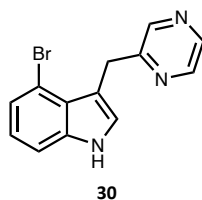

**4-Bromo-3-(pyrazin-2-ylmethyl)-1H-indole (30).** A mixture of 4-bromoindole (0.150 mL, 1.17 mmol), pyrazin-2-ylmethanol (0.315 mL, 3.52 mmol), Cs<sub>2</sub>CO<sub>3</sub> (0.421 g, 1.29 mmol) and oxone® (0.0721 g, 0.117 mmol) in xylenes (0.59 mL) was stirred at 140 °C in a sealed vessel under an atmosphere of N<sub>2</sub> for 24 h. The reaction mixture was cooled to room temperature and H<sub>2</sub>O (10 mL) was added. The aqueous layer was extracted with CH<sub>2</sub>Cl<sub>2</sub>/MeOH (9:1, 3 x 10 mL) and the combined organic layers were dried (MgSO<sub>4</sub>), filtered through a celite plug, and concentrated. The crude residue was purified by reverse-phase chromatography on C18 SiO<sub>2</sub> (30 g, 10% MeCN/H<sub>2</sub>O to 100% MeCN). Fractions containing the desired product were combined and diluted with brine (10 mL). The aqueous layer was extracted with CH<sub>2</sub>Cl<sub>2</sub>/MeOH (9:1, 3 x 30 mL) and the combined organic extracts were dried (MgSO<sub>4</sub>), filtered, and concentrated to afford **30** (0.298 g, 1.03 mmol, 88%) as an orange-brown solid: M.p. 148.0–149.3 °C; IR (ATR)  $\nu_{\max}$  3191, 3039, 2903, 1615, 1548, 1531, 1489, 1477, 1439, 1403, 1333, 1300, 1283, 1250, 1205, 1176, 1133, 1111, 1074, 1057, 1043, 1025, 944, 913, 831, 802, 773, 757, 739, 731, 666 cm<sup>-1</sup>; <sup>1</sup>H NMR (300 MHz, DMSO-*d*<sub>6</sub>)  $\delta$  11.37 (brs, 1 H), 8.55 (dd, *J* = 2.5, 1.6 Hz, 1 H), 8.44 (d, *J* = 2.5 Hz, 1 H), 8.38 (d, *J* = 1.3 Hz, 1 H), 7.41 (dd, *J* = 8.1, 0.7 Hz, 1 H), 7.28 (d, *J* = 2.5 Hz, 1 H), 7.14 (dd, *J* = 7.5, 0.7 Hz, 1 H), 6.98 (t, *J* = 7.8 Hz, 1 H), 4.50 (s, 2 H); <sup>13</sup>C NMR (75 MHz, DMSO-*d*<sub>6</sub>)  $\delta$  157.1, 144.2, 143.8, 142.0, 137.8, 126.8, 124.7, 122.7, 122.3, 112.7, 111.4, 110.9, 31.8; HRMS (ESI<sup>+</sup>) *m/z* calcd for C<sub>13</sub>H<sub>11</sub>N<sub>3</sub>Br ([M+H]<sup>+</sup>) 288.0131, found 288.0124.

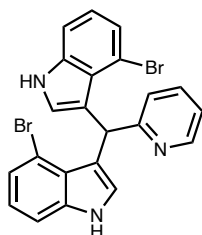

**3,3'-(Pyridin-2-ylmethylene)bis(4-bromo-1H-indole) (32).** A mixture of 4-bromoindole (0.100 mL, 0.783 mmol), 2-pyridinemethanol (0.227 mL, 2.35 mmol) and Cs<sub>2</sub>CO<sub>3</sub> (0.281 g, 0.861 mmol) was stirred at 110 °C in a sealed vessel under an atmosphere of O<sub>2</sub> for 24 h. The reaction mixture was cooled to room temperature, and H<sub>2</sub>O (10 mL) and CH<sub>2</sub>Cl<sub>2</sub>/MeOH (9:1, 20 mL) were added. The phases were separated, and the aqueous layer was extracted with CH<sub>2</sub>Cl<sub>2</sub> (2 x 10 mL). The combined organic layers were washed with brine (30 mL), dried (MgSO<sub>4</sub>), filtered, and concentrated. The crude residue was triturated with CH<sub>2</sub>Cl<sub>2</sub> and filtered off. The filtrate was concentrated, and the residue was purified by chromatography on SiO<sub>2</sub> (35% EtOAc/CH<sub>2</sub>Cl<sub>2</sub>). The triturated solid was combined with the purified filtrate and dried in vacuo to afford **32** (0.131 g, 0.260 mmol, 70%) as a light-tan solid: M.p. >250 °C; IR (ATR)  $\nu_{max}$  3433, 3116, 1593, 1570, 1472, 1432, 1416, 1333, 1283, 1181, 1141, 1093, 1034, 1004 cm<sup>-1</sup>; <sup>1</sup>H NMR (300 MHz, DMSO-*d*<sub>6</sub>)  $\delta$  11.17 (d, *J* = 1.8 Hz, 2 H), 8.49 (d, *J* = 4.5 Hz, 1 H), 7.66 (td, *J* = 6.0, 1.5 Hz, 1 H), 7.39 (d, *J* = 7.5 Hz, 2 H), 7.21–7.17 (m, 2 H), 7.09 (d, *J* = 6.9 Hz, 2 H), 7.03 (d, *J* = 7.8 Hz, 1 H), 6.96 (t, *J* = 7.8 Hz, 2 H), 6.54 (d, *J* = 2.1 Hz, 2 H); <sup>13</sup>C NMR (75 MHz, DMSO-*d*<sub>6</sub>)  $\delta$  164.7, 148.9, 138.1, 136.2, 126.7, 124.0, 122.8, 122.7, 122.0, 121.0, 118.6, 113.1, 111.3; HRMS (ESI<sup>+</sup>) *m/z* calcd for C<sub>22</sub>H<sub>16</sub>N<sub>3</sub>Br<sub>2</sub> ([M+H]<sup>+</sup>) 479.9706, found 479.9710.

## 6. Synthesis and characterization of putative intermediate 33

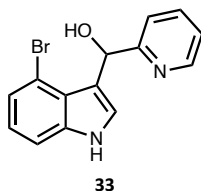

**(4-Bromo-1H-indol-3-yl)(pyridin-2-yl)methanol (33).** To a solution of 4-bromoindole (0.128 mL, 1.00 mmol) and tetramethylguanidine (0.00775 g, 0.0667 mmol) in H<sub>2</sub>O (1.7 mL) was added 2-pyridinemethanol (0.0320 mL, 0.333 mmol). The solution was stirred at room temperature for 24 h before it was diluted with EtOAc (10 mL). The layers were separated, and the aqueous layer was extracted with EtOAc (2 x 10 mL). The combined organic layers were treated with Et<sub>3</sub>N (0.5 mL), dried (MgSO<sub>4</sub>), filtered, and concentrated. The crude residue was purified by chromatography on SiO<sub>2</sub> (60% EtOAc/CH<sub>2</sub>Cl<sub>2</sub>) to afford **40** (0.0510 g, 0.168 mmol, 50%) as a tan solid: M.p. 132–134 °C; IR (ATR)  $\nu_{max}$  3159, 1592, 1571, 1425, 1339, 1184, 1145, 1096, 1066, 1044, 1017, 996 cm<sup>-1</sup>; <sup>1</sup>H NMR (500 MHz, CDCl<sub>3</sub>)  $\delta$  8.59 (d, *J* = 4.5 Hz, 1 H), 8.49 (brs, 1 H), 7.64 (td, *J* = 7.5, 1.5 Hz, 1 H), 7.36 (d, *J* = 8.0 Hz, 1 H), 7.32 (d, *J* = 7.5 Hz, 1 H), 7.30 (d, *J* = 8.0 Hz, 1 H), 7.22 (dd, *J* = 7.8, 5.8 Hz, 1 H), 7.02 (app t, *J* = 8.0 Hz, 1 H), 6.93 (d, *J* = 2.5 Hz, 1 H), 6.77 (s, 1 H); <sup>13</sup>C NMR (125 MHz, CDCl<sub>3</sub>)  $\delta$  161.9, 148.0, 137.8, 136.9, 125.2, 124.8, 123.2, 122.4, 122.0, 119.7, 113.8, 110.9, 67.8; HRMS (ESI<sup>+</sup>) *m/z* calcd for C<sub>14</sub>H<sub>12</sub>O<sub>2</sub>N<sub>2</sub>Br ([M+H]<sup>+</sup>) 303.0128; found 303.0119.



## 7. Synthesis and characterization of URMC-099

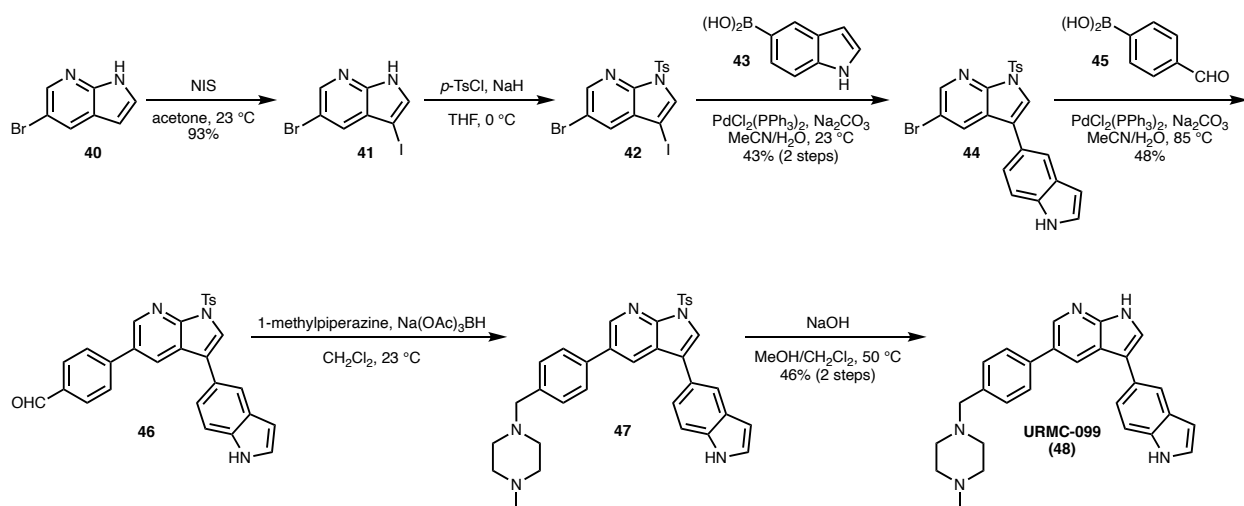Scheme S1 Synthesis of URMC-099 (**48**) according to a literature protocol.<sup>3</sup>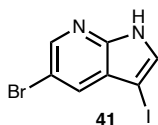

**5-Bromo-3-iodo-1H-pyrrolo[2,3-b]pyridine (41).** To a solution of 5-bromo-7-azaindole (5.00 g, 24.9 mmol) in acetone (124 mL) at room temperature was added *N*-iodosuccinimide (6.15 g, 27.4 mmol). The solution was stirred at room temperature for 1.5 h before being cooled to 0 °C. The resulting precipitate was filtered off and collected. The filtrate was concentrated in vacuo and redissolved in acetone (50 mL). The solution was cooled to 0 °C and the resulting precipitate was filtered off and collected. The combined crops of precipitate were dried in vacuo to afford **41** (7.47 g, 23.1 mmol, 93%) as a pink solid: <sup>1</sup>H NMR (500 MHz, DMSO-*d*<sub>6</sub>) δ 12.35 (brs, 1 H), 8.31 (d, *J* = 2.5 Hz, 1 H), 7.86 (d, *J* = 2.0 Hz, 1 H), 7.80 (d, *J* = 2.5 Hz, 1 H). Spectral data were consistent with previously reported properties.<sup>3</sup>

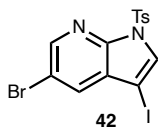

**5-Bromo-3-iodo-1-tosyl-1H-pyrrolo[2,3-b]pyridine (42).** To a stirred suspension of NaH (1.39 g, 34.7 mmol, 60% in mineral oil) in THF (116 mL) at 0 °C was added portionwise **41** (7.47 g, 23.1 mmol). After 20 min, *p*-TsCl (4.95, 25.4 mmol) was added portionwise. The solution was stirred at 0 °C for 2 h and then quenched with saturated aqueous NH<sub>4</sub>Cl (100 mL). The solution was extracted with CH<sub>2</sub>Cl<sub>2</sub> (3 x 100 mL), and the combined organic layers were washed with brine (50 mL), dried (MgSO<sub>4</sub>), filtered, and concentrated to afford **42** (11.0, 23.1 mmol) as a pinkish-white solid. The material was used for the next step without additional purification.

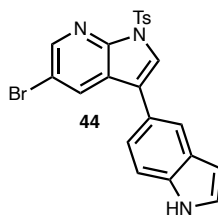

**5-Bromo-3-(1H-indol-5-yl)-1-tosyl-1H-pyrrolo[2,3-b]pyridine (44).** To a mixture of **42** (11.0 g, 23.1 mmol), indole-5-boronic acid (**43**, 4.17 g, 25.4 mmol), and MeCN (115 mL) at room temperature was added aqueous Na<sub>2</sub>CO<sub>3</sub> (1 M, 58 mL) followed by bis(triphenylphosphine)palladium(II) chloride (1.62 g, 2.31 mmol). The reaction mixture was stirred under an atmosphere of N<sub>2</sub> at room temperature for 6 h, treated with EtOAc (200 mL) and quenched with H<sub>2</sub>O (100 mL). The layers were separated, and the aqueous layer was extracted with EtOAc (2 x 200 mL). The combined organic extracts were washed with brine (50 mL), dried (MgSO<sub>4</sub>), filtered, and concentrated. The crude residue was purified by chromatography on SiO<sub>2</sub> (CH<sub>2</sub>Cl<sub>2</sub>) to afford **44** (4.61 g, 9.89 mmol, 43% over two steps) as a light-brown foam which was gently crushed into a fine powder with a spatula: <sup>1</sup>H NMR (400 MHz, CDCl<sub>3</sub>) δ 8.49 (d, *J* = 2.0 Hz, 1 H), 8.26 (d, *J* = 2.0 Hz, 2 H), 8.08 (d, *J* = 8.4 Hz, 2 H), 7.85 (s, 1 H), 7.81 (brs, 1 H), 7.51 (d, *J* = 8.4 Hz, 1 H), 7.36 (dd, *J* = 8.4, 1.4 Hz, 1 H), 7.30–7.28 (m, 3 H), 6.63 (brs, 1 H), 2.39 (s, 3 H). Spectral data were consistent with previously reported properties.<sup>3</sup>

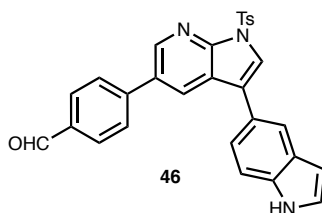

**4-(3-(1H-indol-5-yl)-1-tosyl-1H-pyrrolo[2,3-b]pyridin-5-yl)benzaldehyde (46).** To a mixture of **44** (2.50 g, 5.36 mmol) and 4-formylphenylboronic acid (**45**, 0.964 g, 6.43 mmol) in MeCN (27 mL) was added aqueous Na<sub>2</sub>CO<sub>3</sub> (1 M, 13 mL) at room temperature followed by bis(triphenylphosphine)palladium(II) chloride (0.376 g, 0.536 mmol). The reaction mixture was stirred in a sealed vessel under an atmosphere of N<sub>2</sub> at 85 °C for 4 h, cooled to room temperature, and treated with saturated aqueous NH<sub>4</sub>Cl (50 mL). The solution was extracted with CH<sub>2</sub>Cl<sub>2</sub> (3 x 50 mL), and the combined organic extracts were dried (MgSO<sub>4</sub>), filtered, and concentrated. The crude residue was purified by chromatography on SiO<sub>2</sub> (5% EtOAc/CH<sub>2</sub>Cl<sub>2</sub>) to afford **46** (1.27 g, 2.58 mmol, 48%) as a yellow-tan solid: <sup>1</sup>H NMR (300 MHz, CDCl<sub>3</sub>) δ 10.07 (s, 1 H), 8.73 (d, *J* = 2.1 Hz, 1 H), 8.34 (d, *J* = 2.2 Hz, 1 H), 8.30 (d, *J* = 2.0 Hz, 1 H), 8.16 (d, *J* = 8.4 Hz, 2 H), 7.98 (d, *J* = 8.3 Hz, 2 H), 7.91 (s, 1 H), 7.88 (brs, 1 H), 7.75 (d, *J* = 8.2 Hz, 2 H), 7.53 (d, *J* = 8.4 Hz, 1 H), 7.43 (dd, *J* = 8.4, 1.6 Hz, 1 H), 7.33–7.29 (m, 3 H), 6.64–6.63 (m, 1 H), 2.39 (s, 3 H). Spectral data were consistent with previously reported properties.<sup>3</sup>

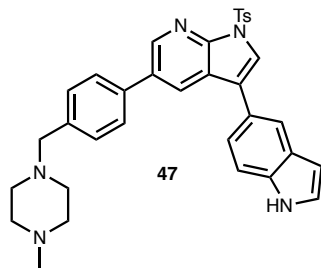

**3-(1H-indol-5-yl)-5-(4-((4-methylpiperazin-1-yl)methyl)phenyl)-1-tosyl-1H-pyrrolo[2,3-b]pyridine (47).** To a solution of **46** (1.27 g, 2.58 mmol) in CH<sub>2</sub>Cl<sub>2</sub> (26 mL) at room temperature was added 1-methylpiperazine (1.16 mL, 10.3 mmol). After 15 min, sodium

triacetoxyborohydride (0.847 g, 3.87 mmol) was added portionwise. The solution was stirred at room temperature for 1 h before brine (20 mL) was added. The layers were separated, and the aqueous layer was extracted with CH<sub>2</sub>Cl<sub>2</sub>/MeOH (9:1, 2 x 20 mL). The combined organic extracts were dried (MgSO<sub>4</sub>), filtered, and concentrated to afford **47** (1.49 g, 2.58 mmol) as a brown solid. The material was used for the next step without additional purification.

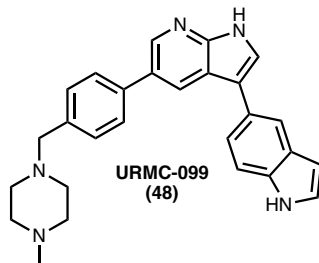

**3-(1H-Indol-5-yl)-5-(4-((4-methylpiperazin-1-yl)methyl)phenyl)-1H-pyrrolo[2,3-b]pyridine (URMC-099, 48).** To a solution of **47** (1.49 g, 2.58 mmol) in MeOH/CH<sub>2</sub>Cl<sub>2</sub> (3:1, 9 mL) at room temperature was added NaOH (0.310 g, 7.75 mmol). The solution was stirred in a sealed vessel at 50 °C for 2 h, cooled to room temperature and treated with H<sub>2</sub>O (15 mL). The aqueous layer was extracted with CH<sub>2</sub>Cl<sub>2</sub> (3 x 15 mL), and the combined organic layers were dried (MgSO<sub>4</sub>), filtered, and concentrated. The crude residue was purified by chromatography on SiO<sub>2</sub> (100% MeOH) to afford **48** (0.497 g, 1.18 mmol, 46% over two steps) as a colorless solid: <sup>1</sup>H NMR (300 MHz, DMSO-*d*<sub>6</sub>) δ 11.82 (brs, 1 H), 11.07 (brs, 1 H), 8.54 (d, *J* = 1.9 Hz, 1 H), 8.41 (d, *J* = 2.0 Hz, 1 H), 7.90 (s, 1 H), 7.76 (s, 1 H), 7.69 (d, *J* = 8.0 Hz, 2 H), 7.48 (s, 2 H), 7.40 (d, *J* = 8.0 Hz, 2 H), 7.36–7.34 (m, 1 H), 6.49 (brs, 1 H), 3.50 (s, 2 H), 2.45–2.26 (m, 8 H), 2.15 (s, 3 H). Spectral data were consistent with previously reported properties.<sup>3</sup>

## 8. References

1. R. Cano, M. Yus and D. J. Ramon, *Tetrahedron Lett.*, 2013, **54**, 3394–3397.
2. S. Rinkam, W. Senapak, S. Watchasit, R. Saeeng and U. Sirion, *Synlett.*, 2022, **33**, 1383–1390.
3. V. S. Goodfellow, C. J. Loweth, S. B. Ravula, T. Wiemann, T. Nguyen, Y. Xu, D. E. Todd, D. Sheppard, S. Pollack, O. Polesskaya, D. F. Marker, S. Dewhurst and H. Gelbard, *J. Med. Chem.*, 2013, **56**, 8032–8048

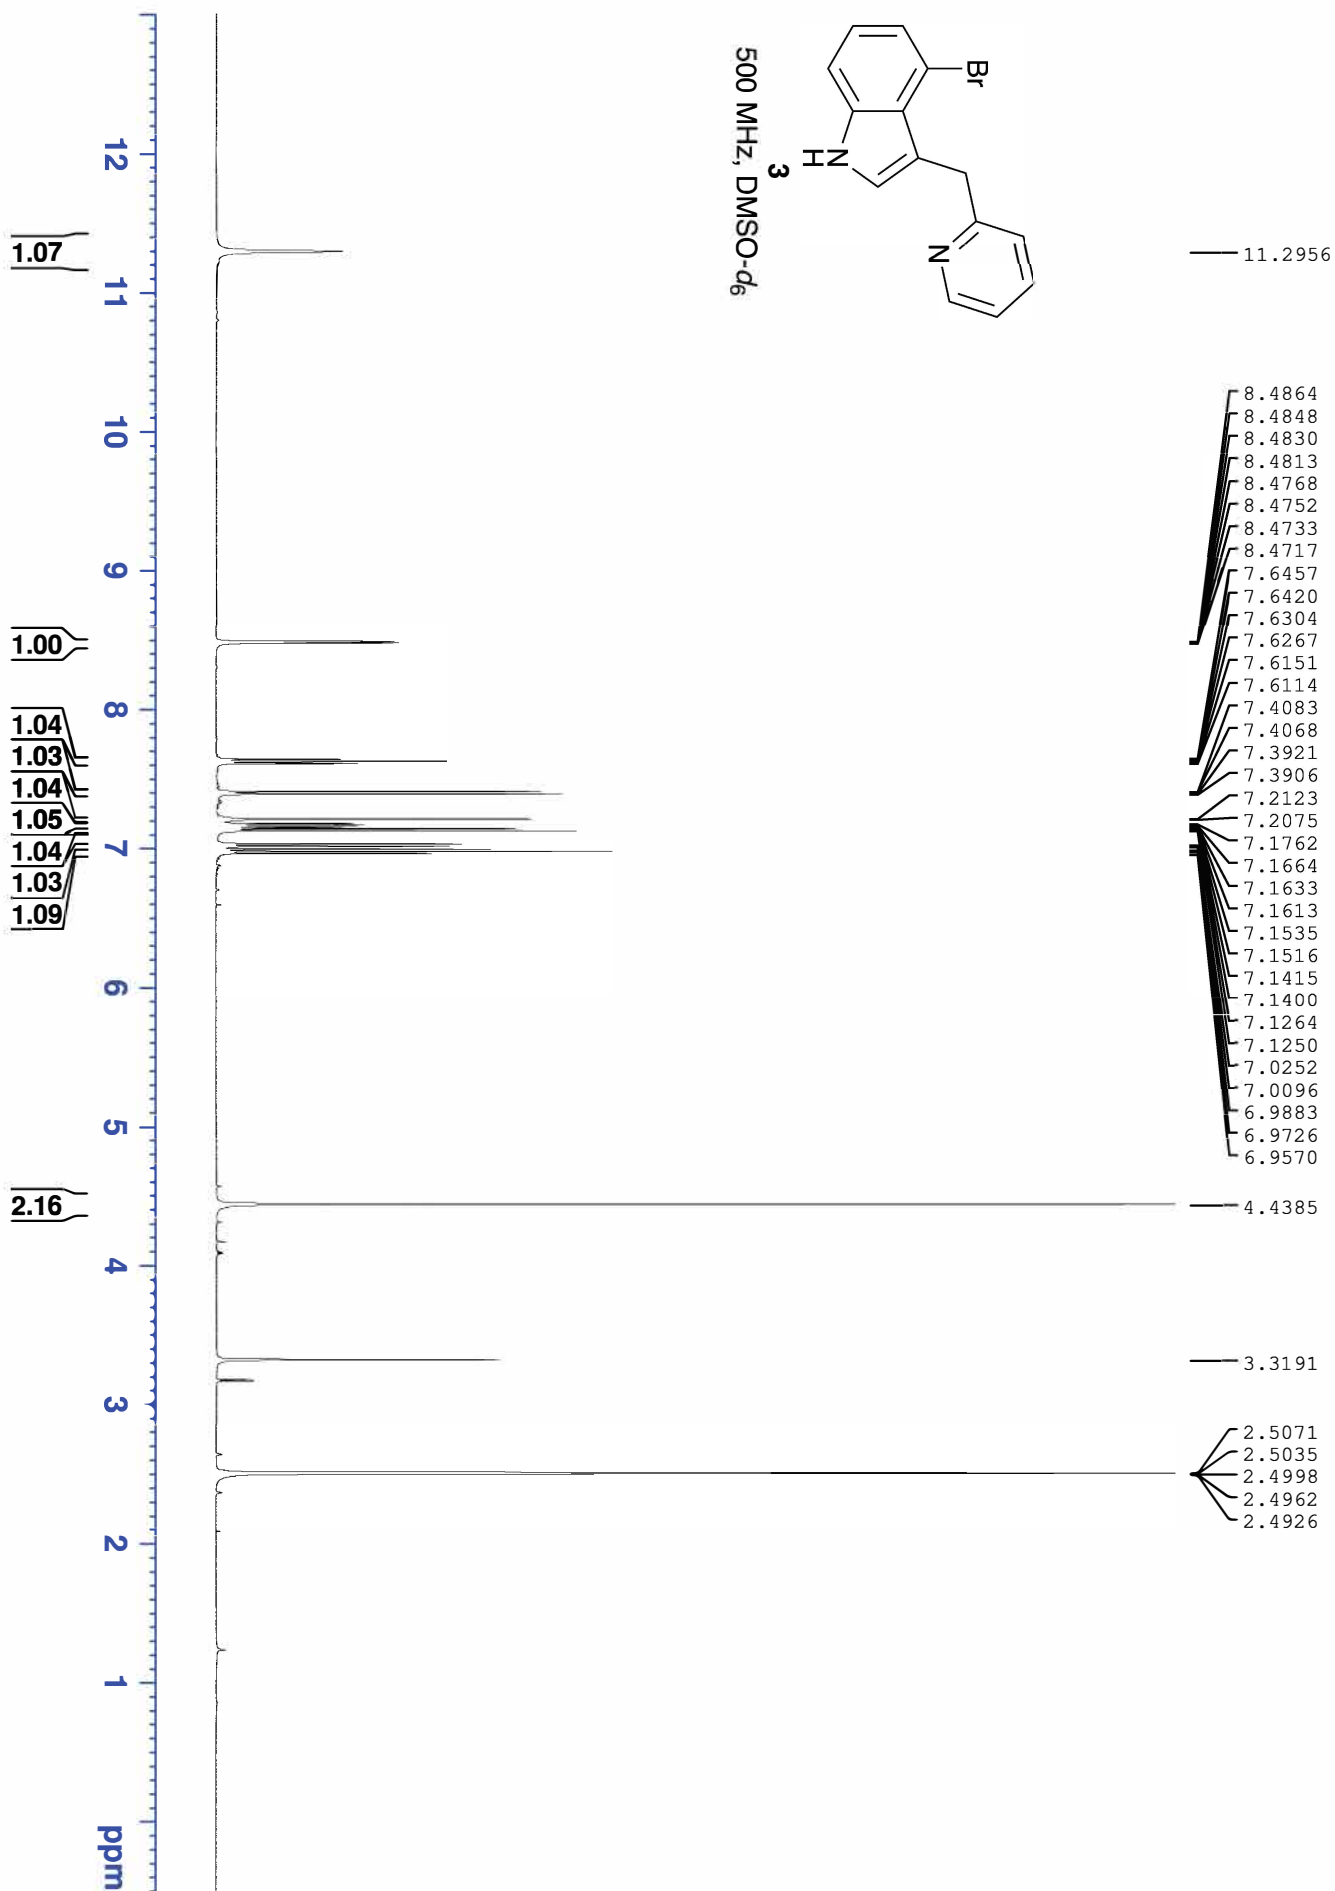

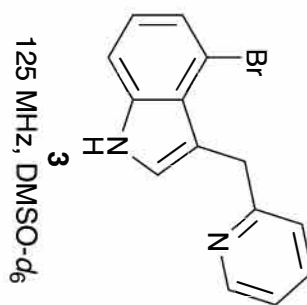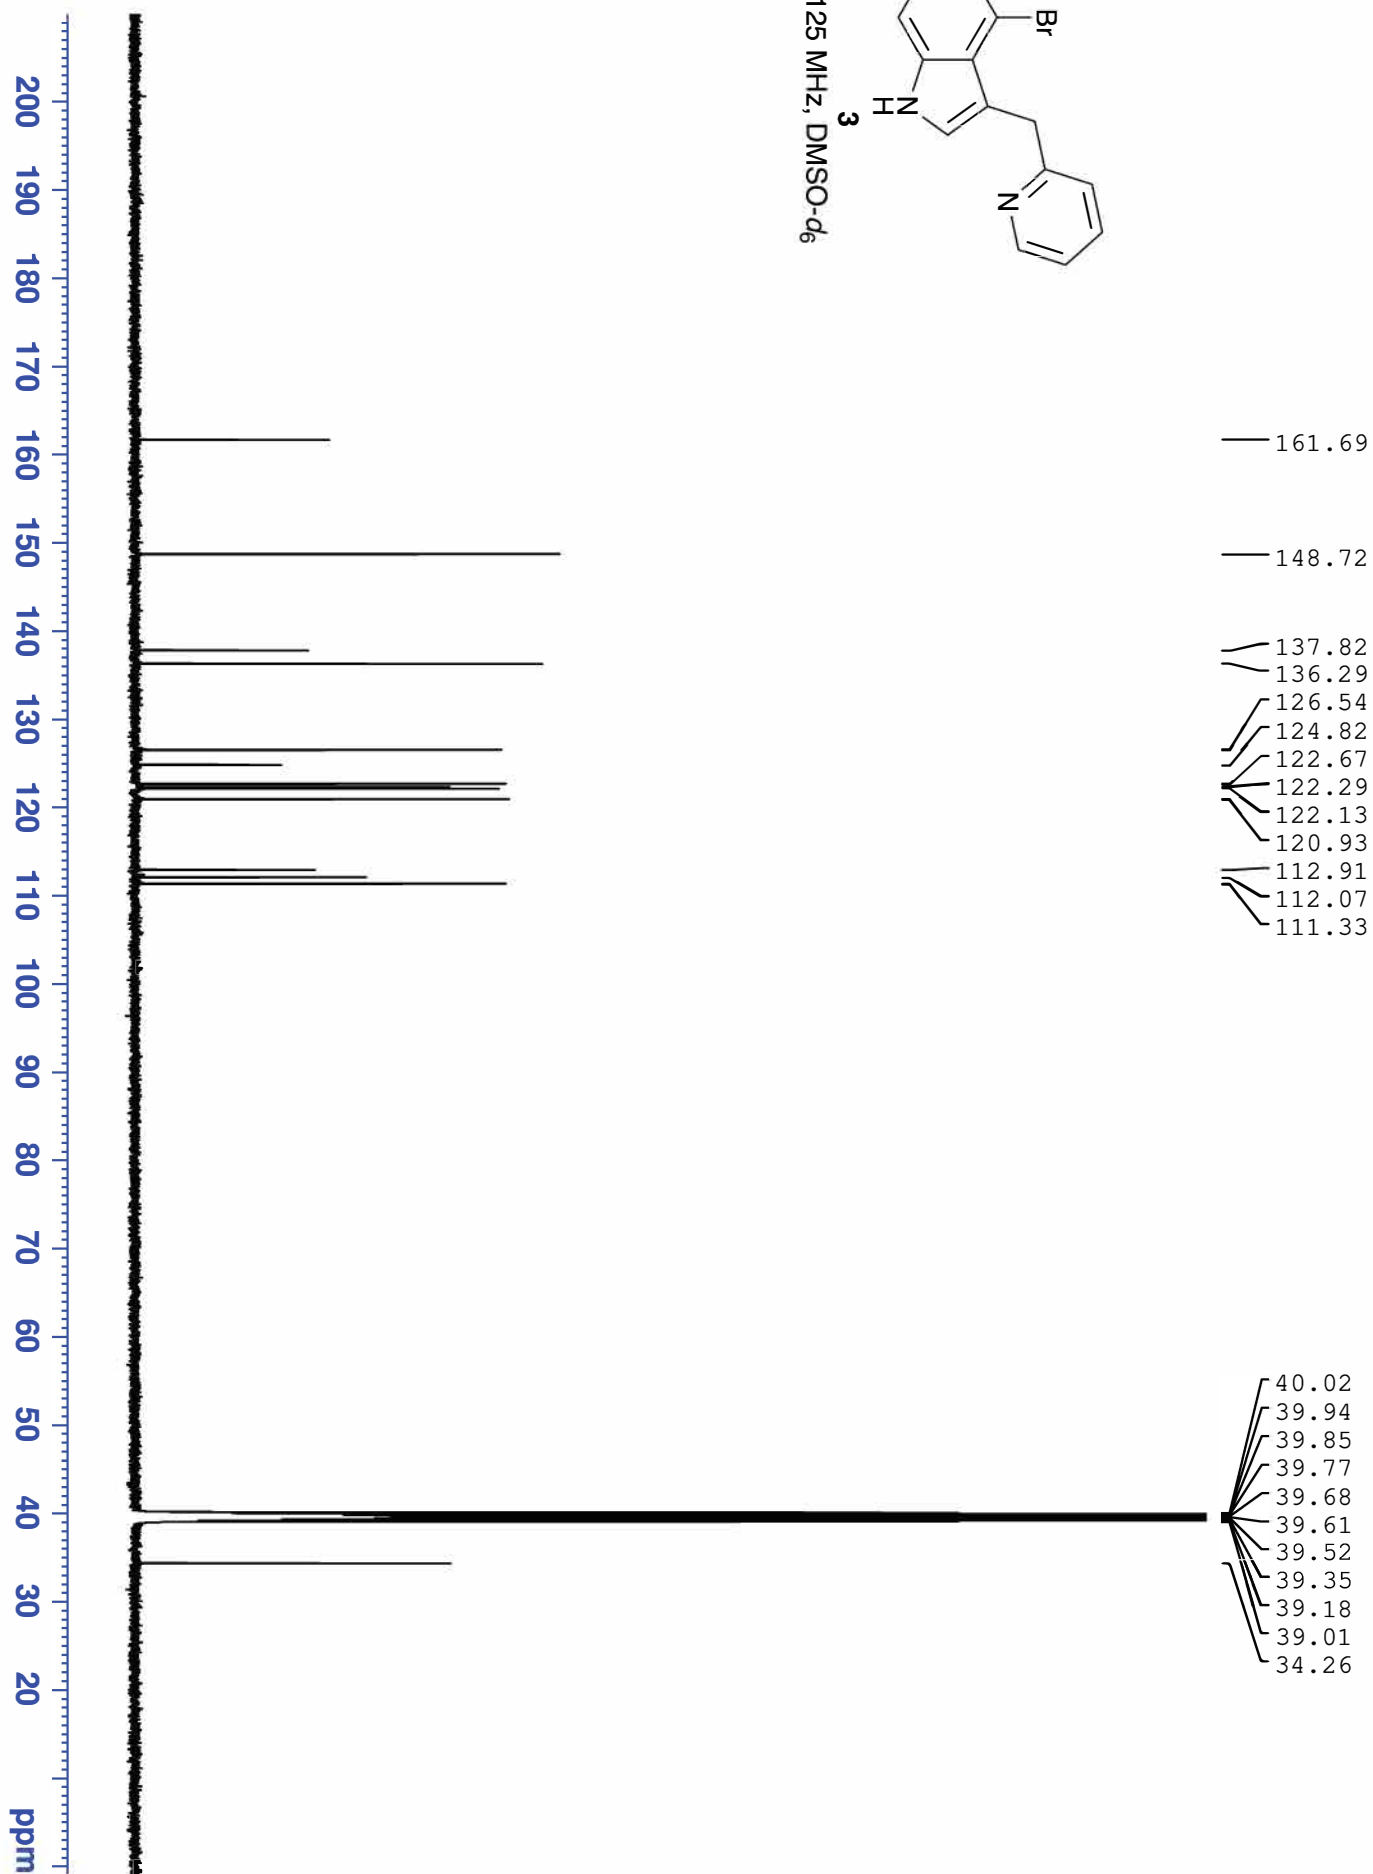

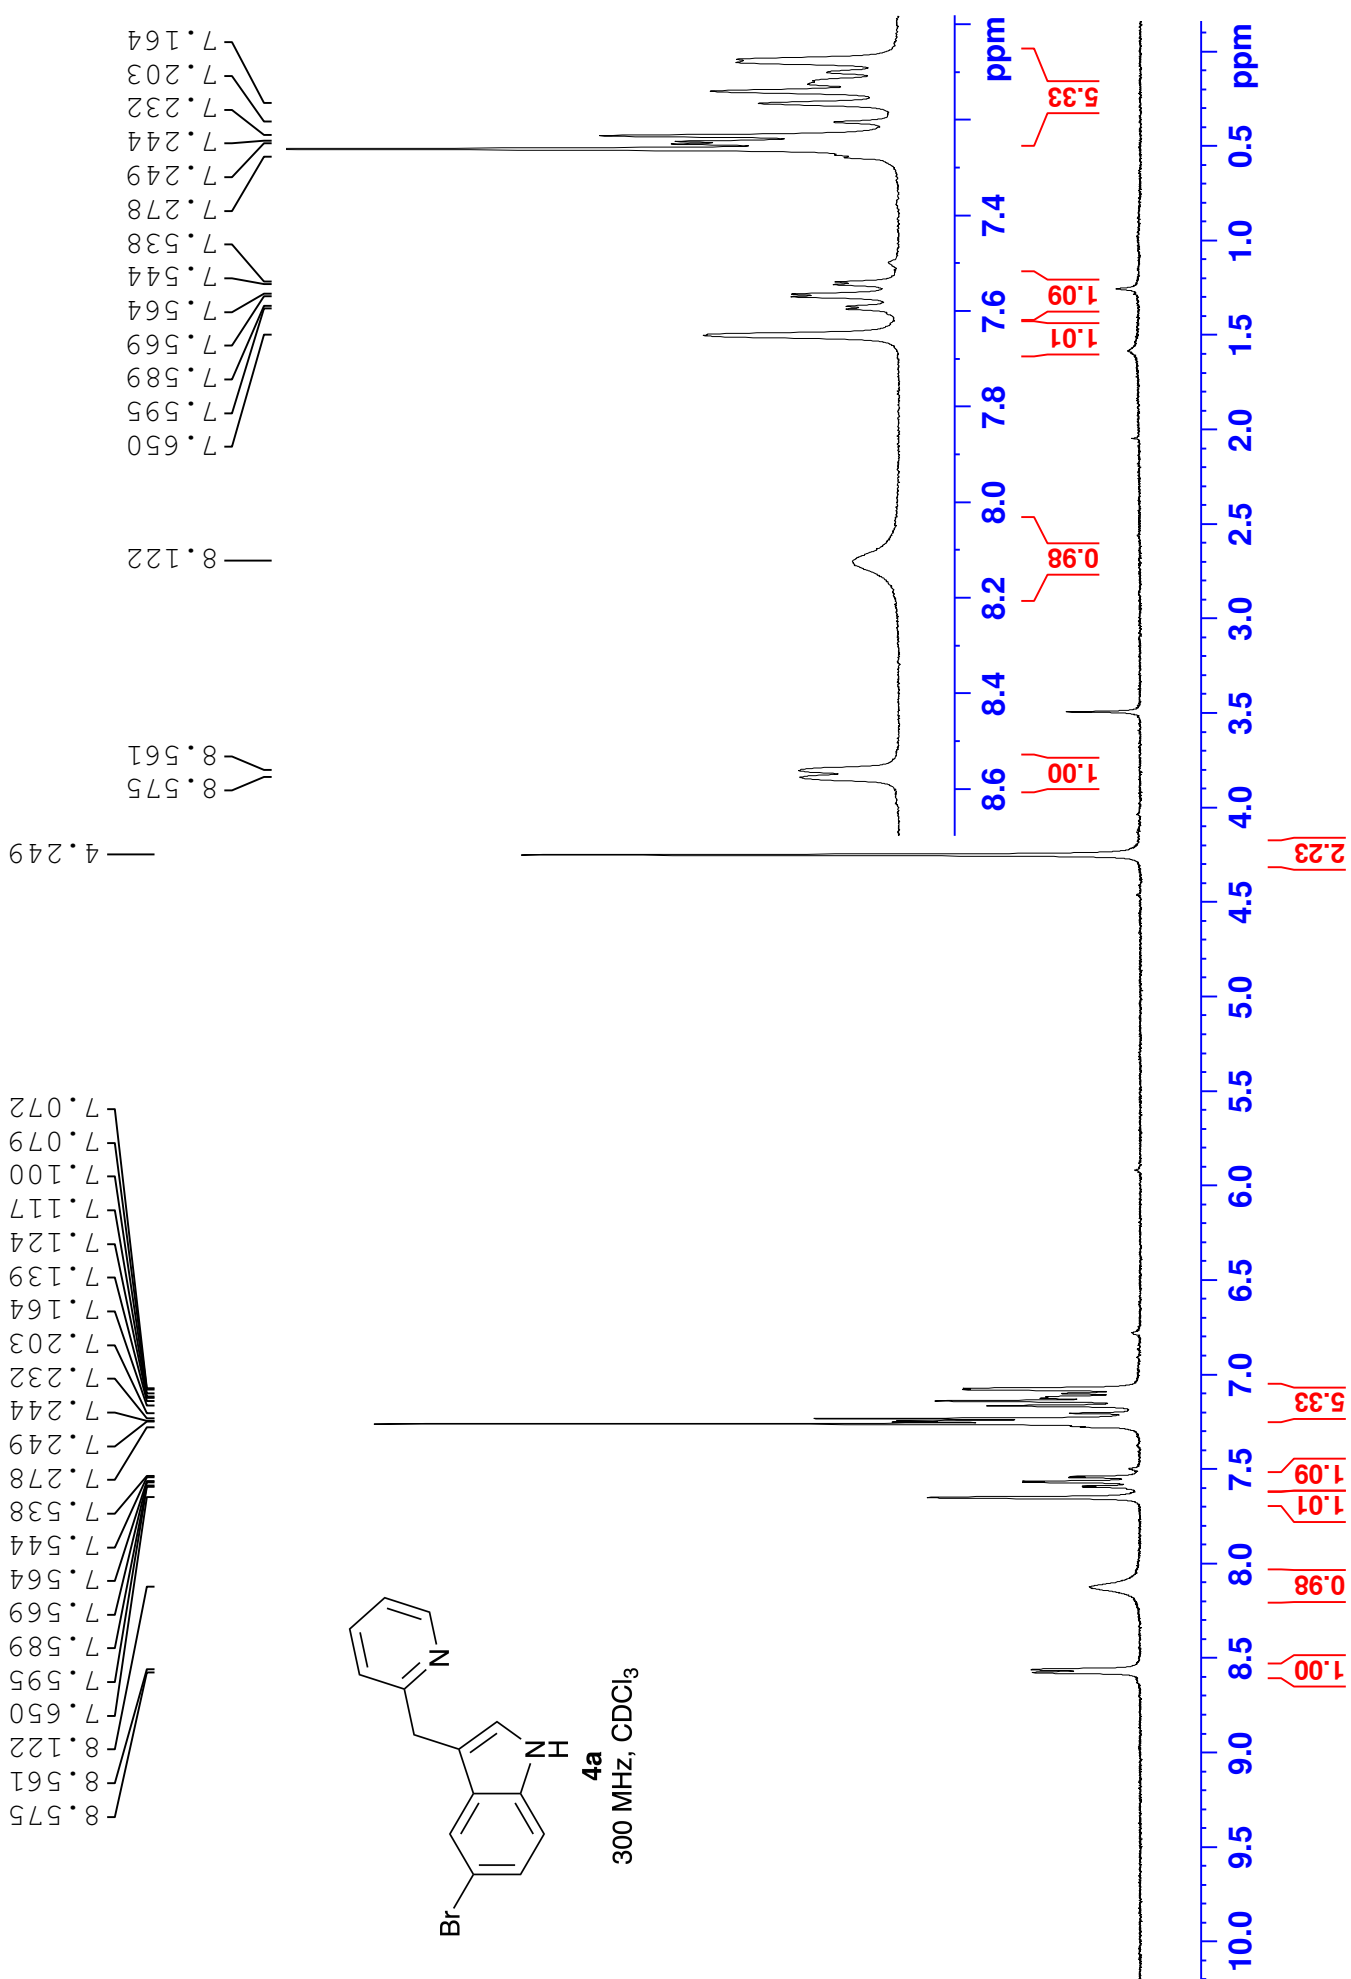

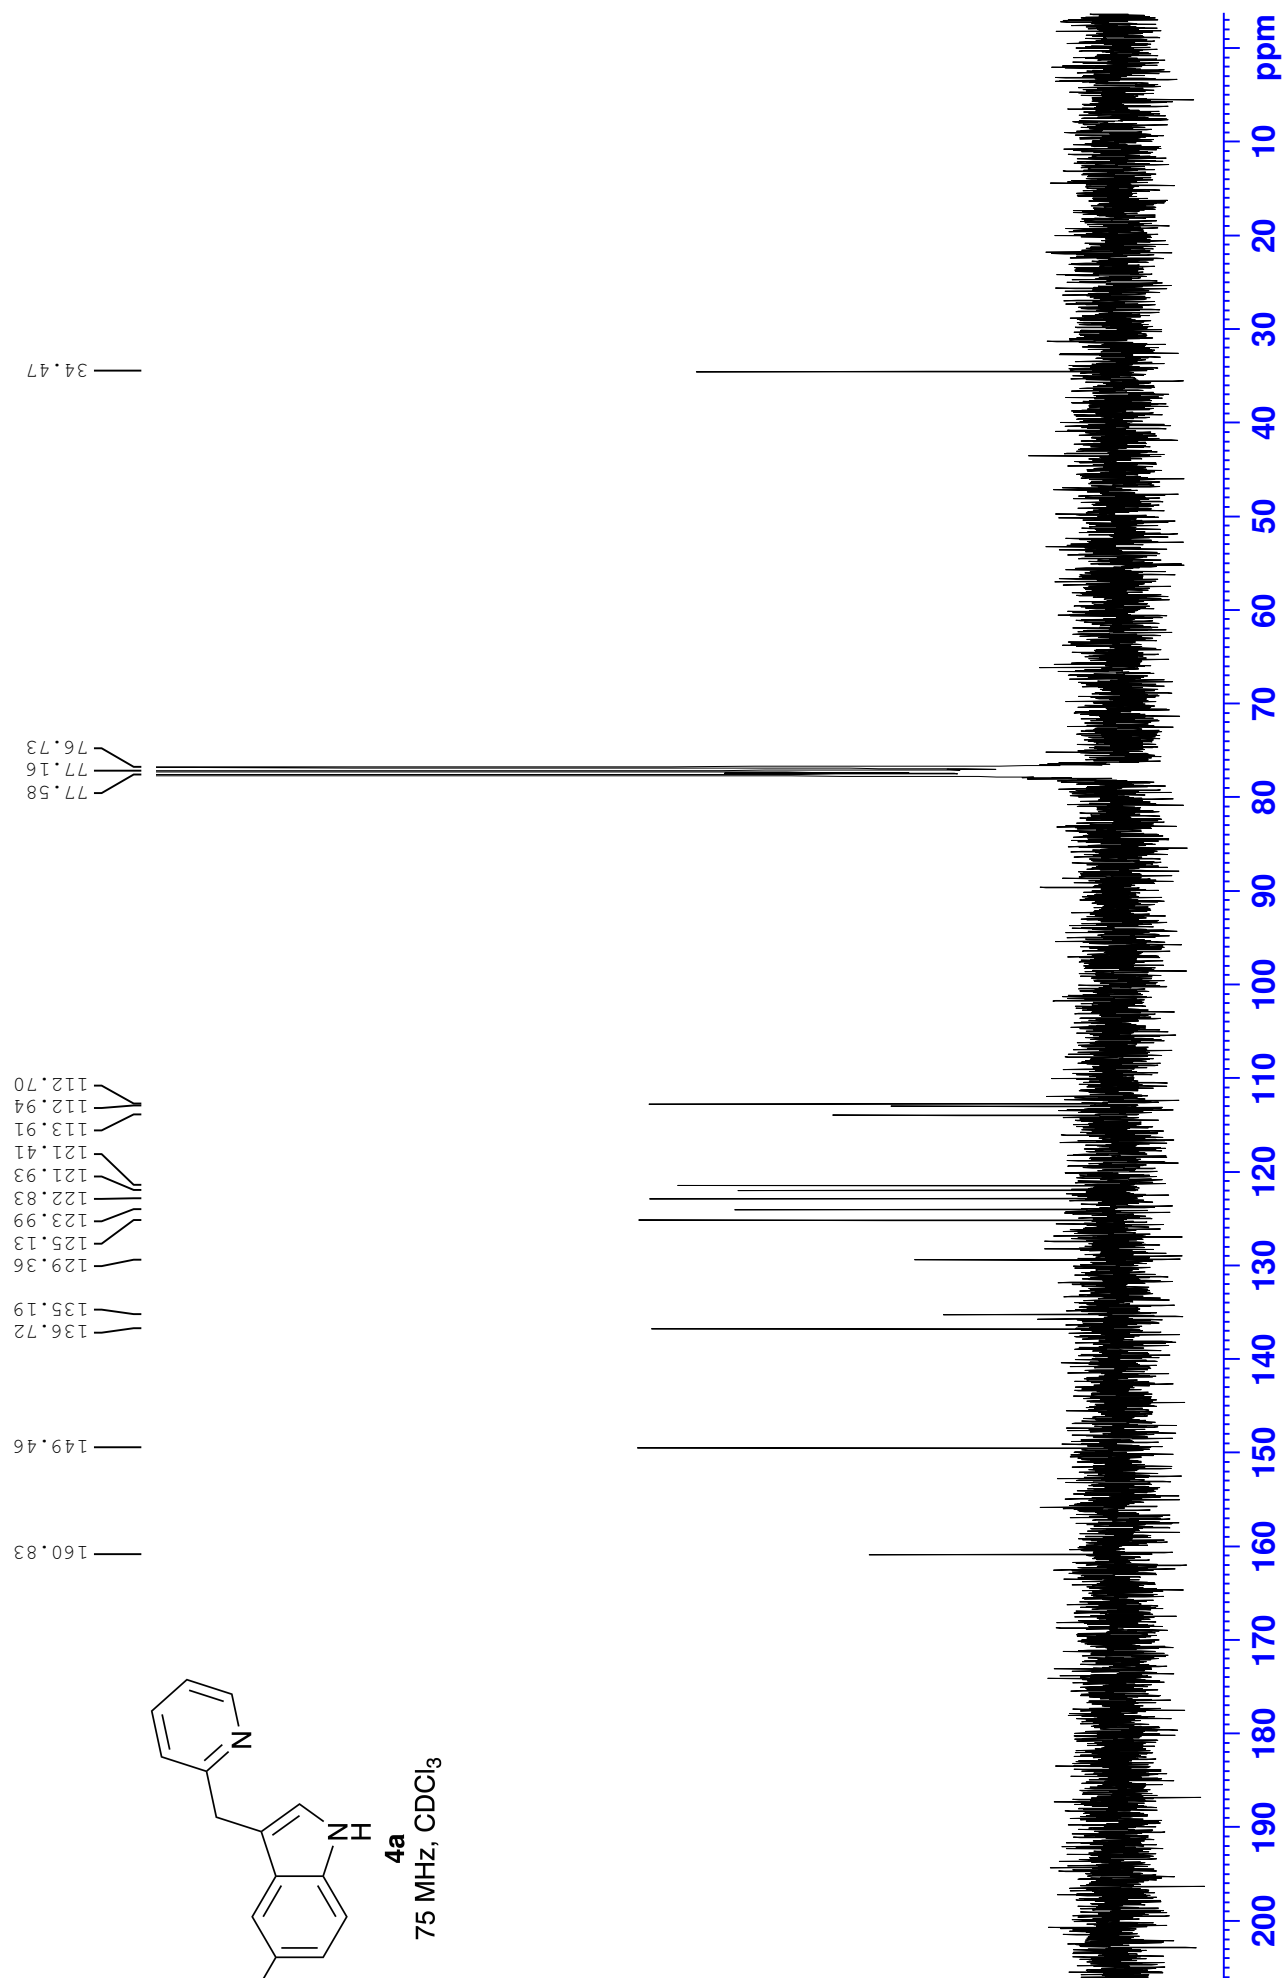

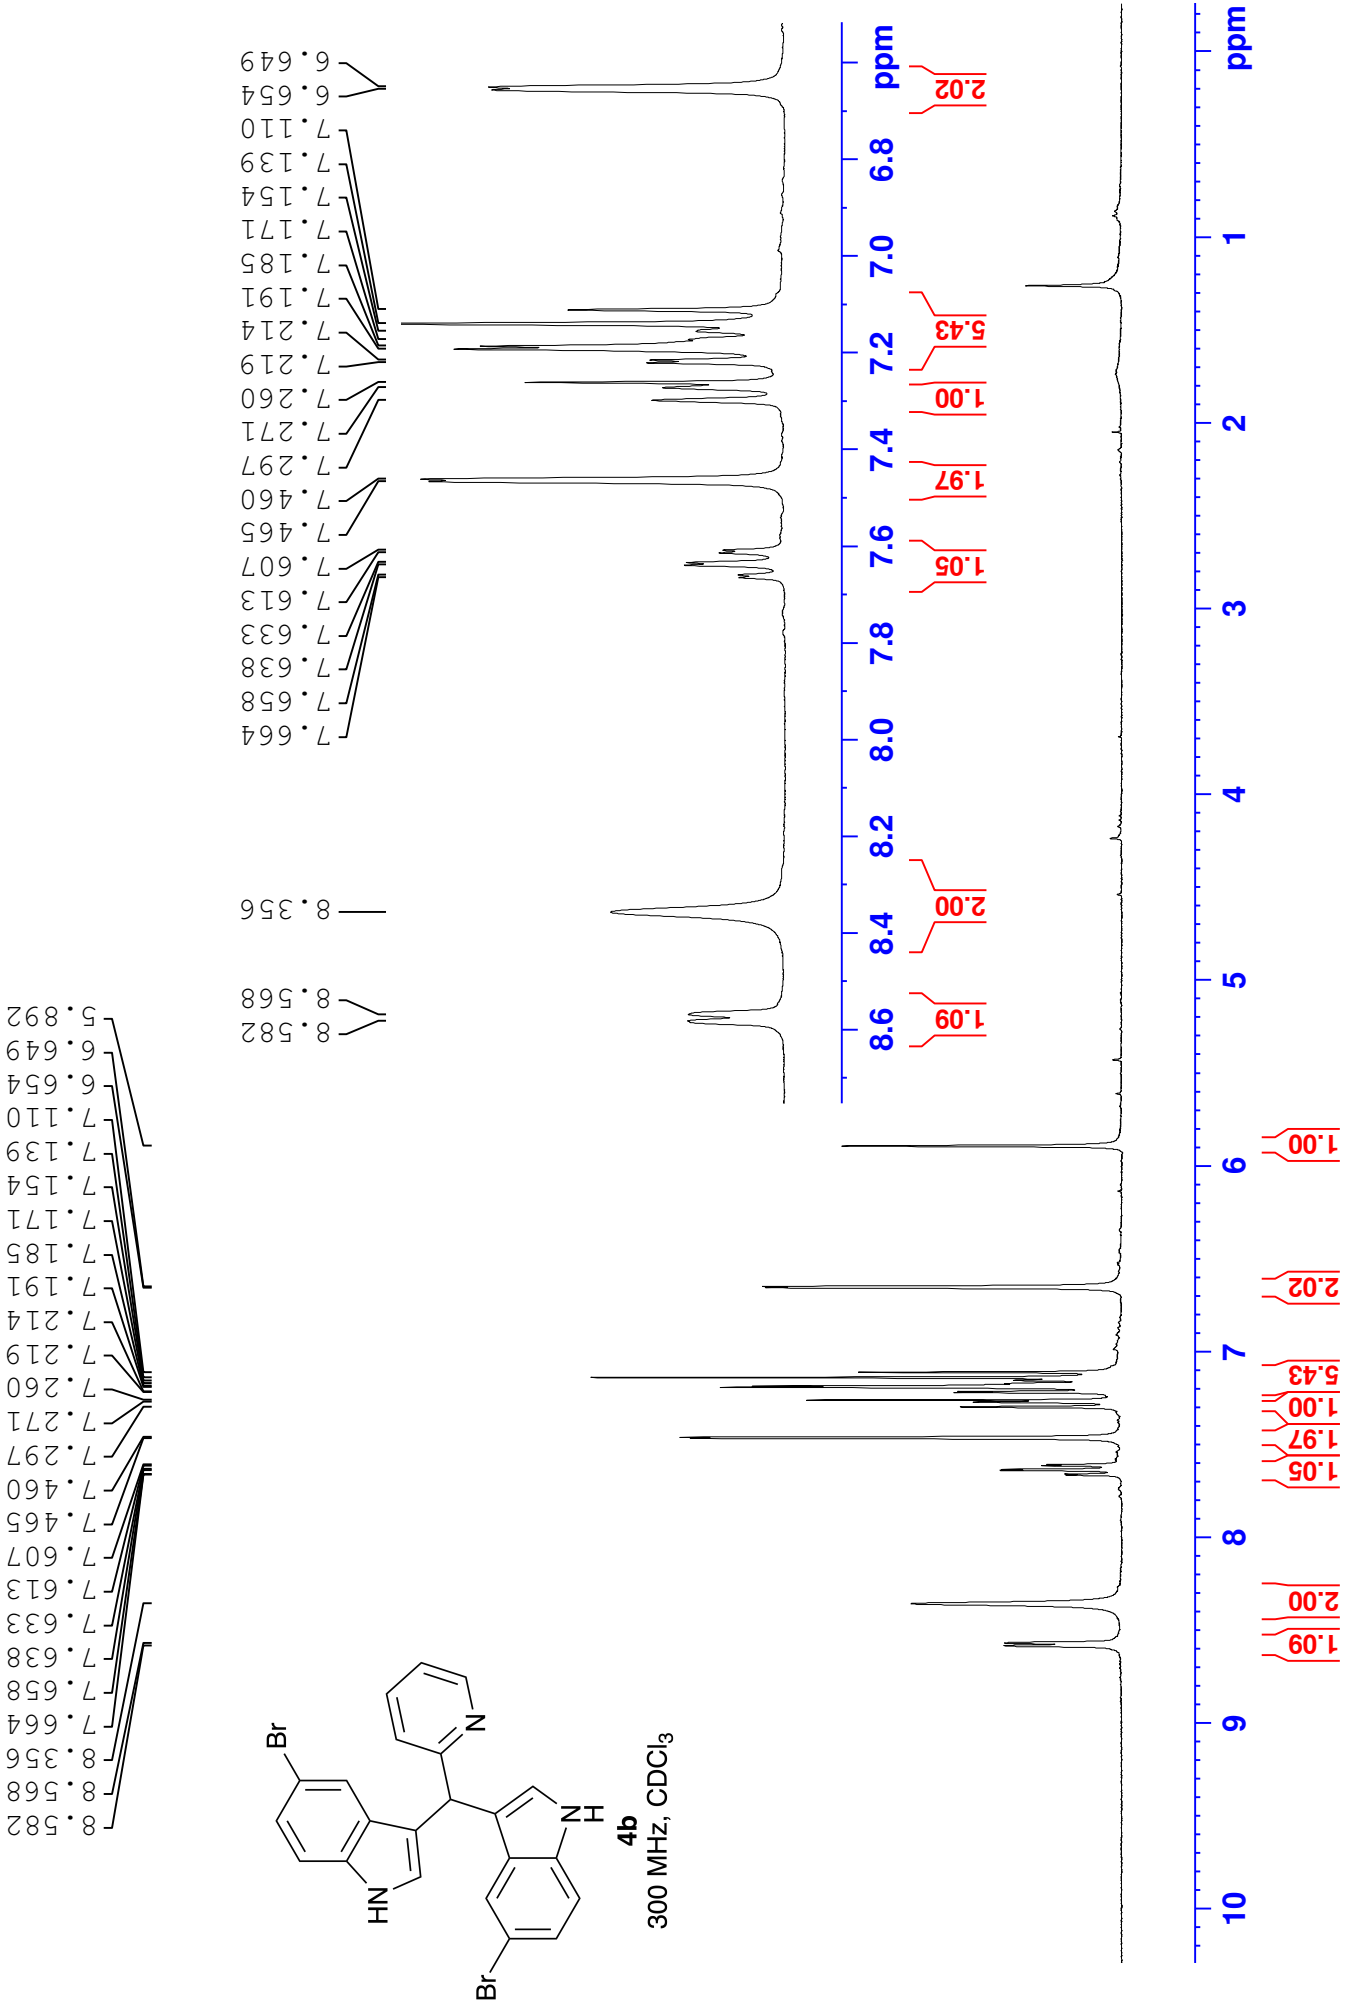



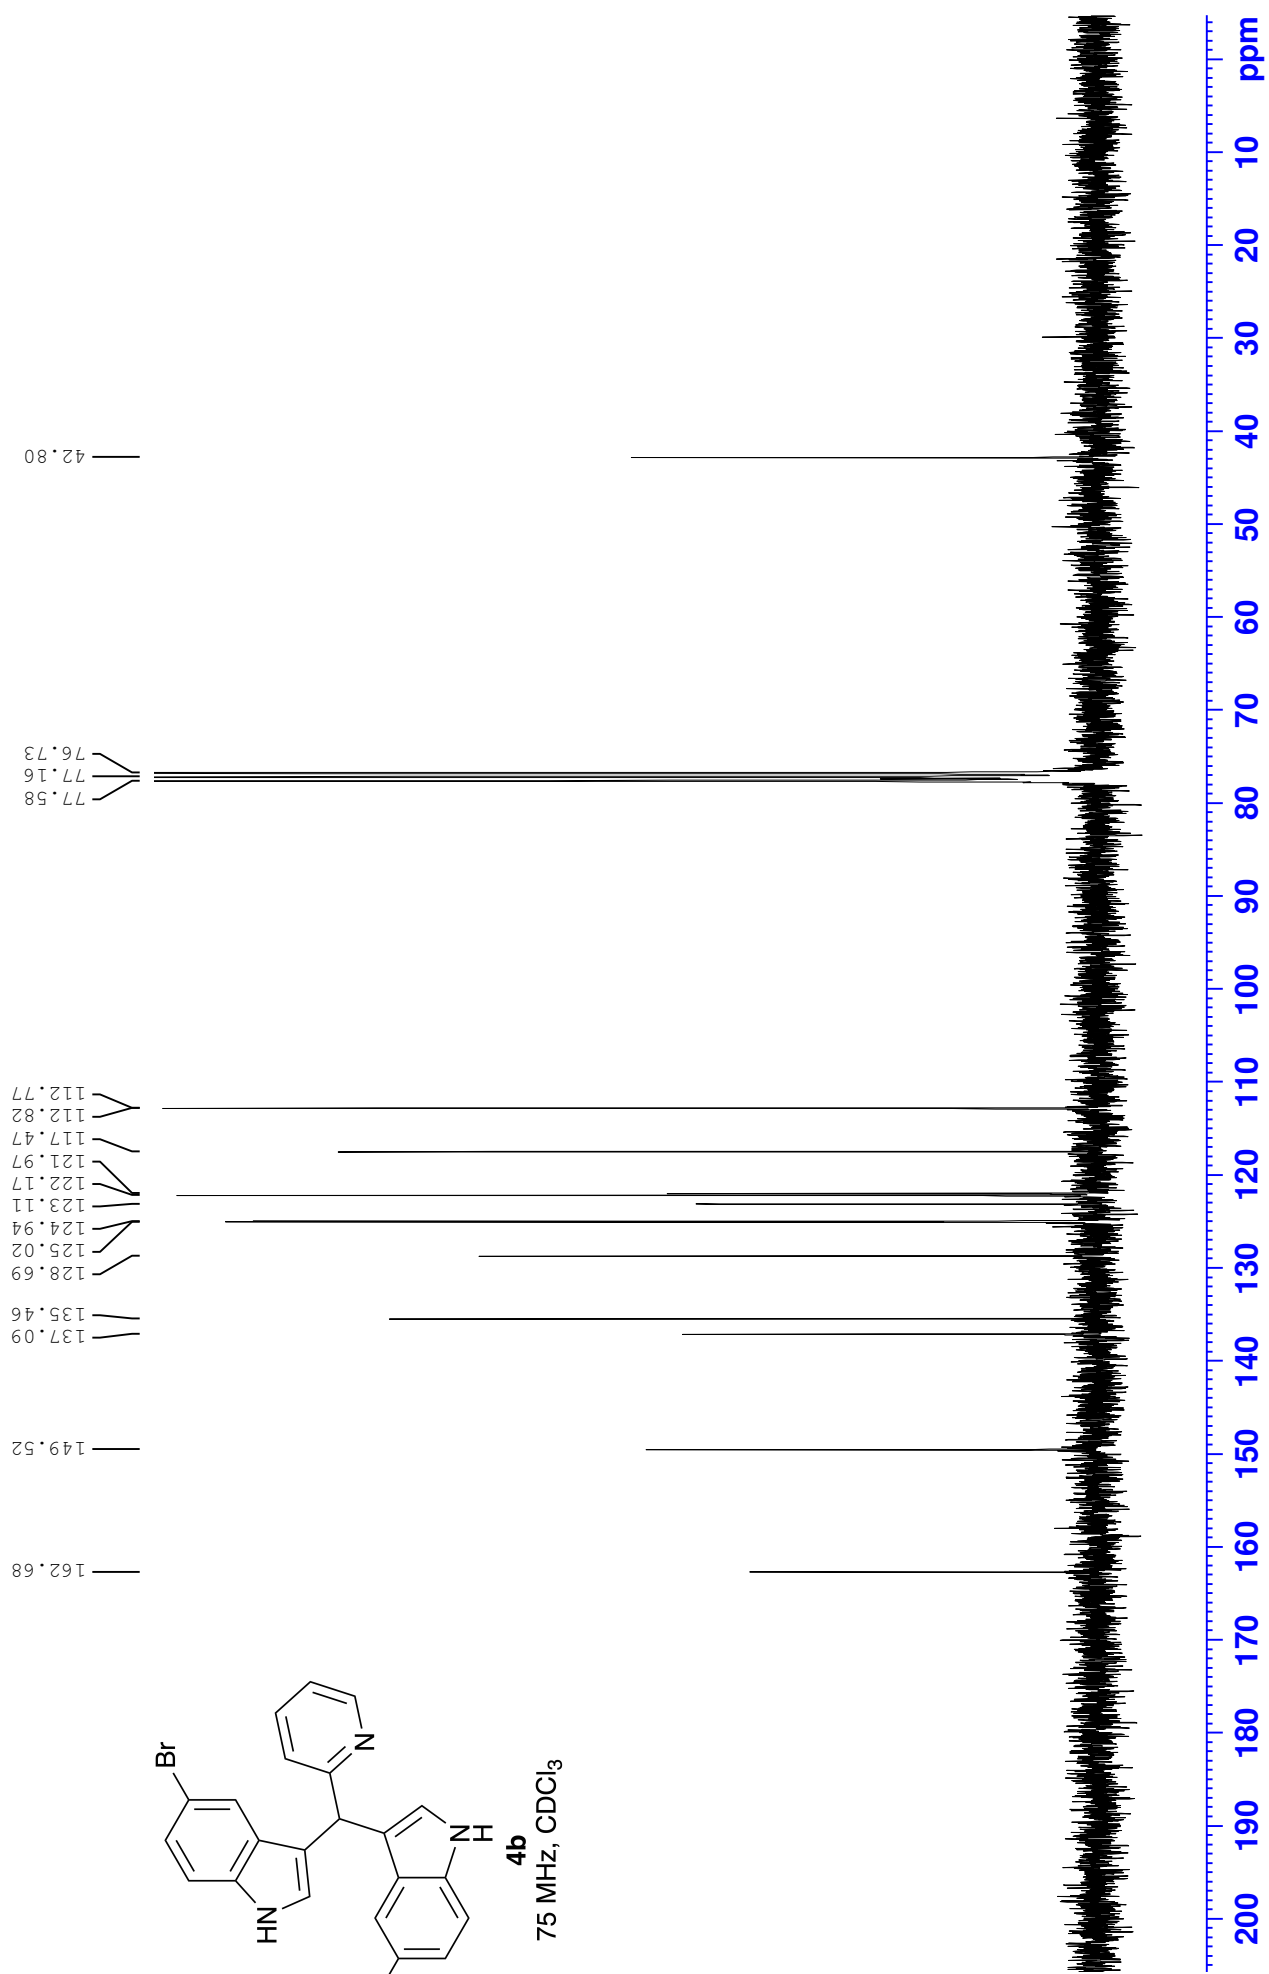

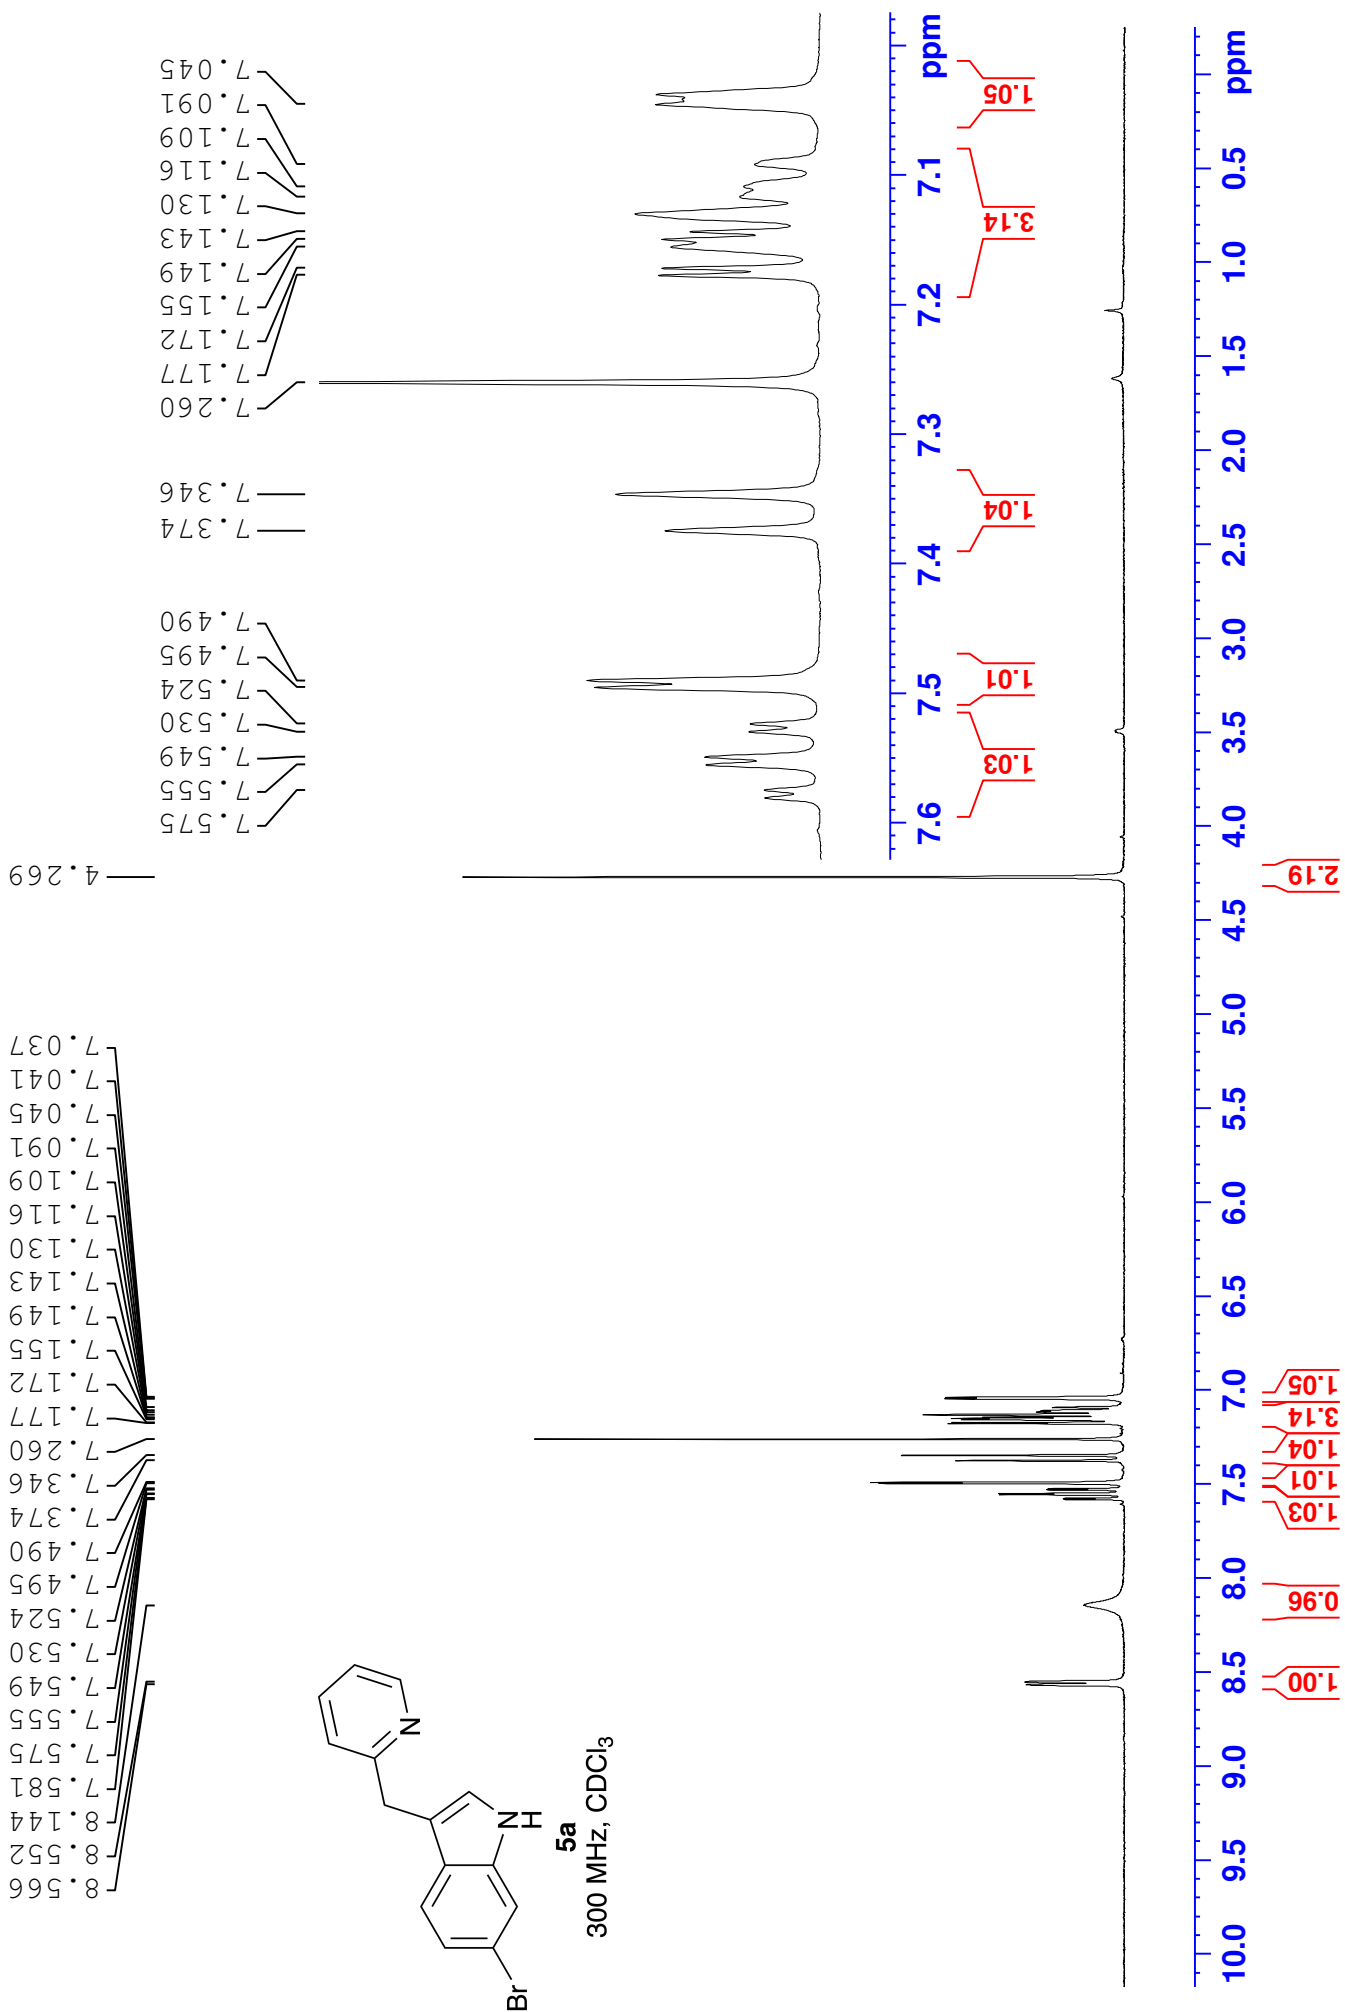

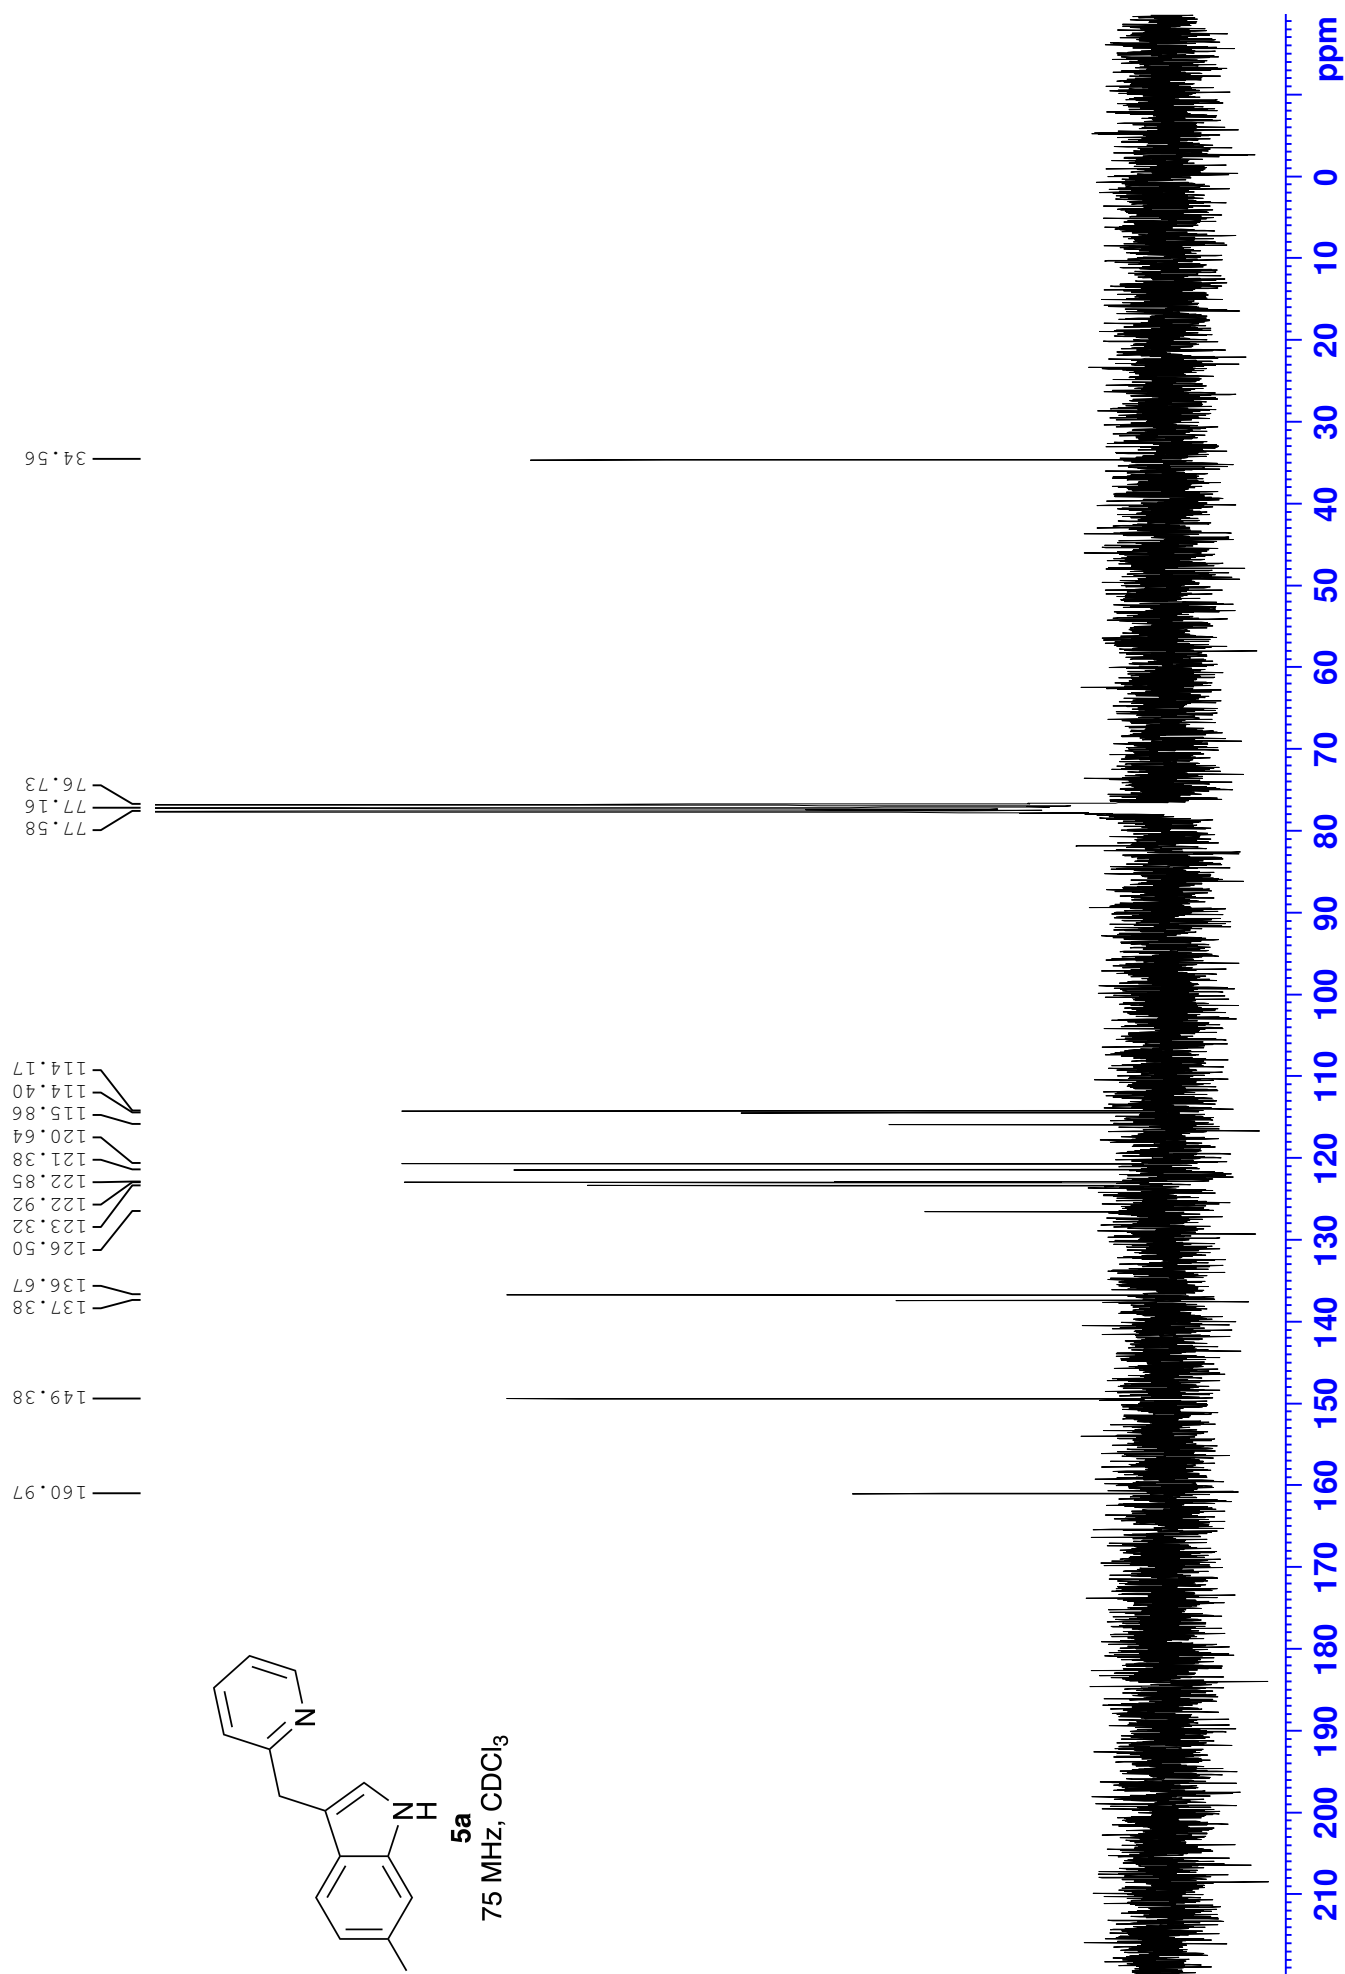

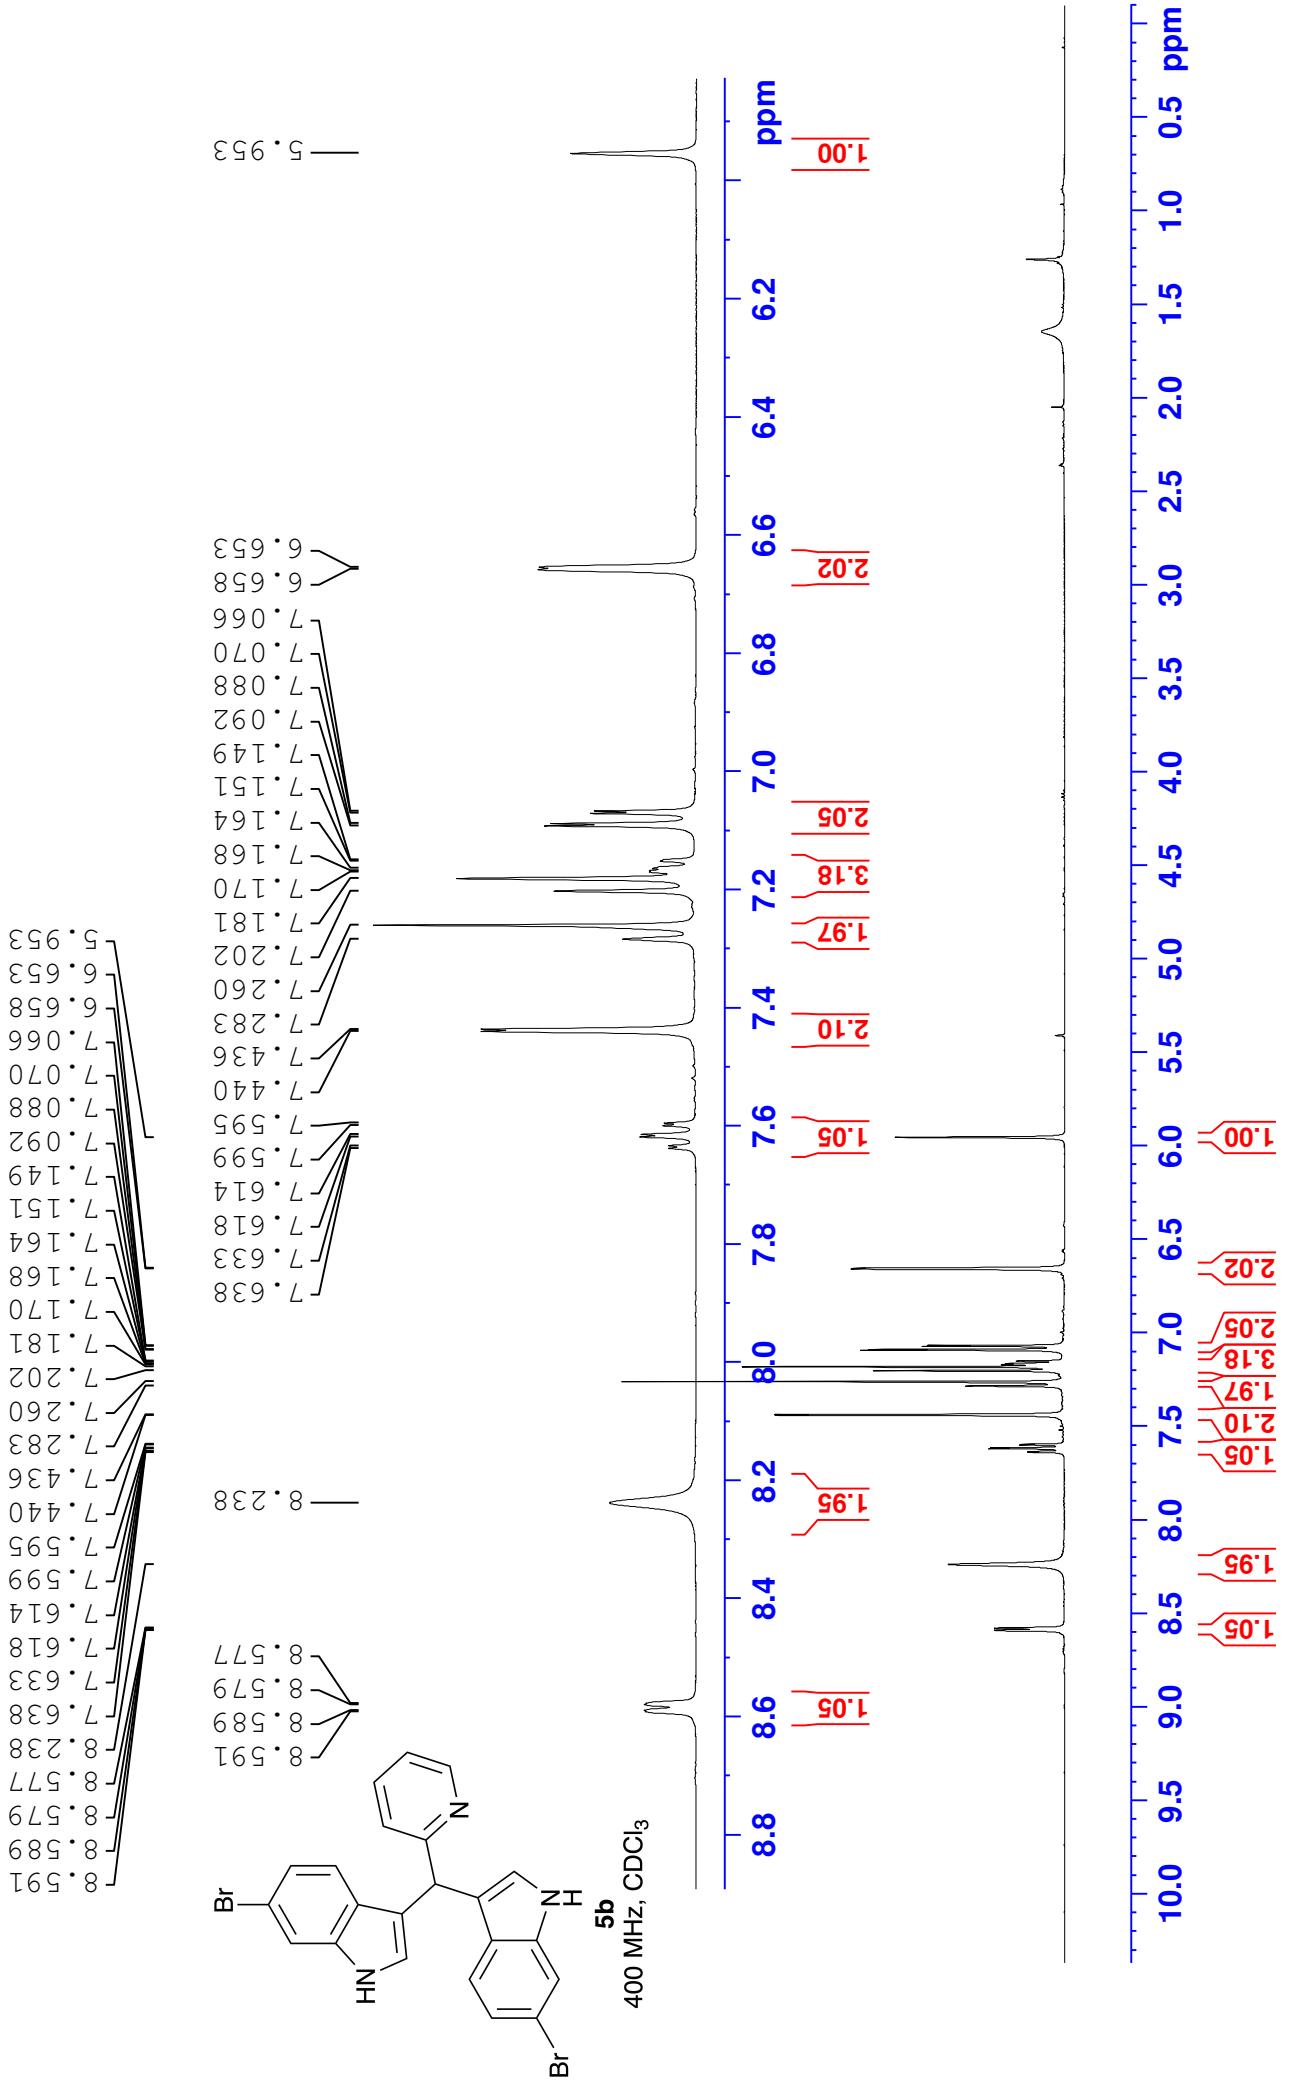

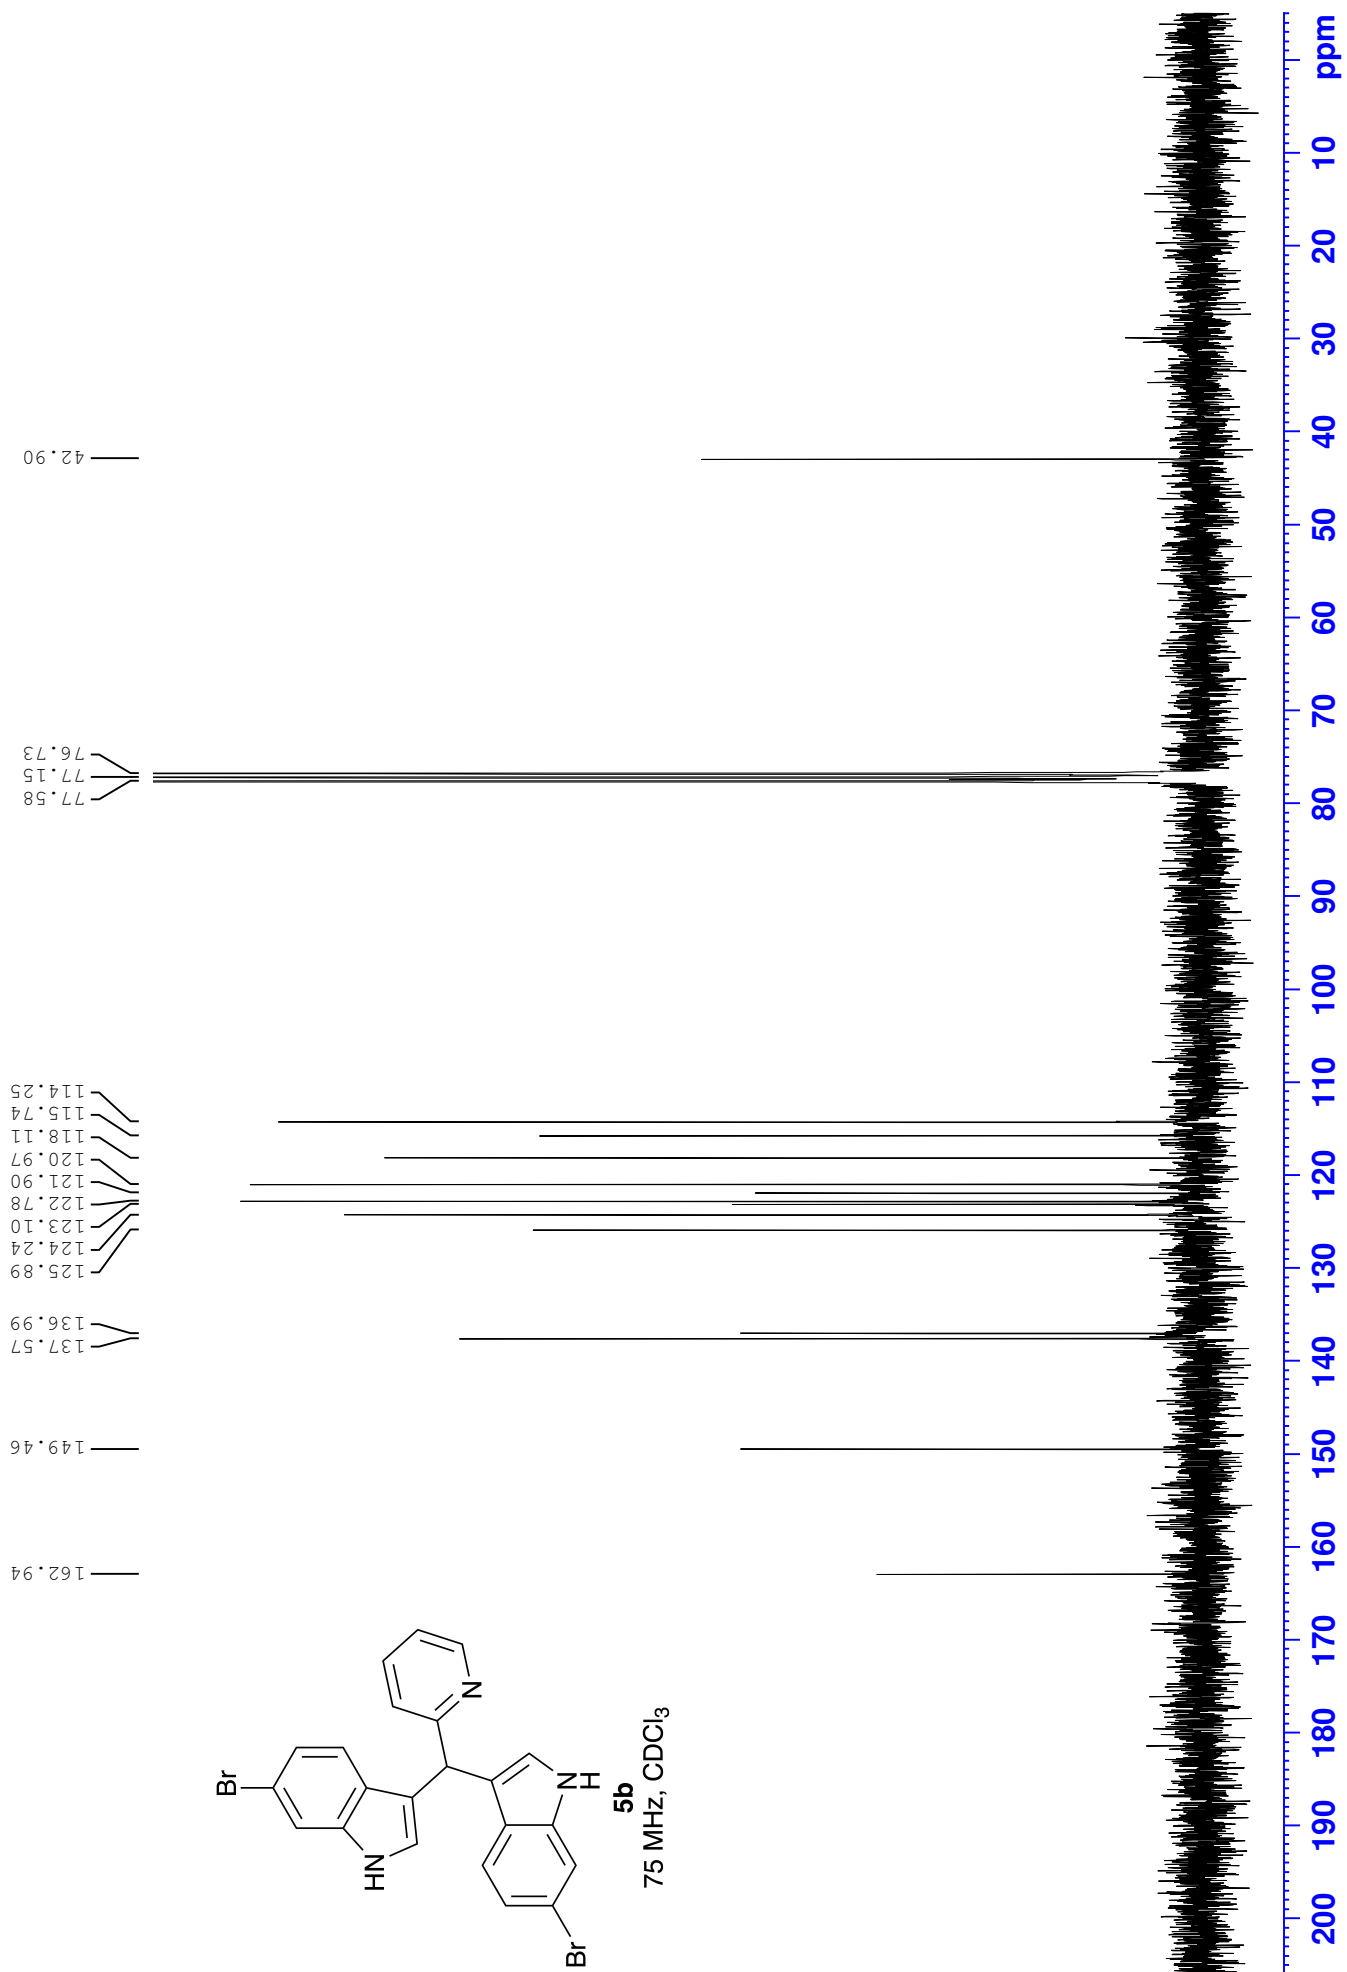

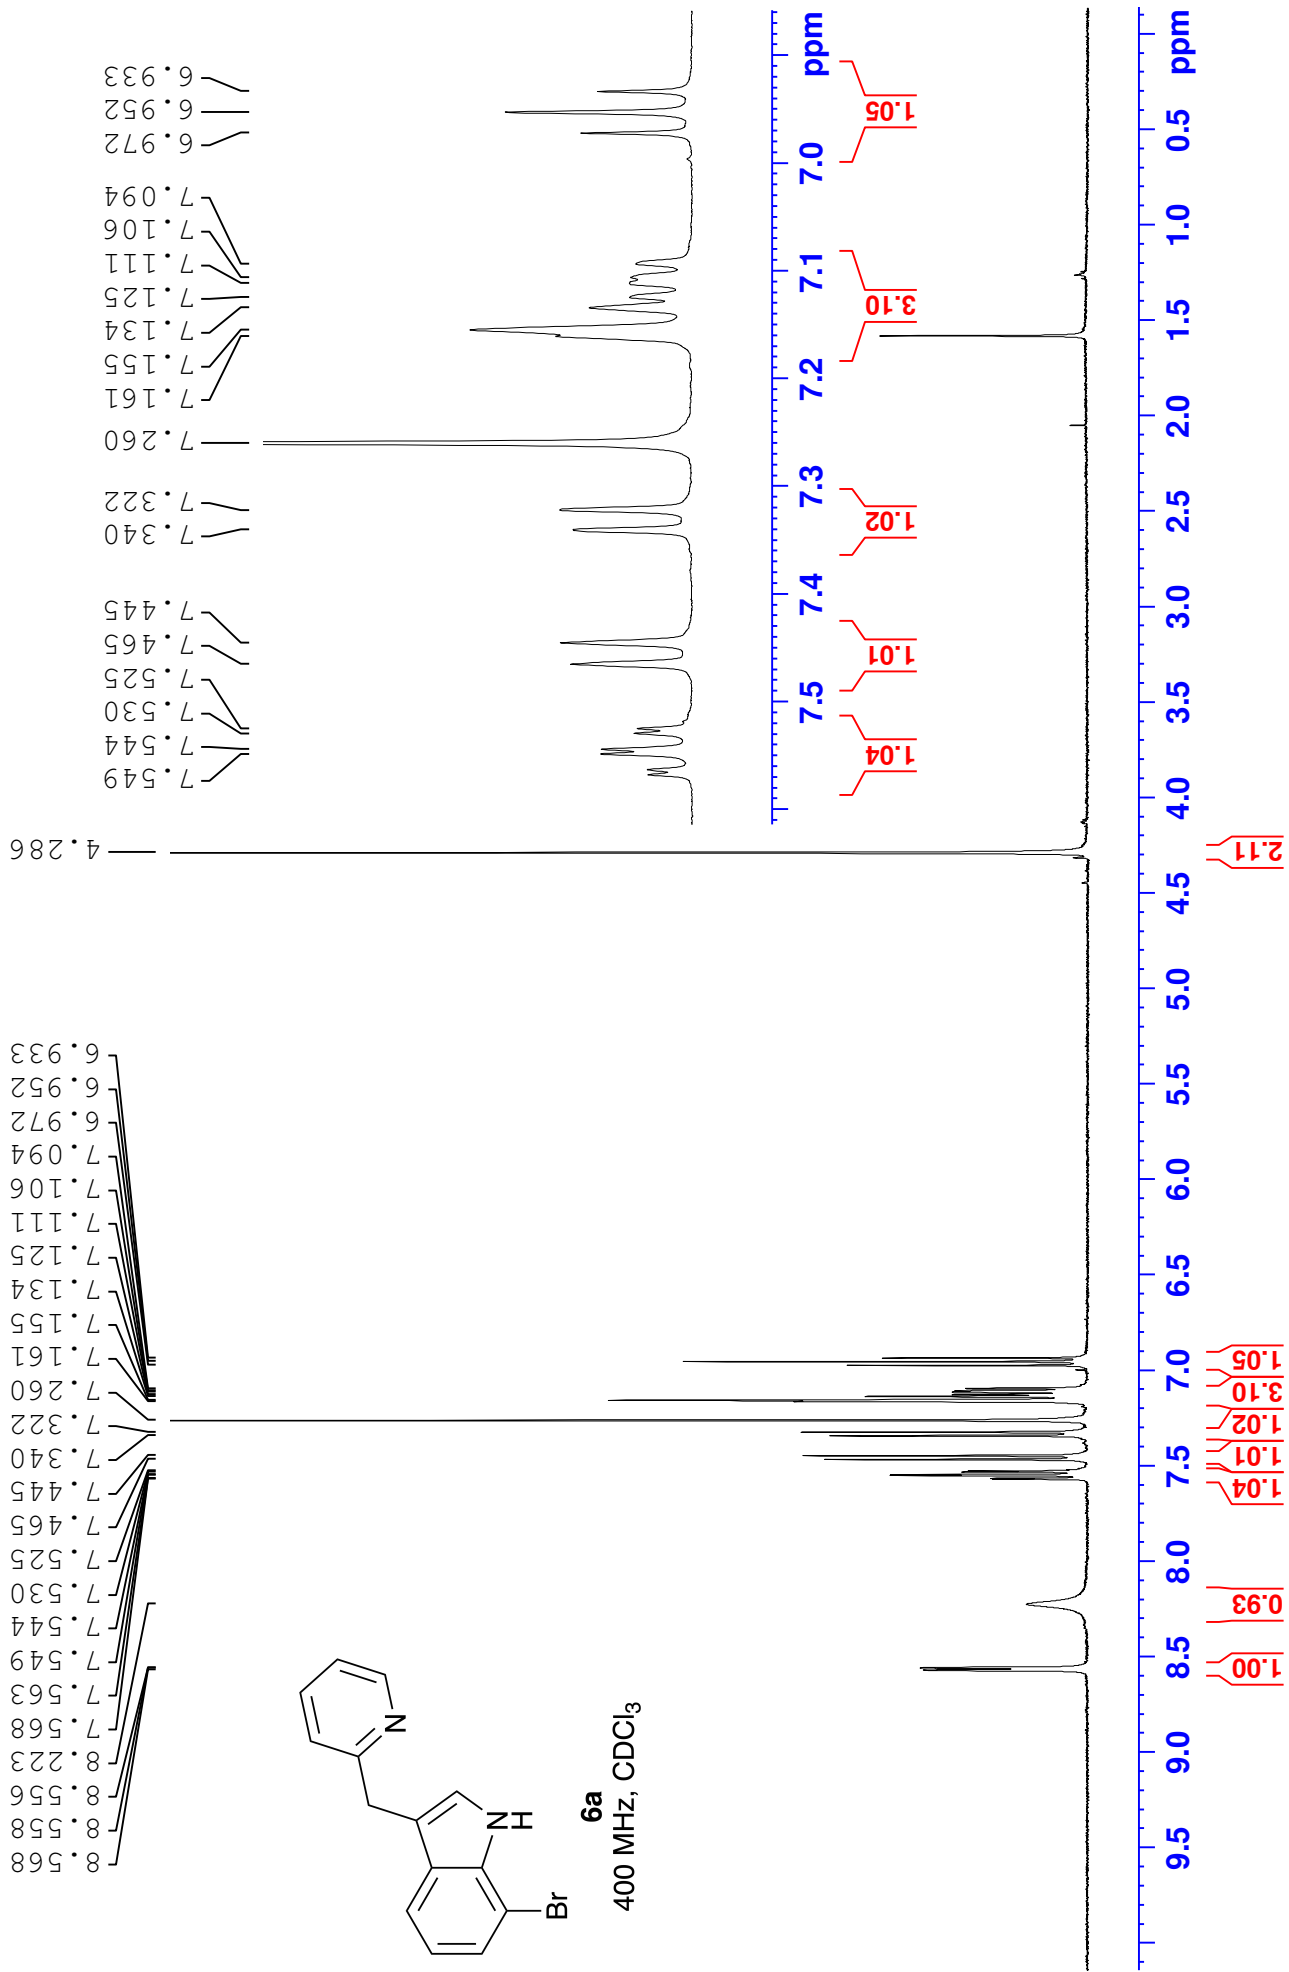

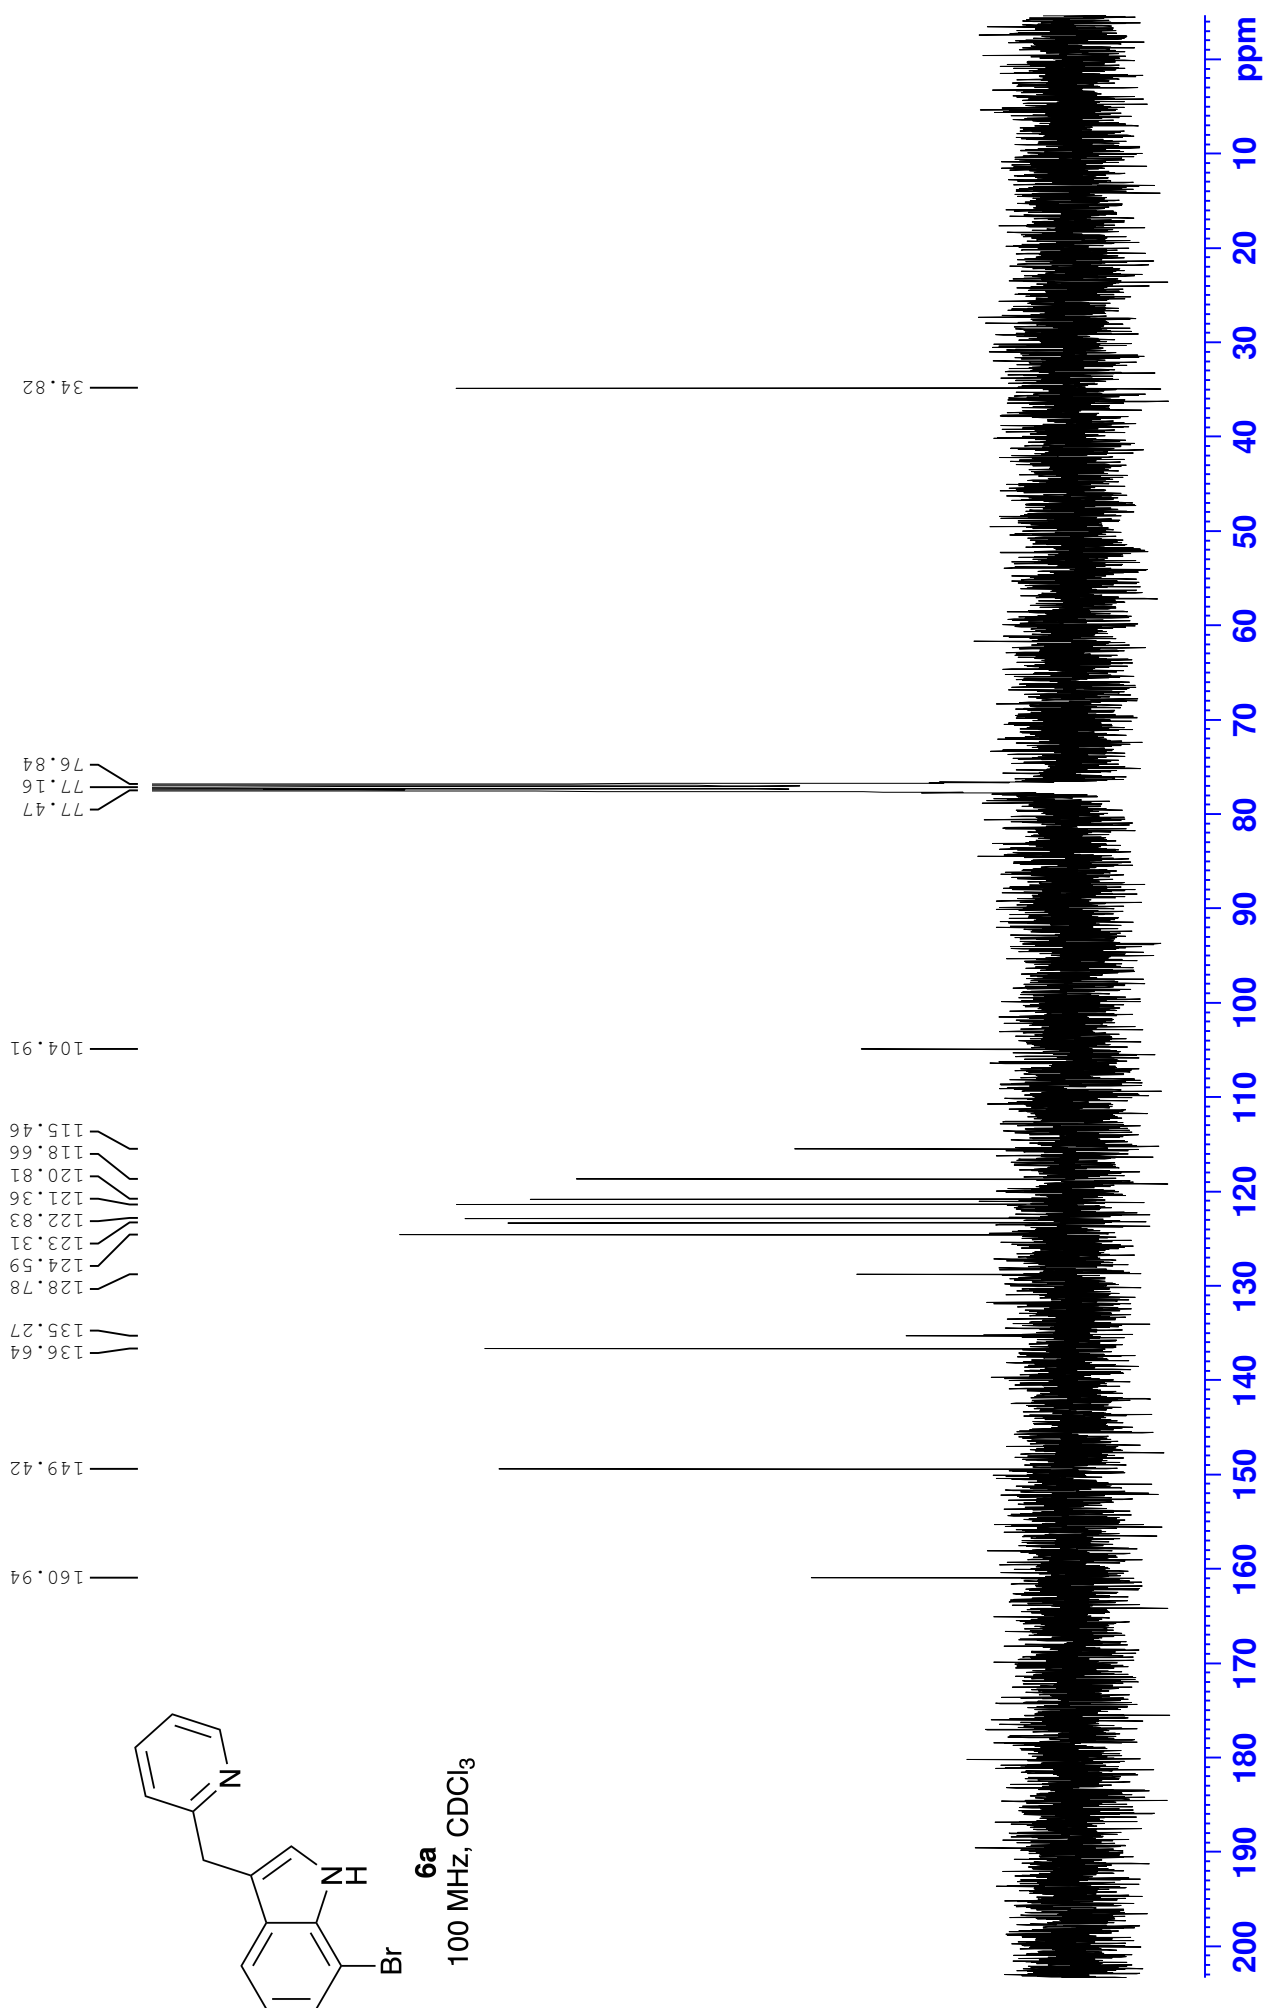

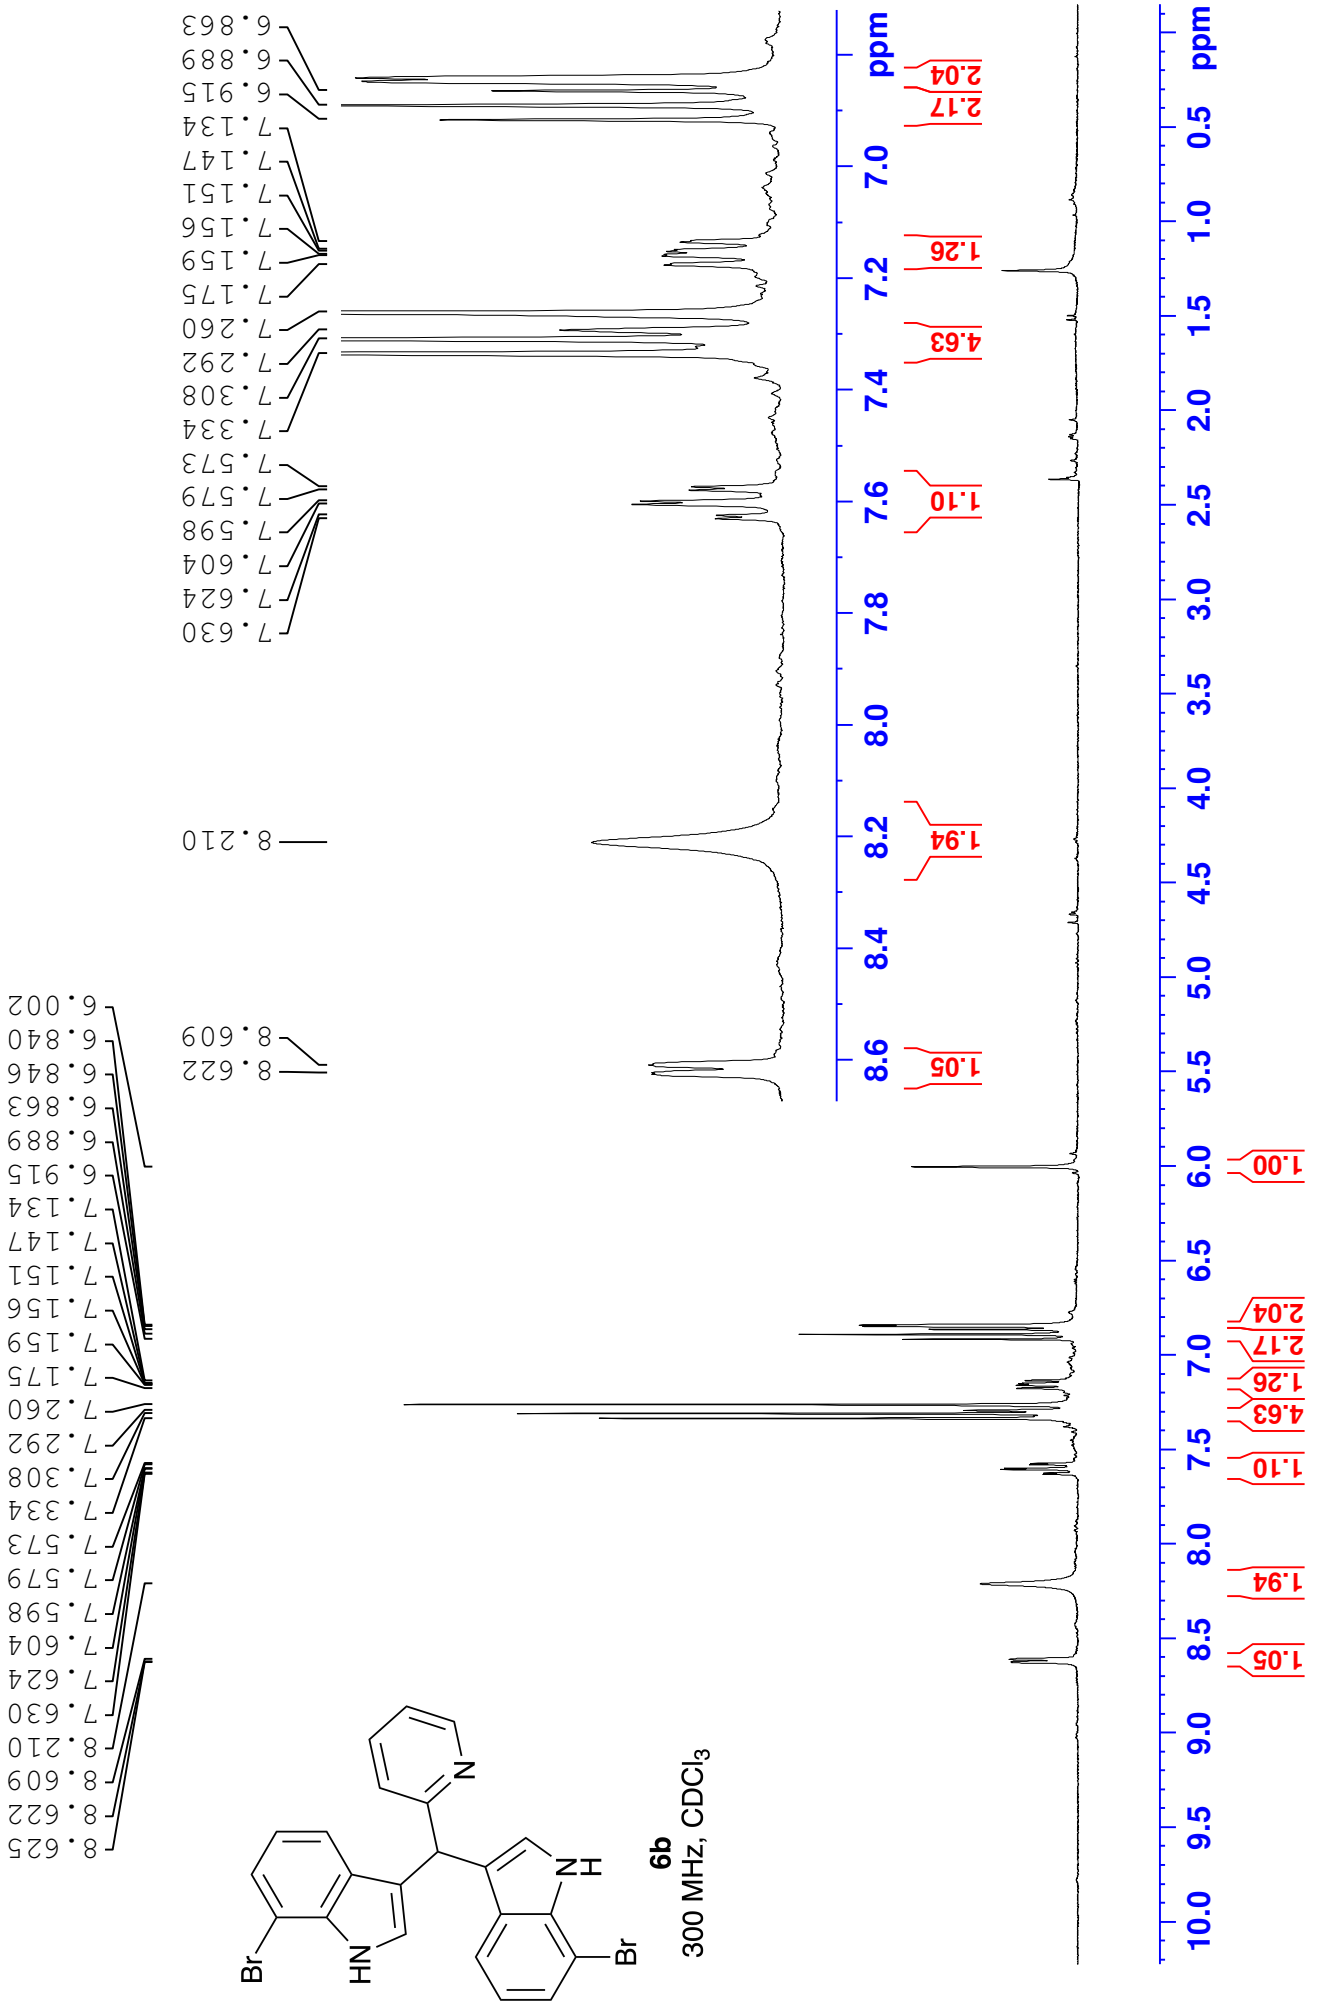



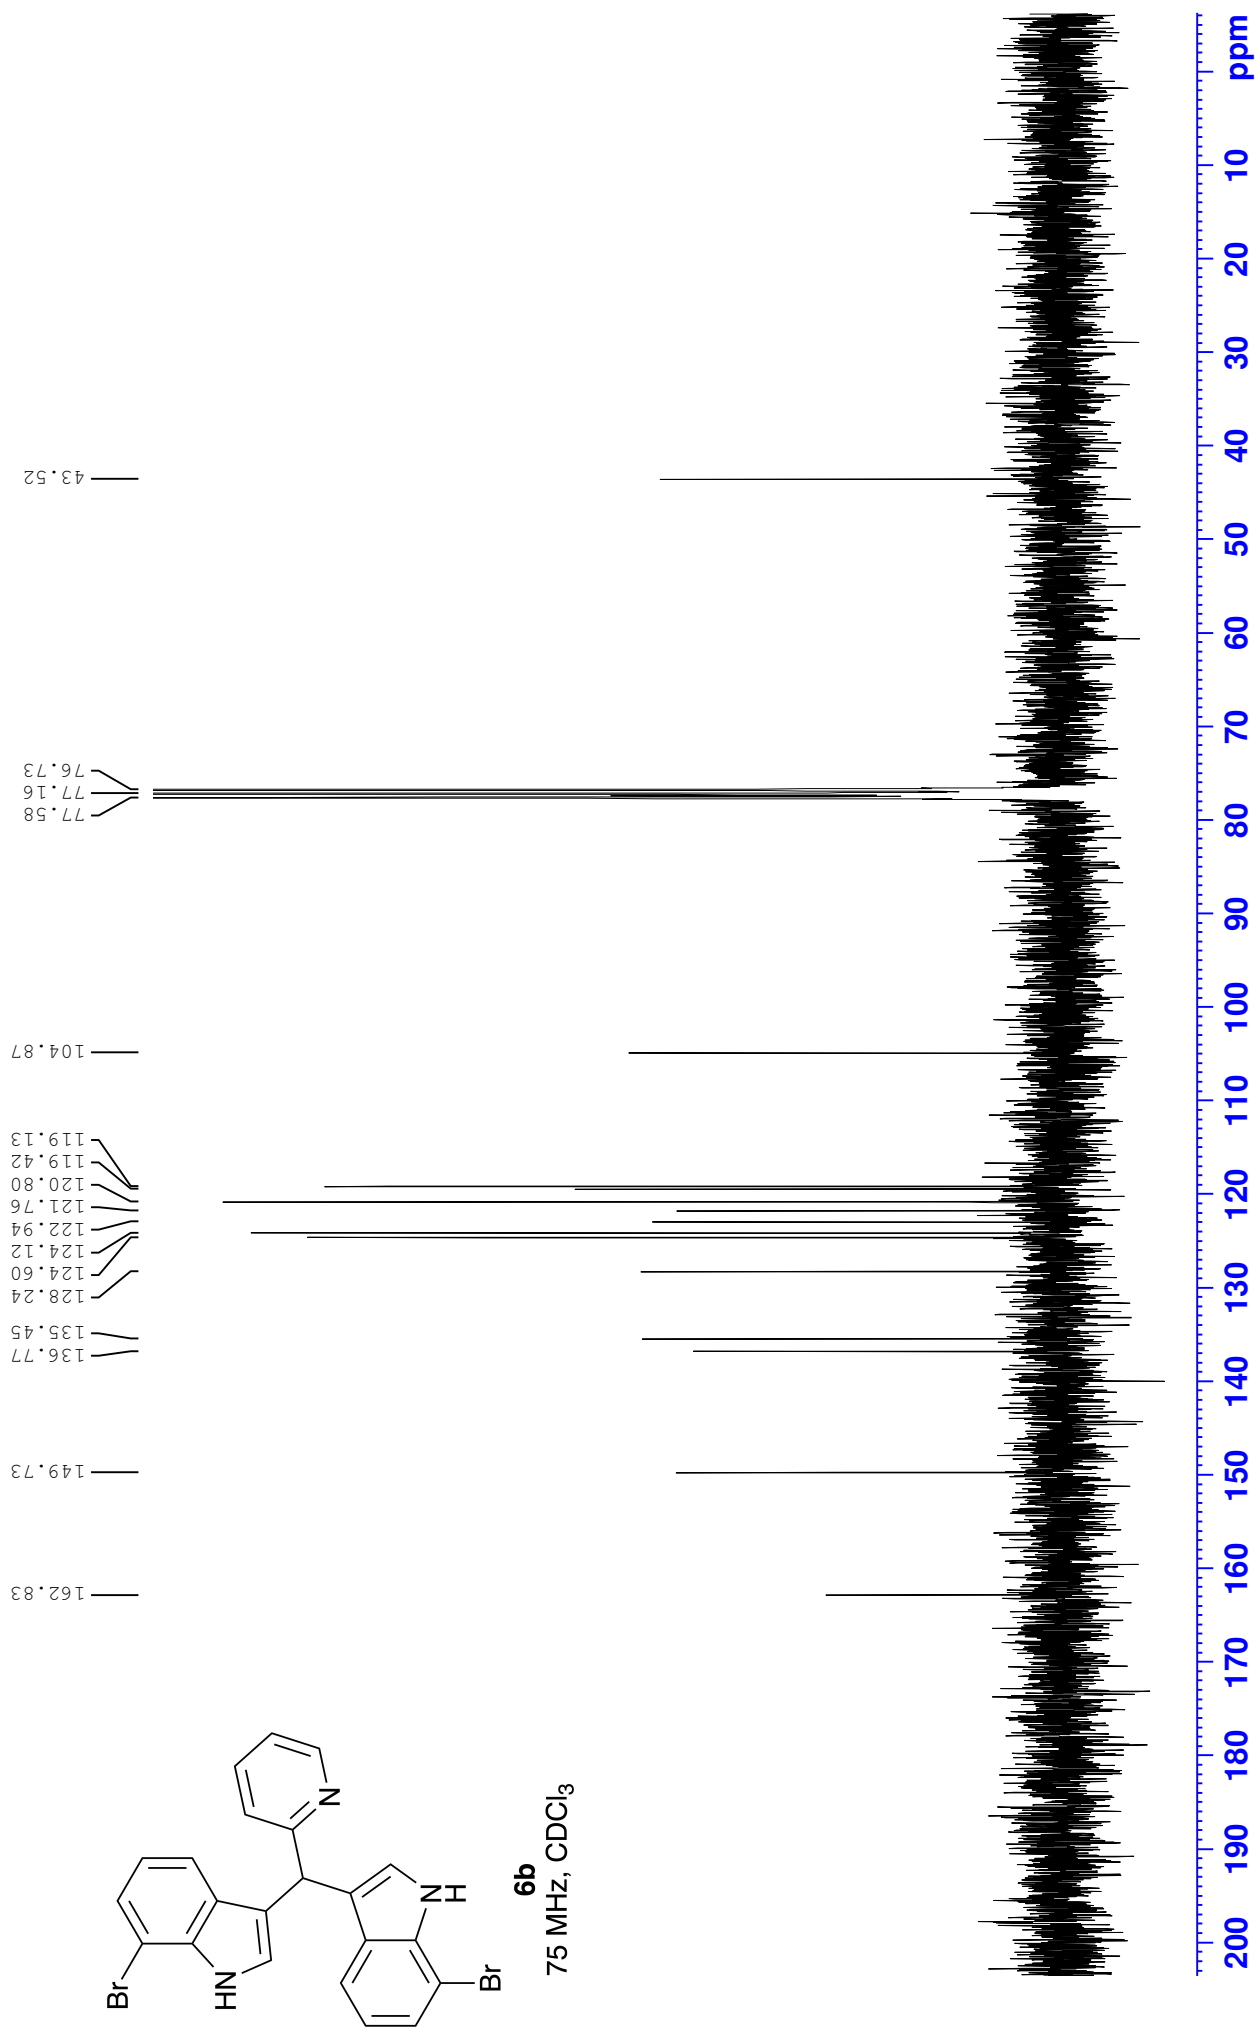

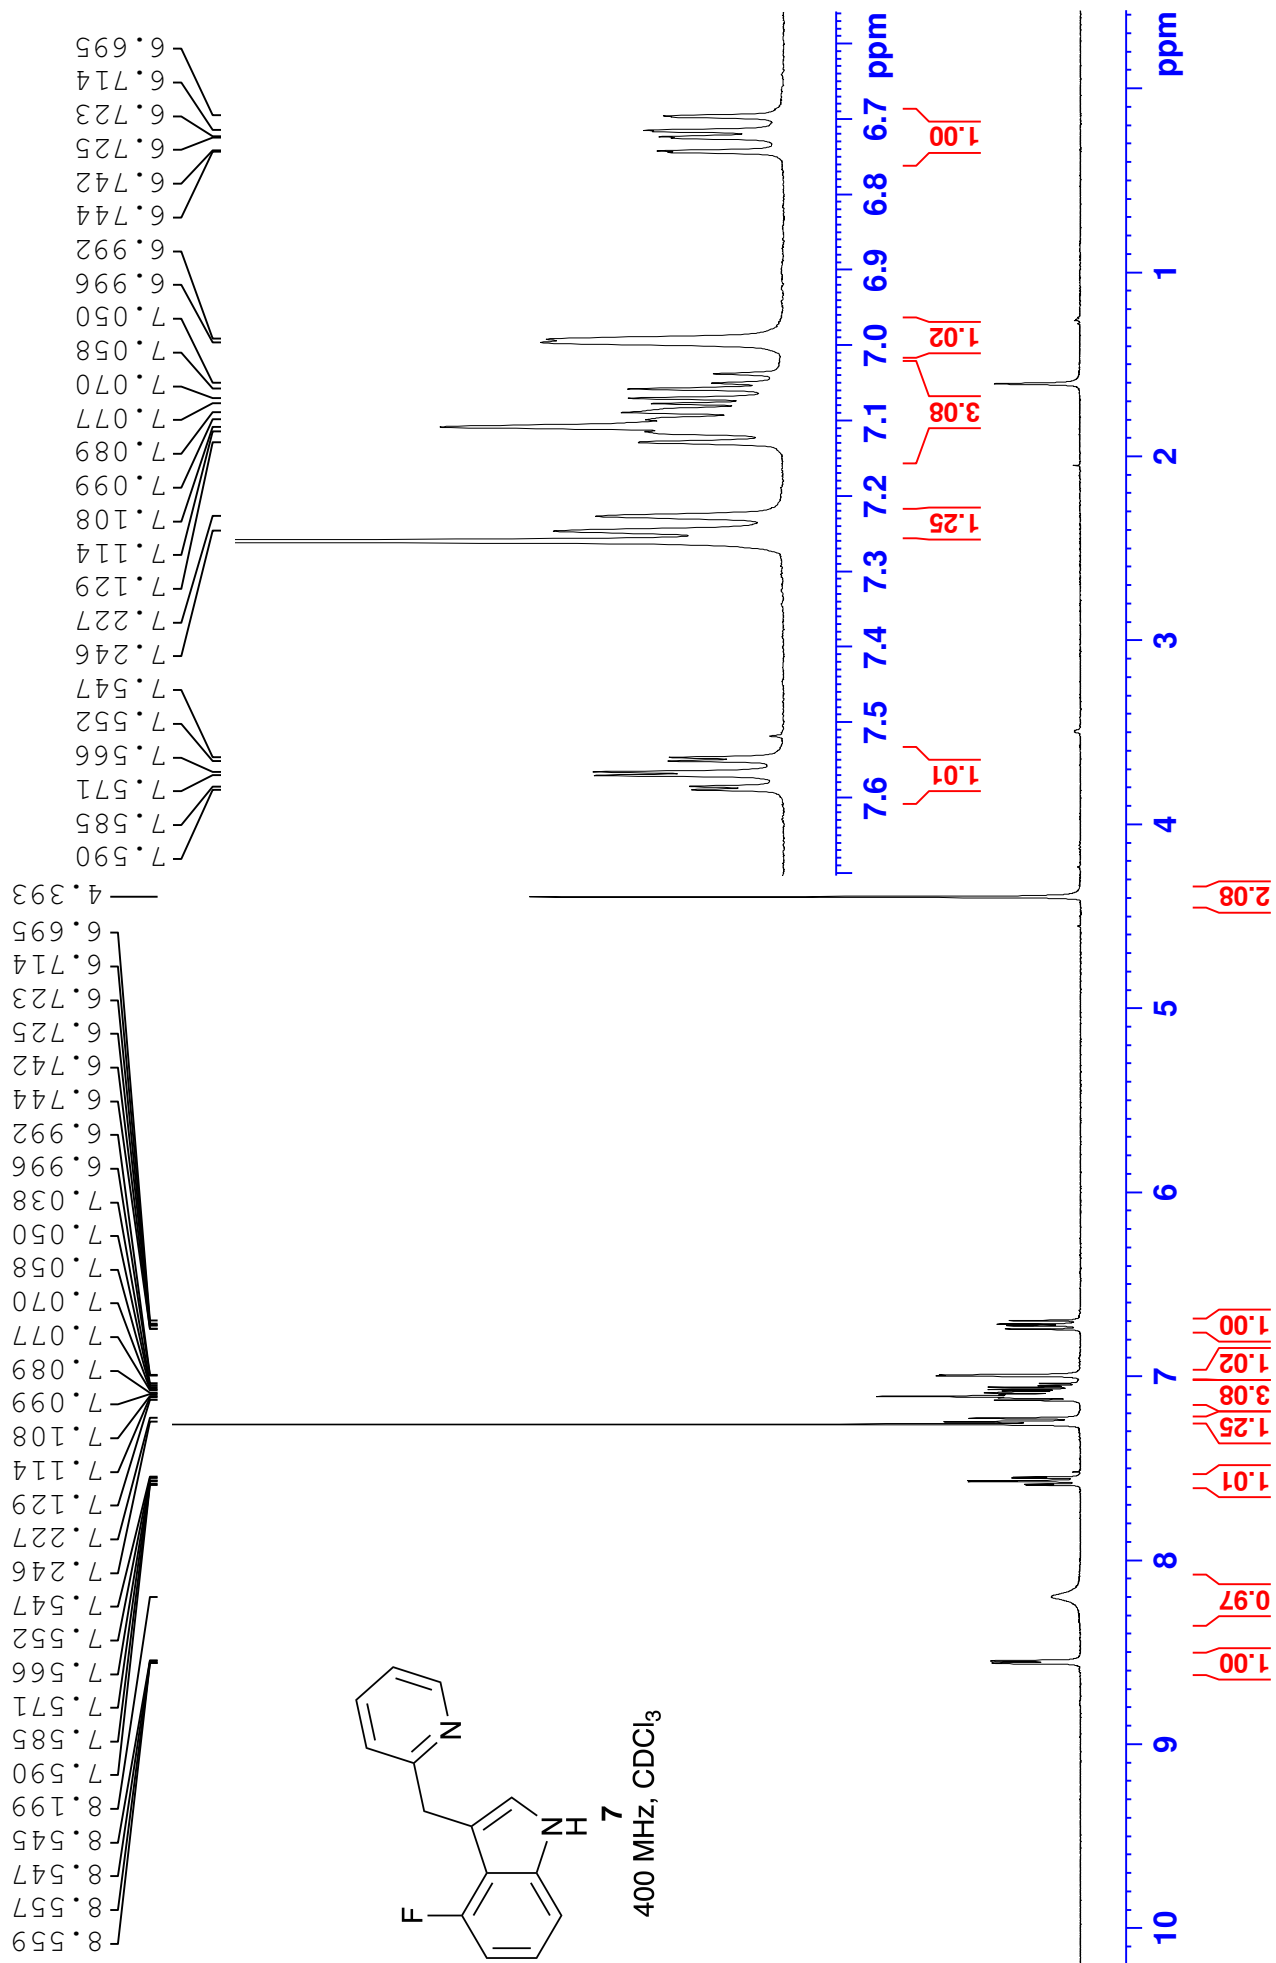

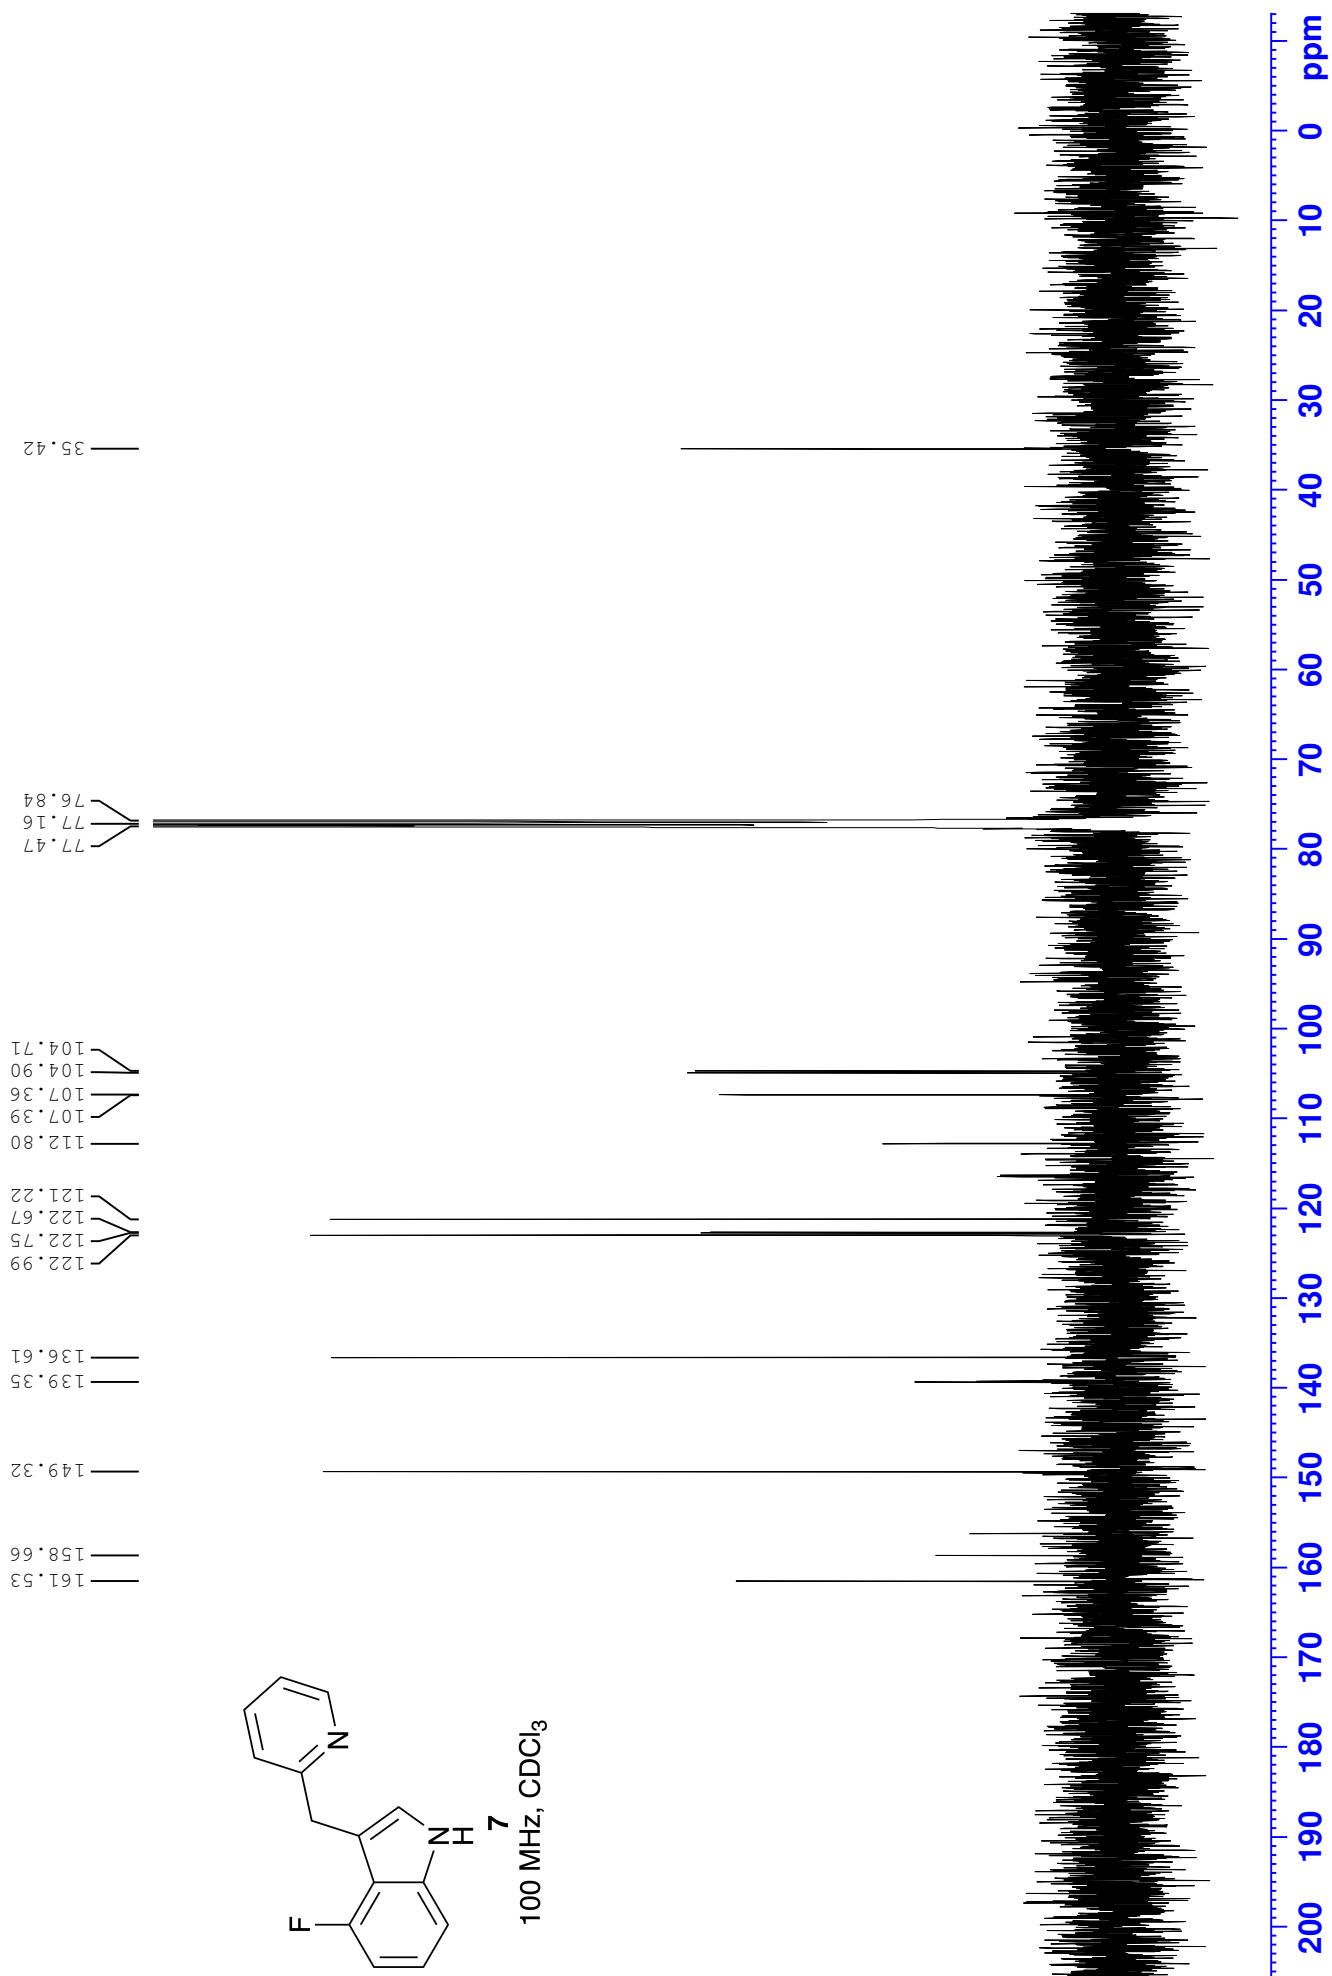

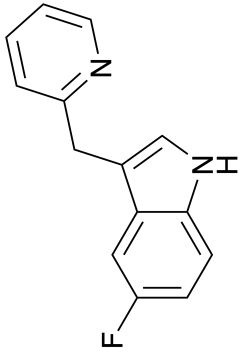

**8a**  
500 MHz, CDCl<sub>3</sub>

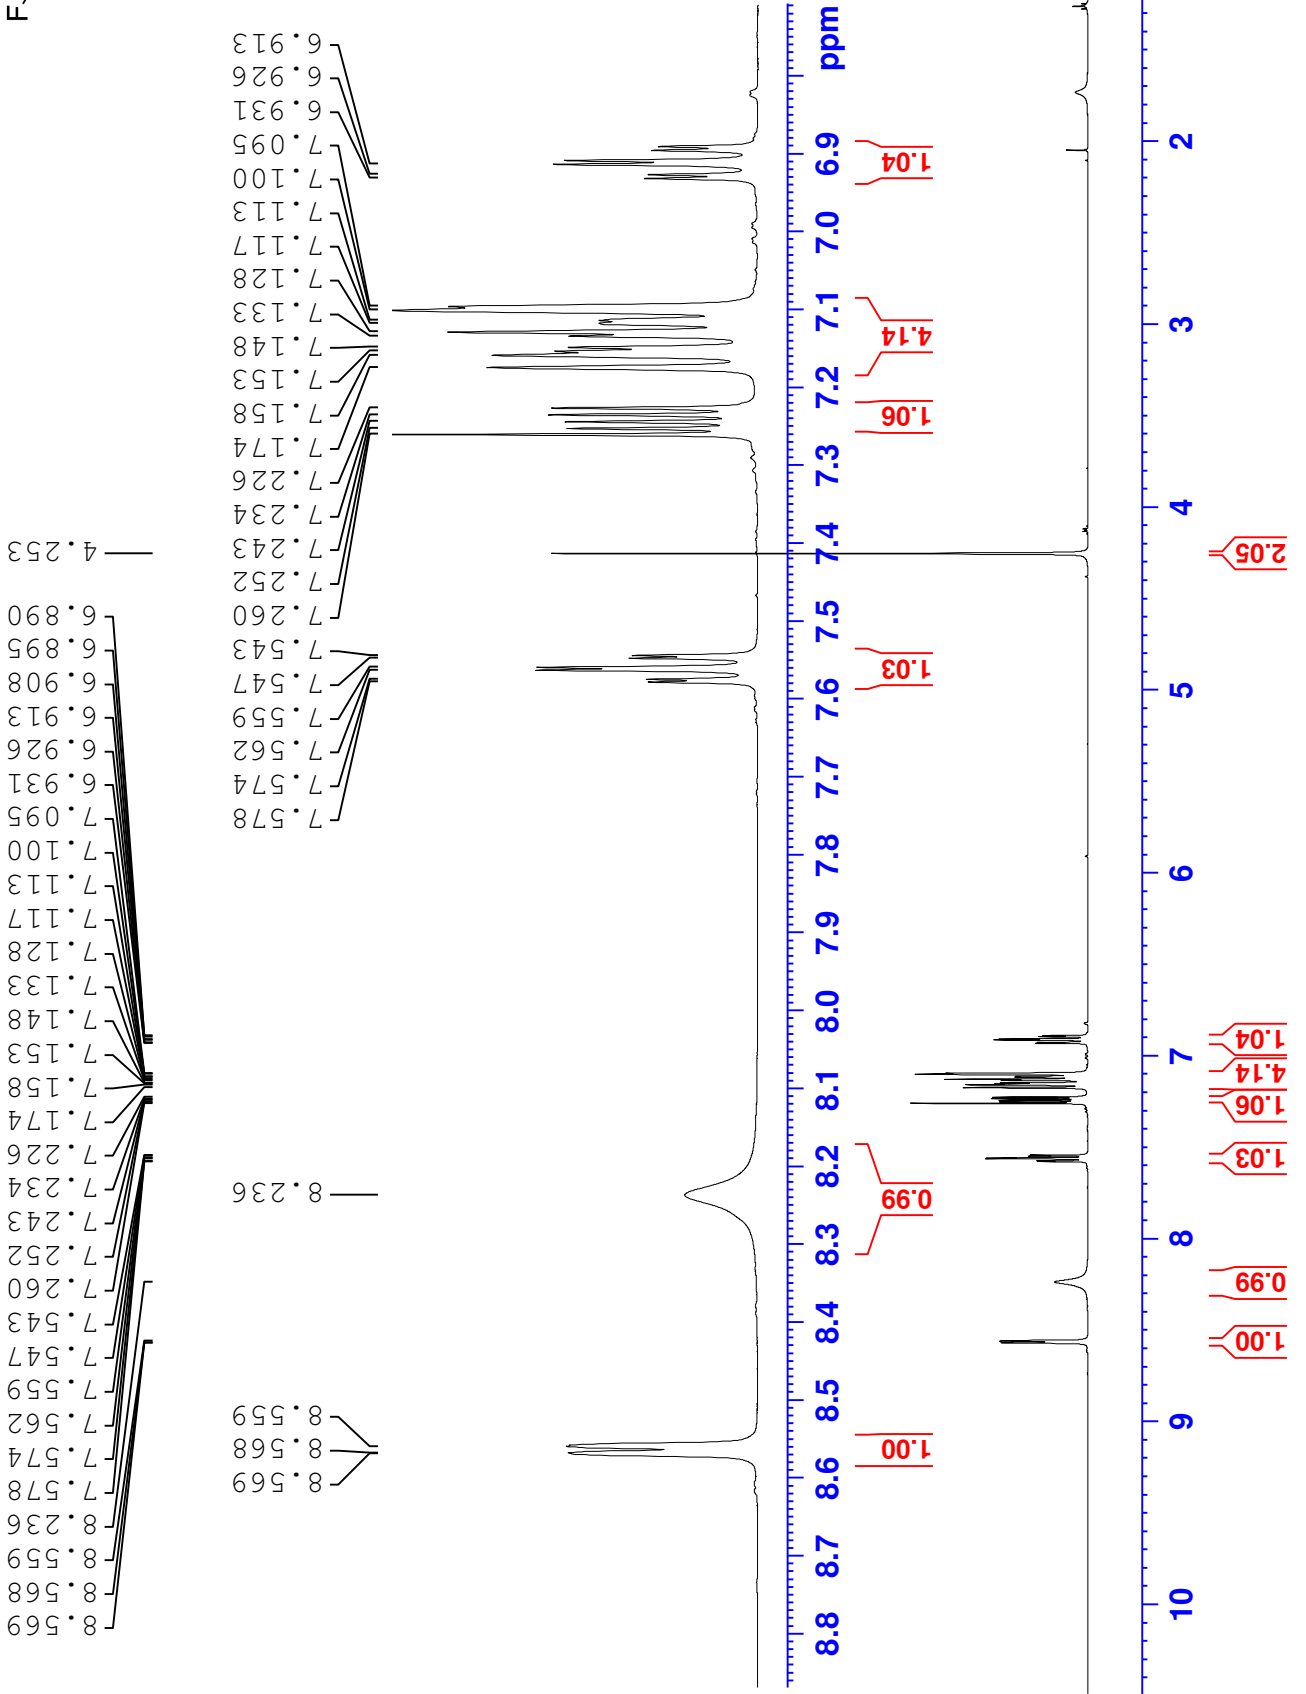

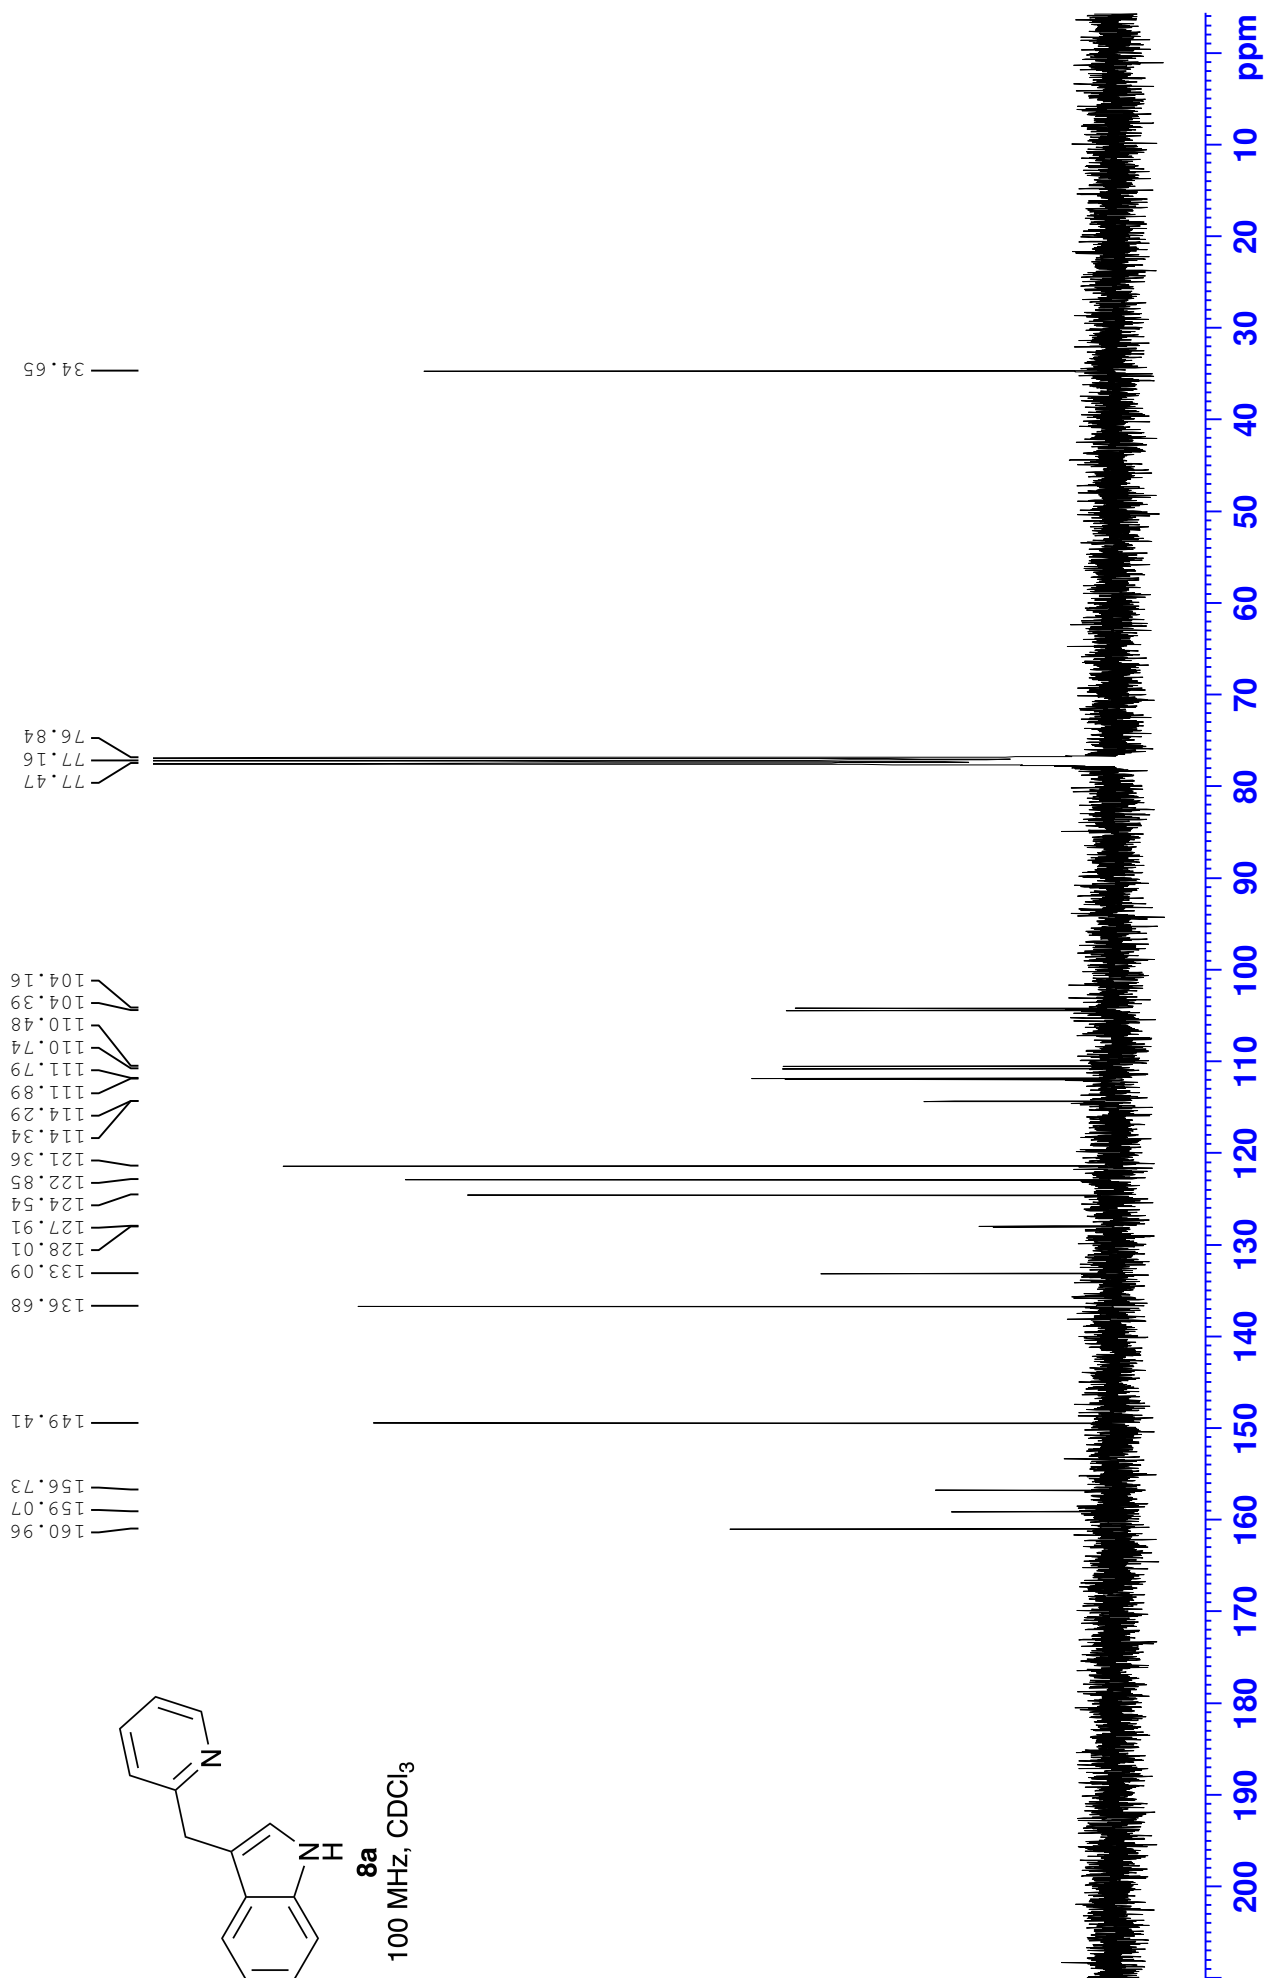

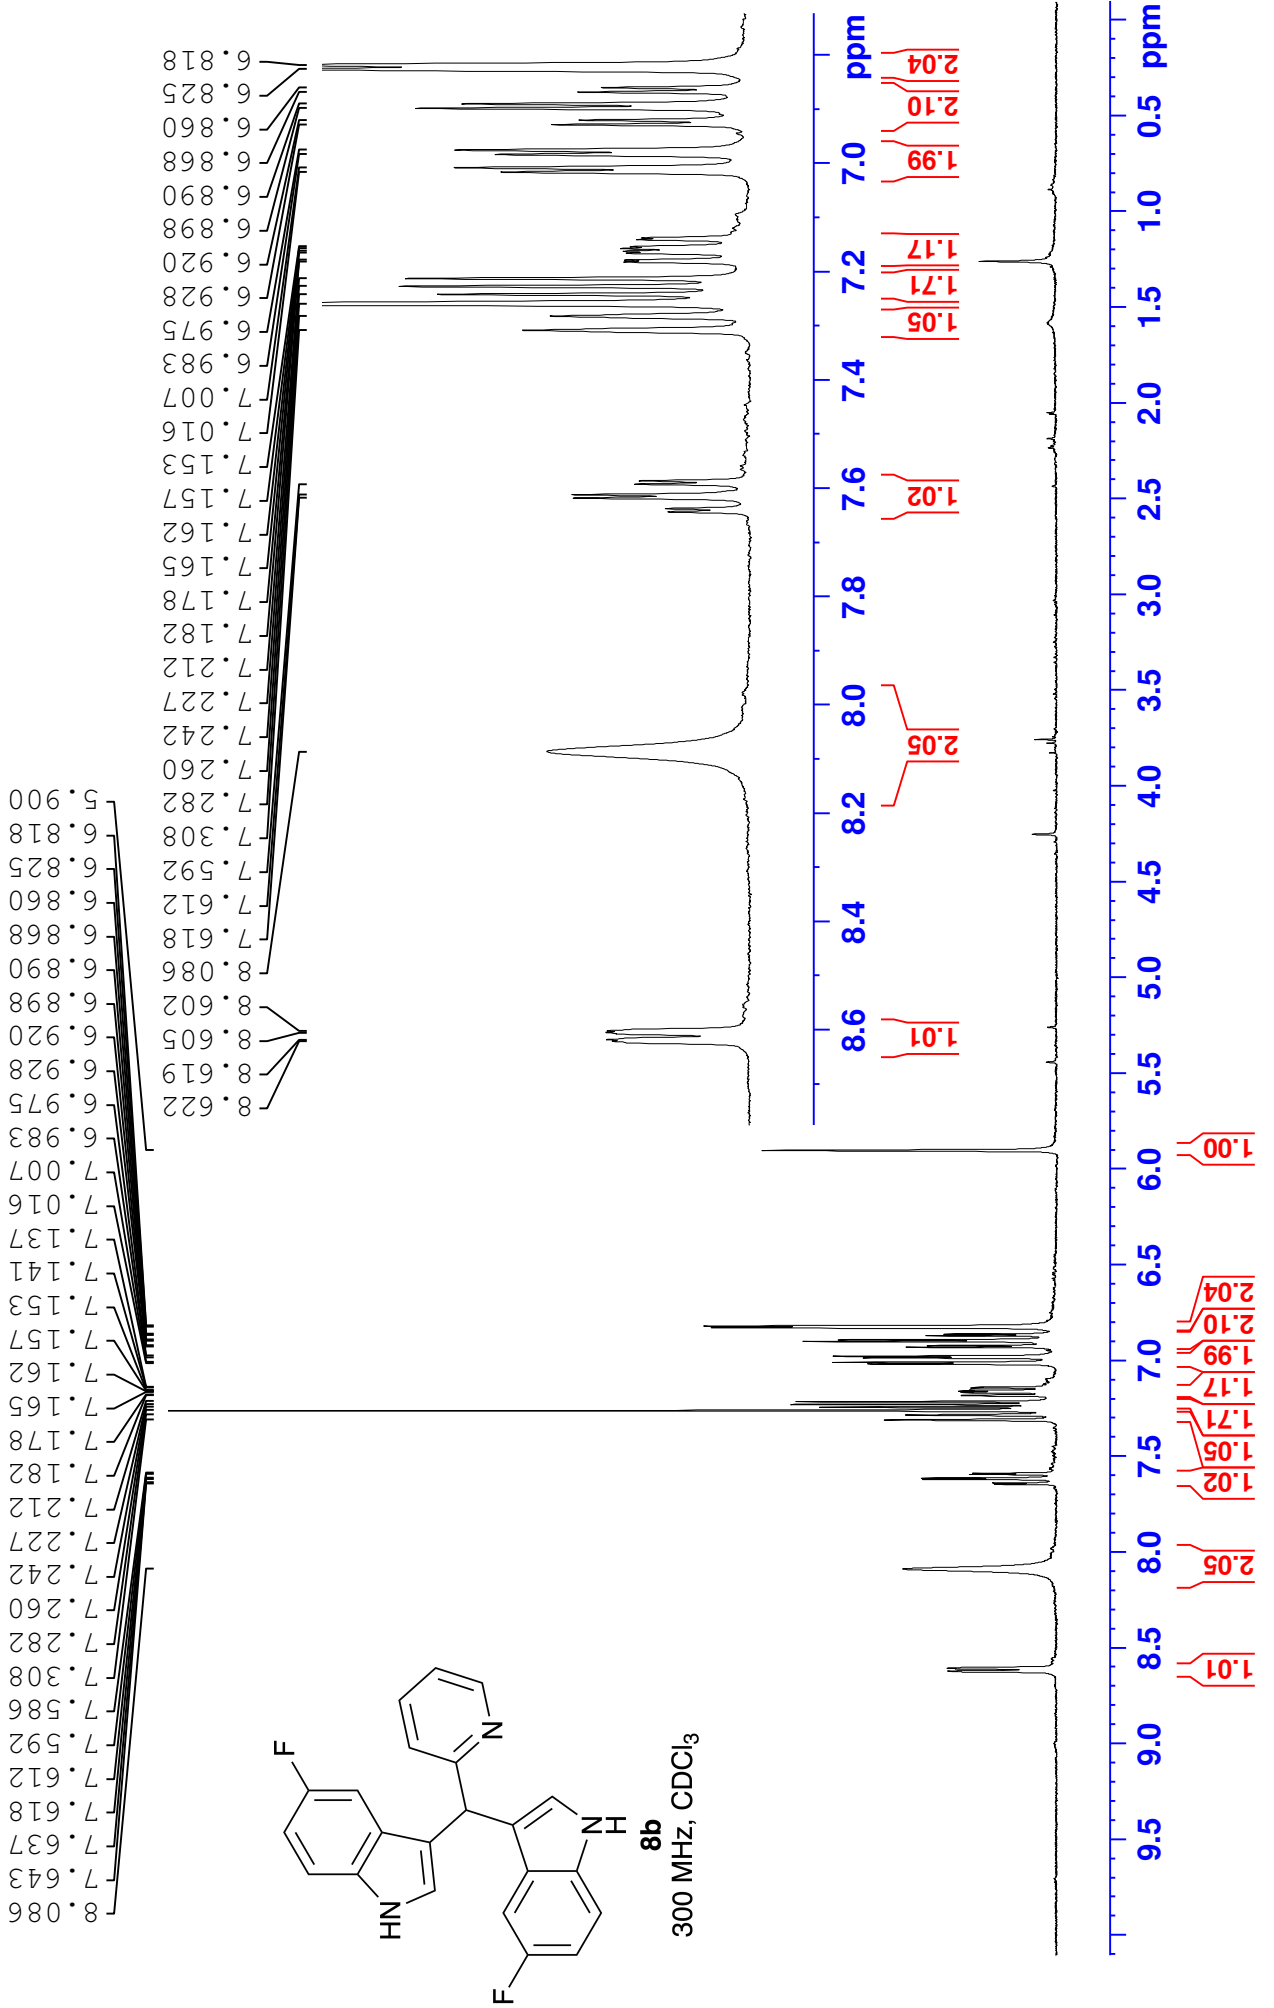

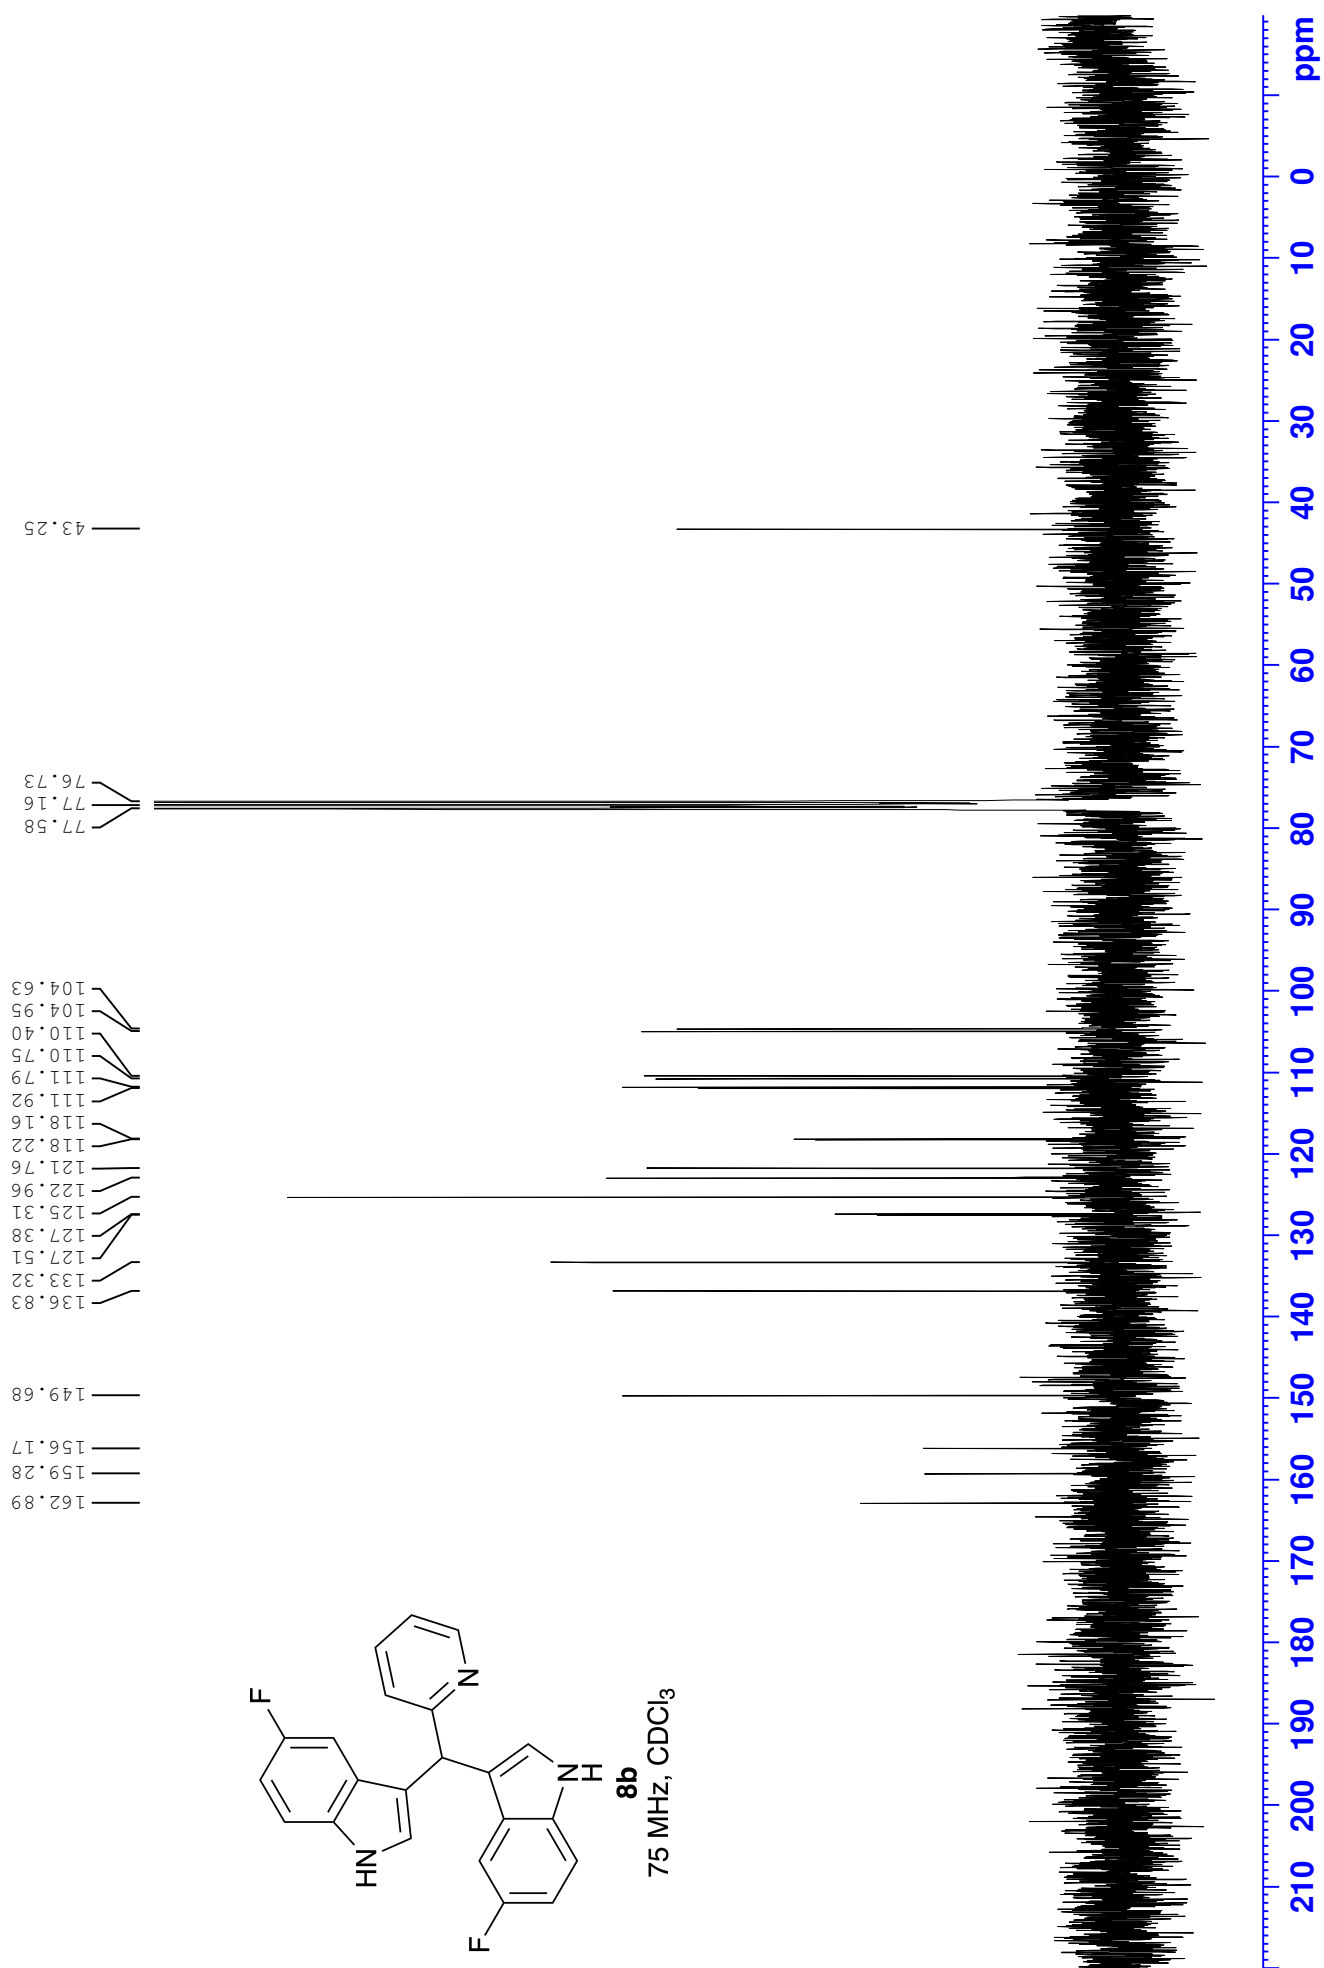

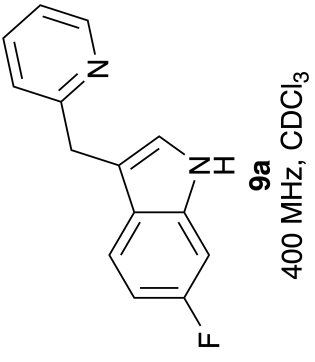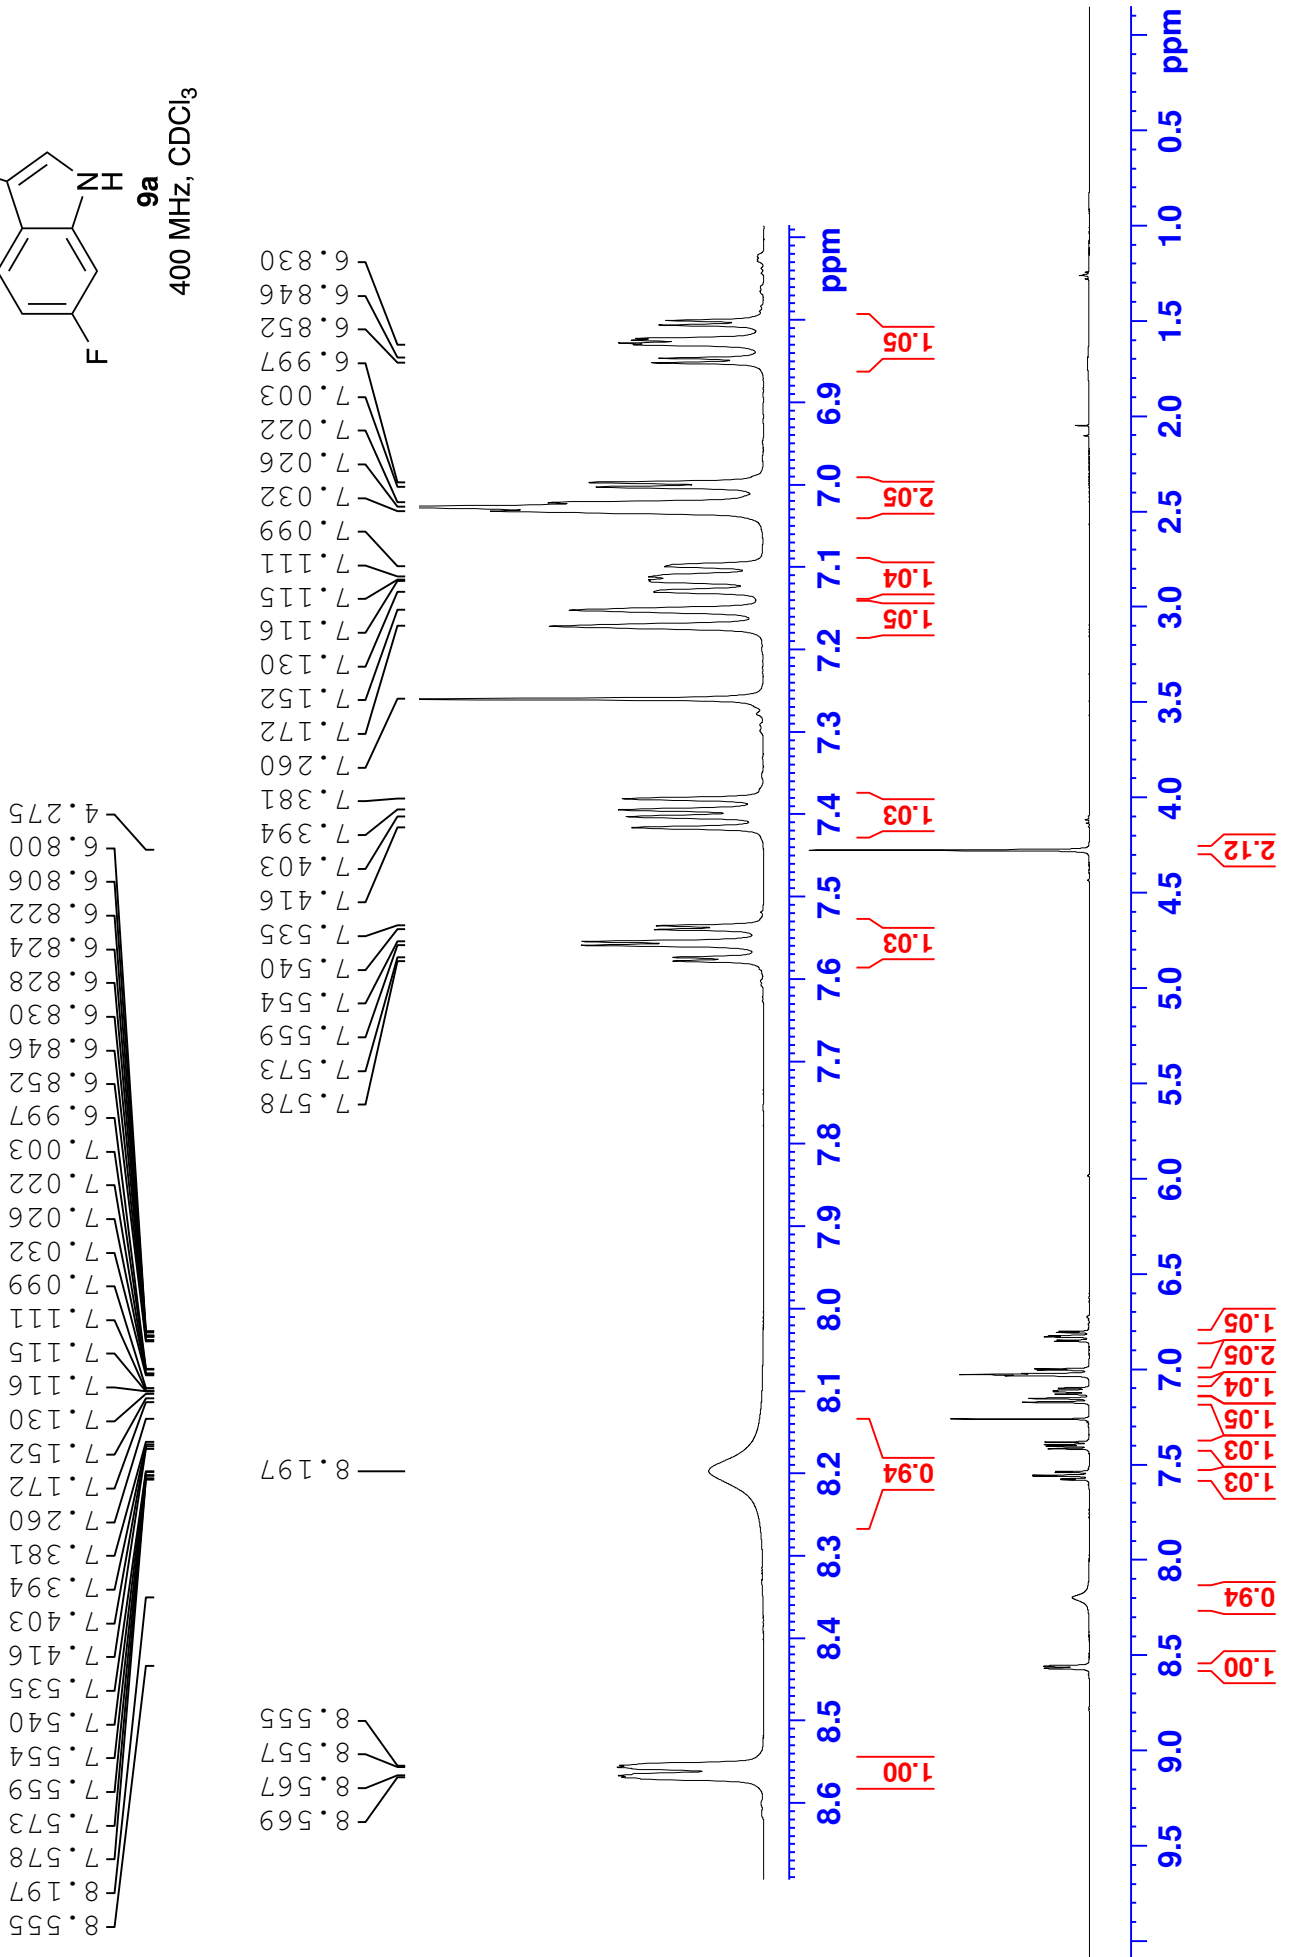



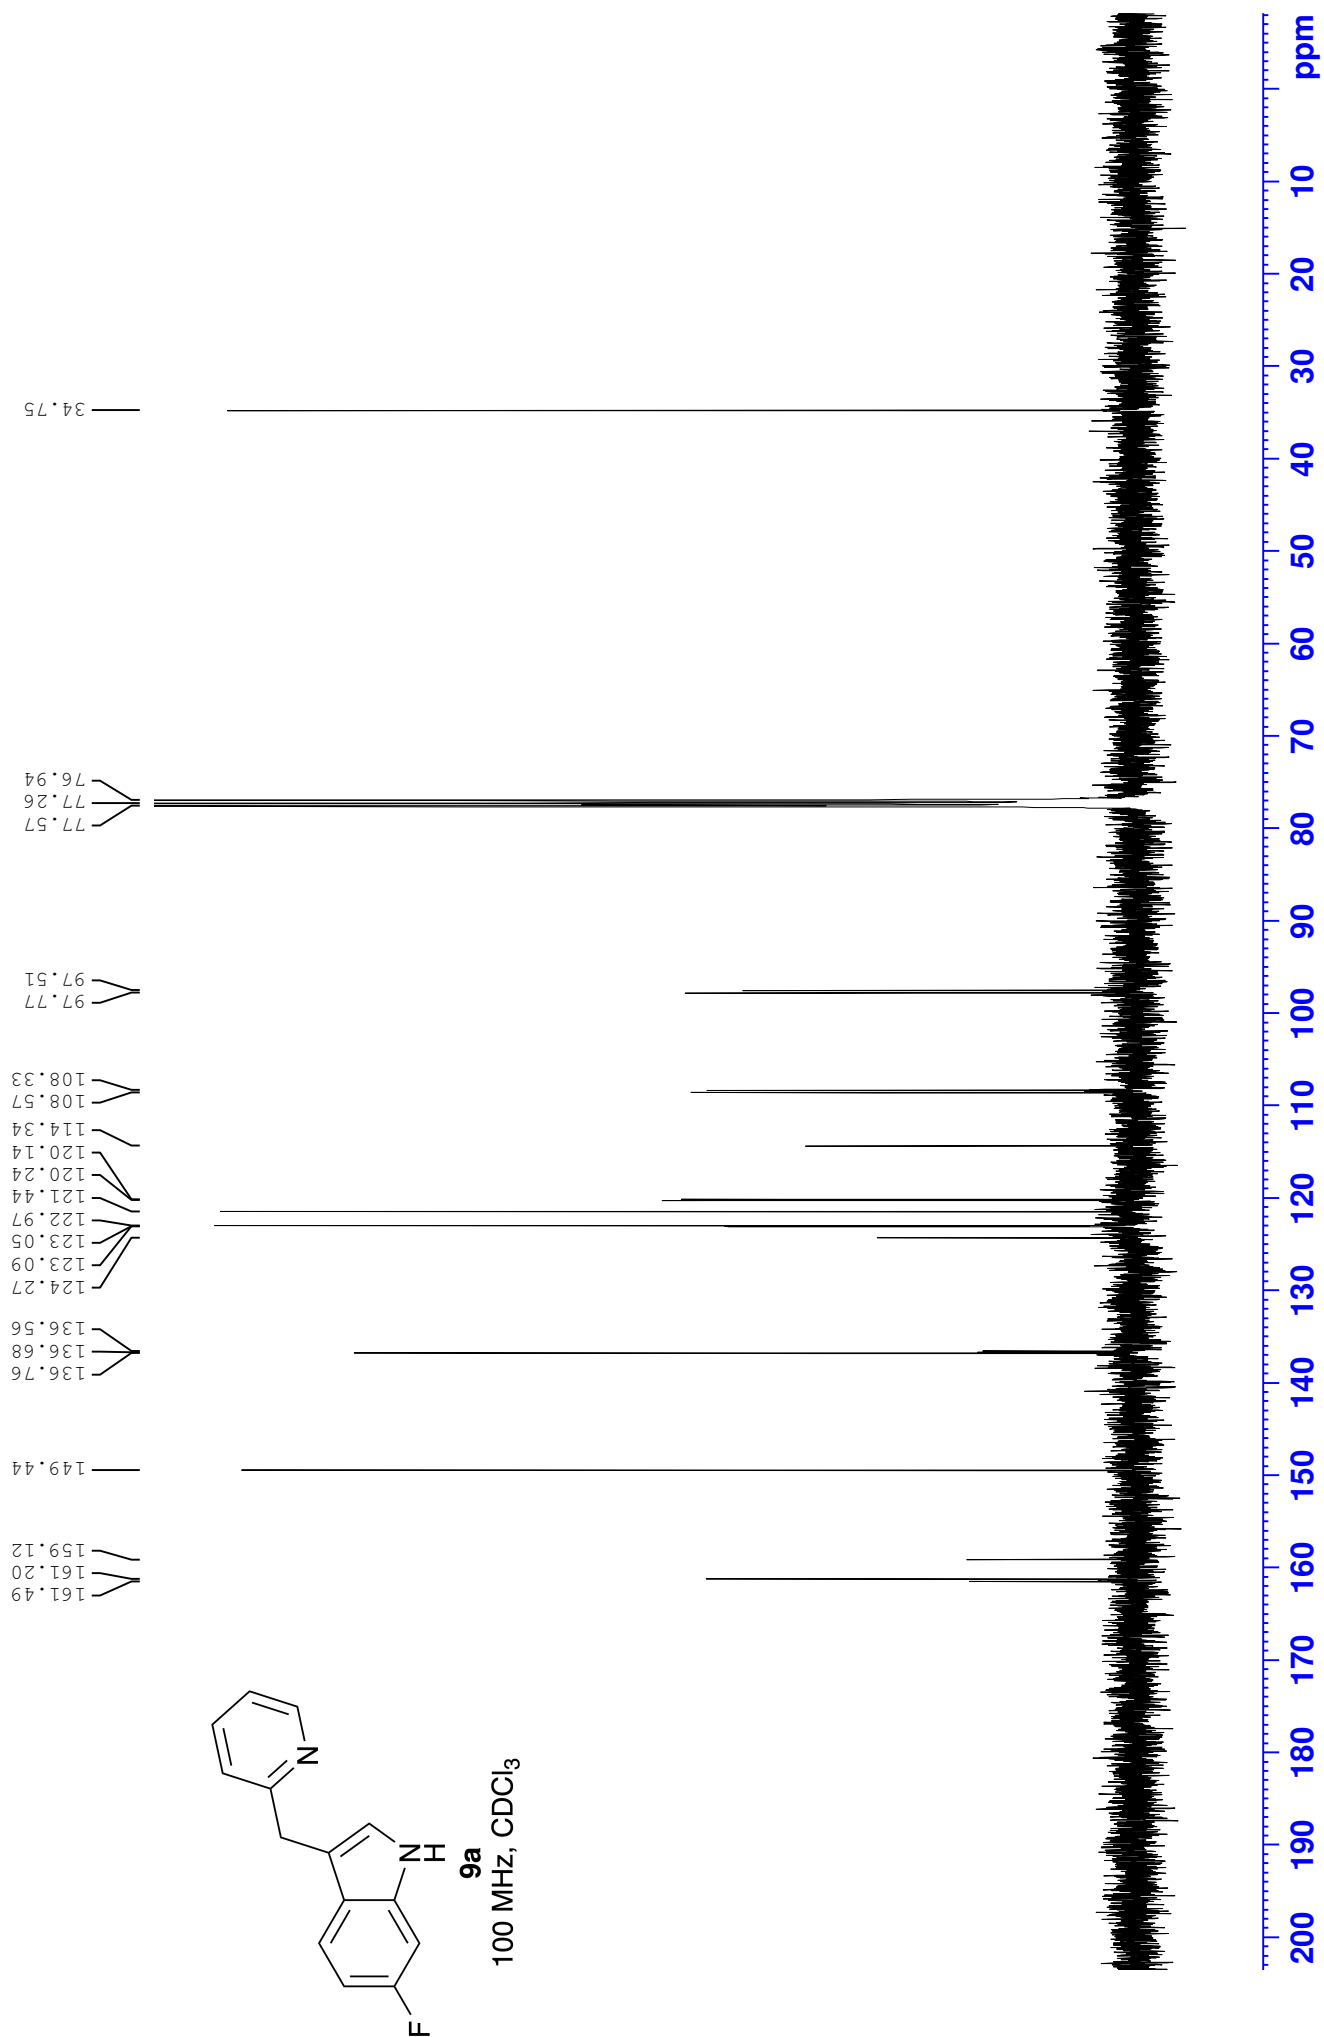

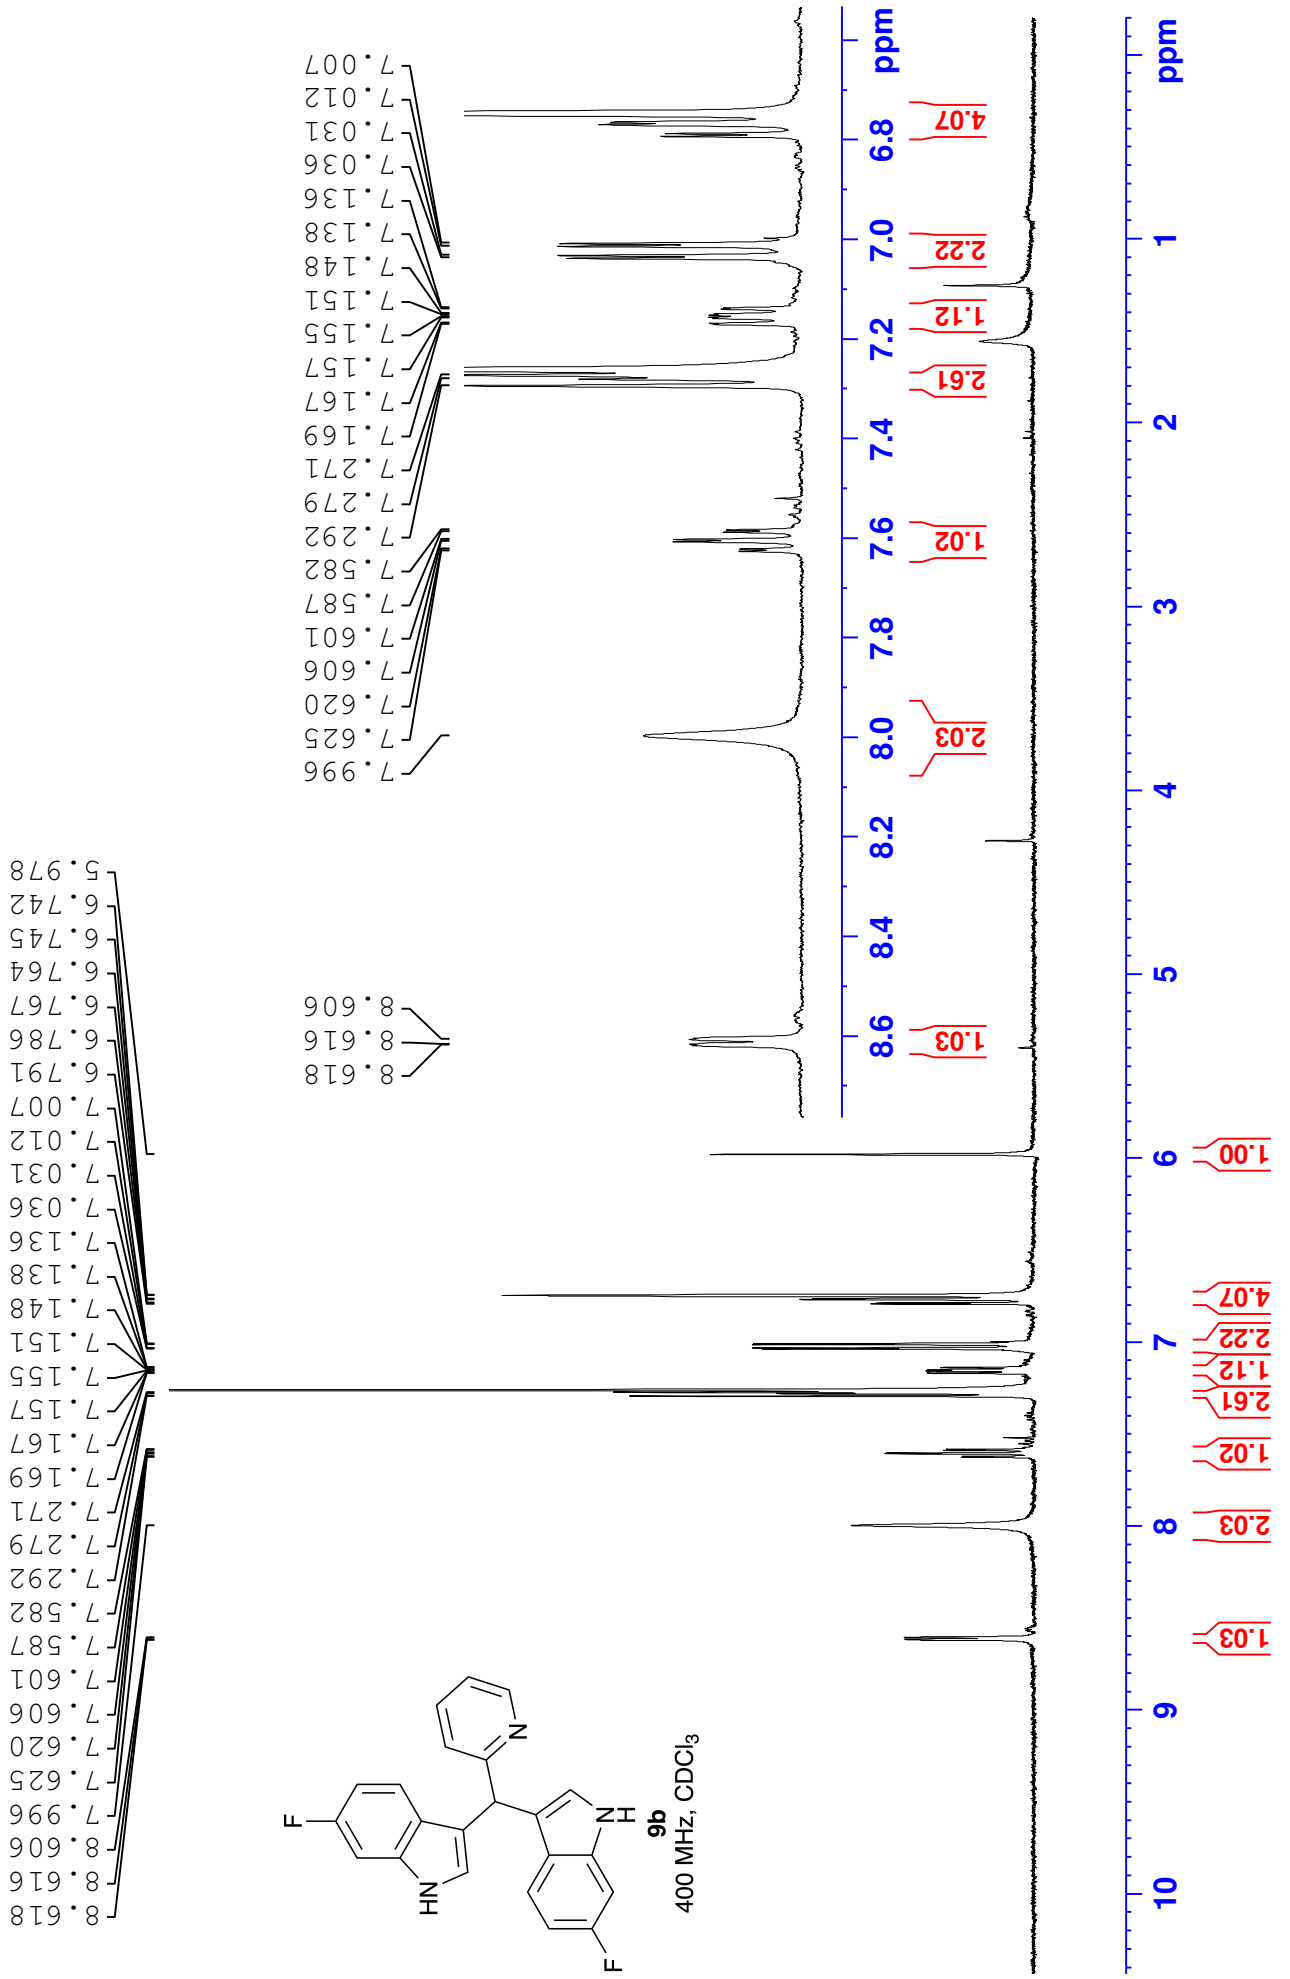

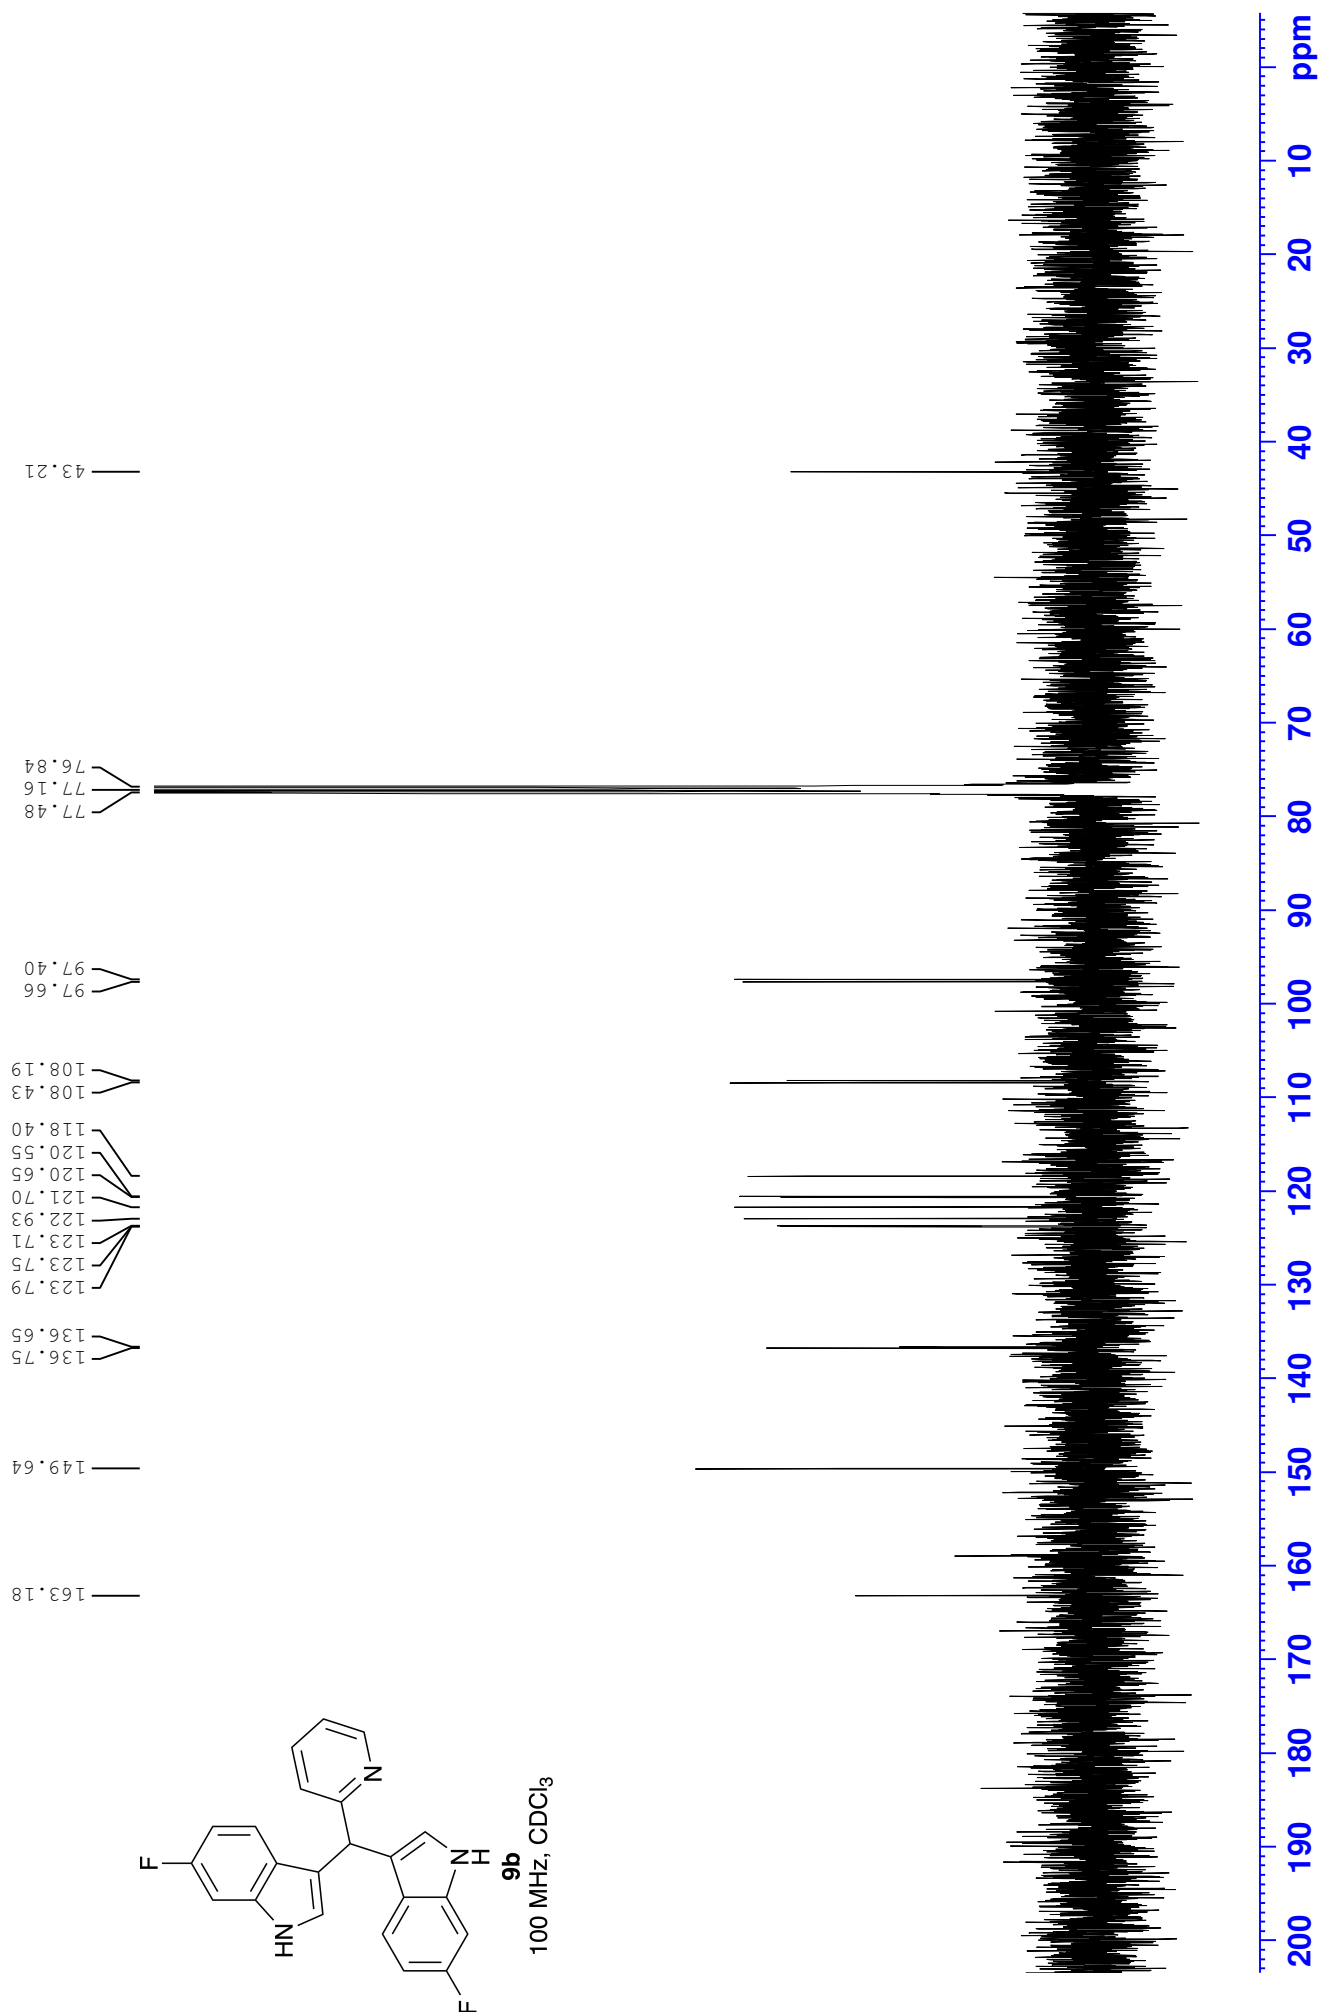

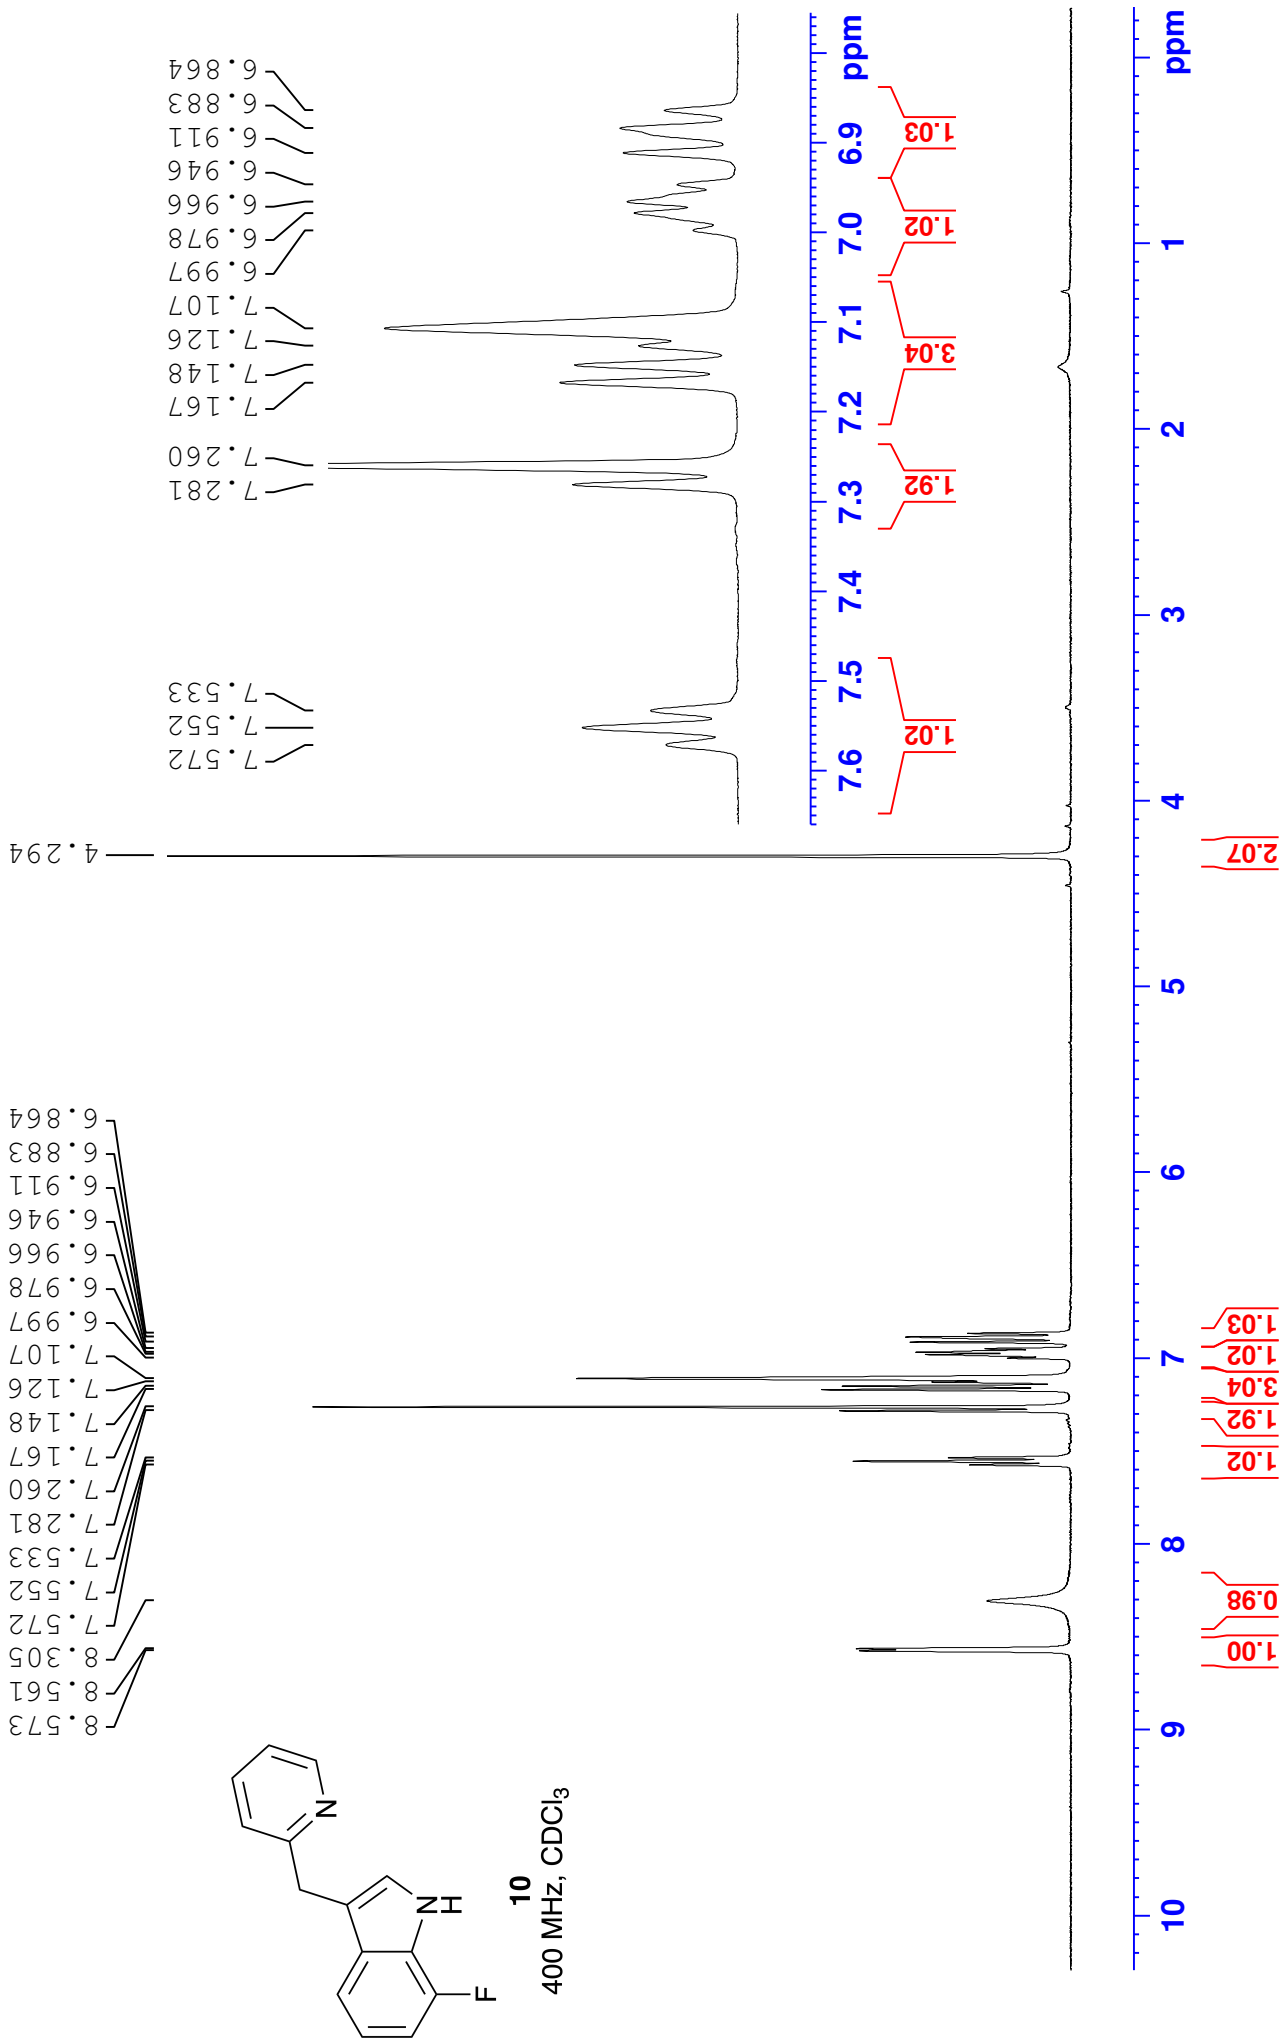

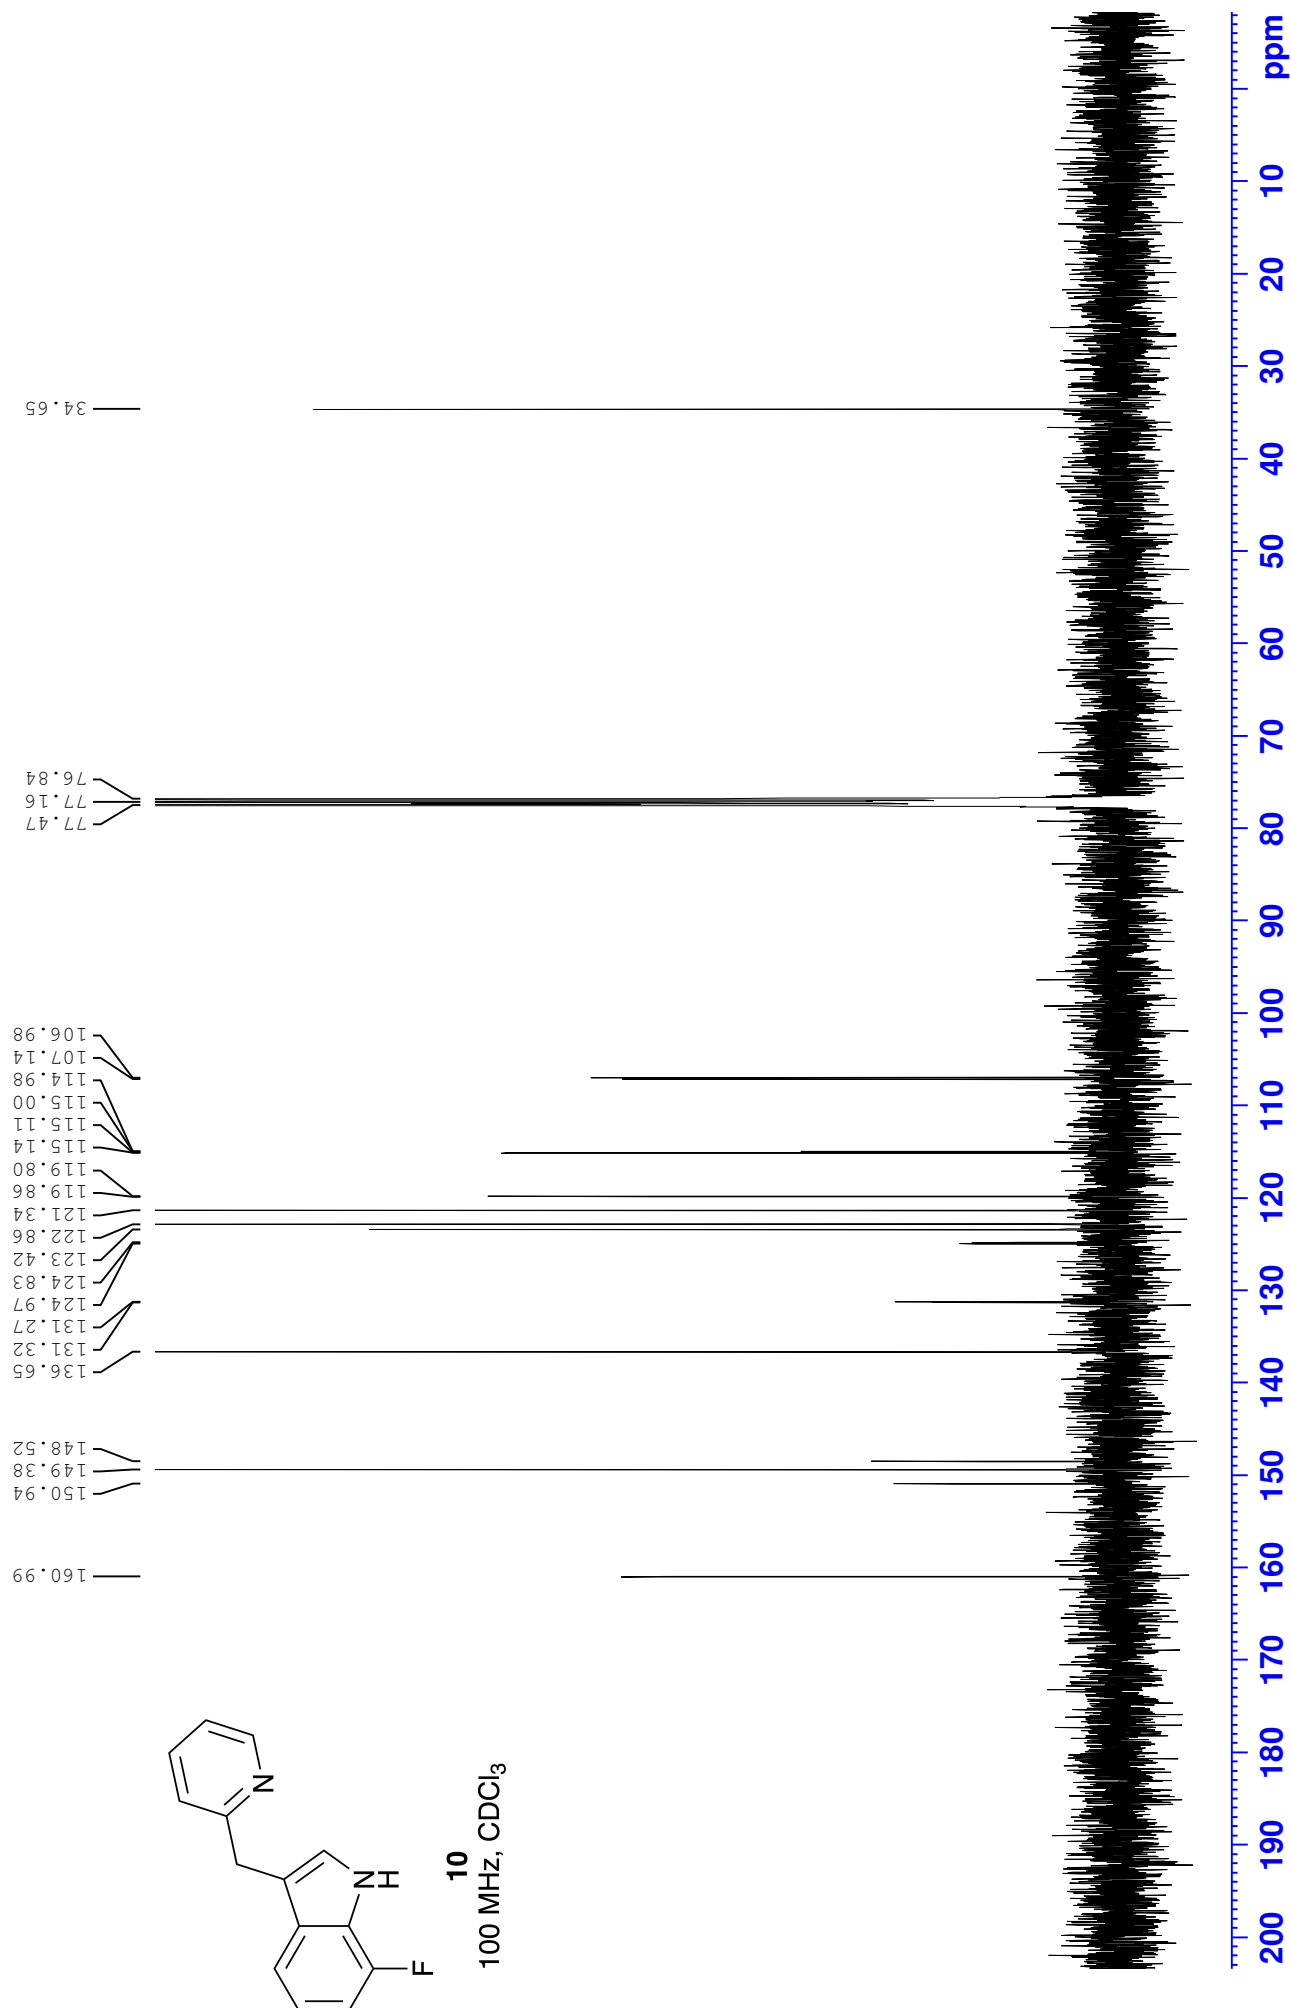

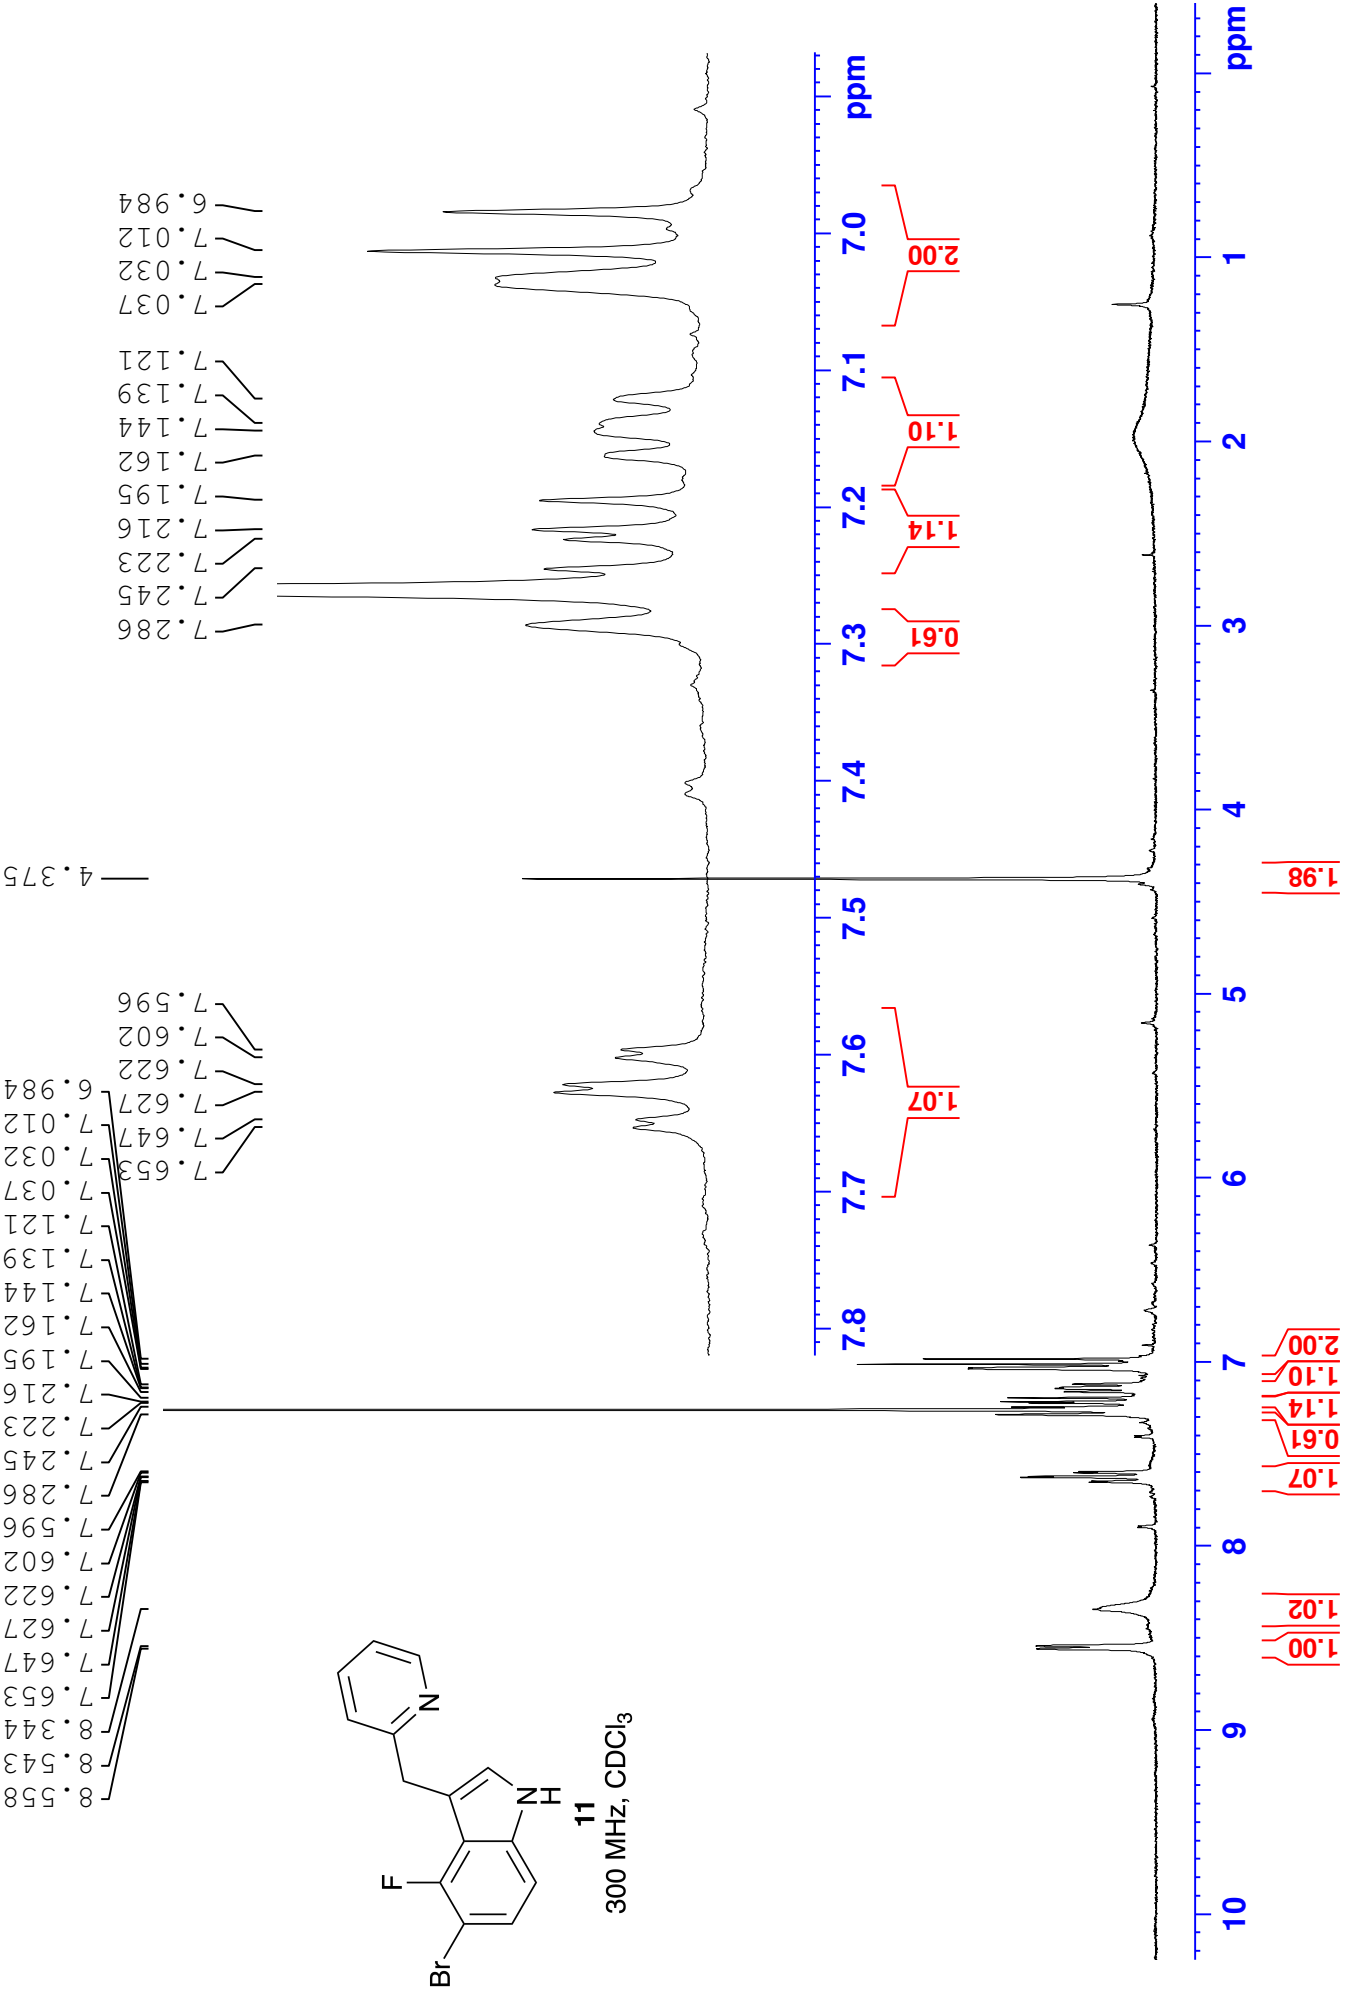

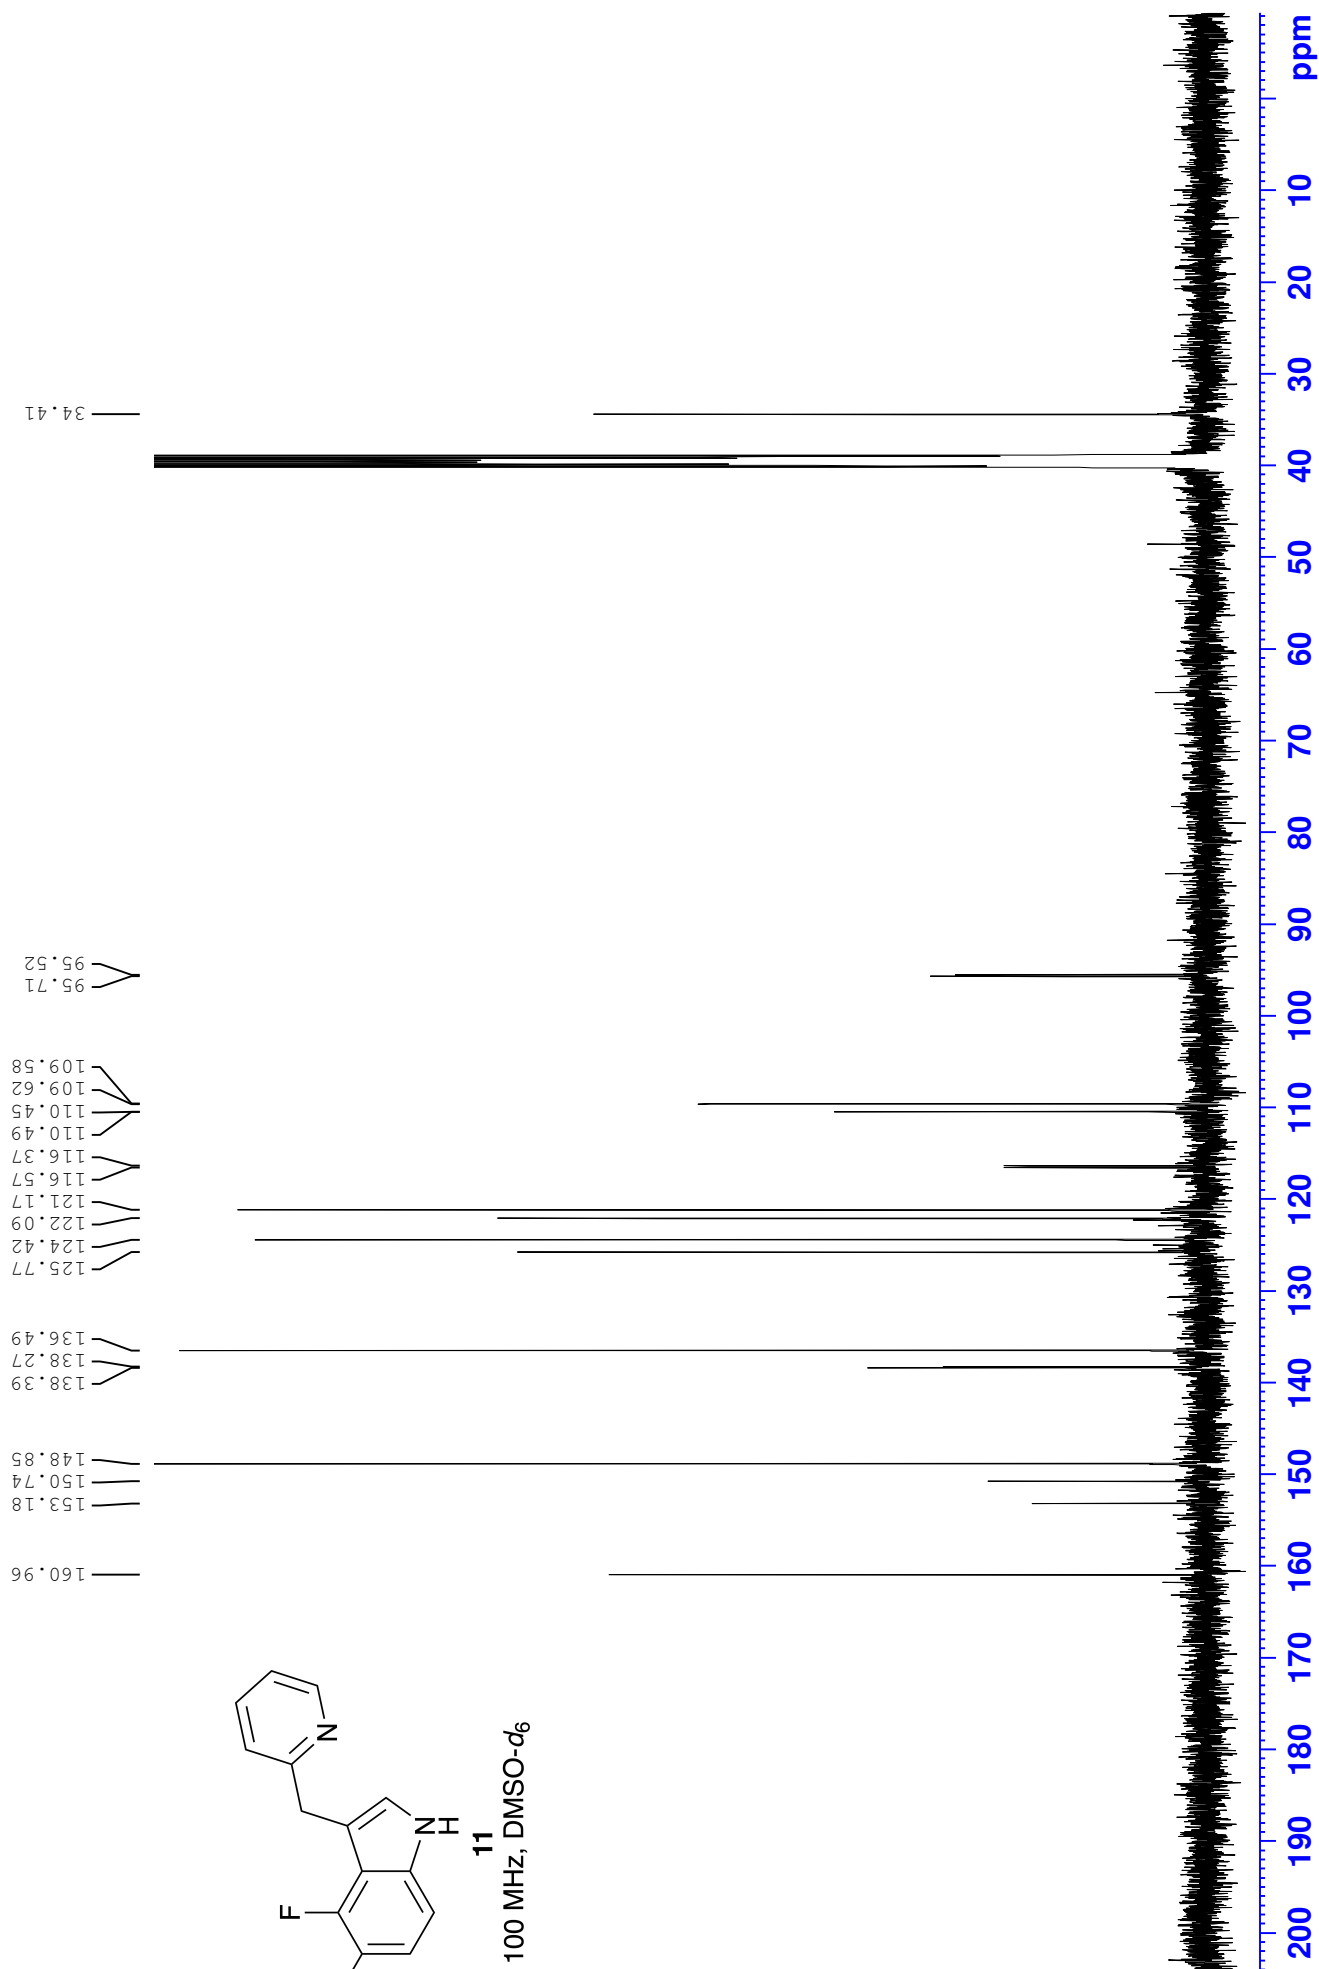

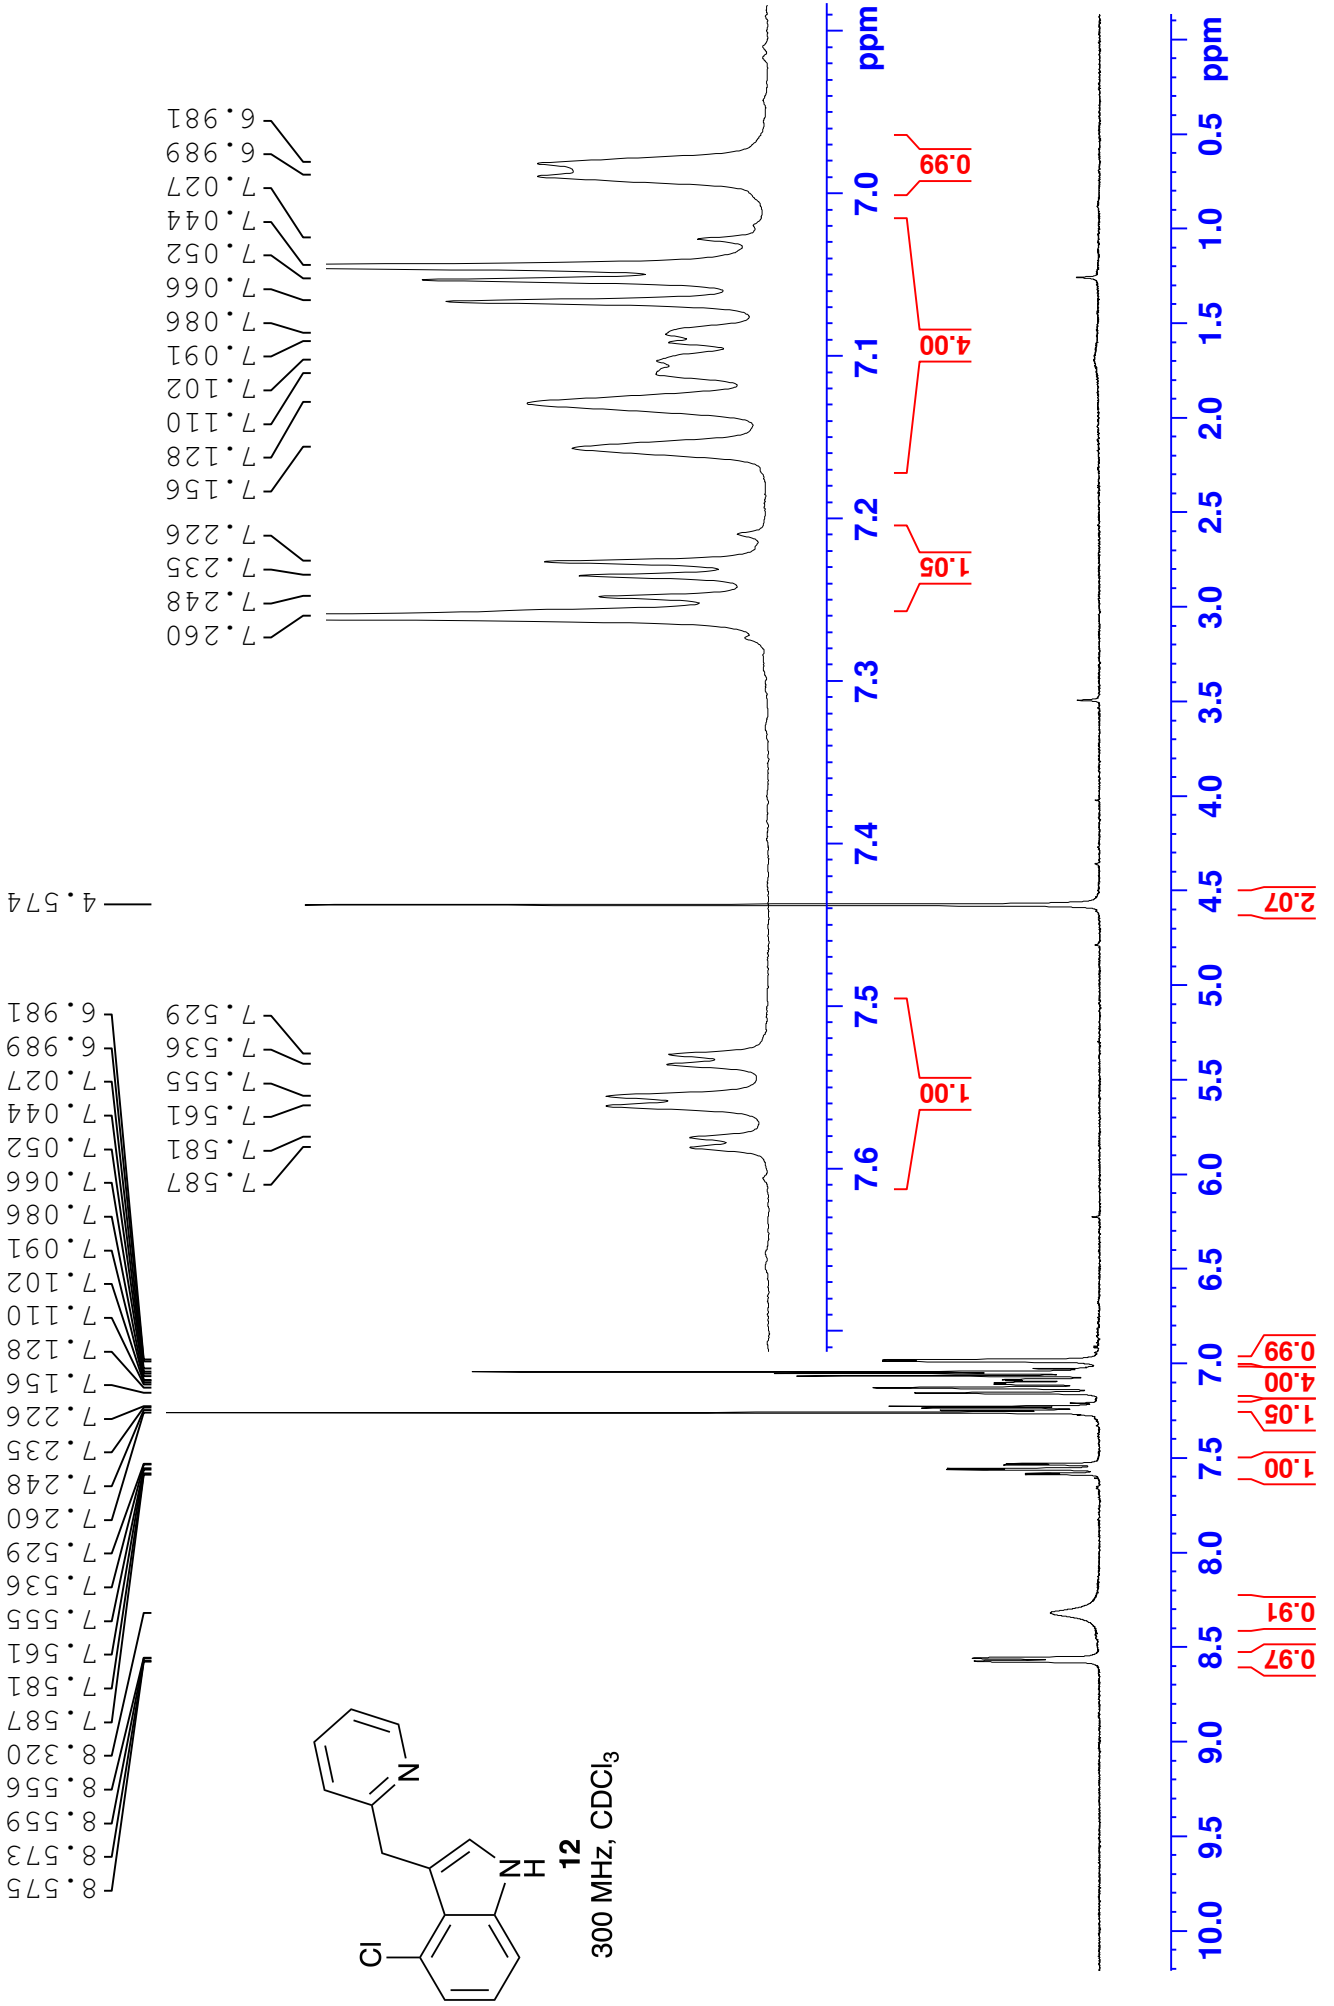



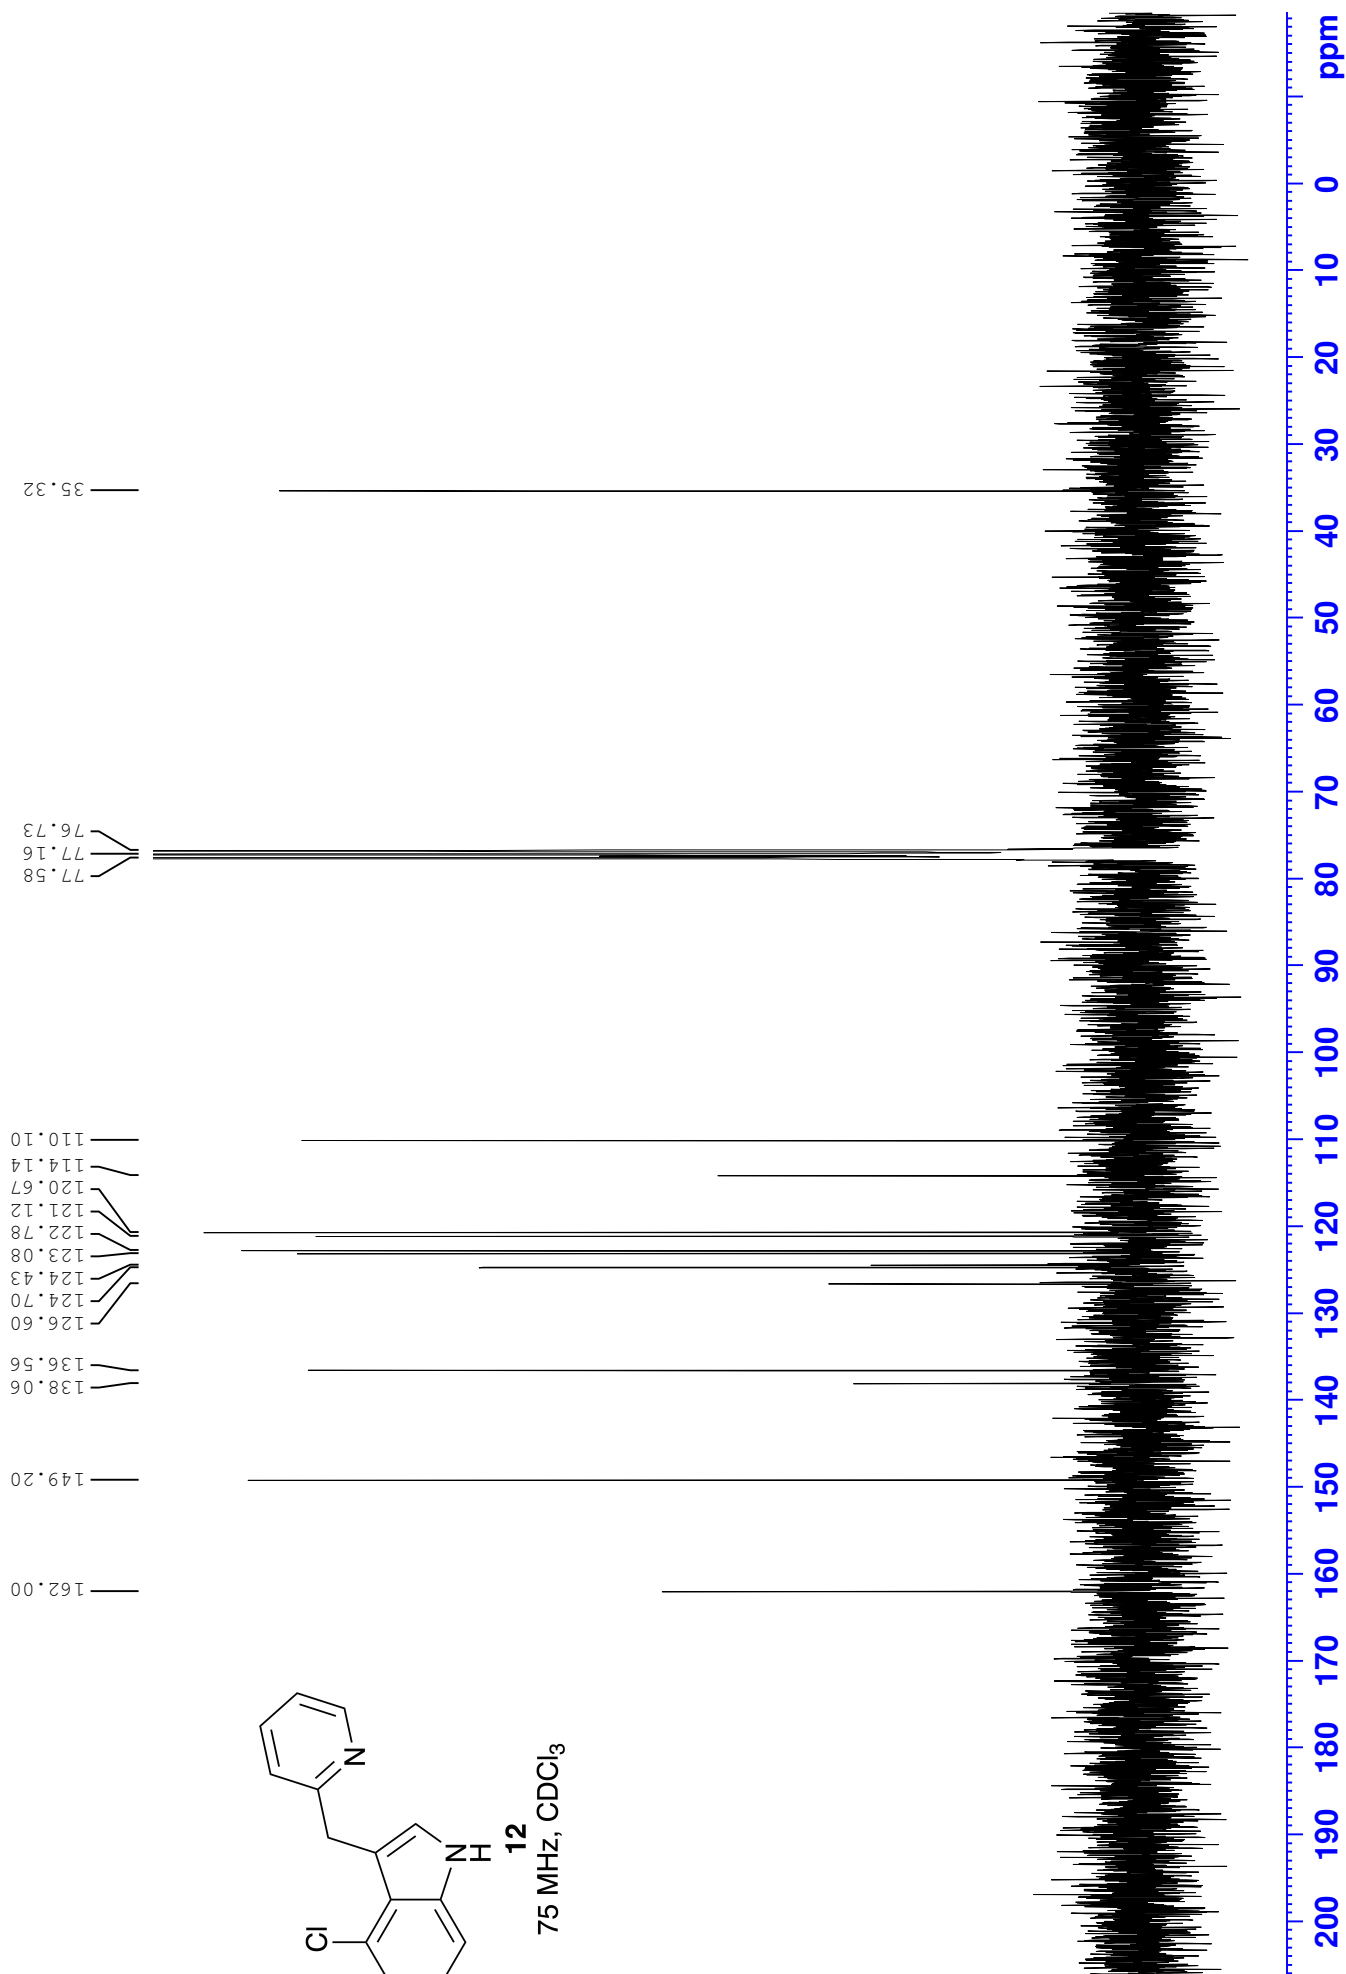

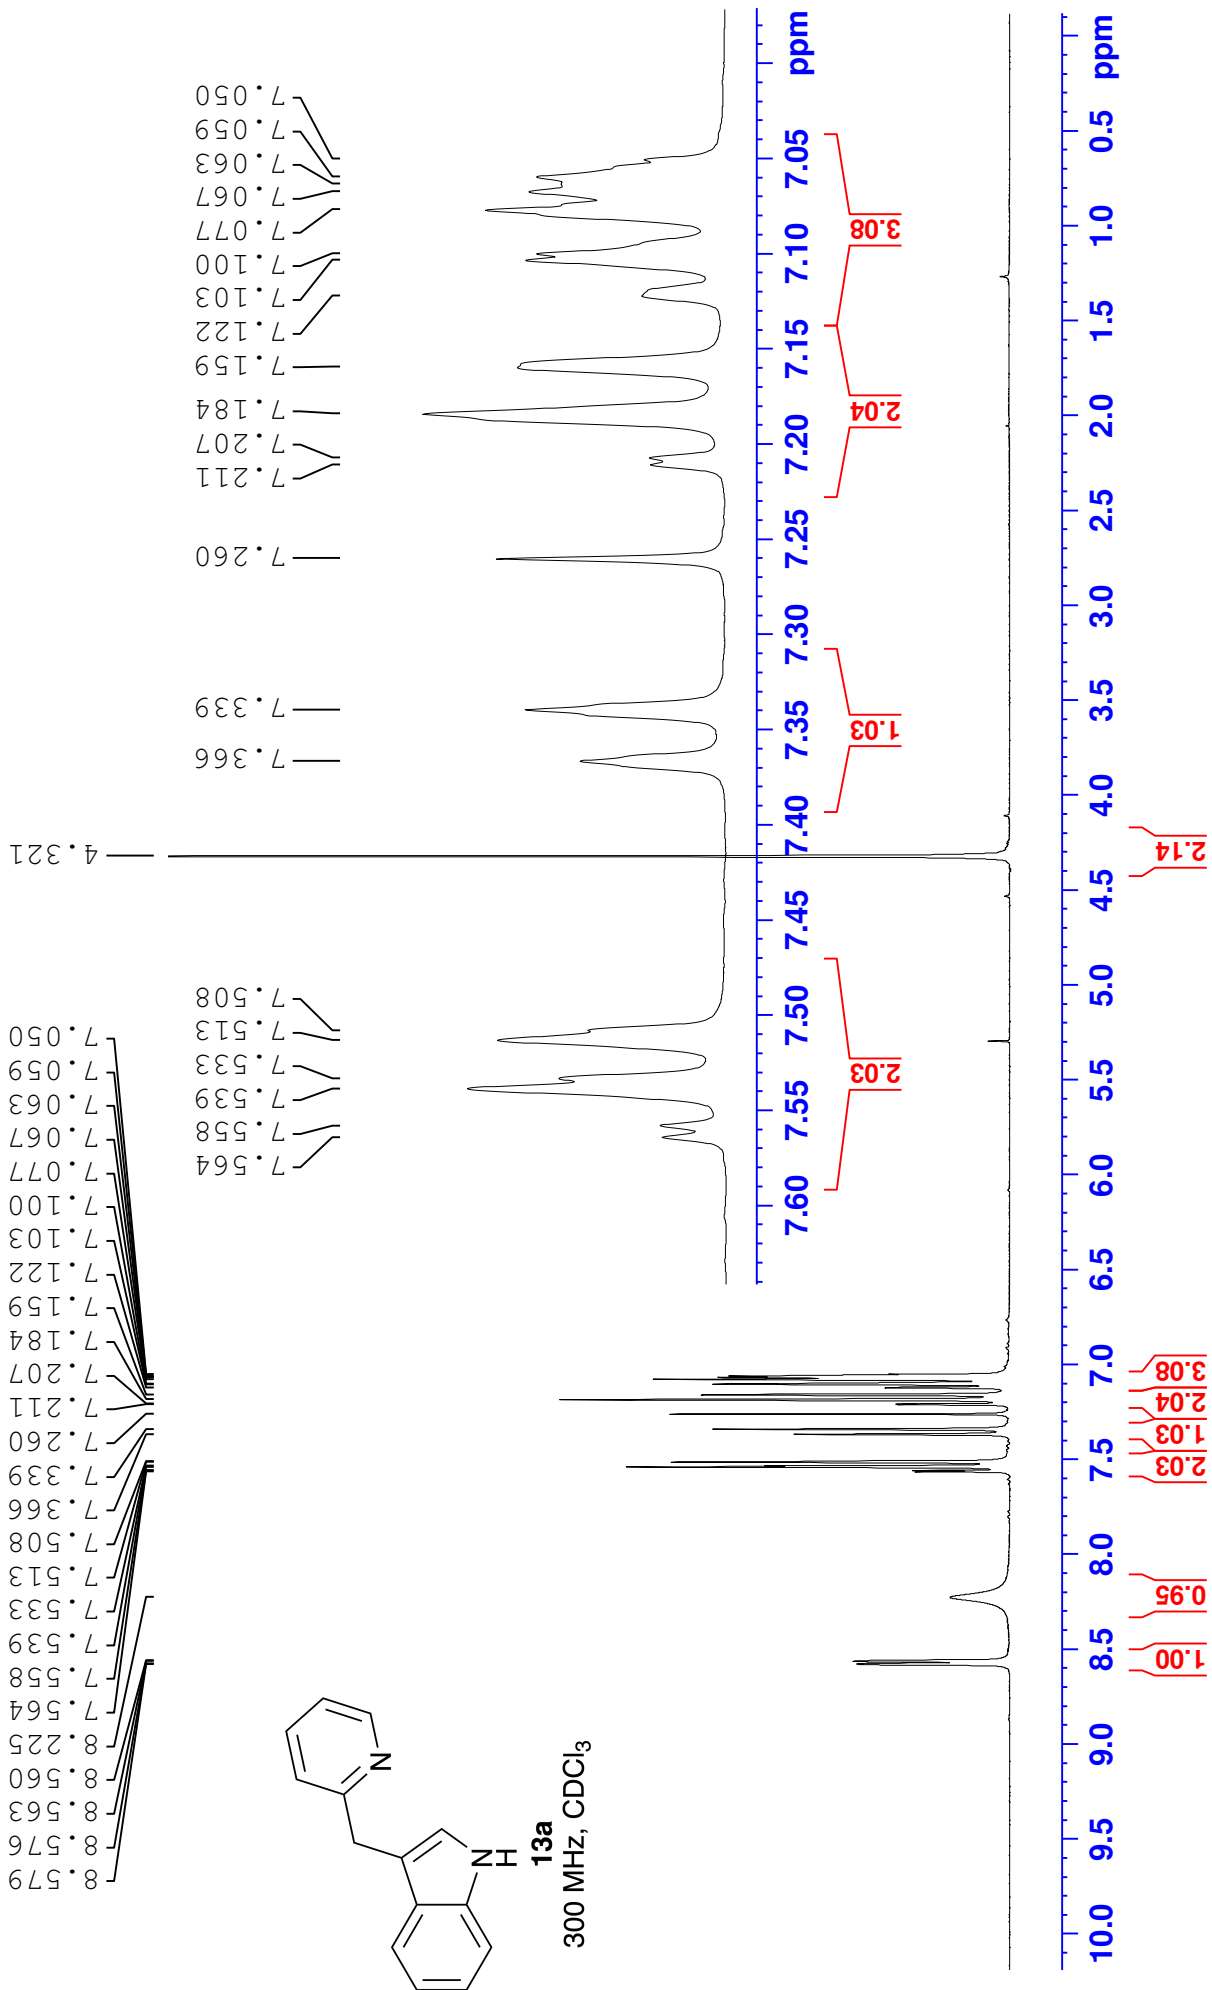

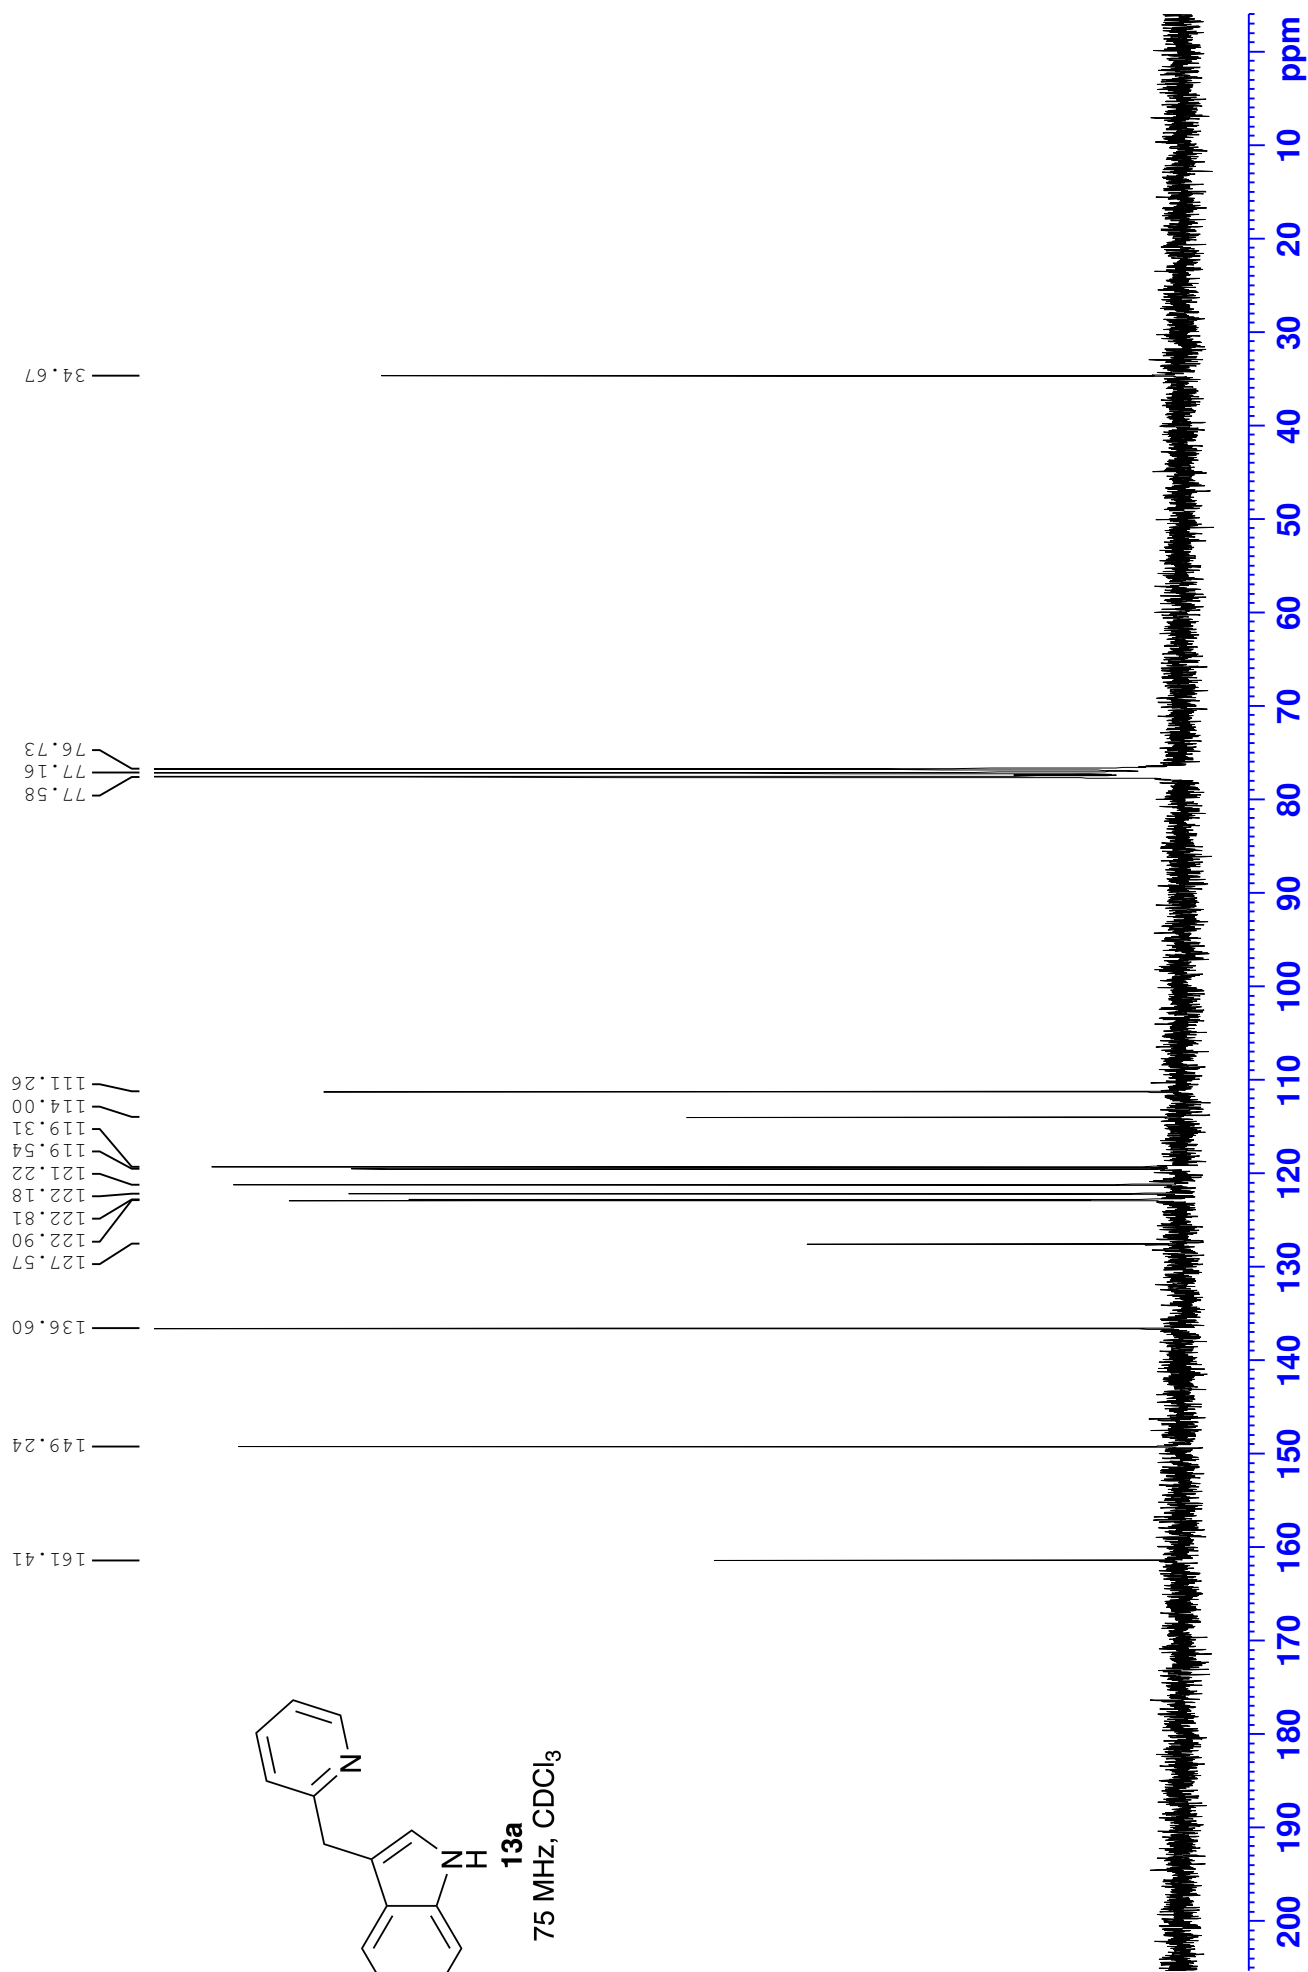

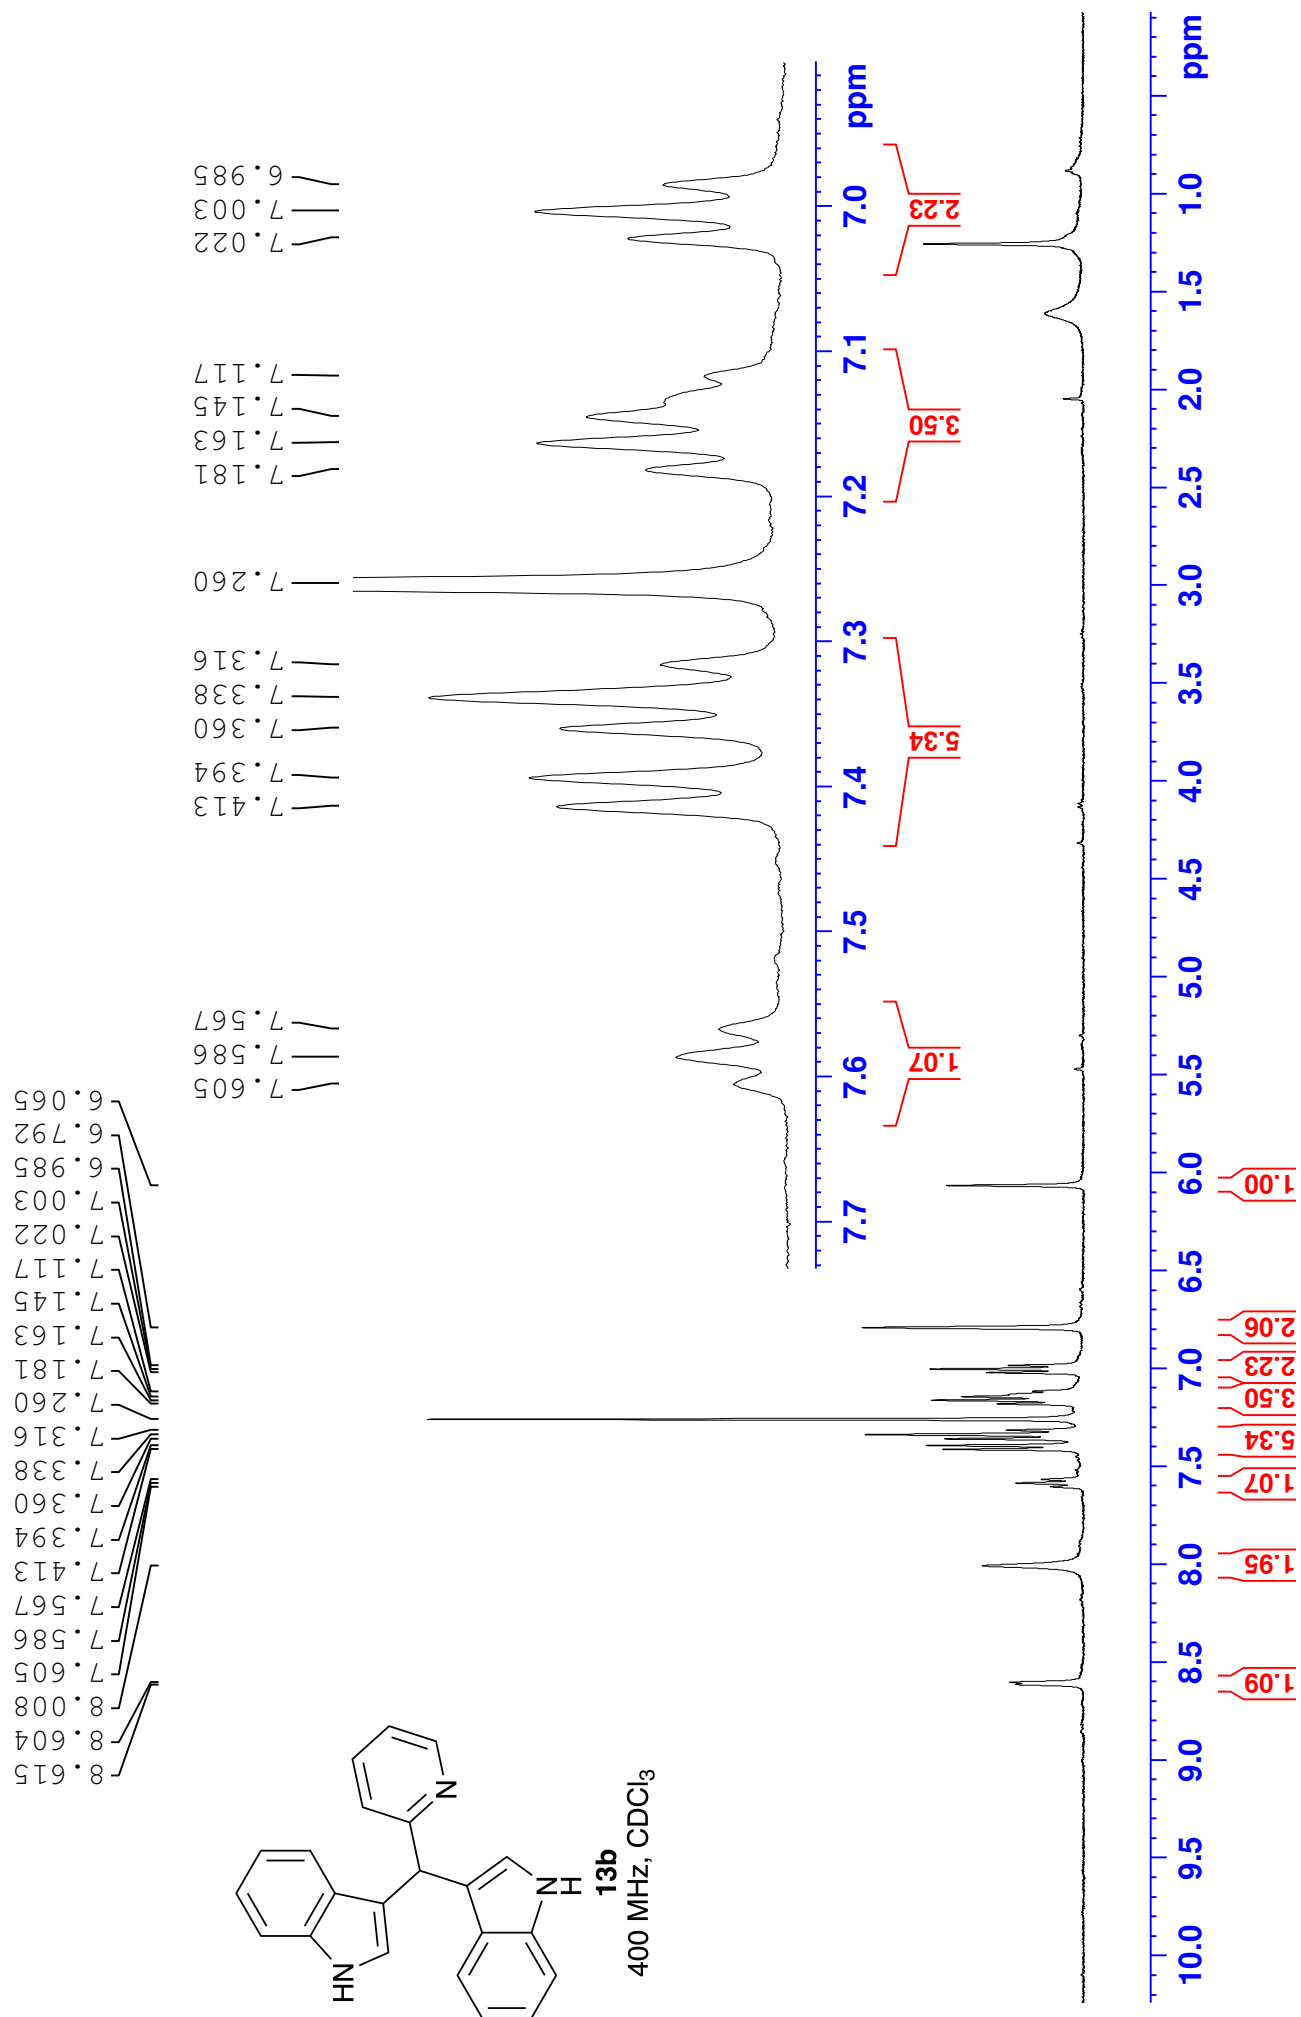

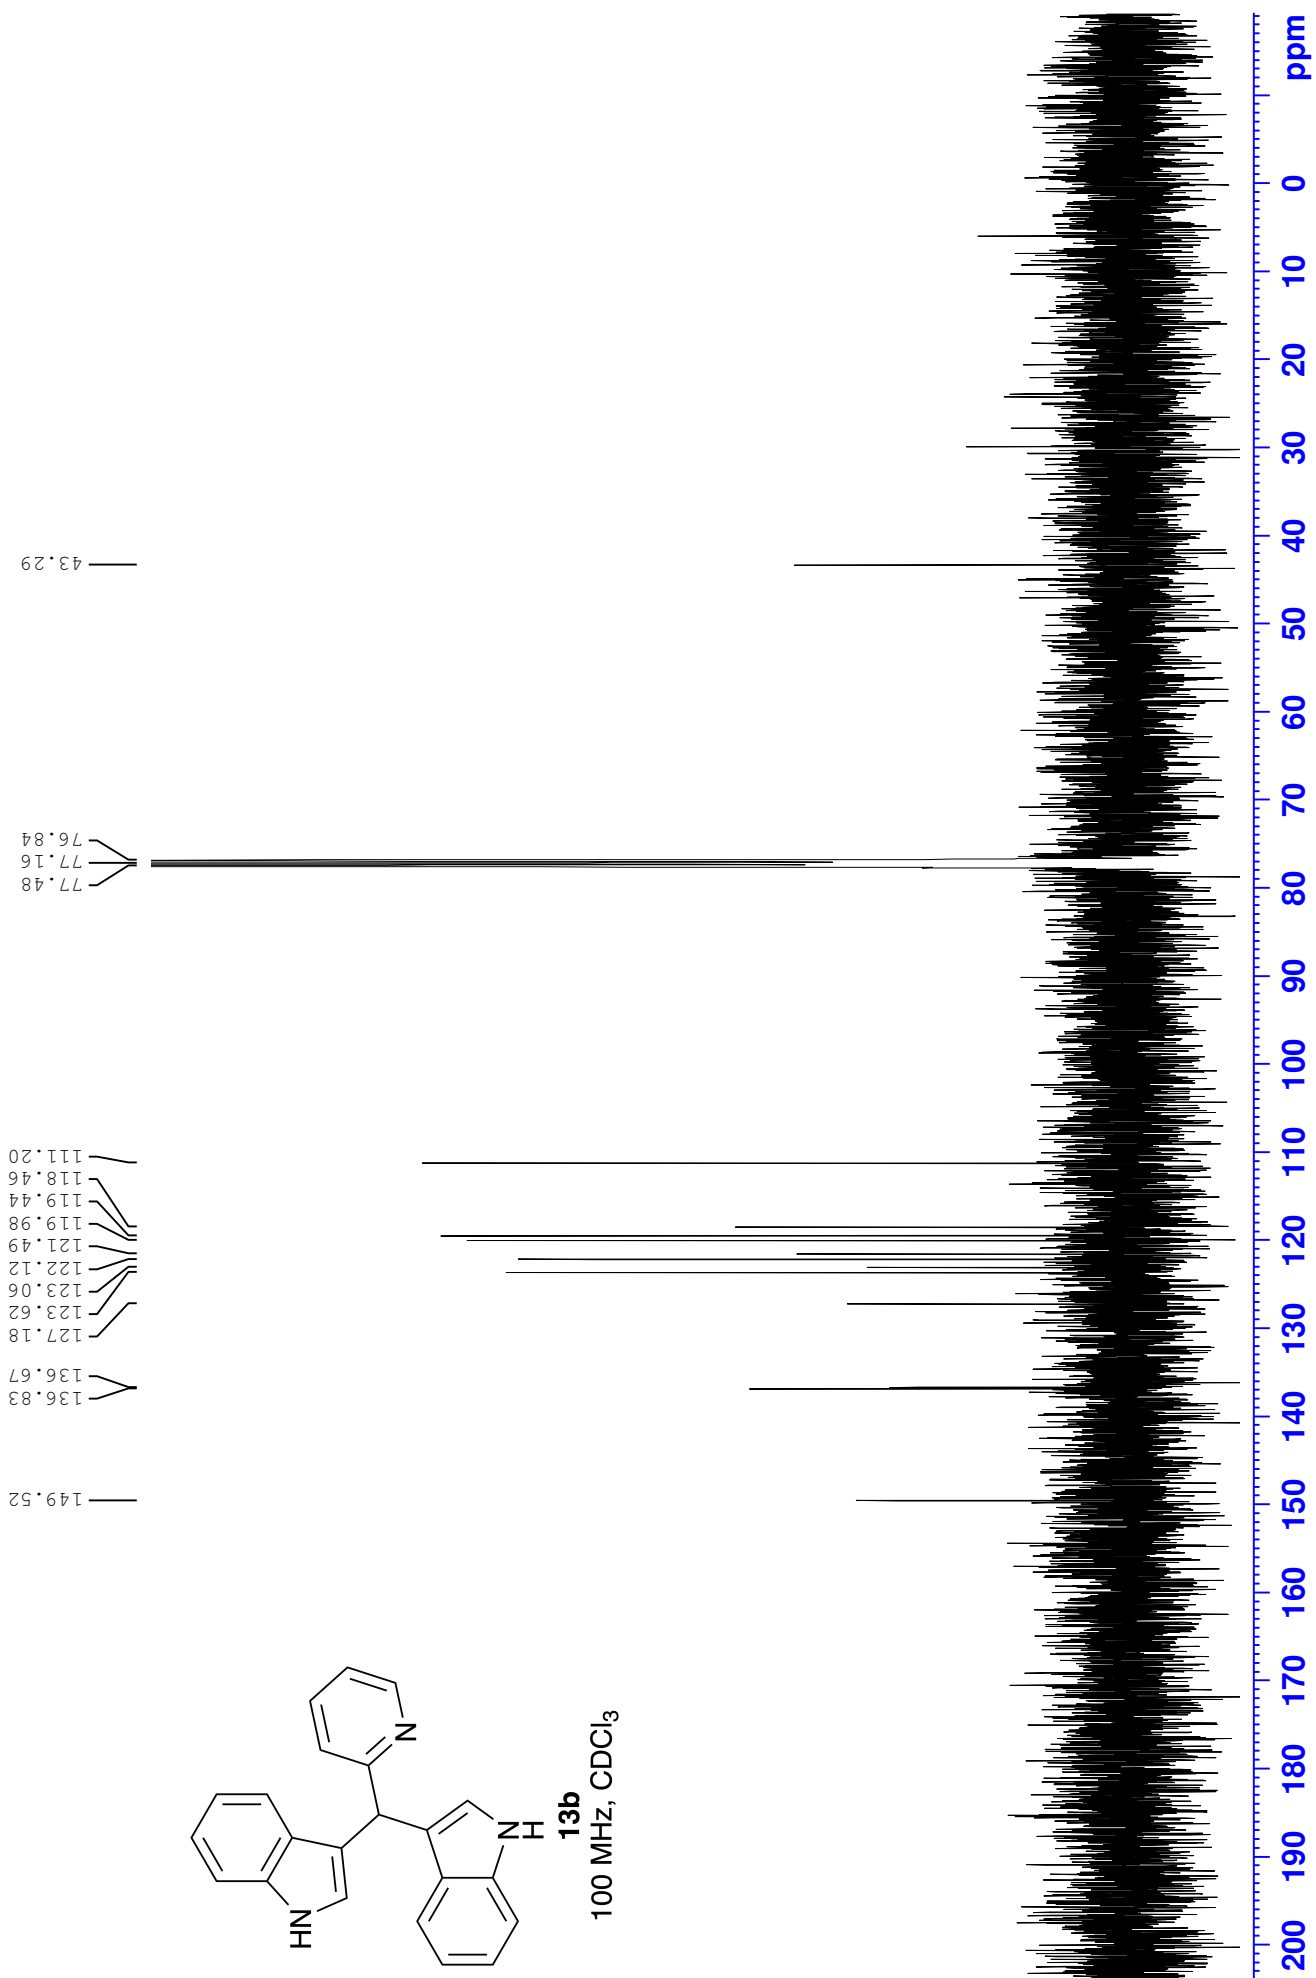

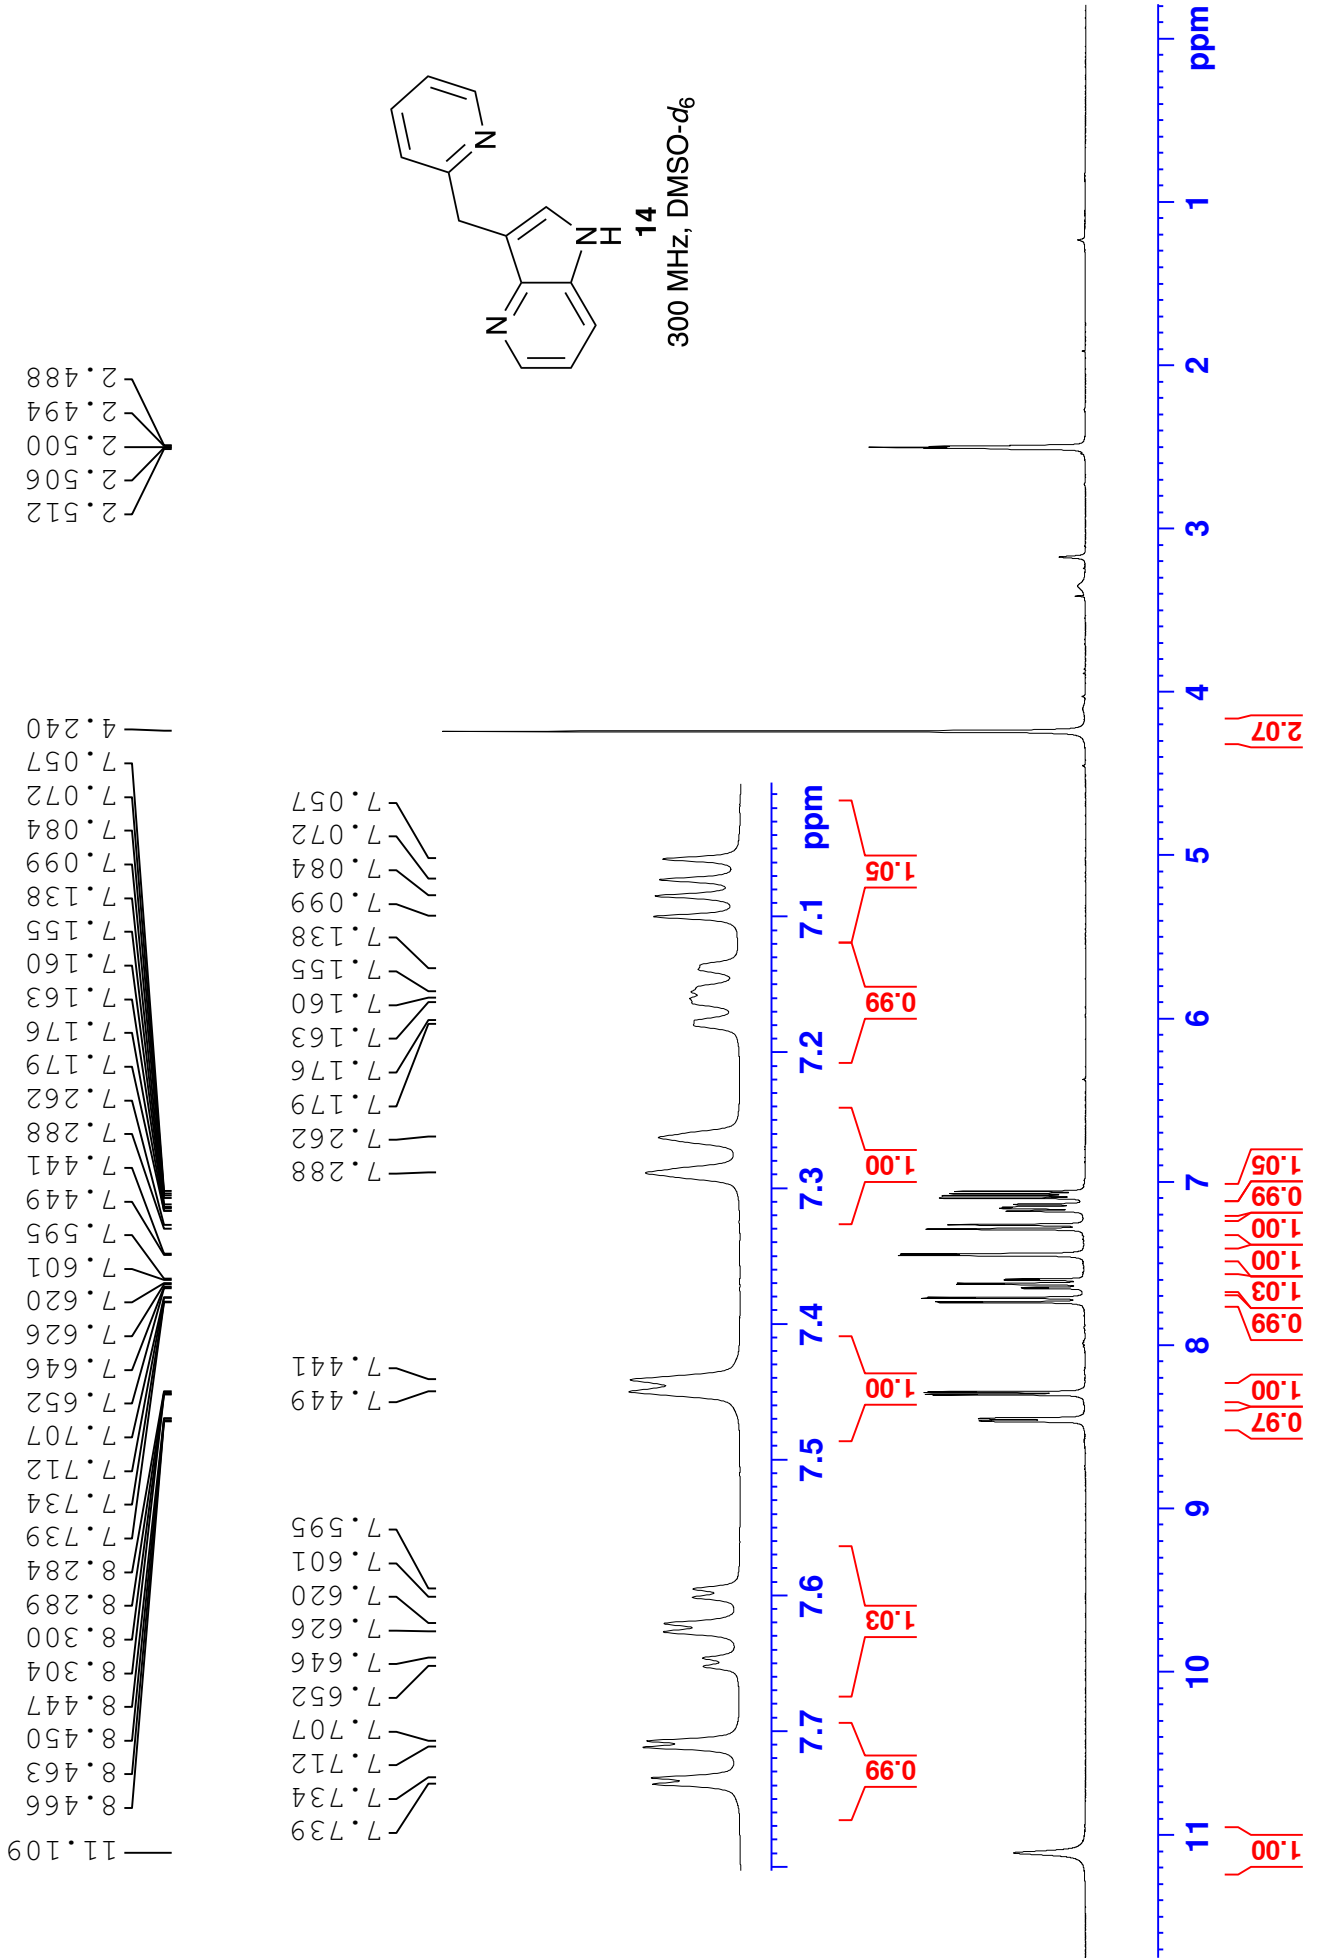

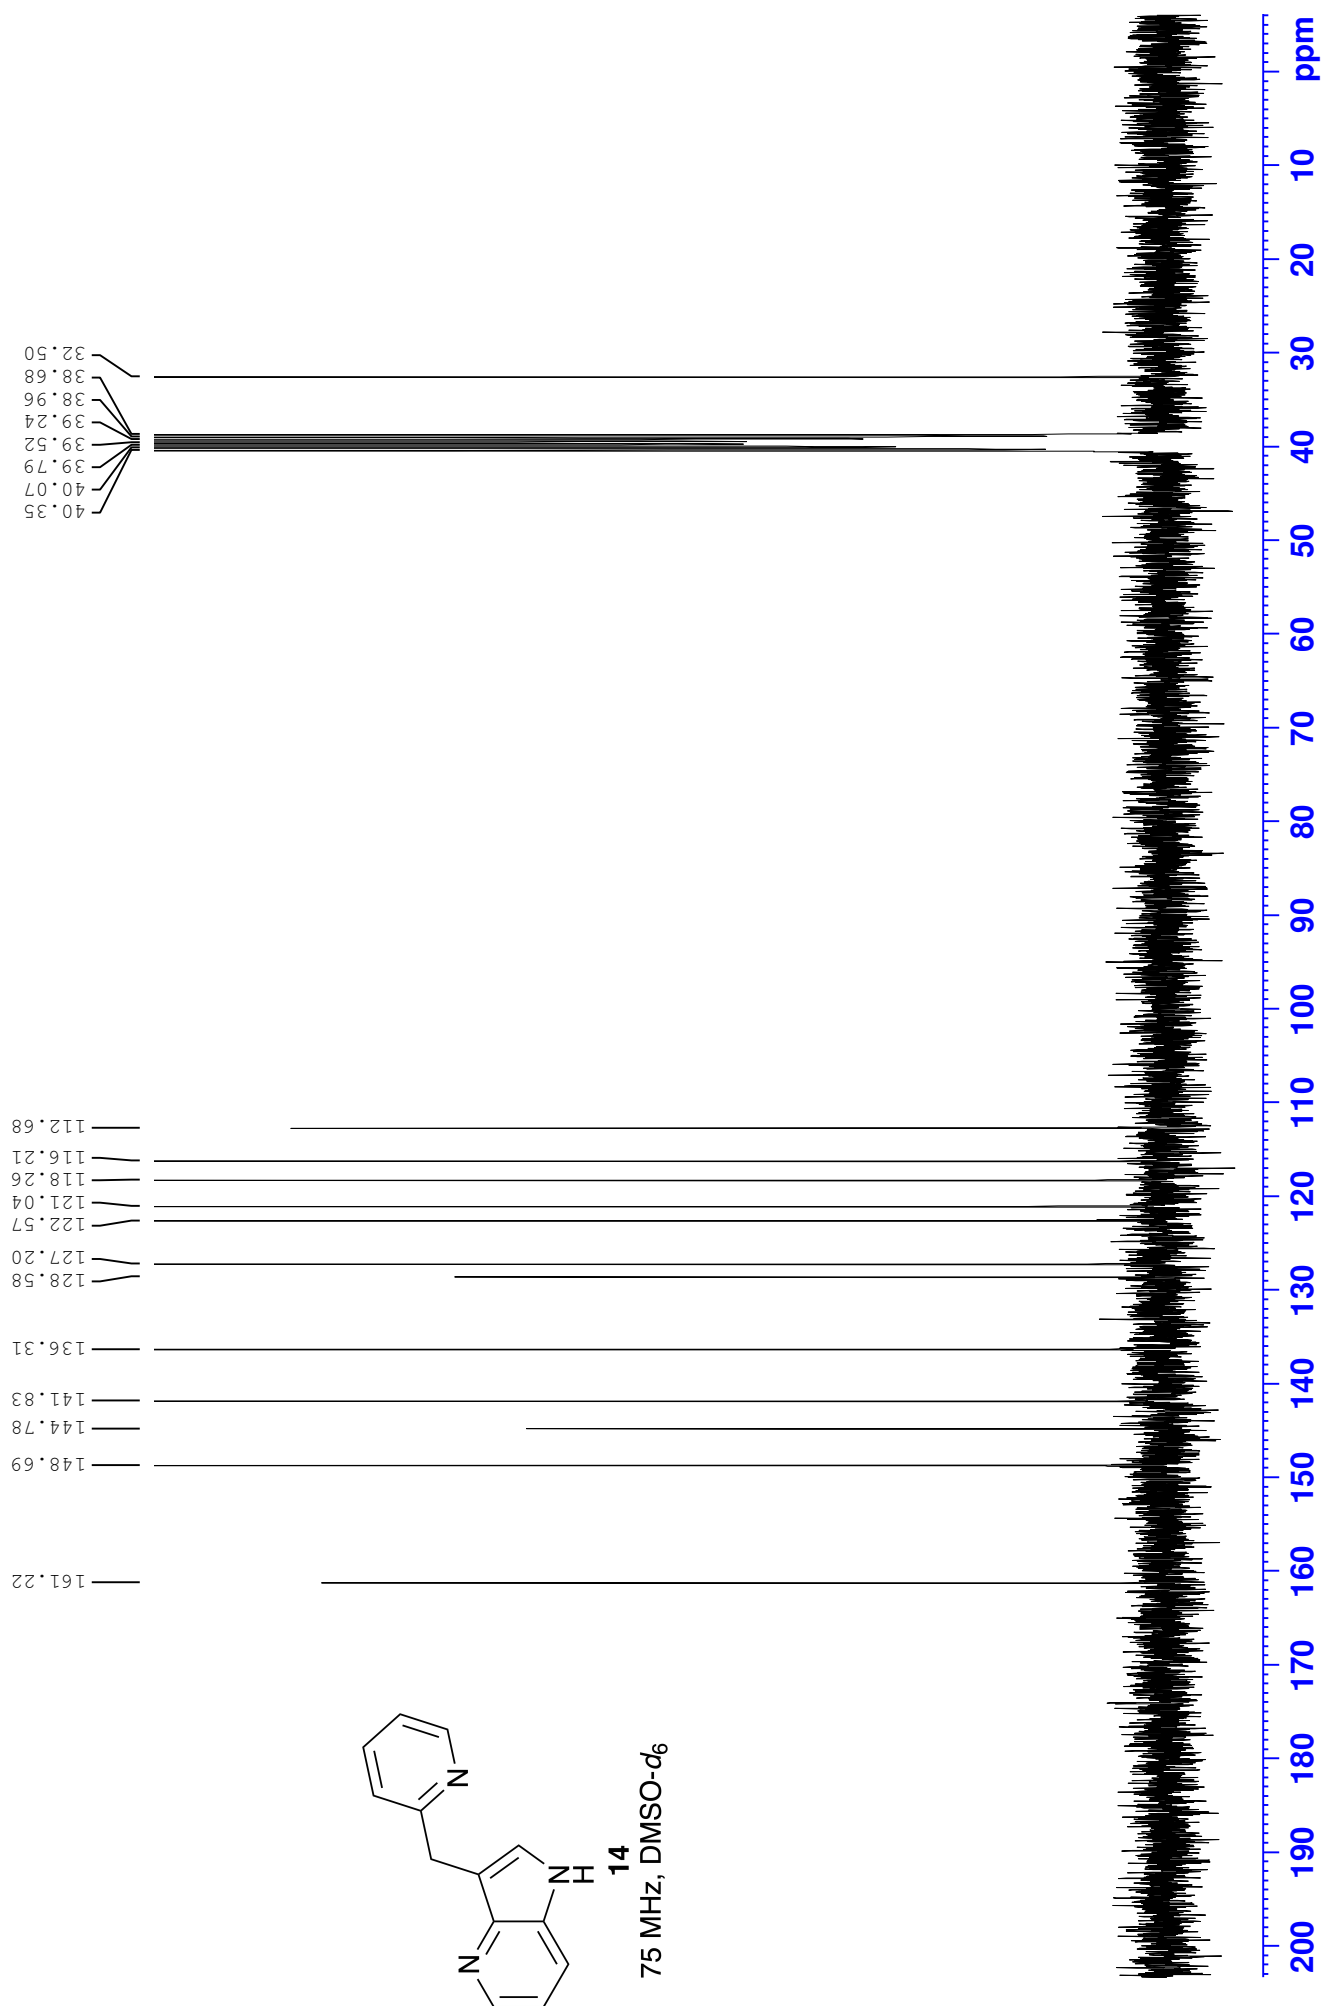

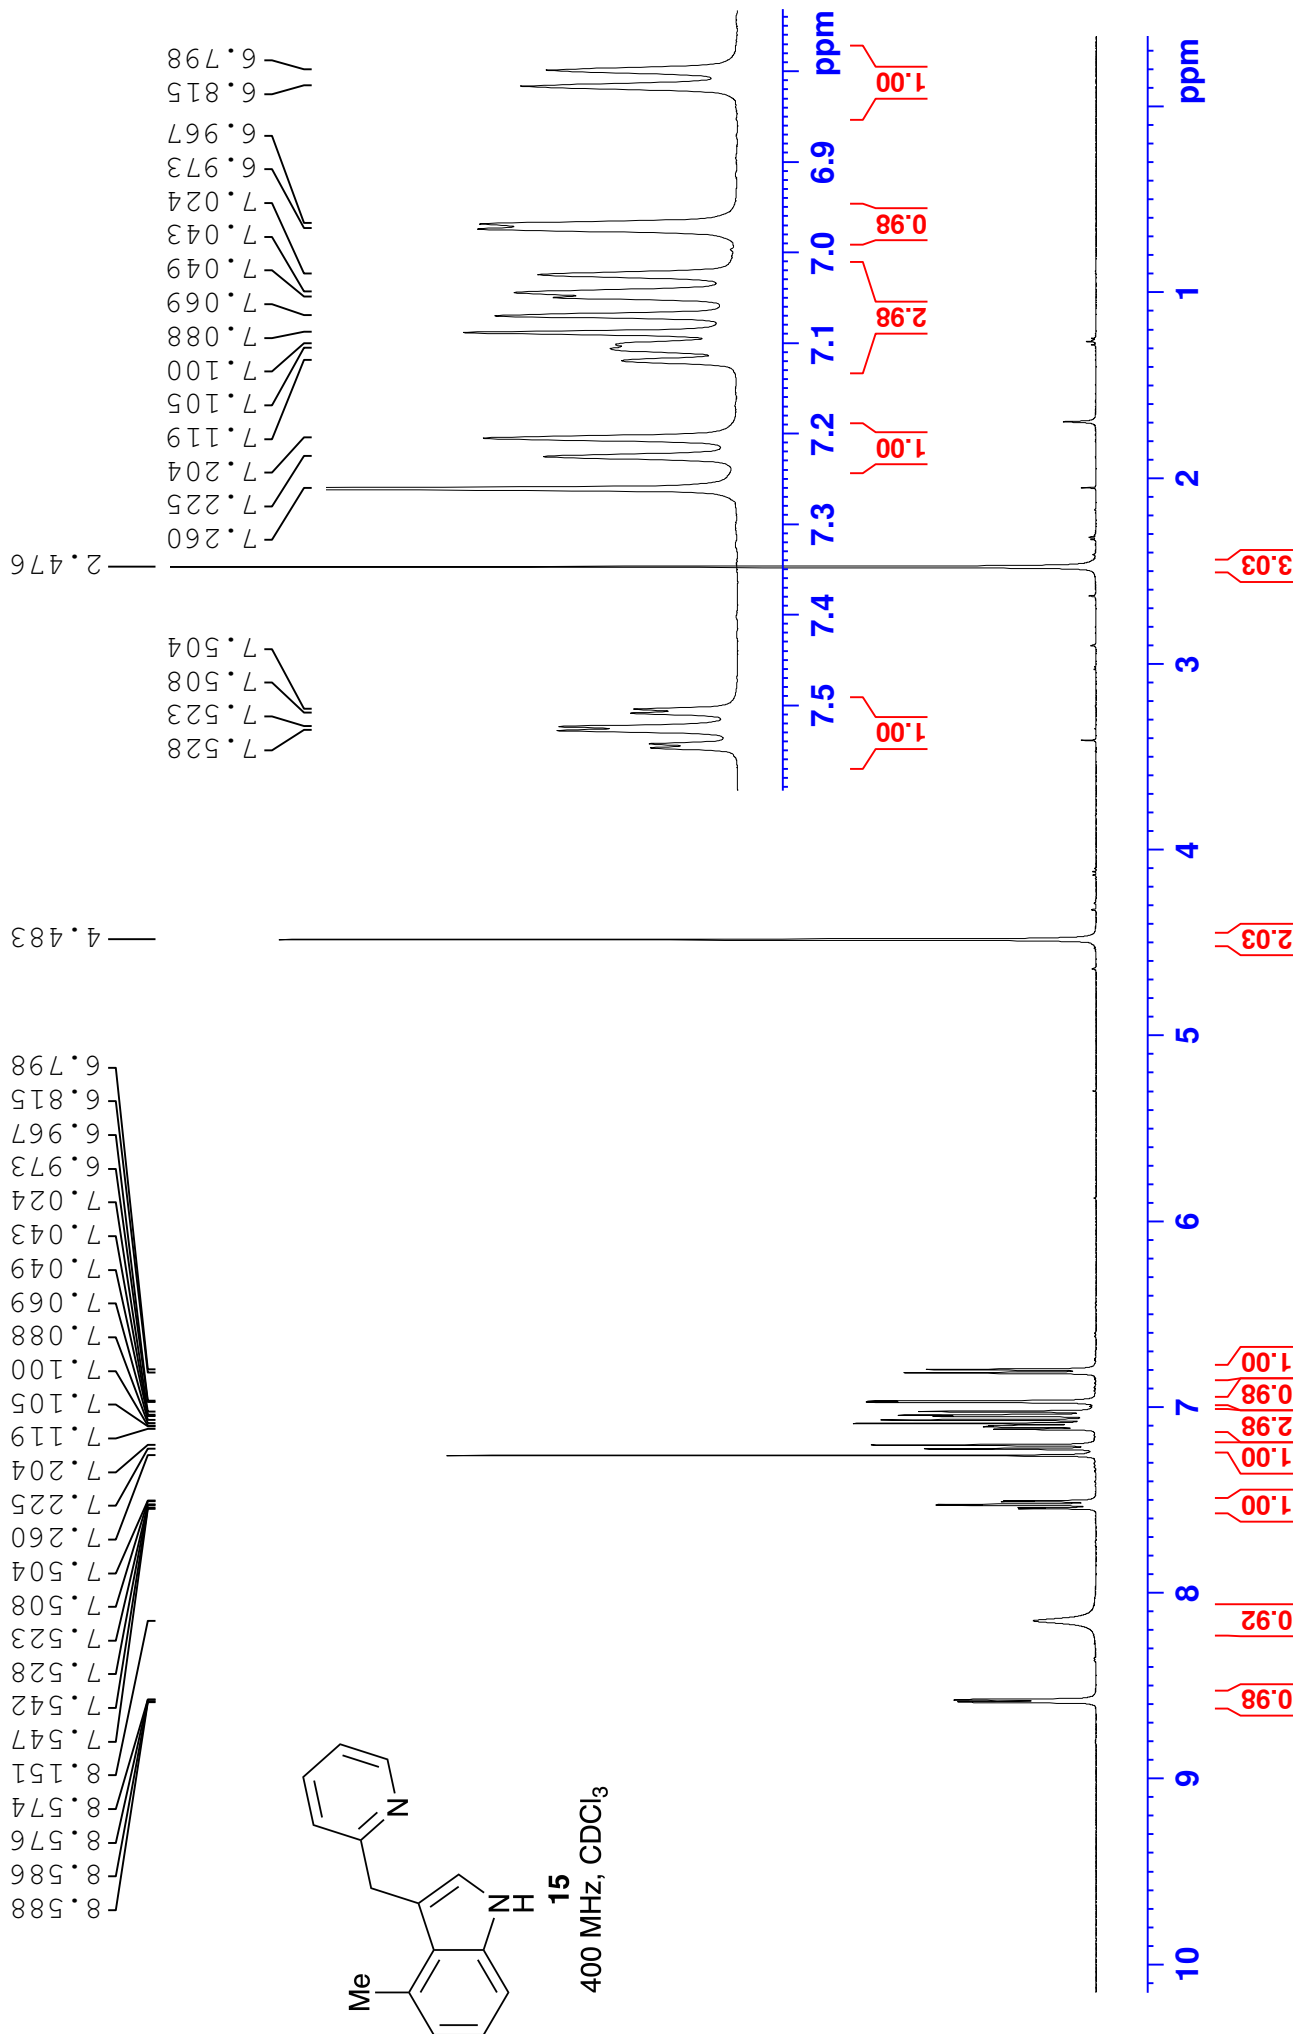



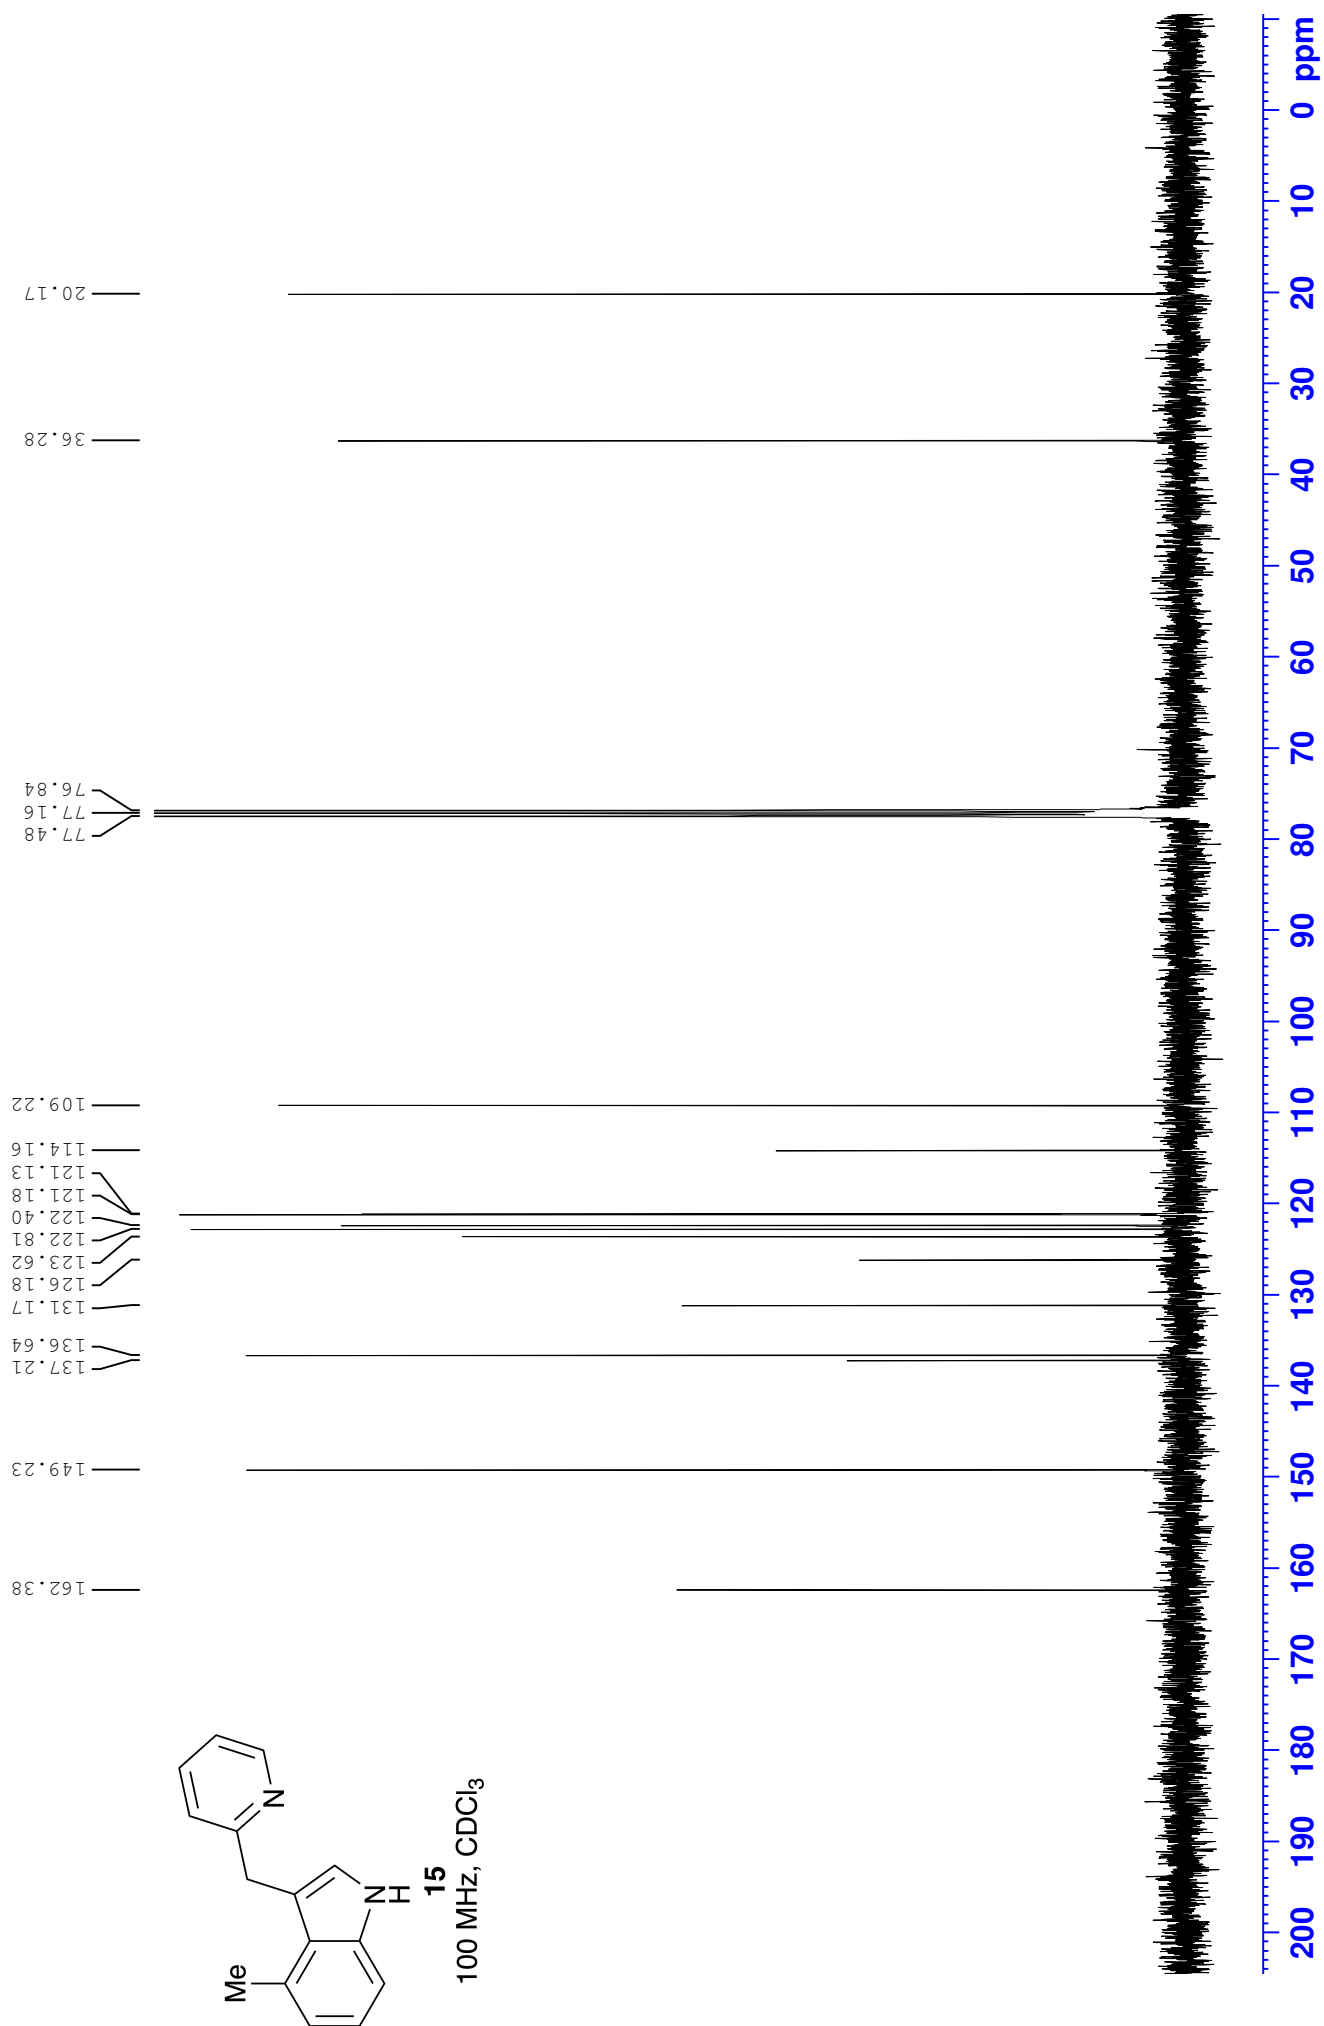

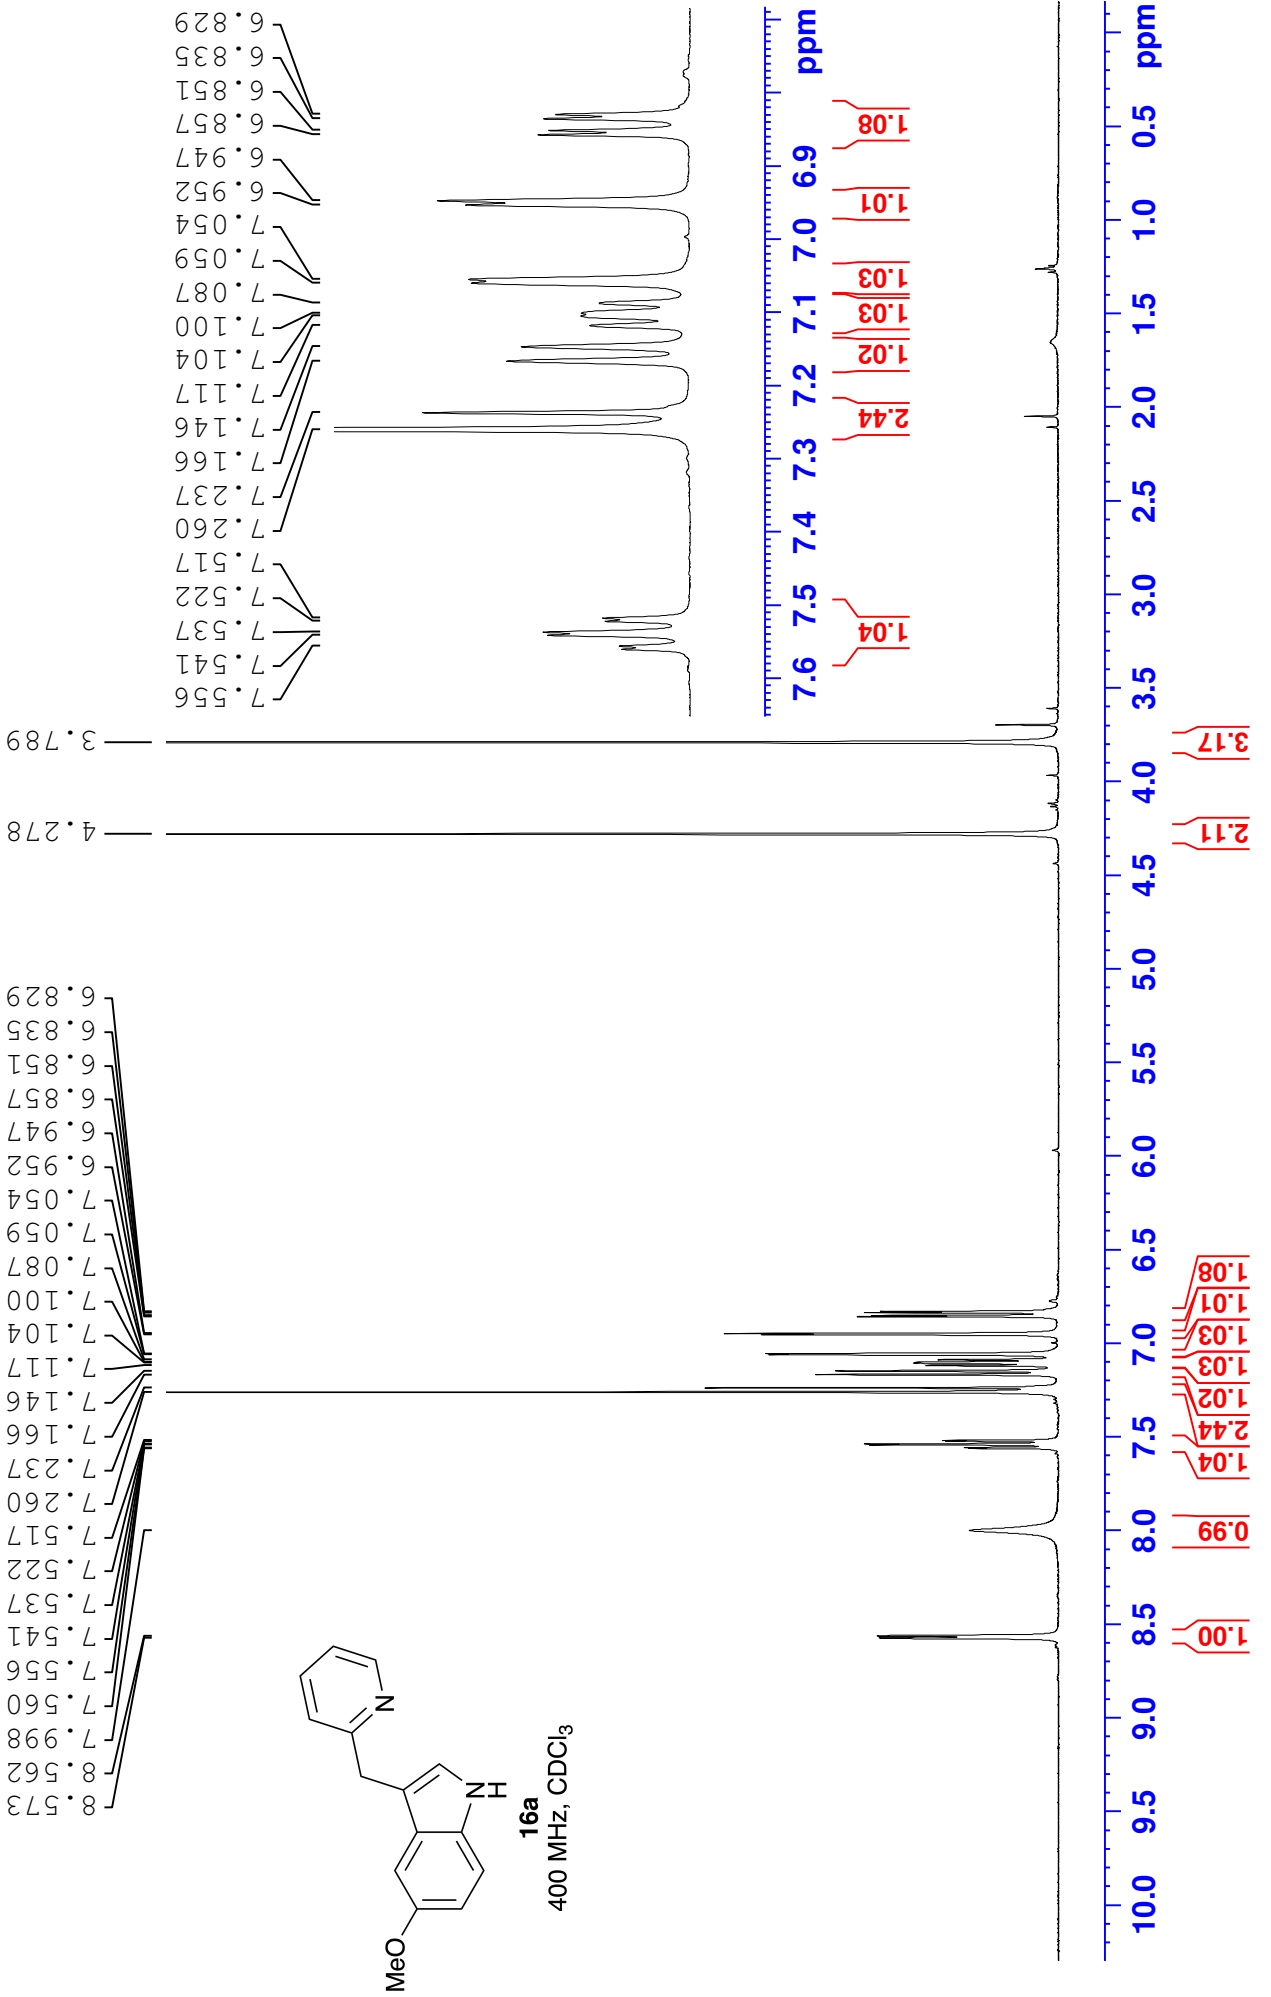

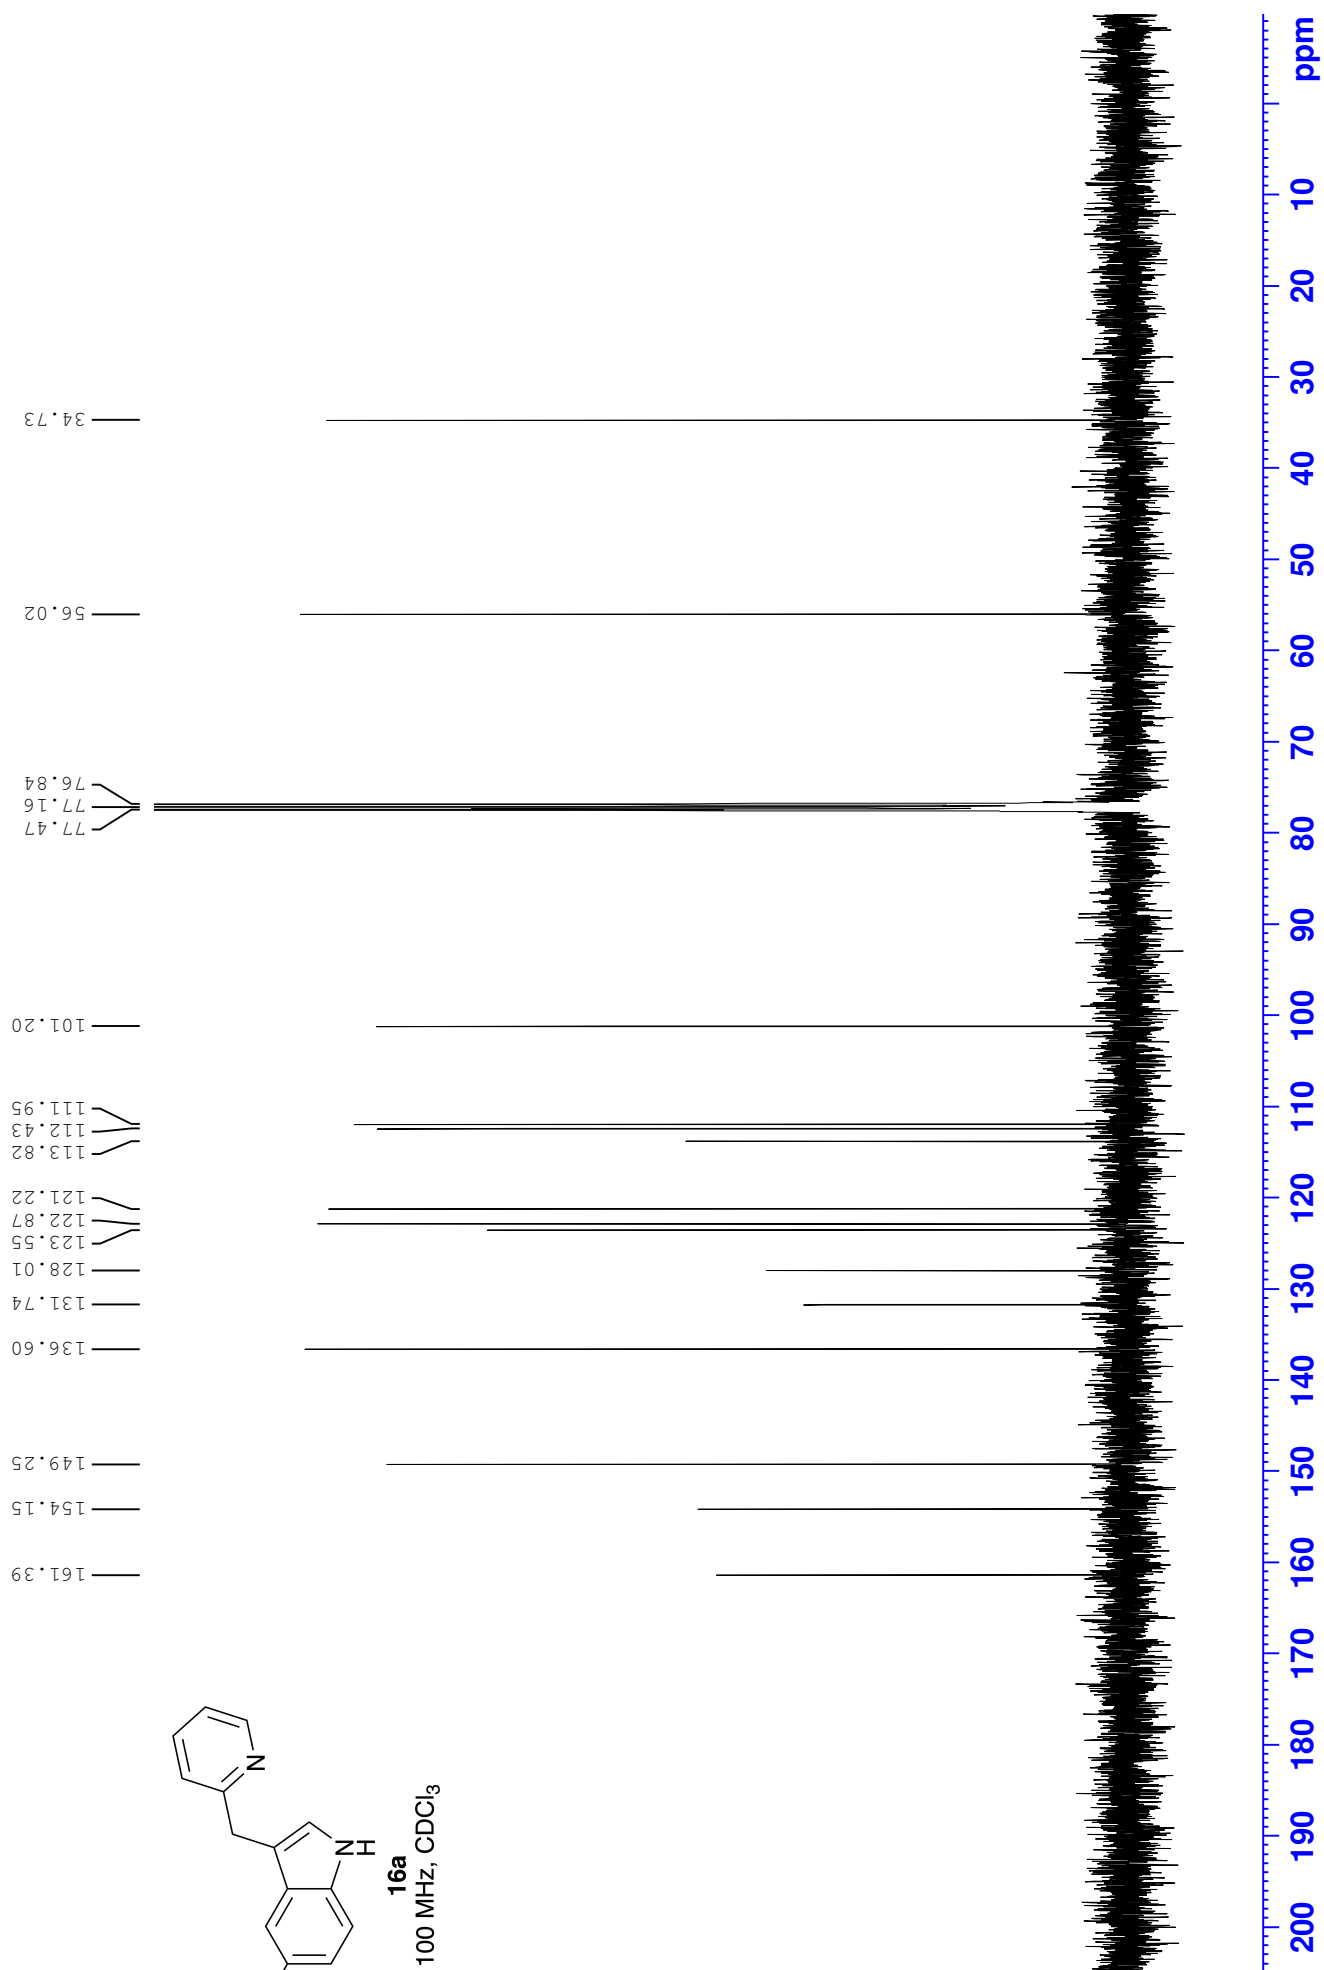

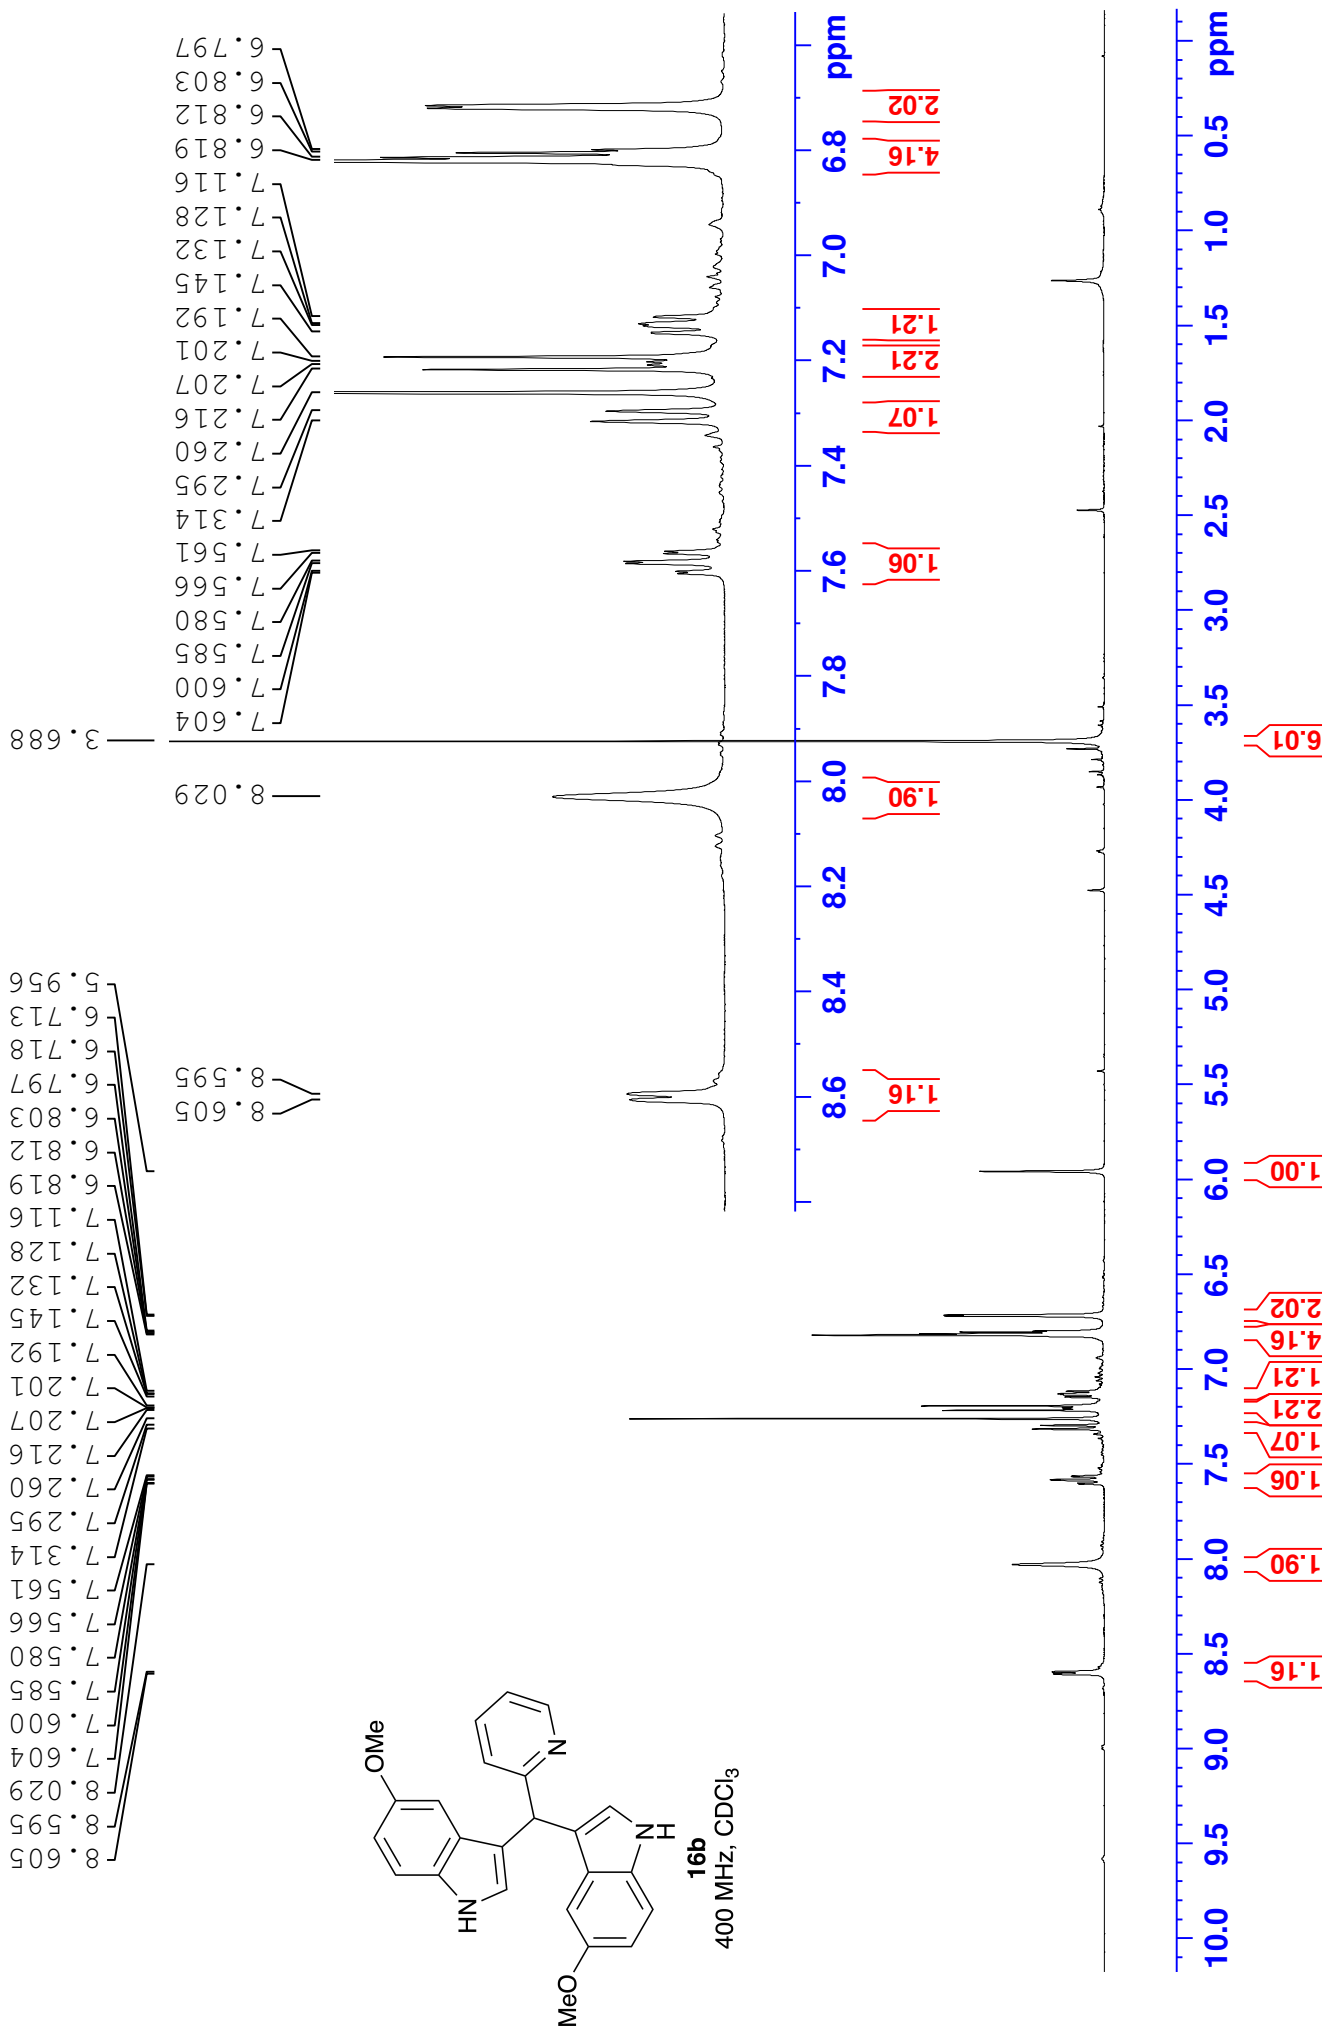

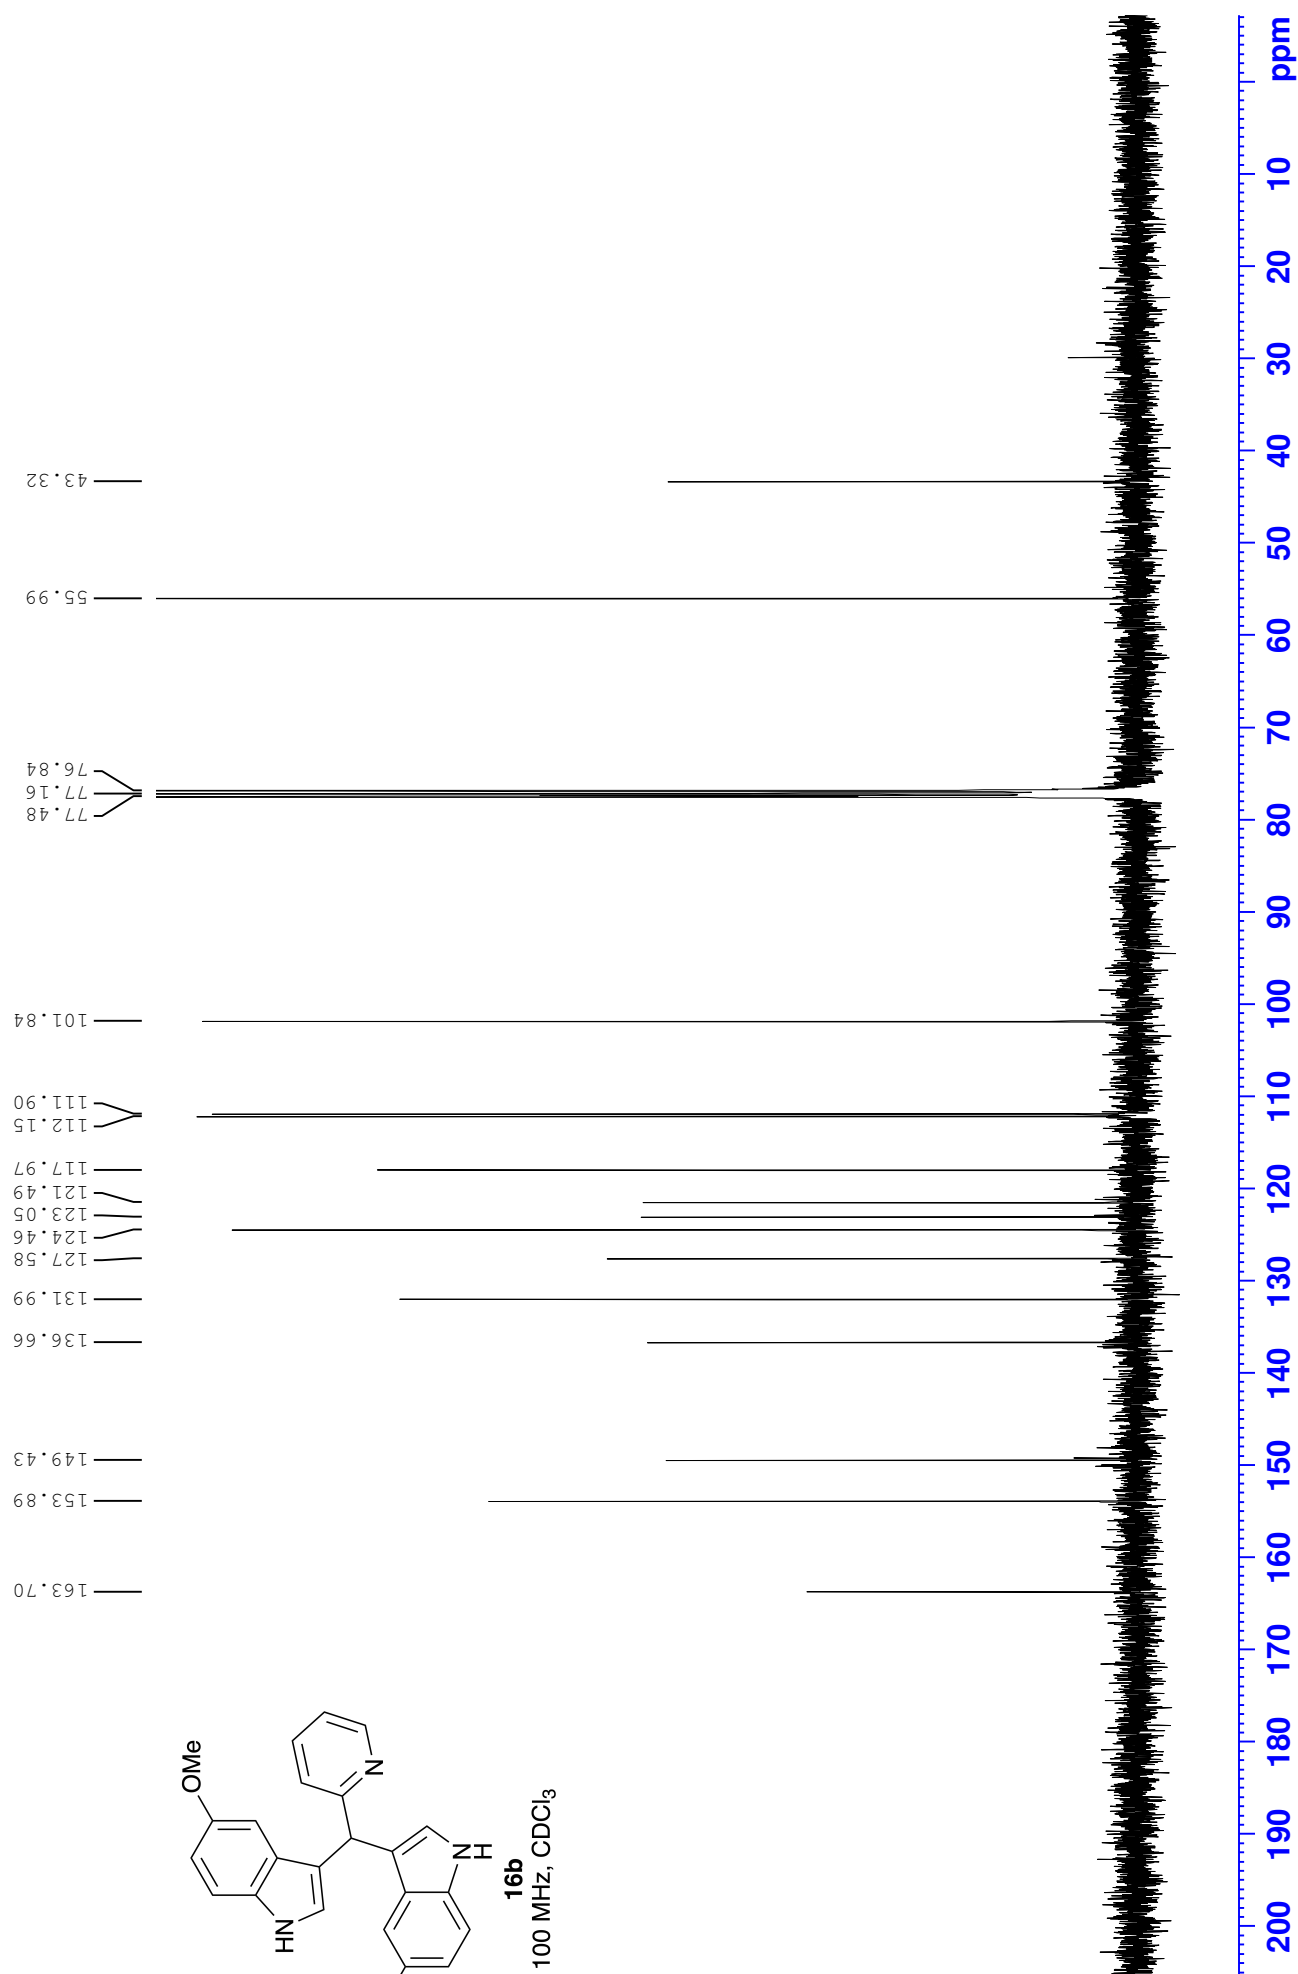



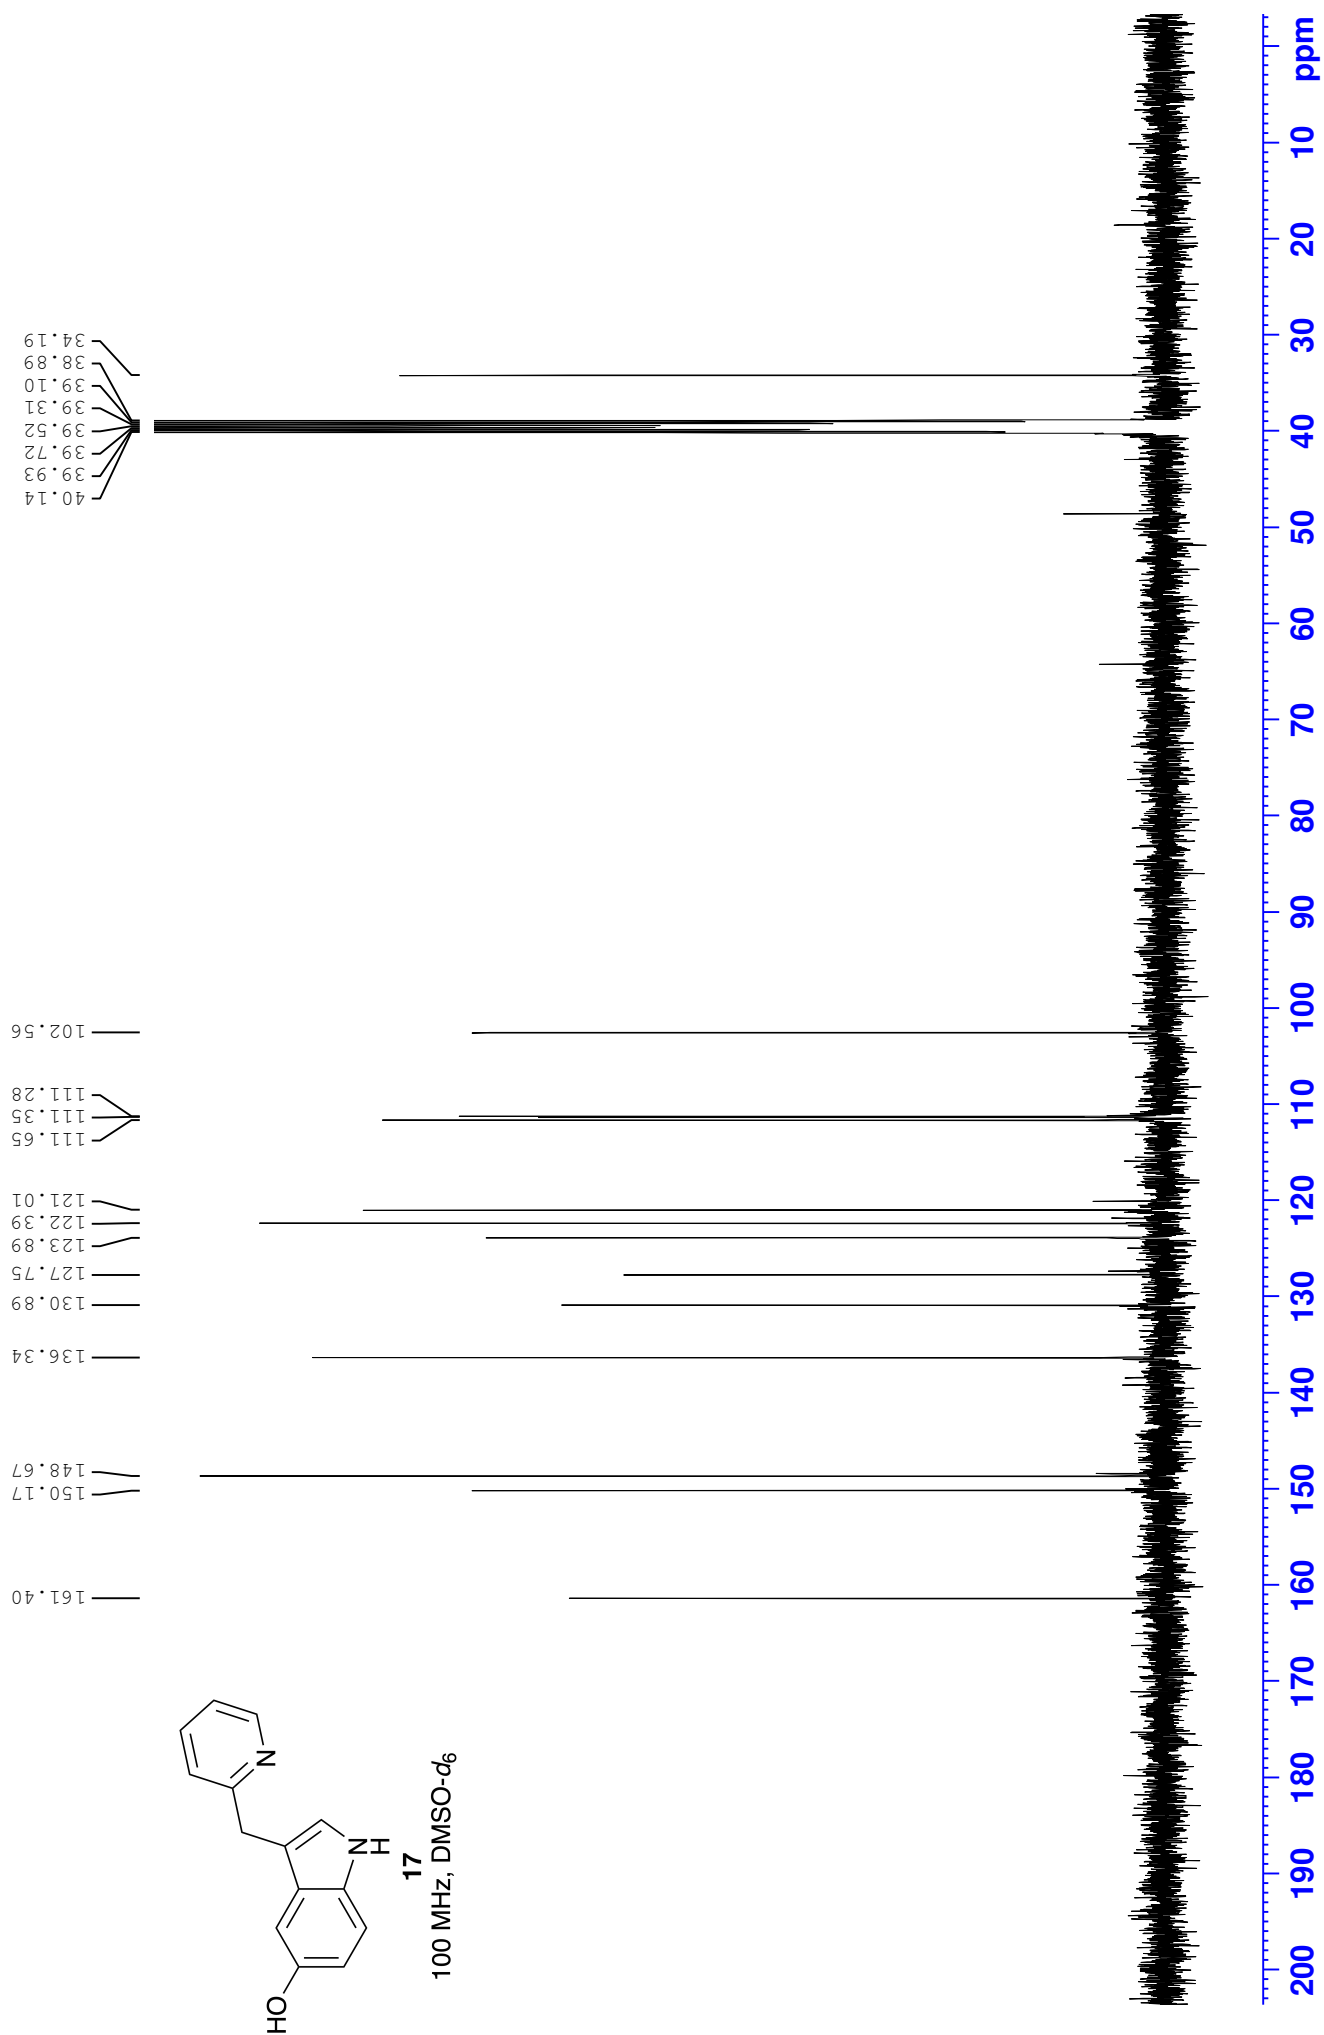





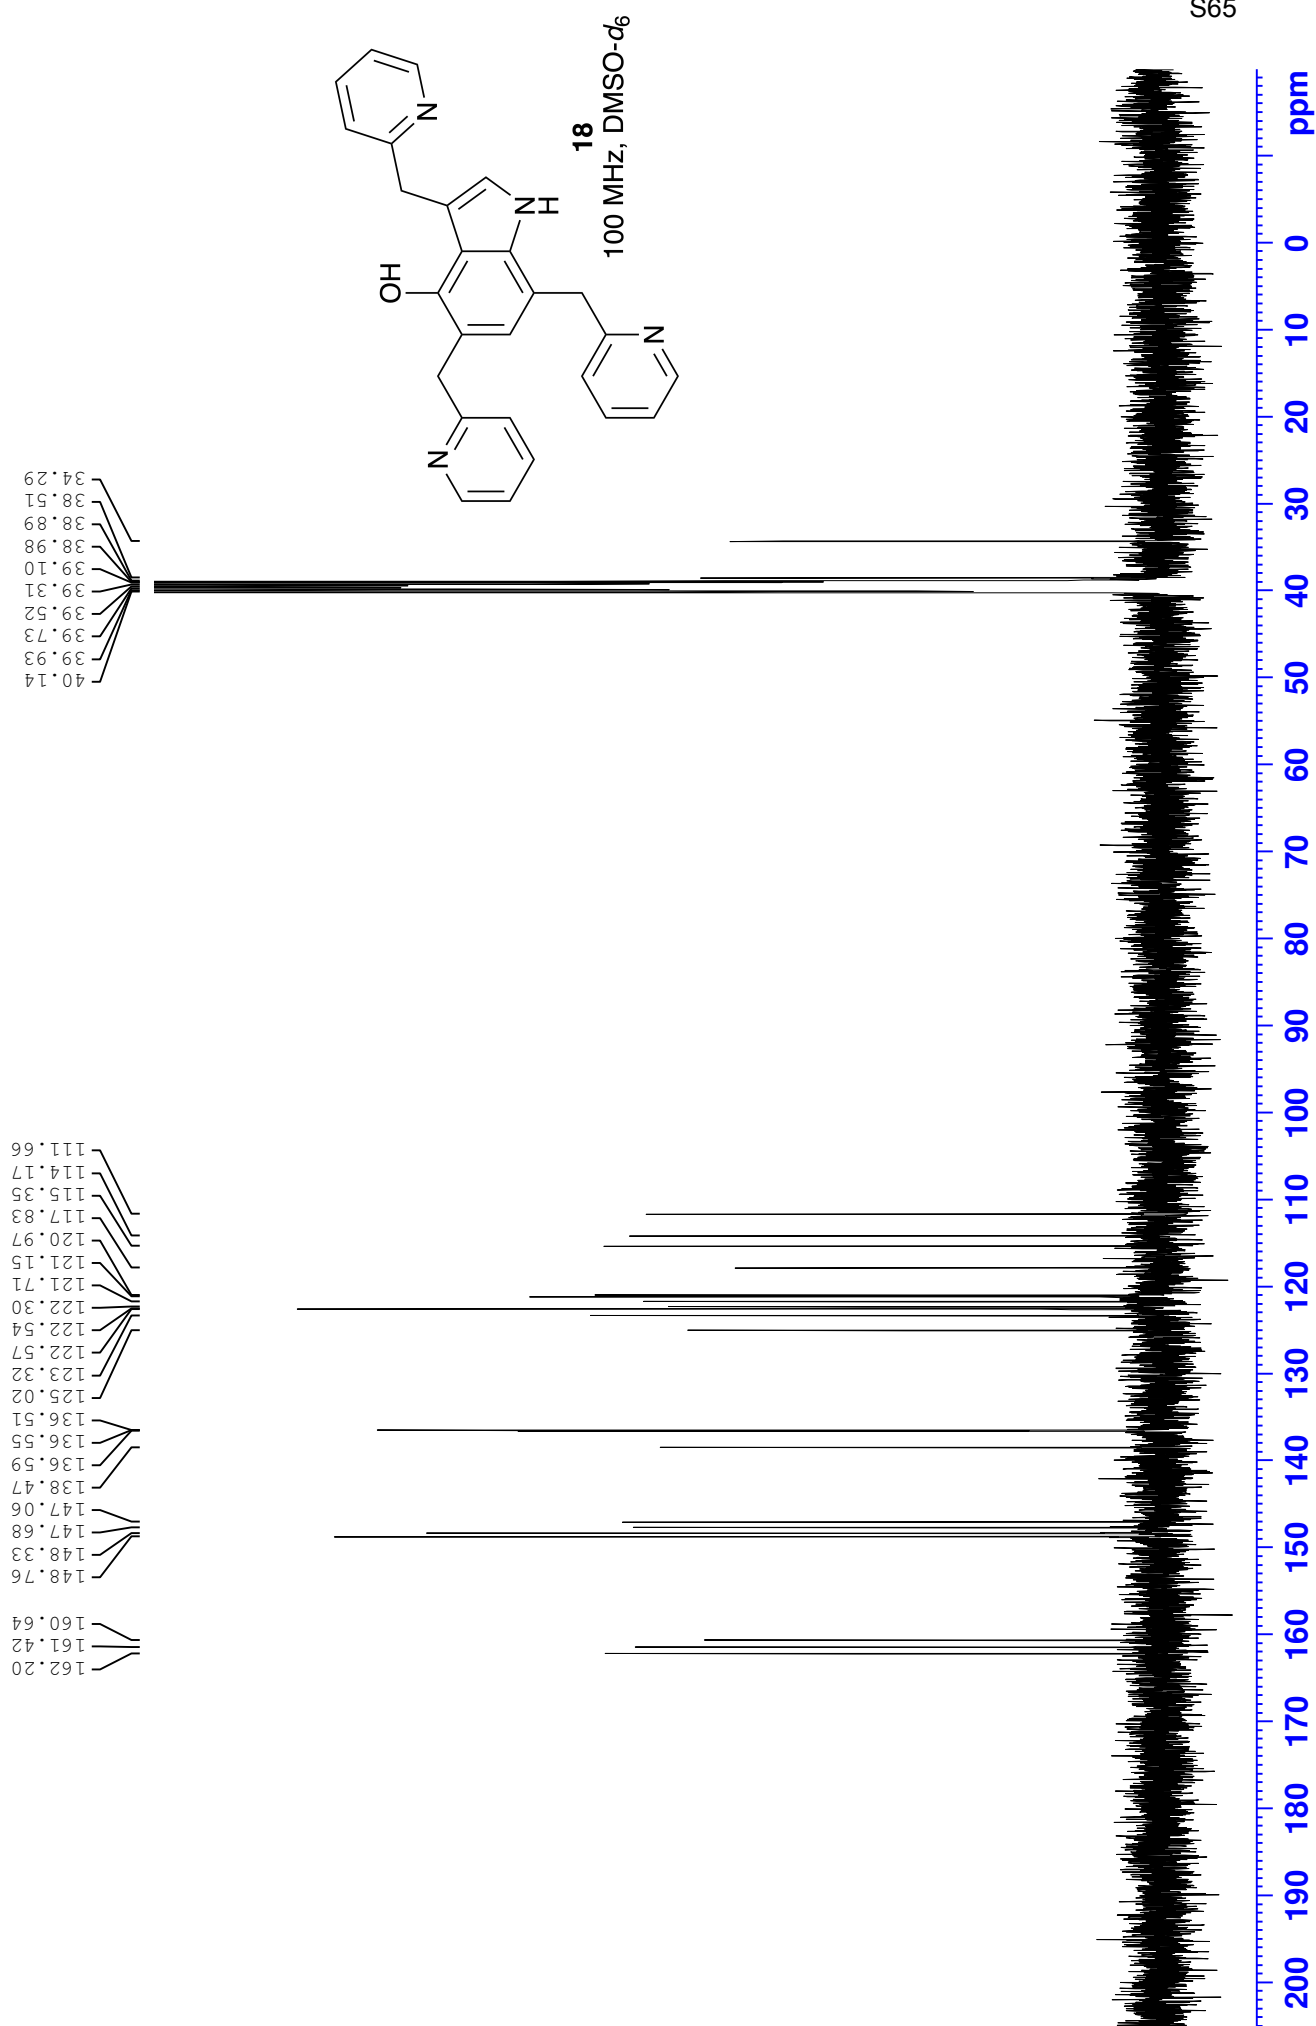

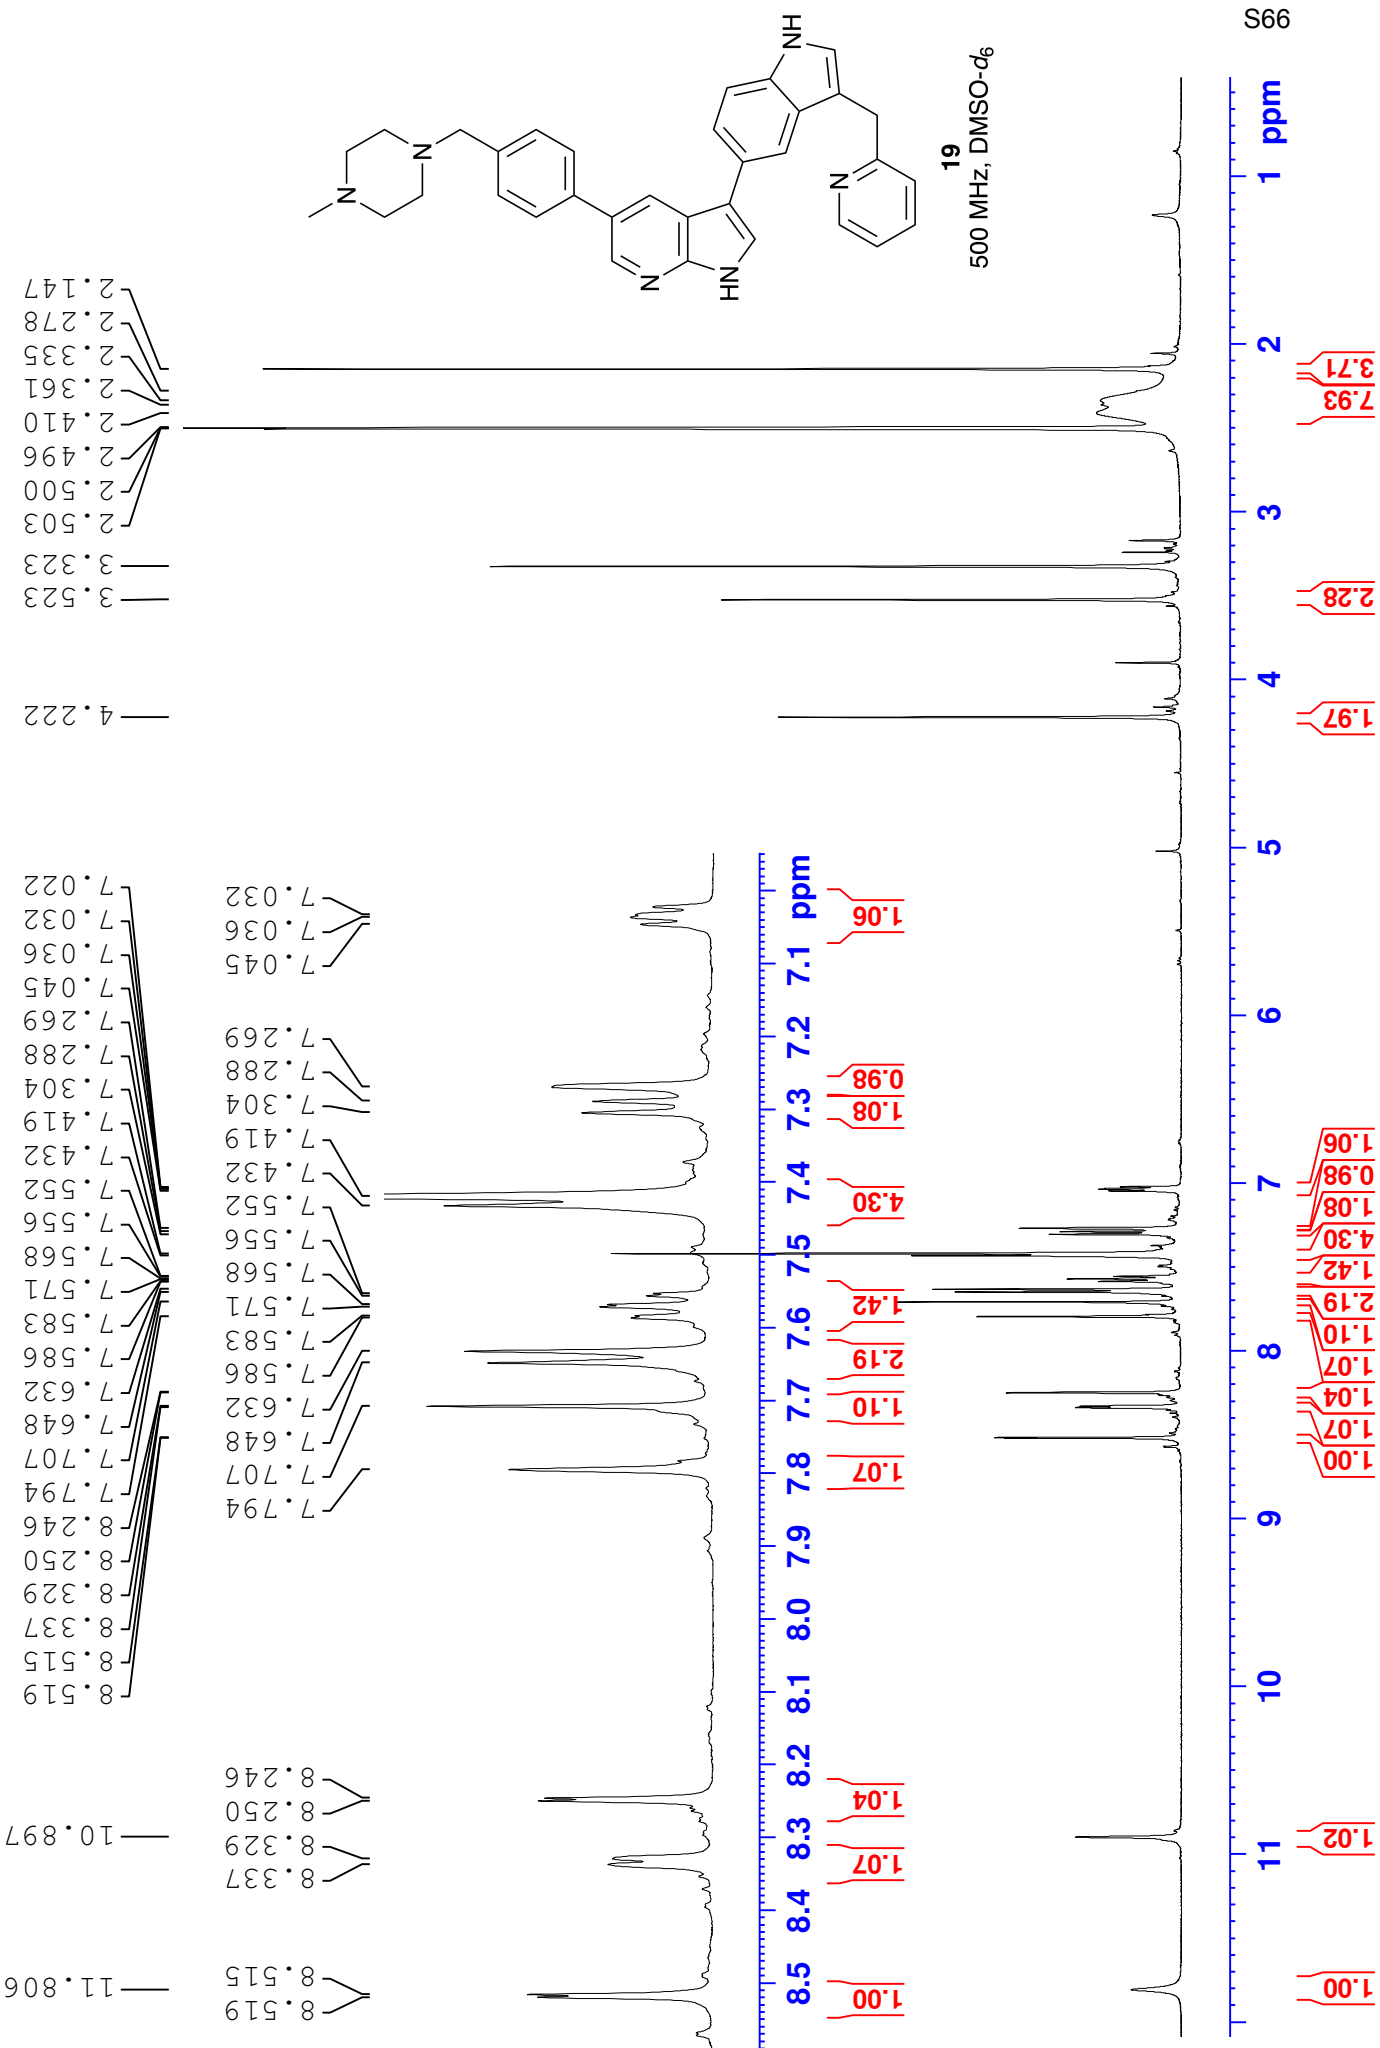

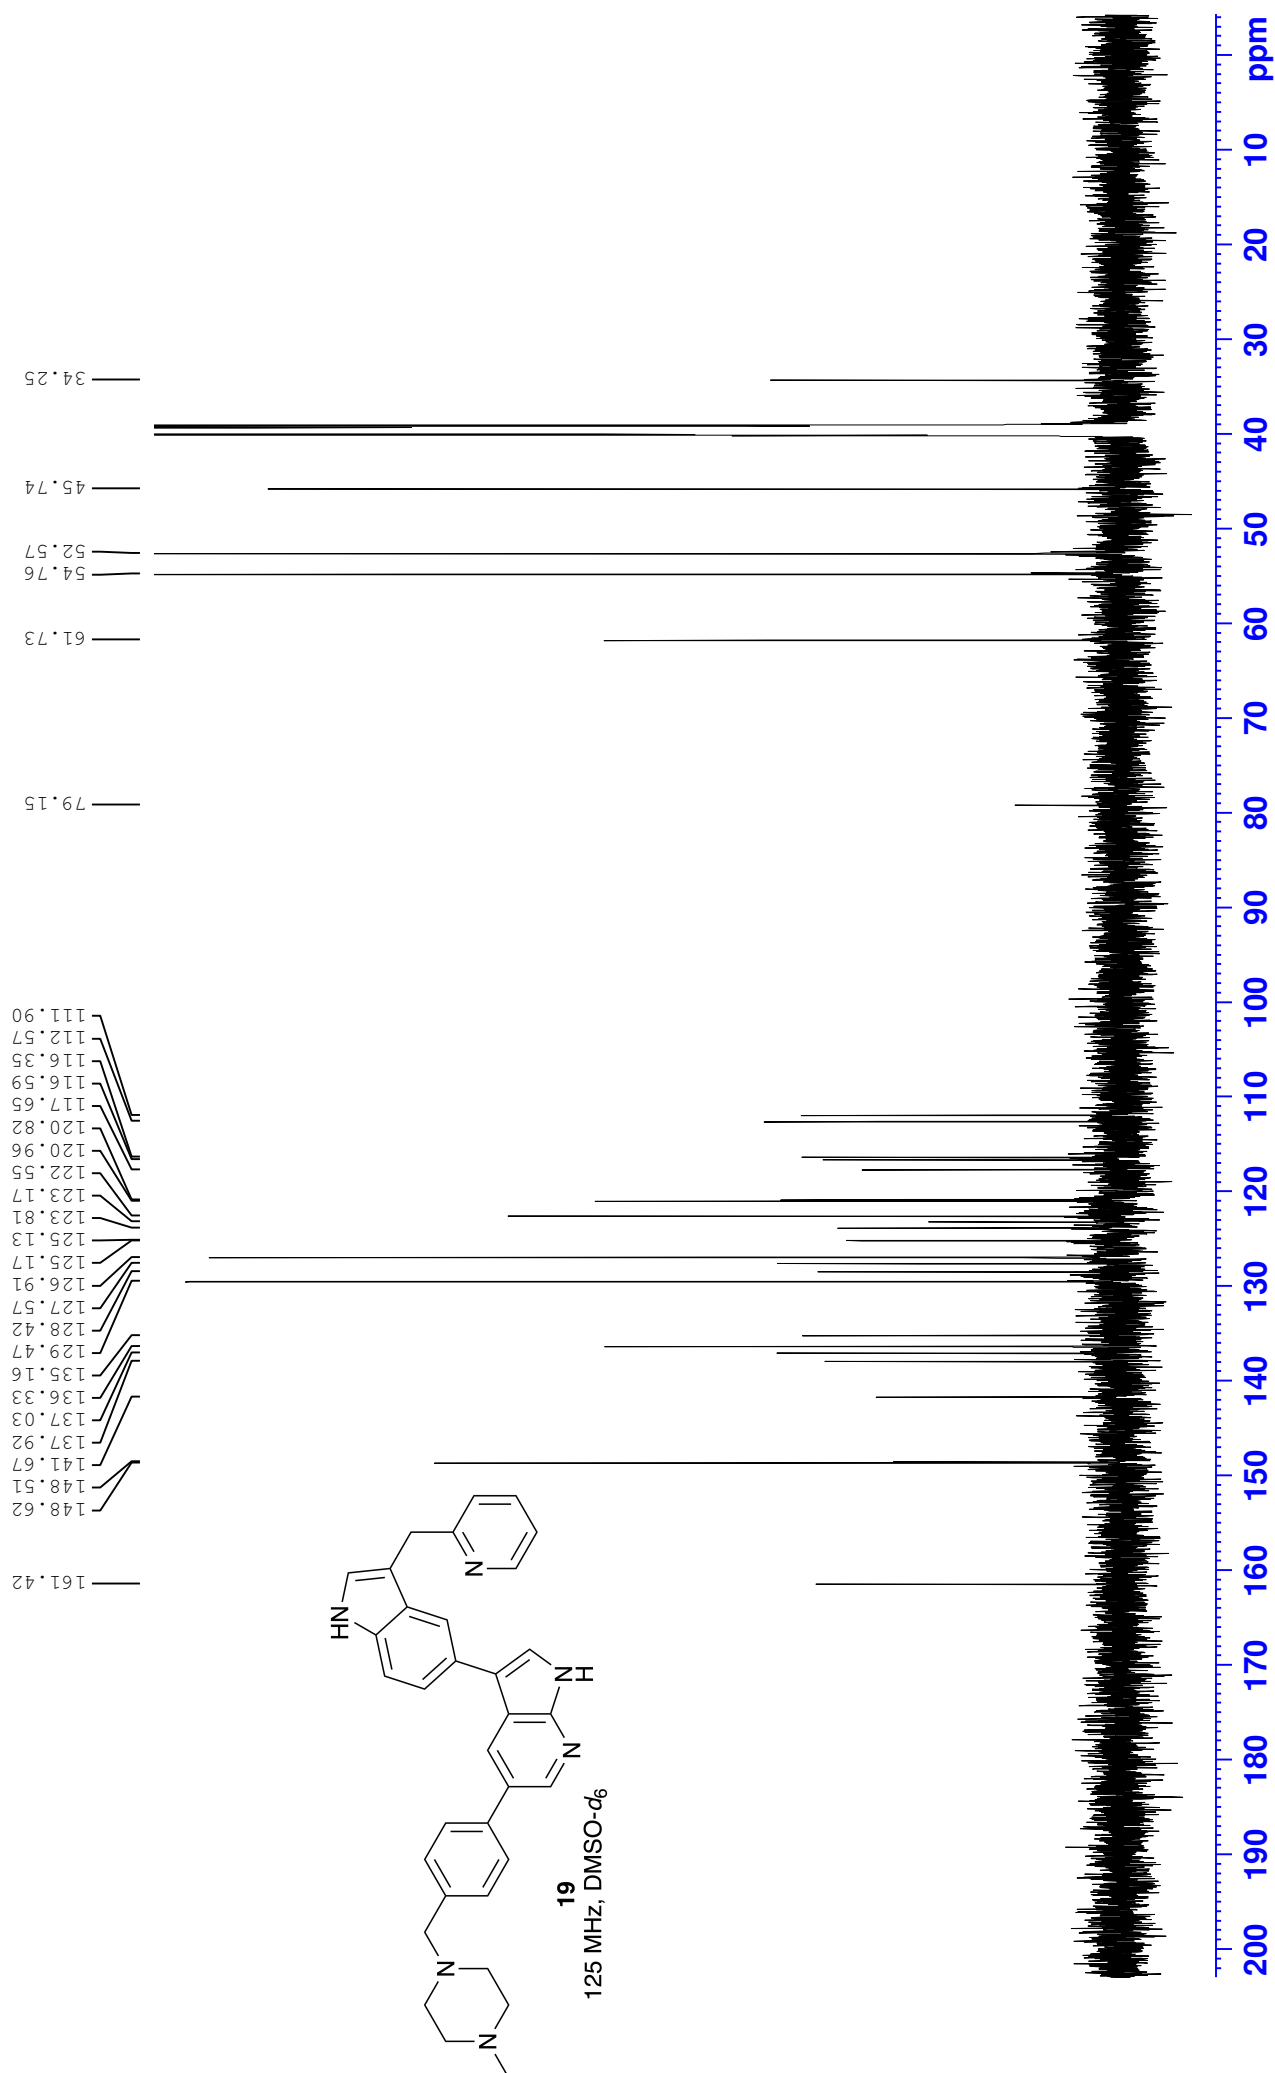

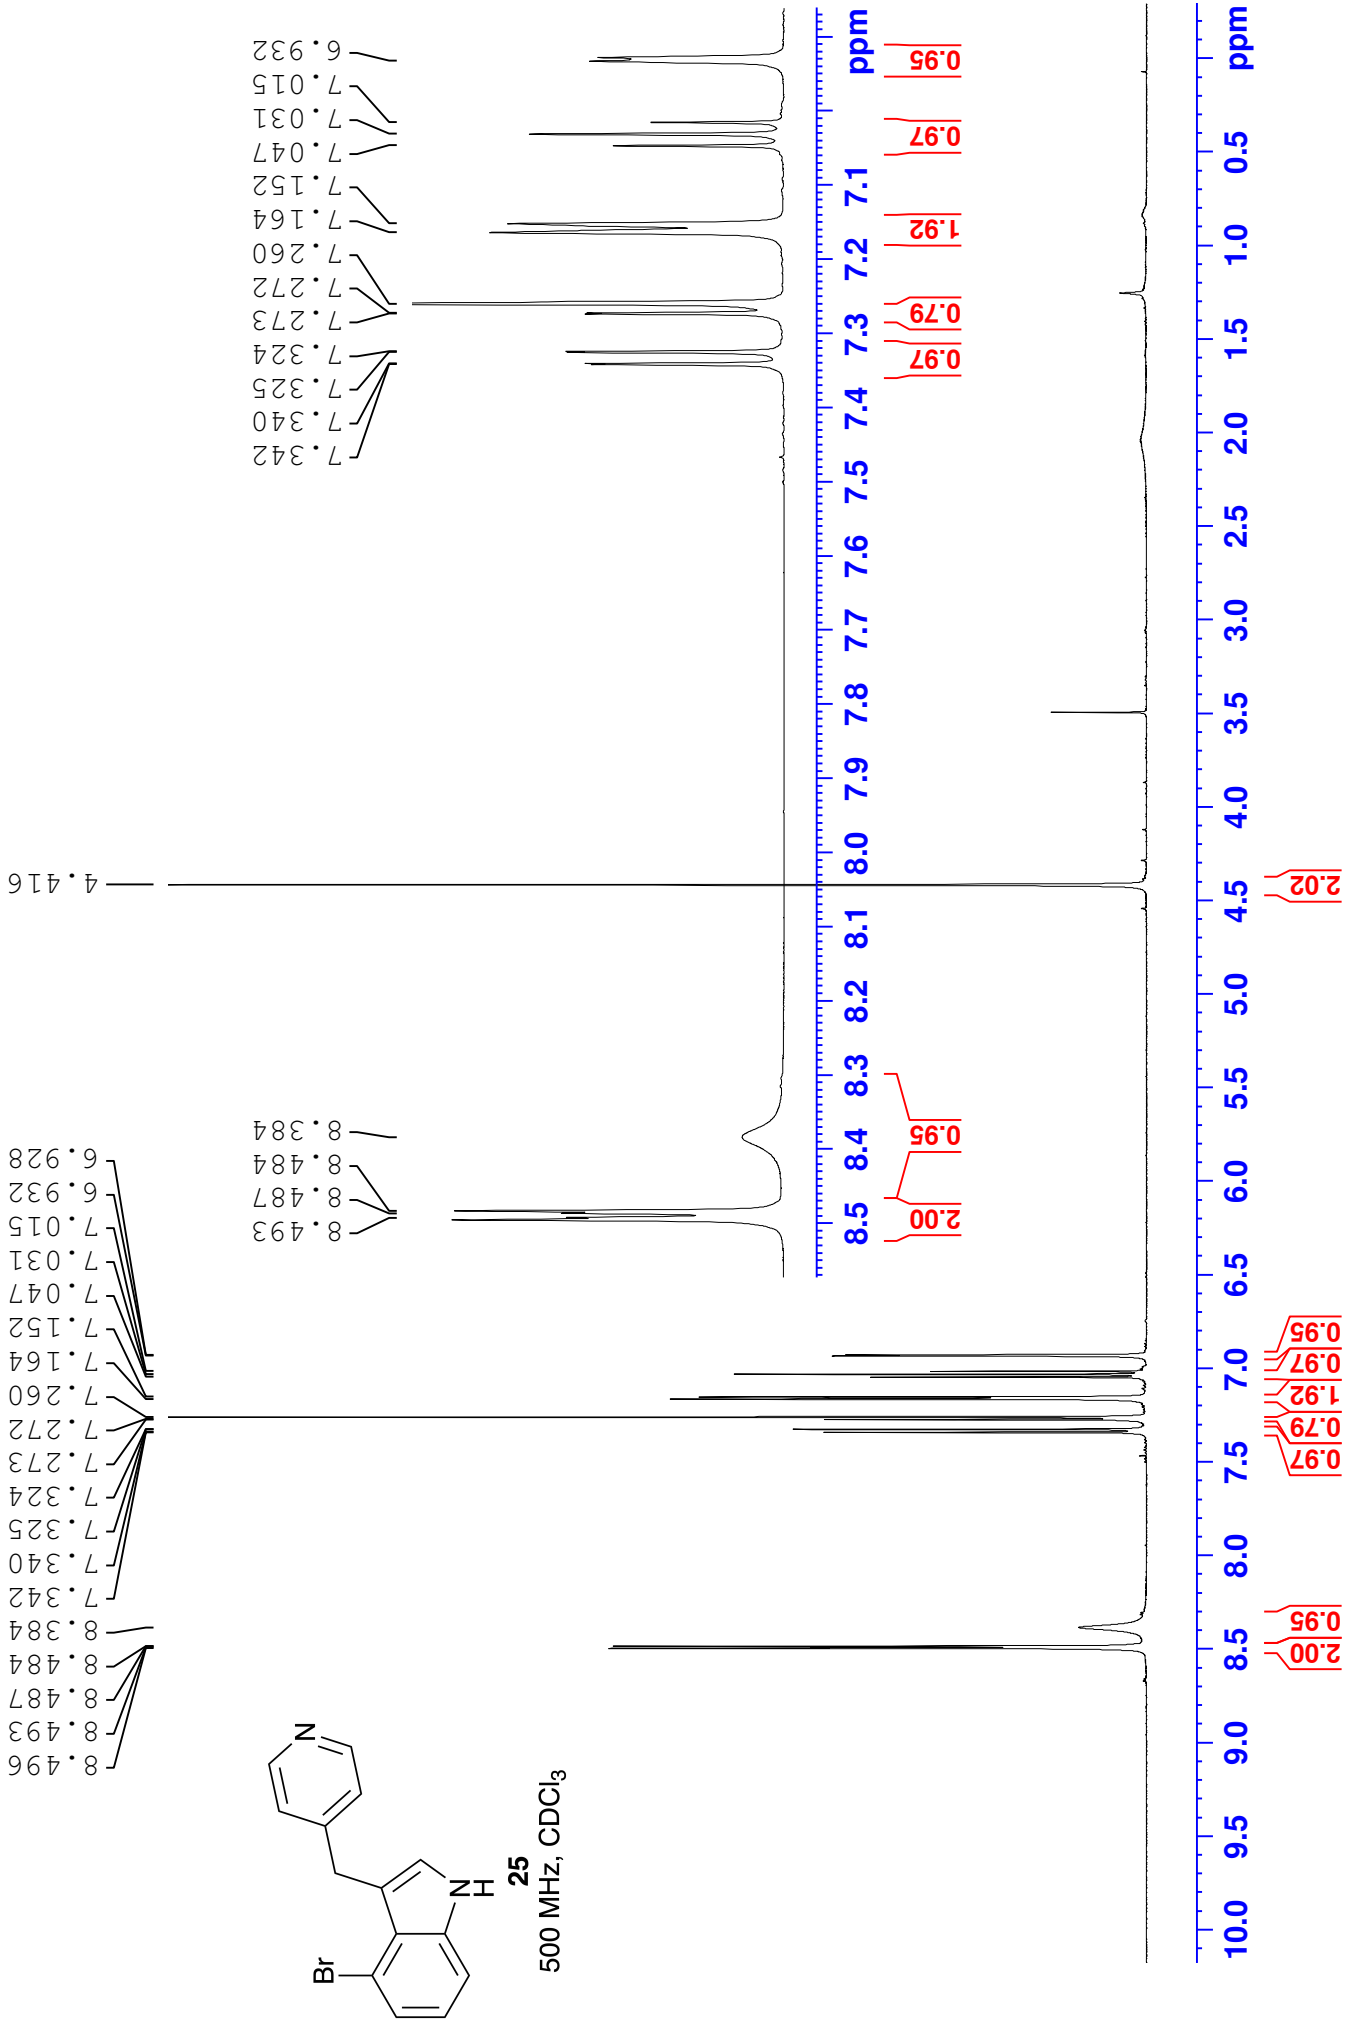

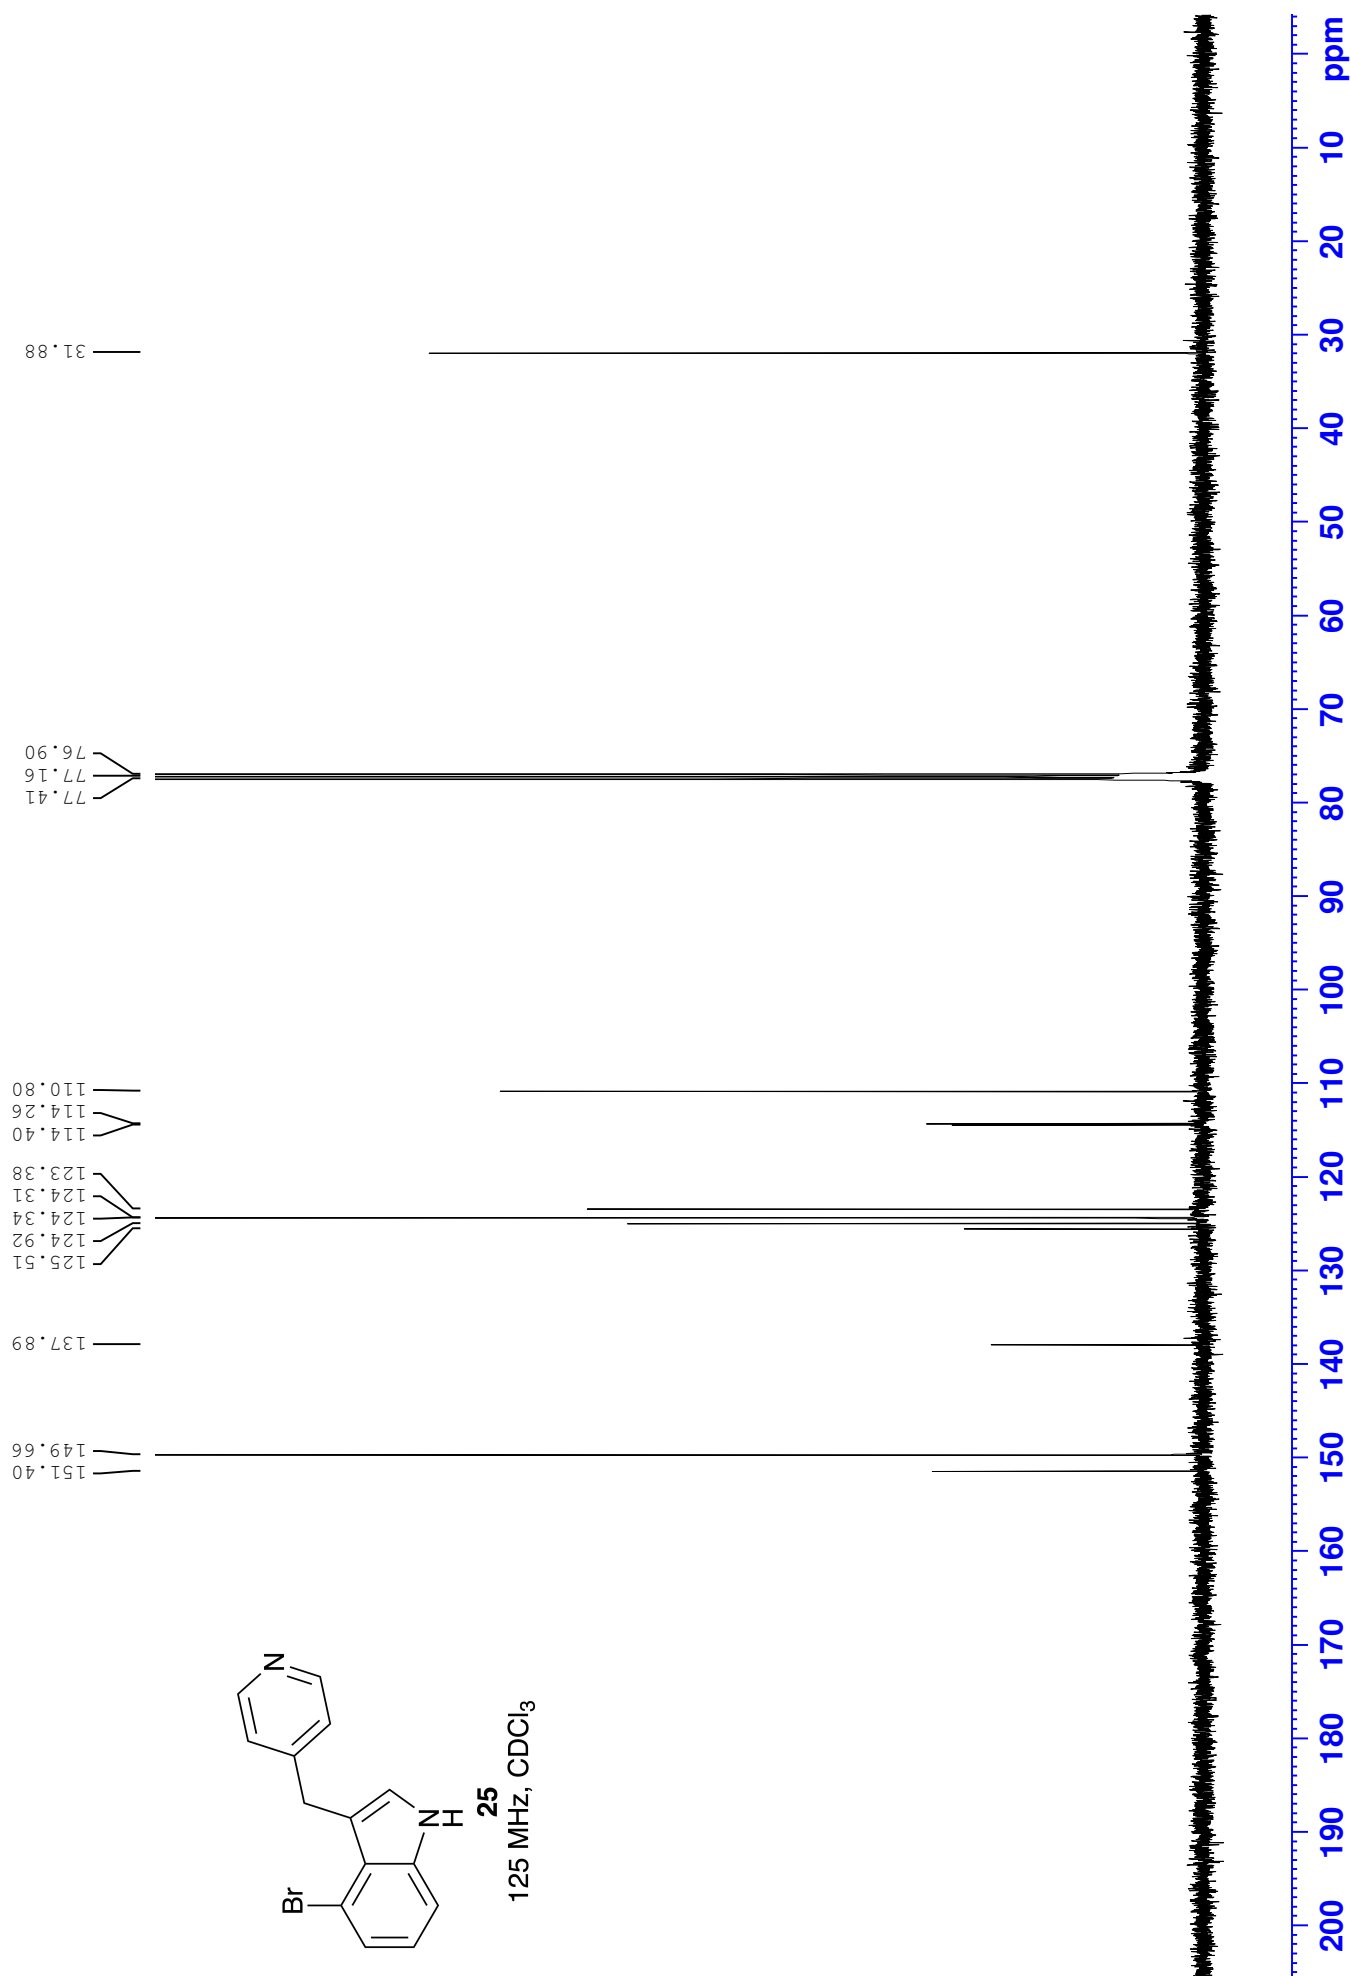

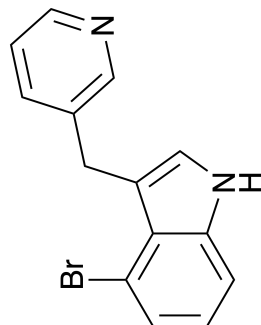

**26**

400 MHz, DMSO-d<sub>6</sub>

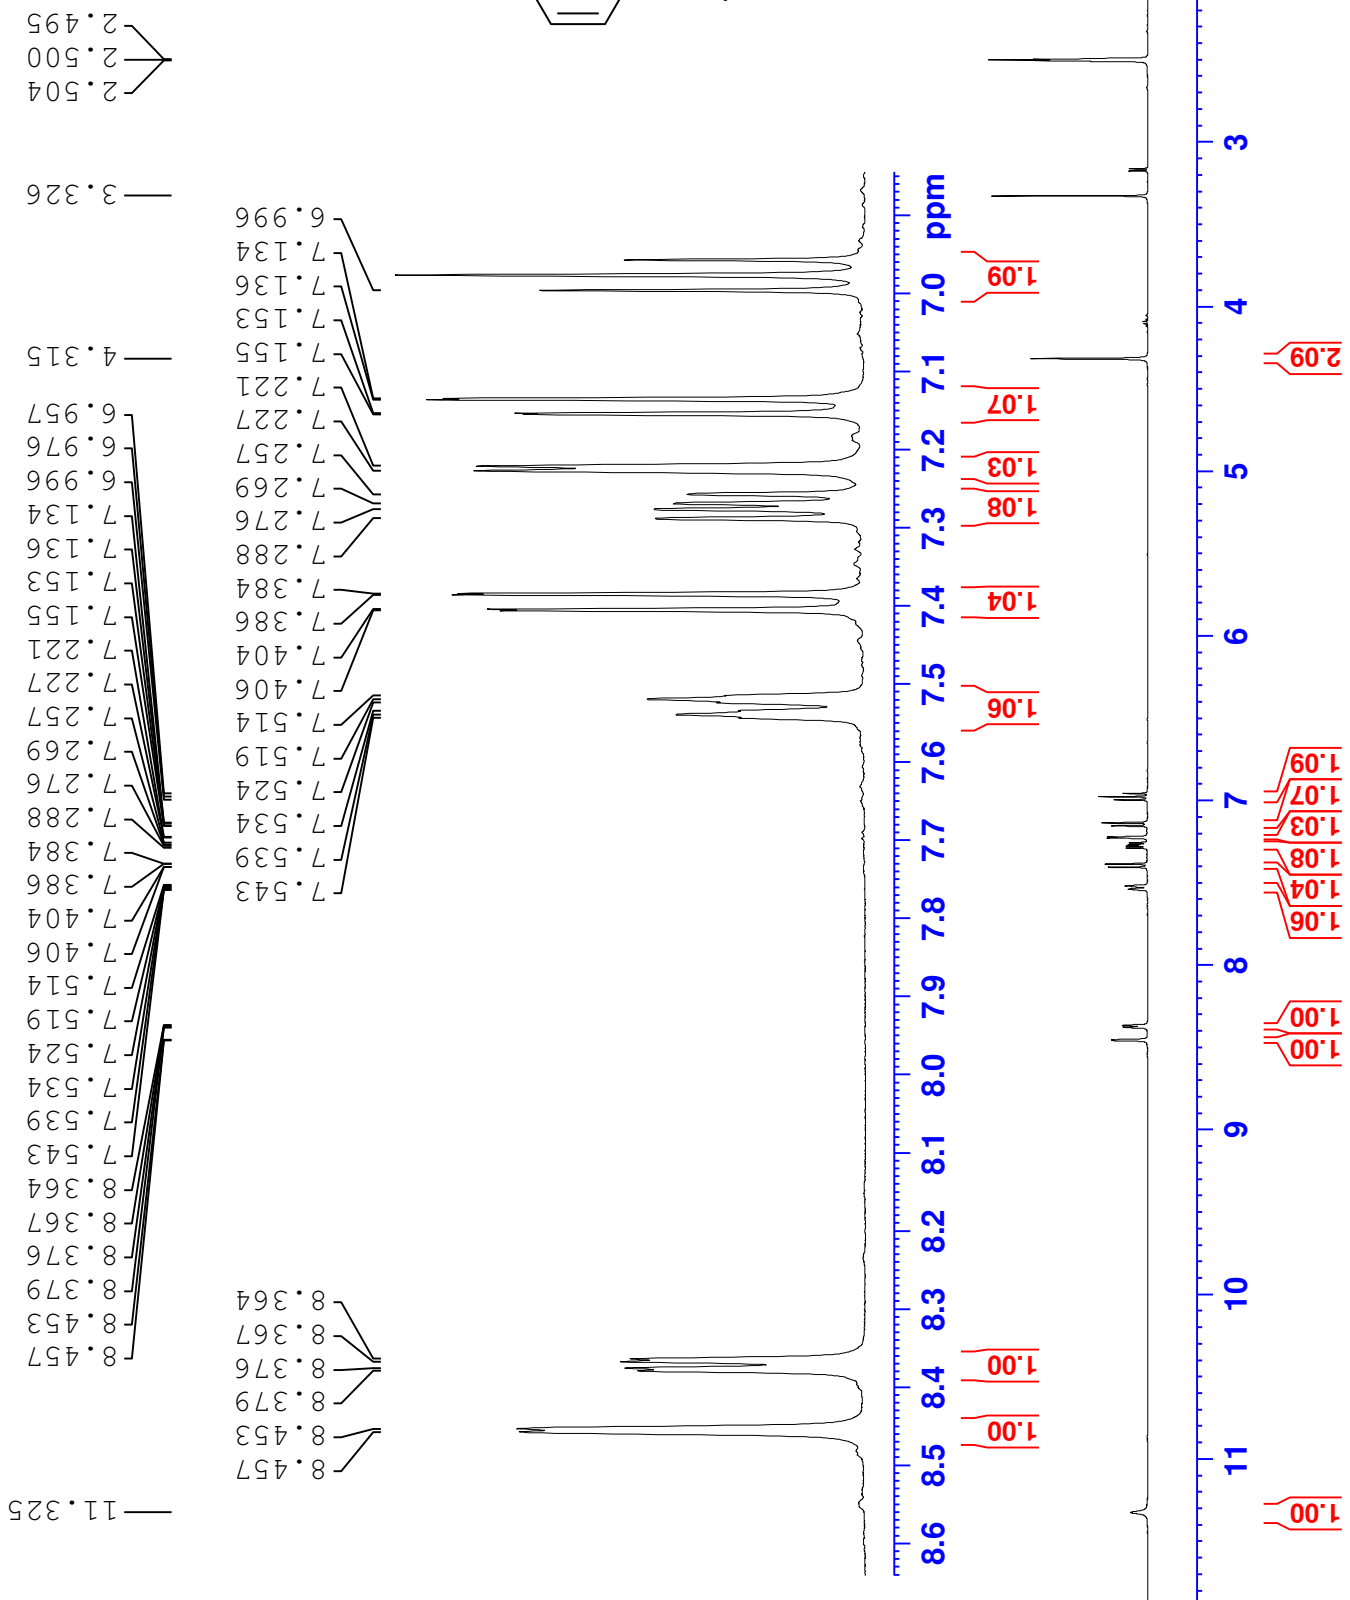

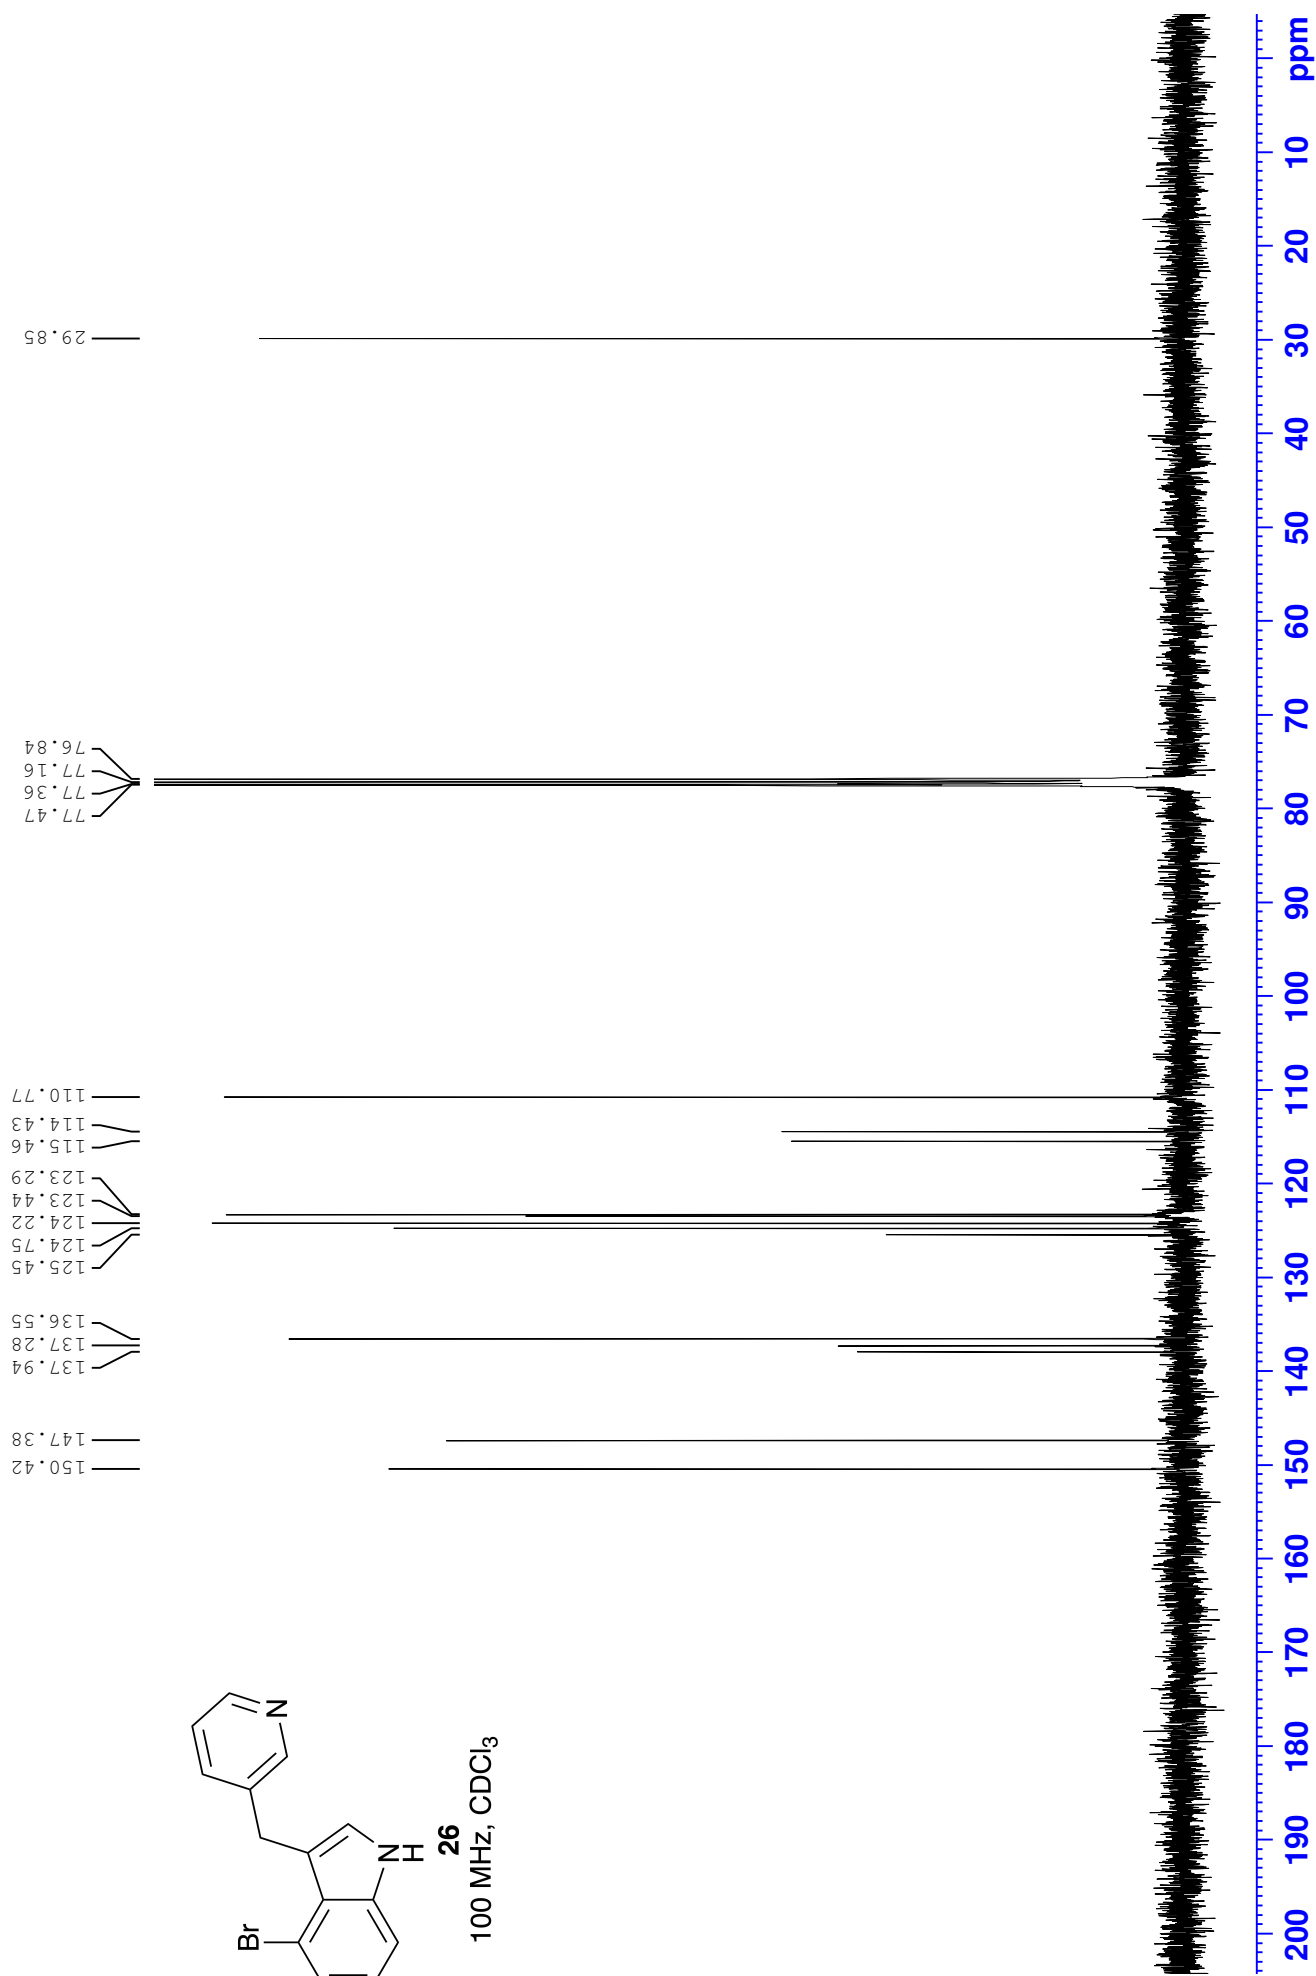

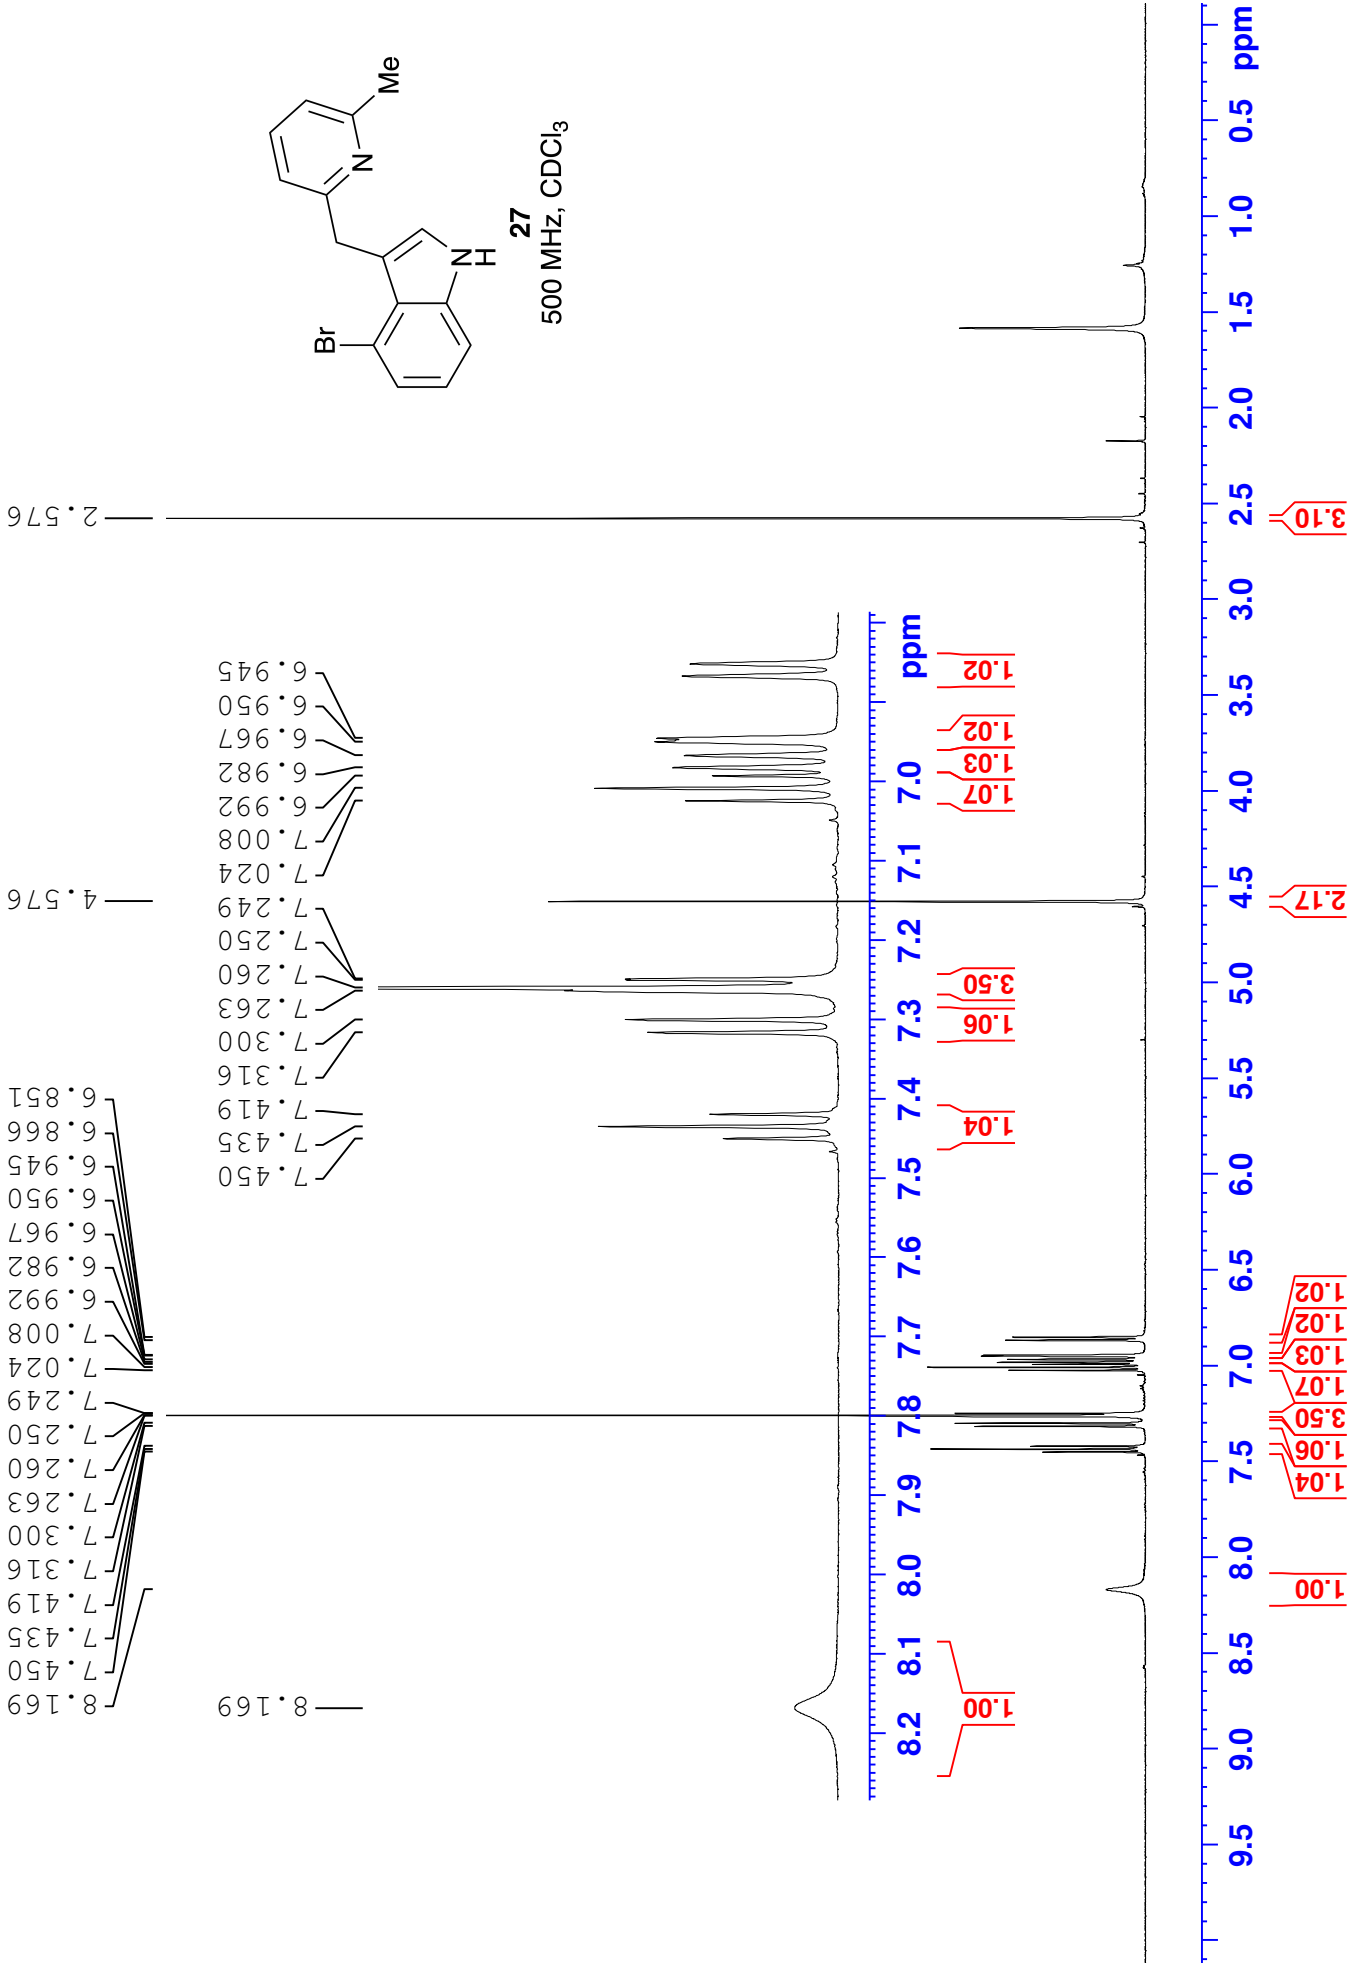



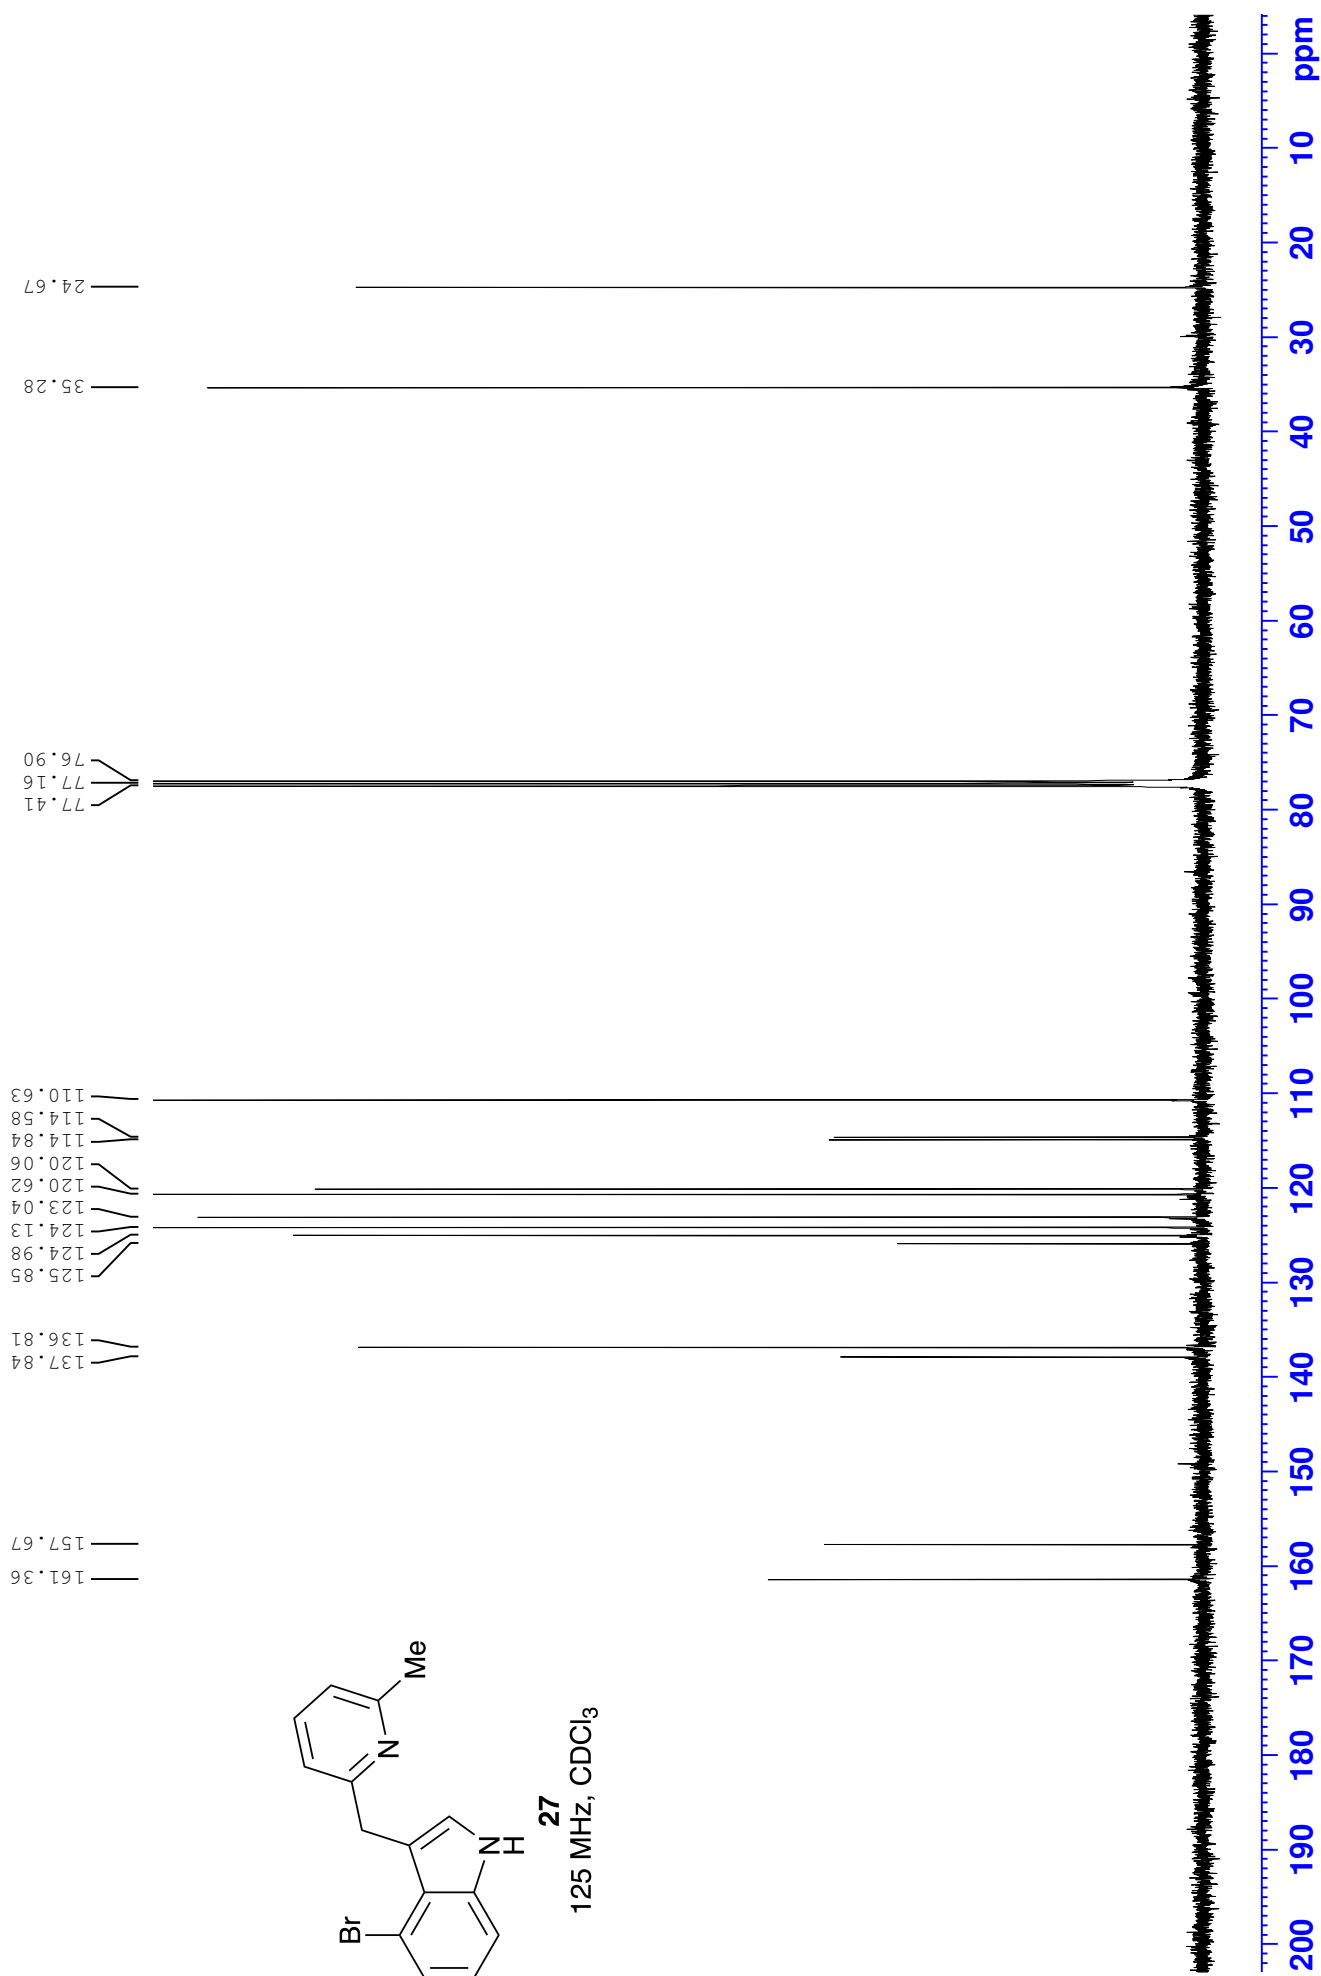

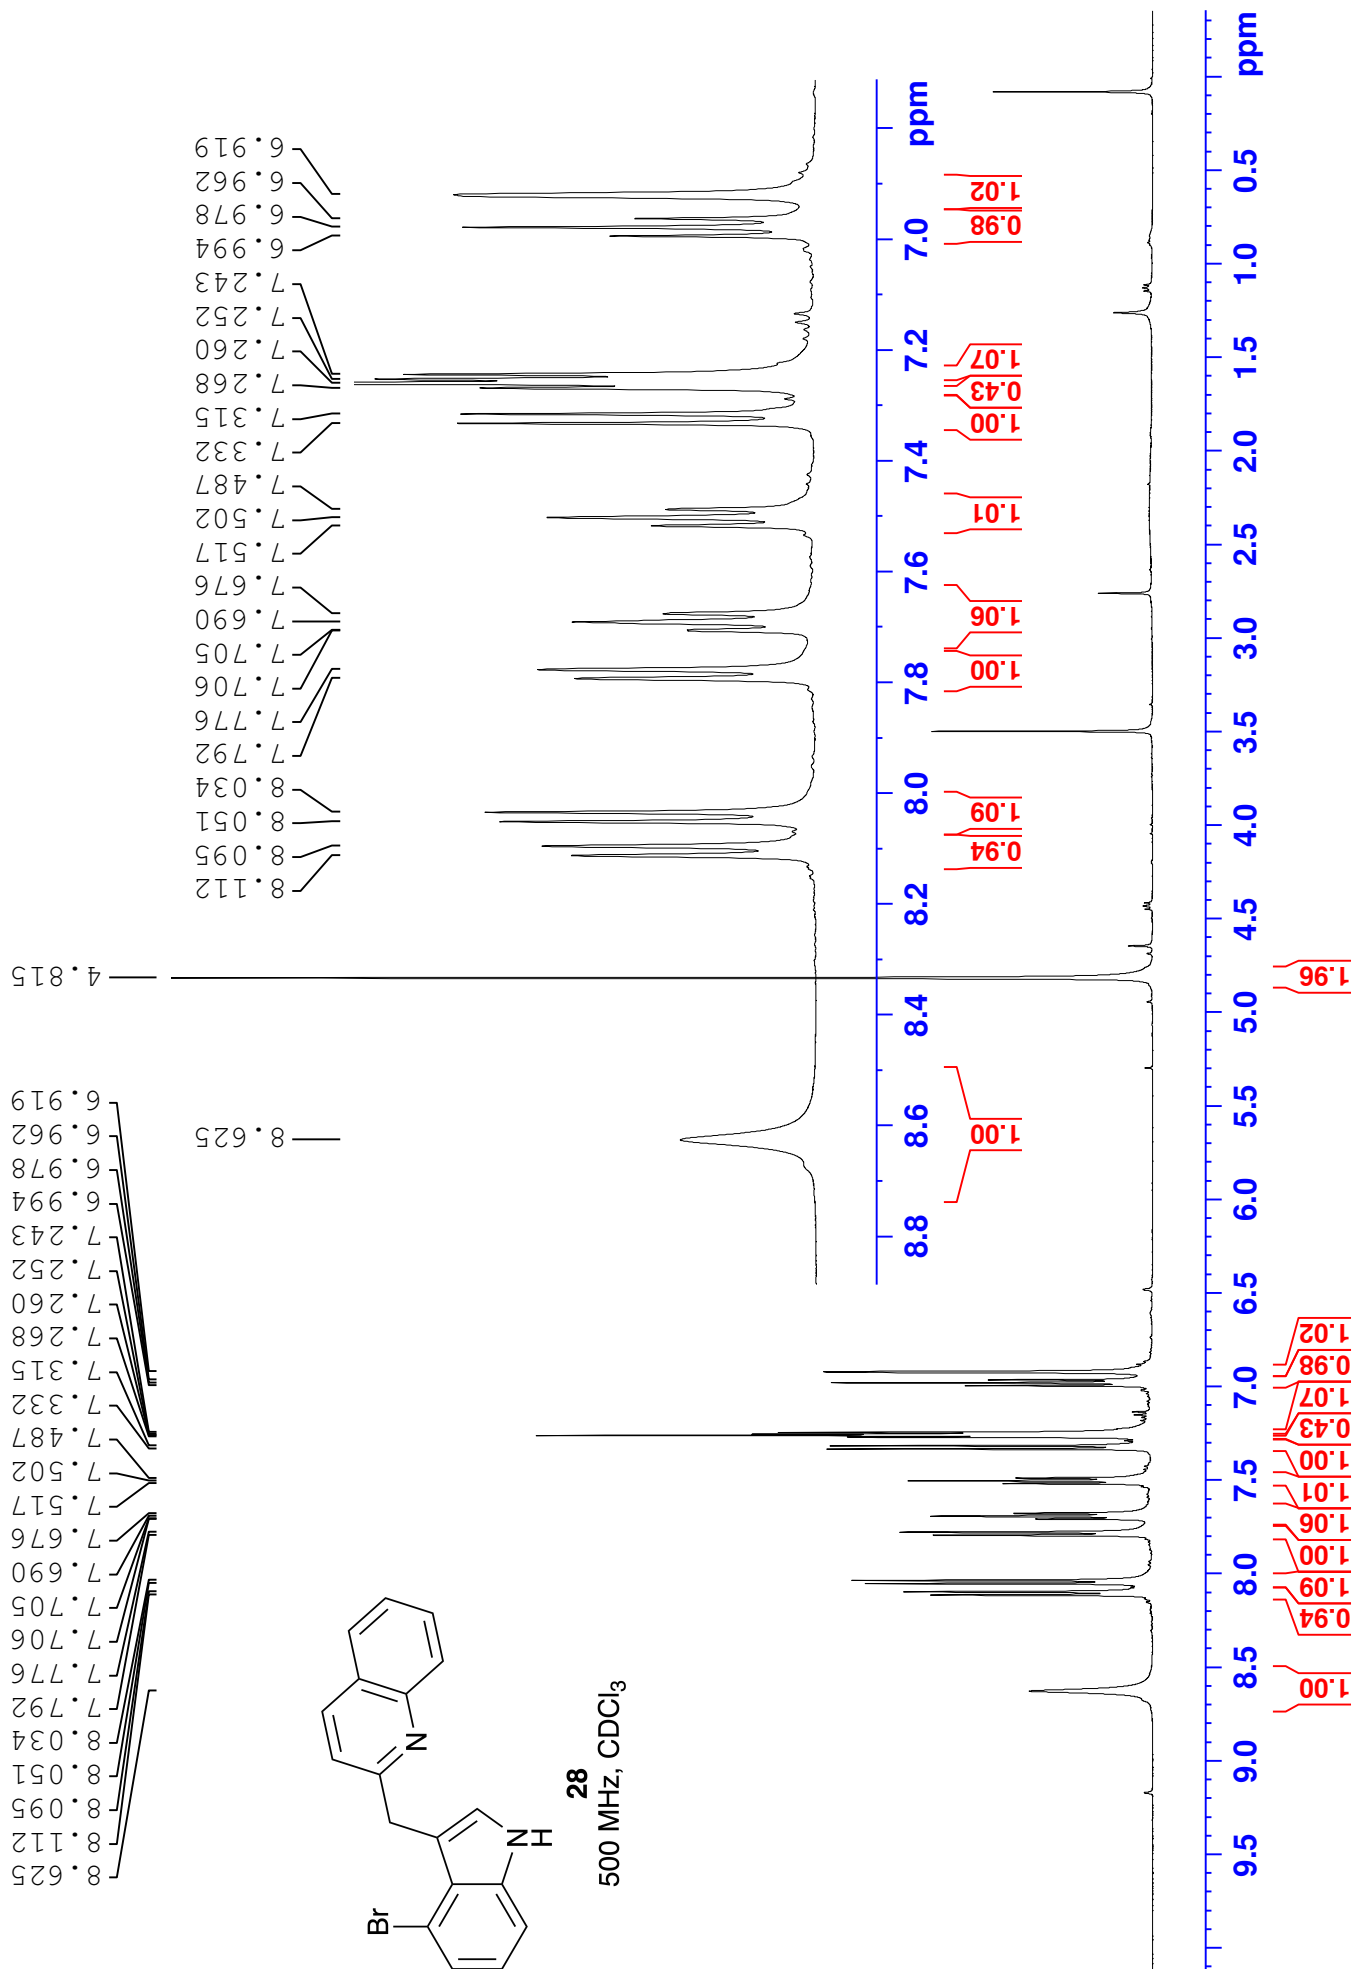

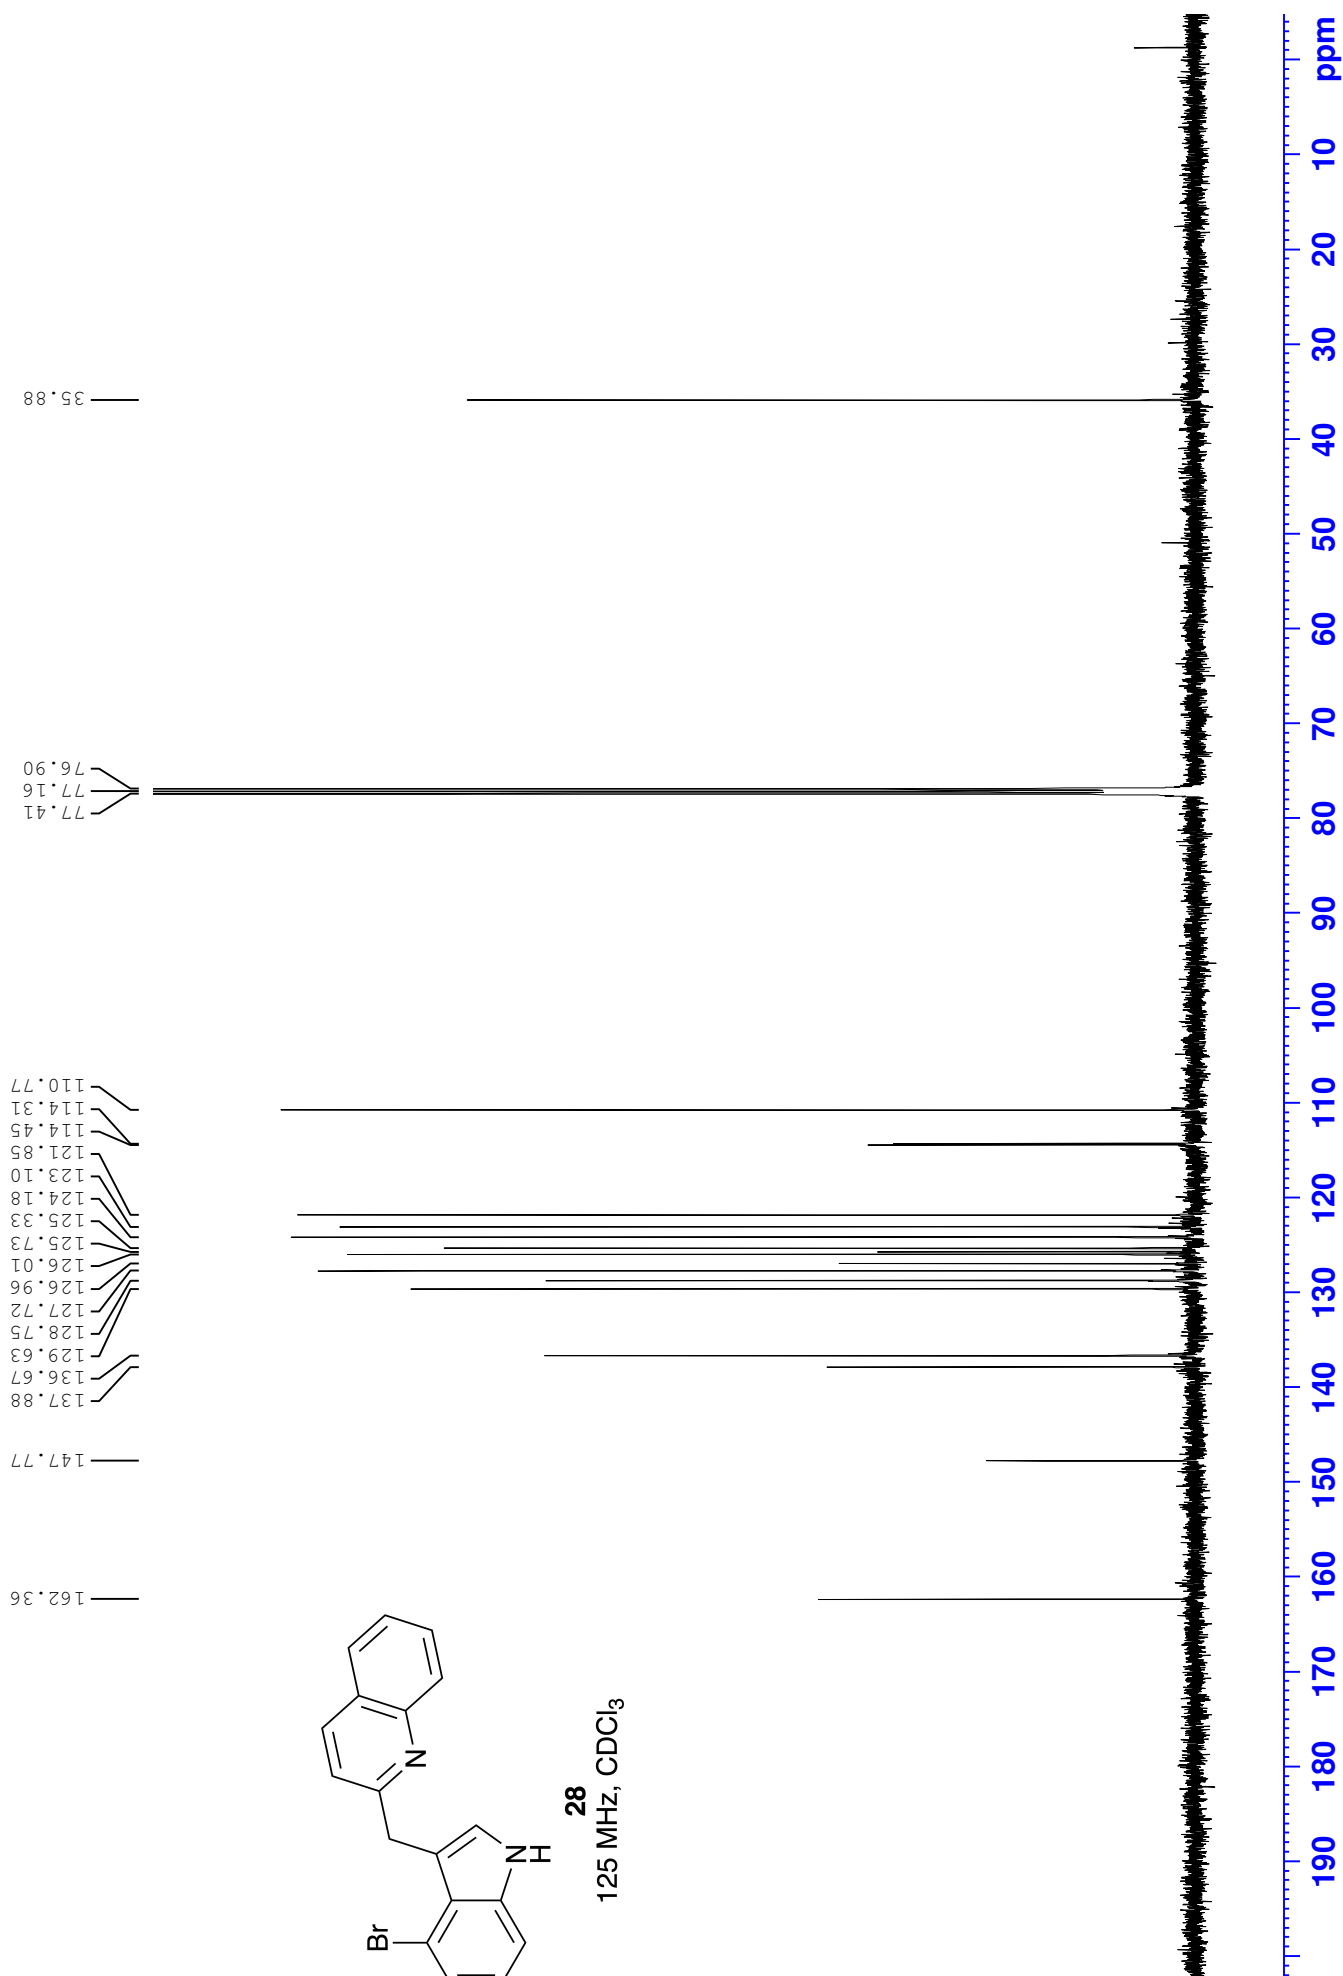

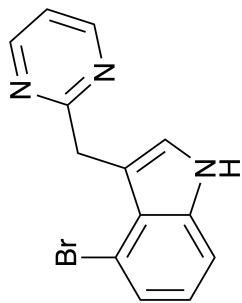

**29**  
400 MHz, DMSO-*d*<sub>6</sub>

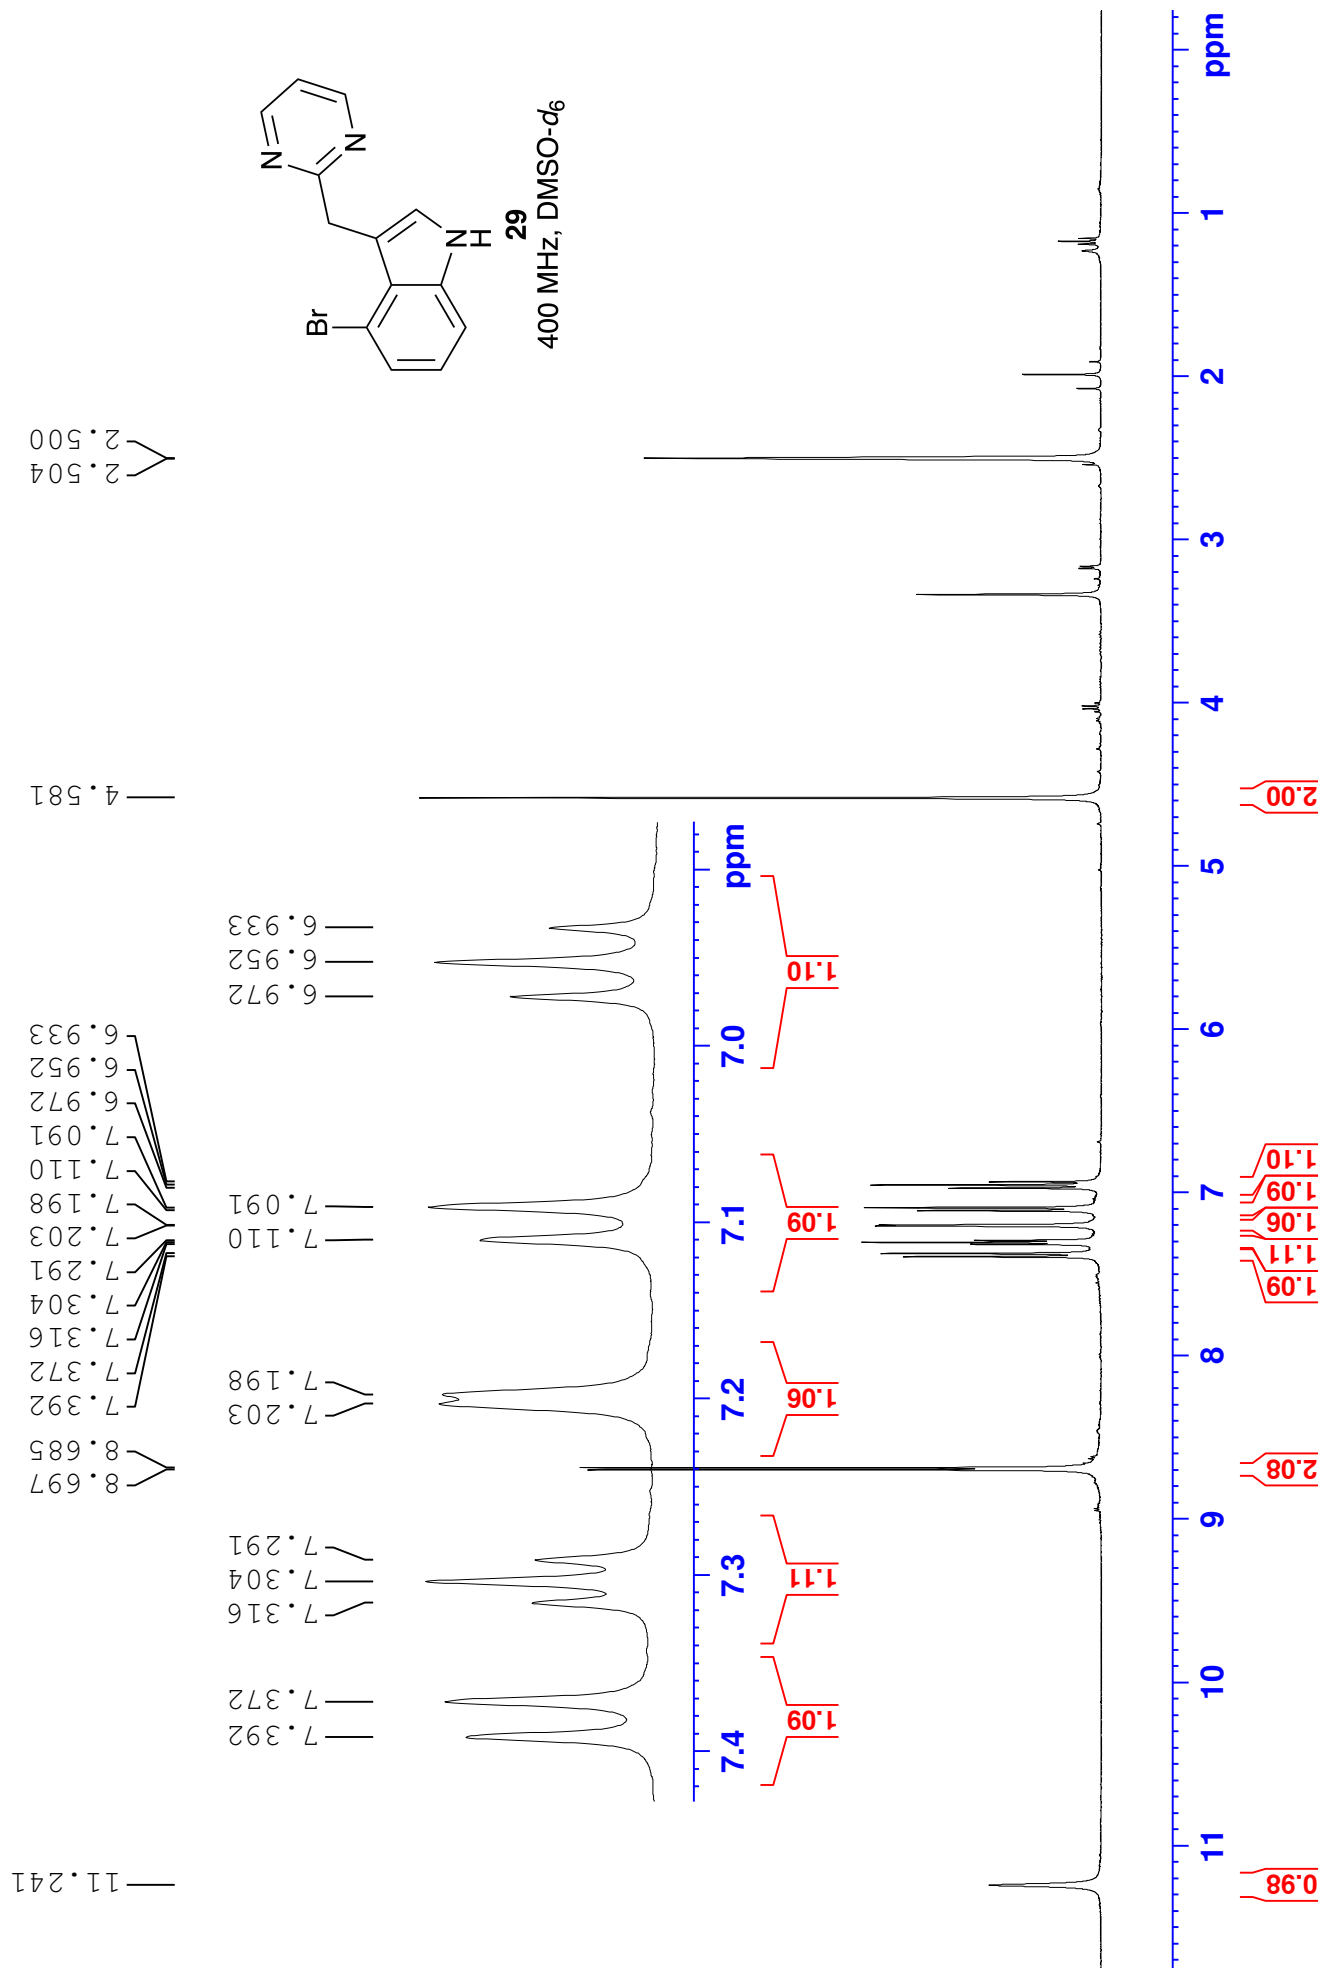

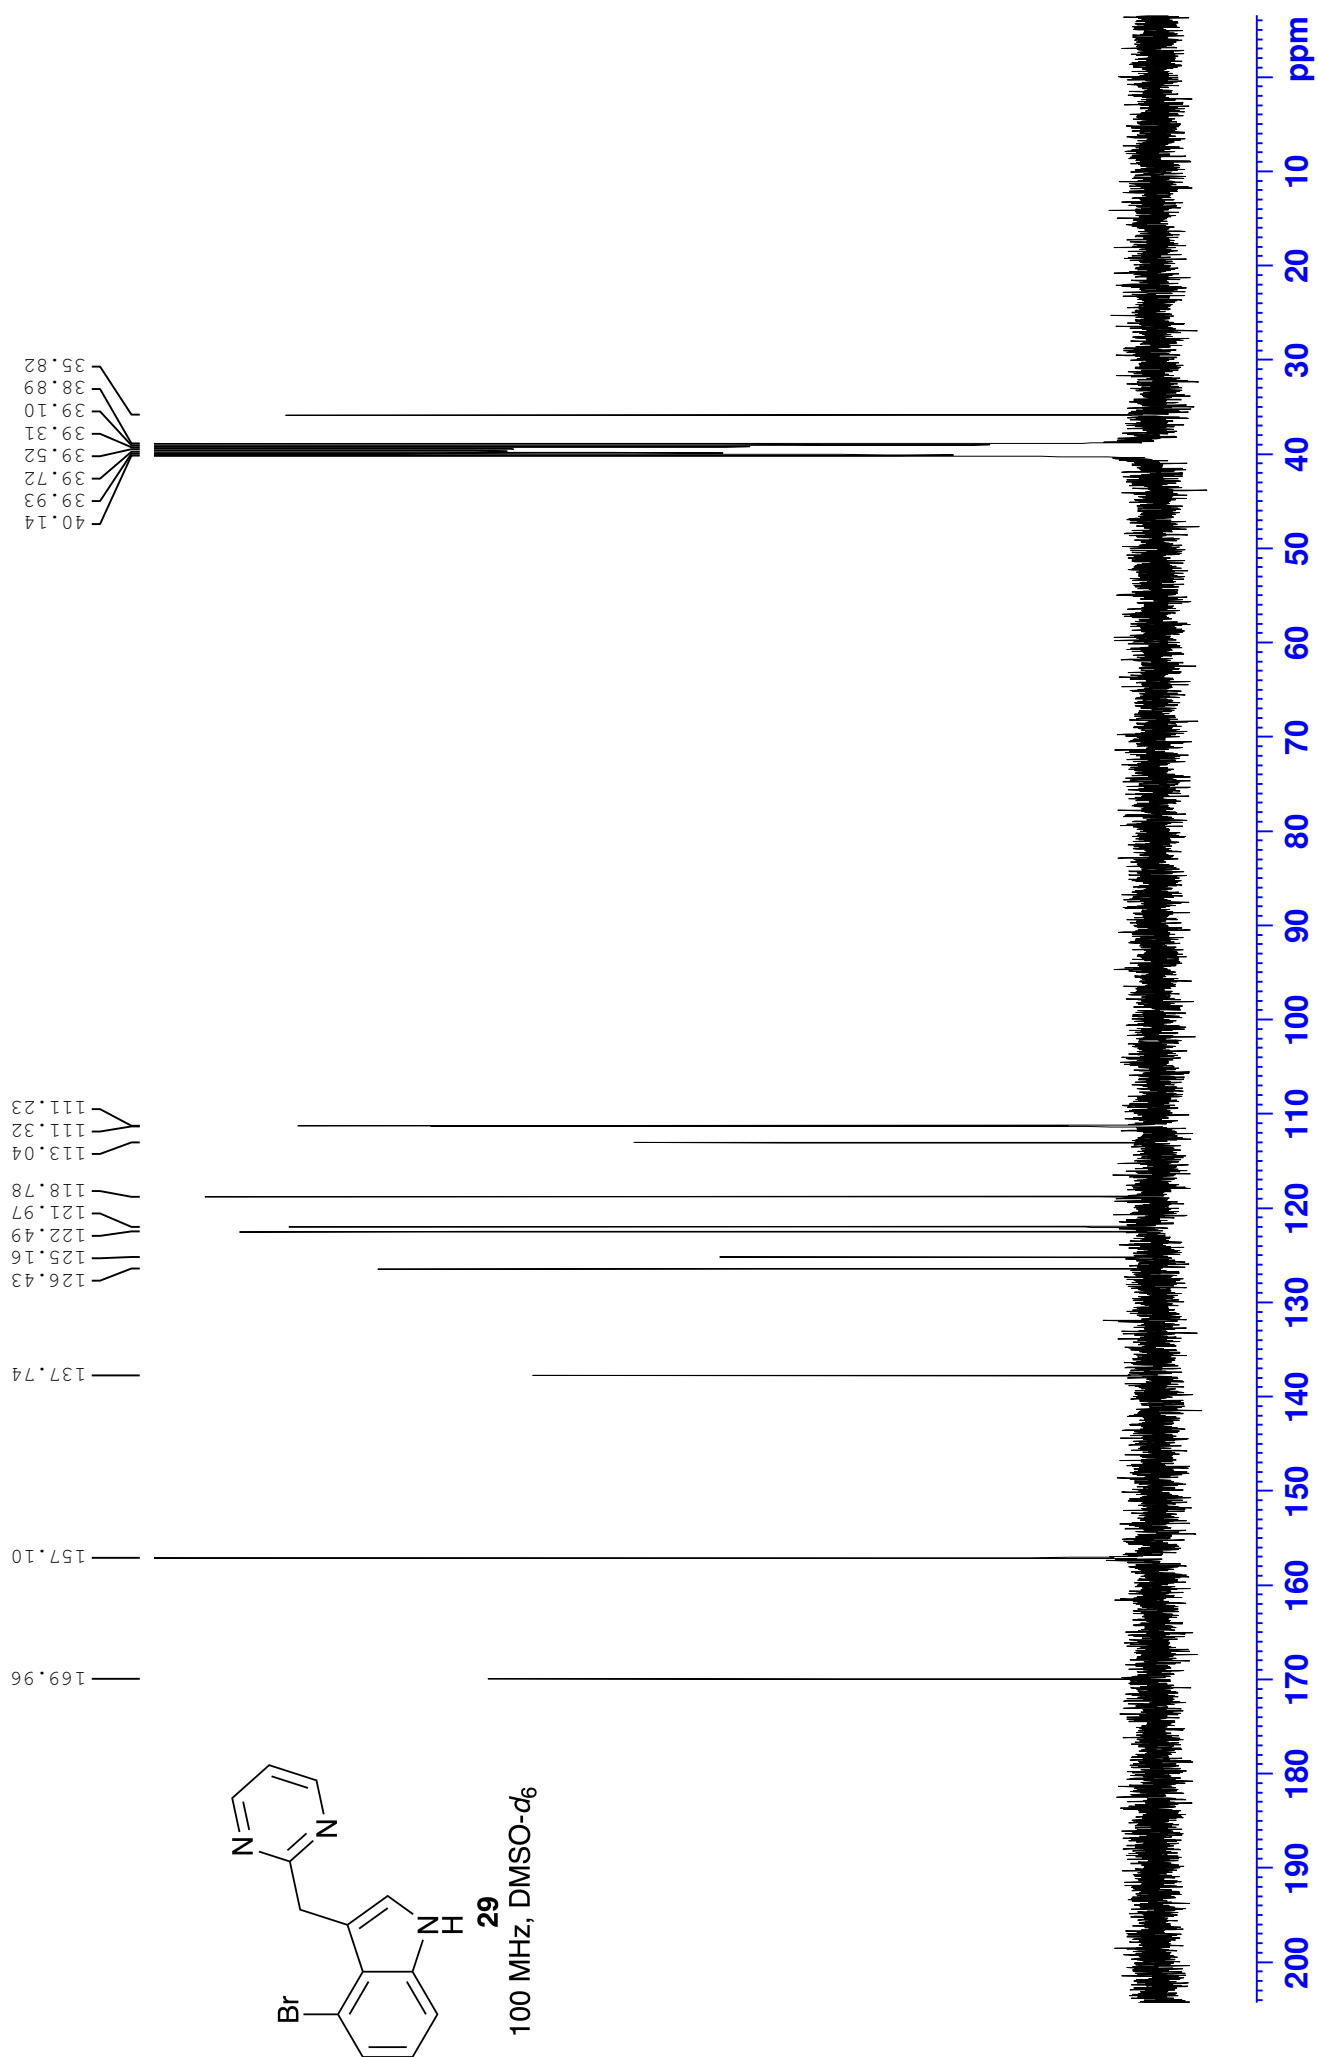

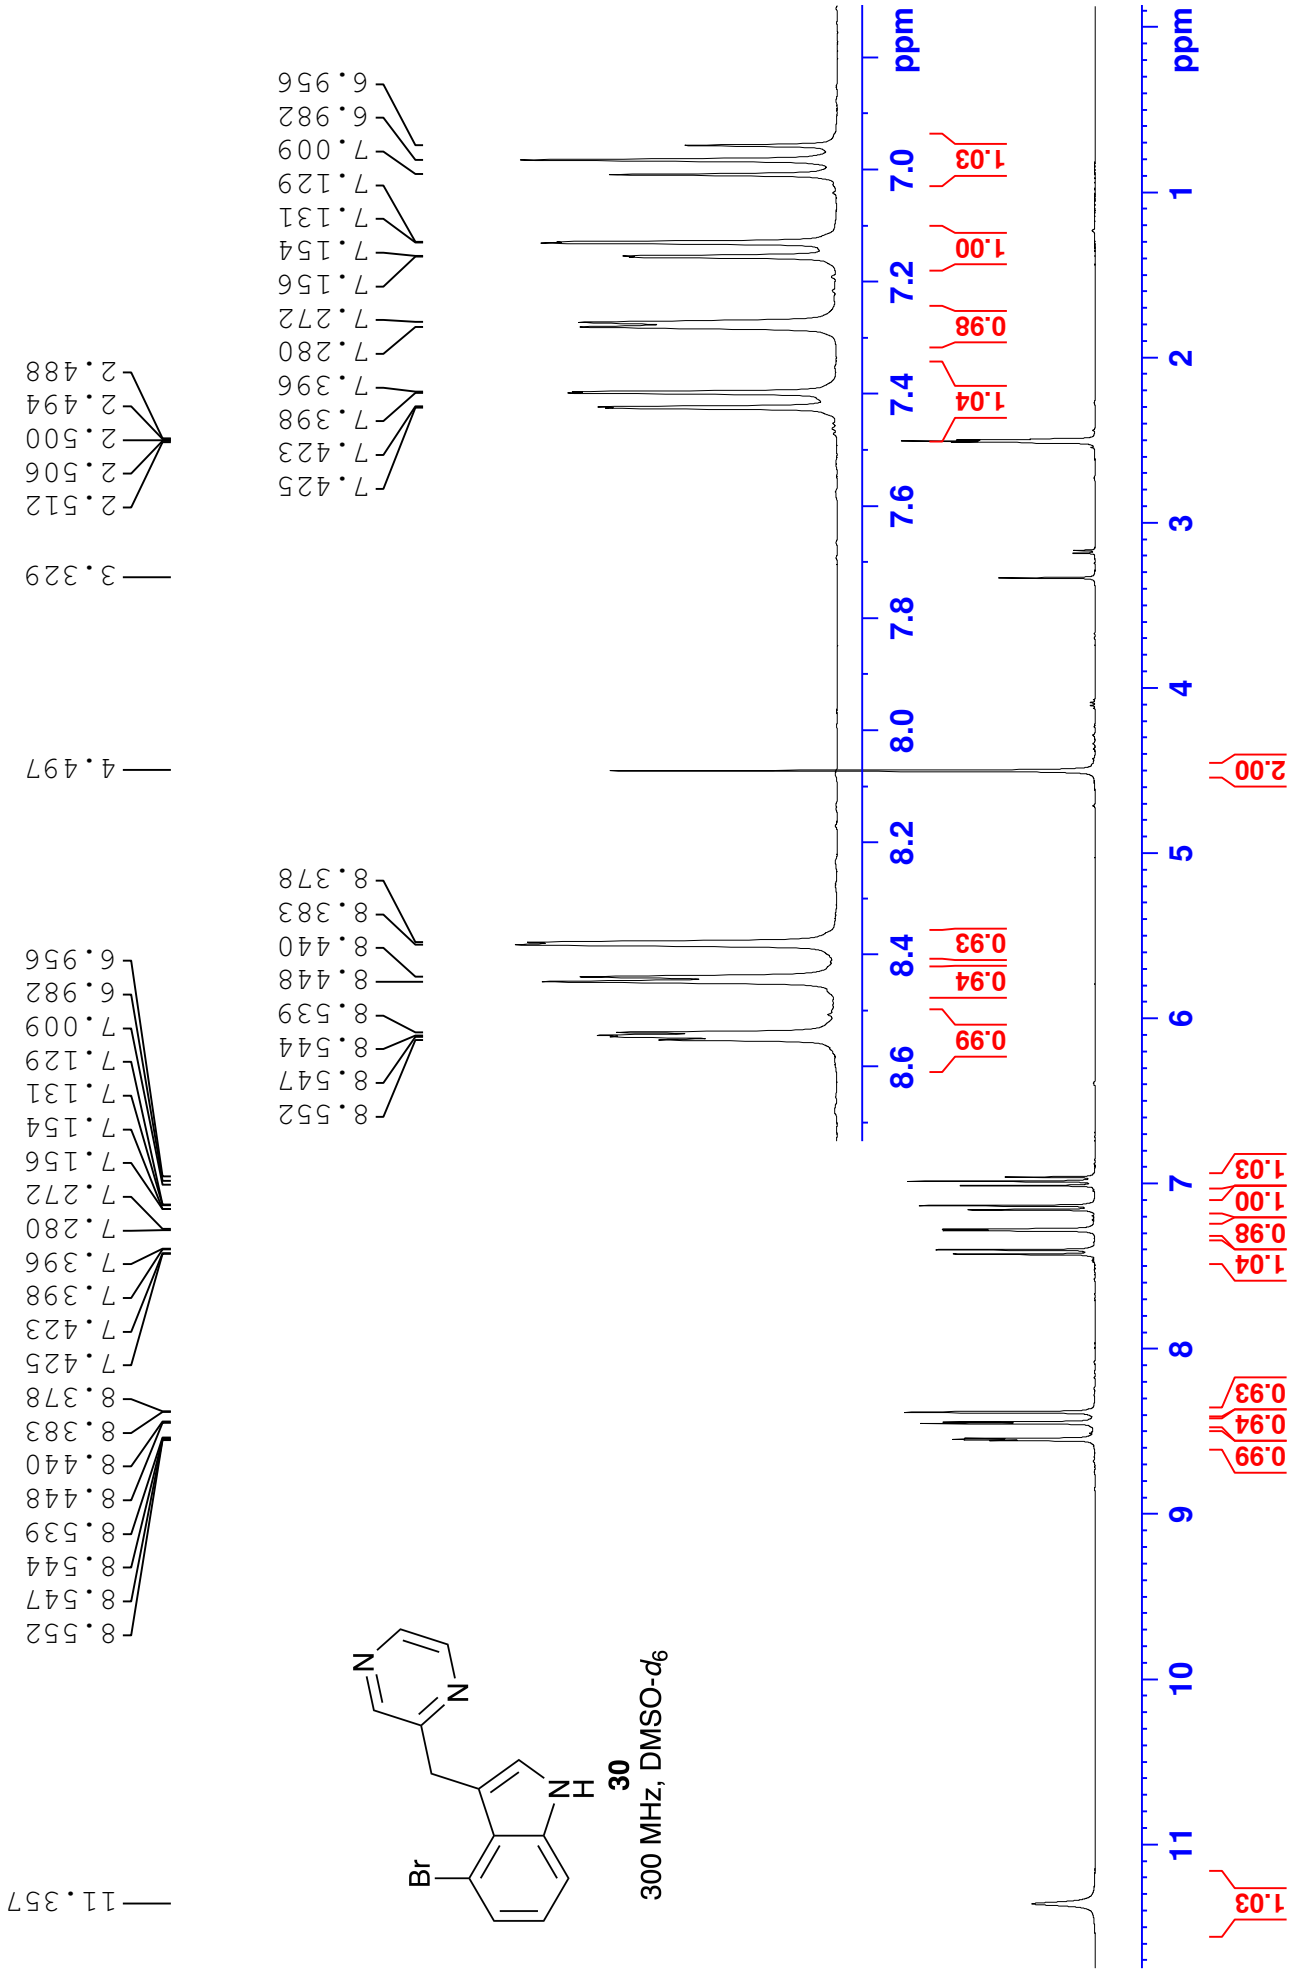

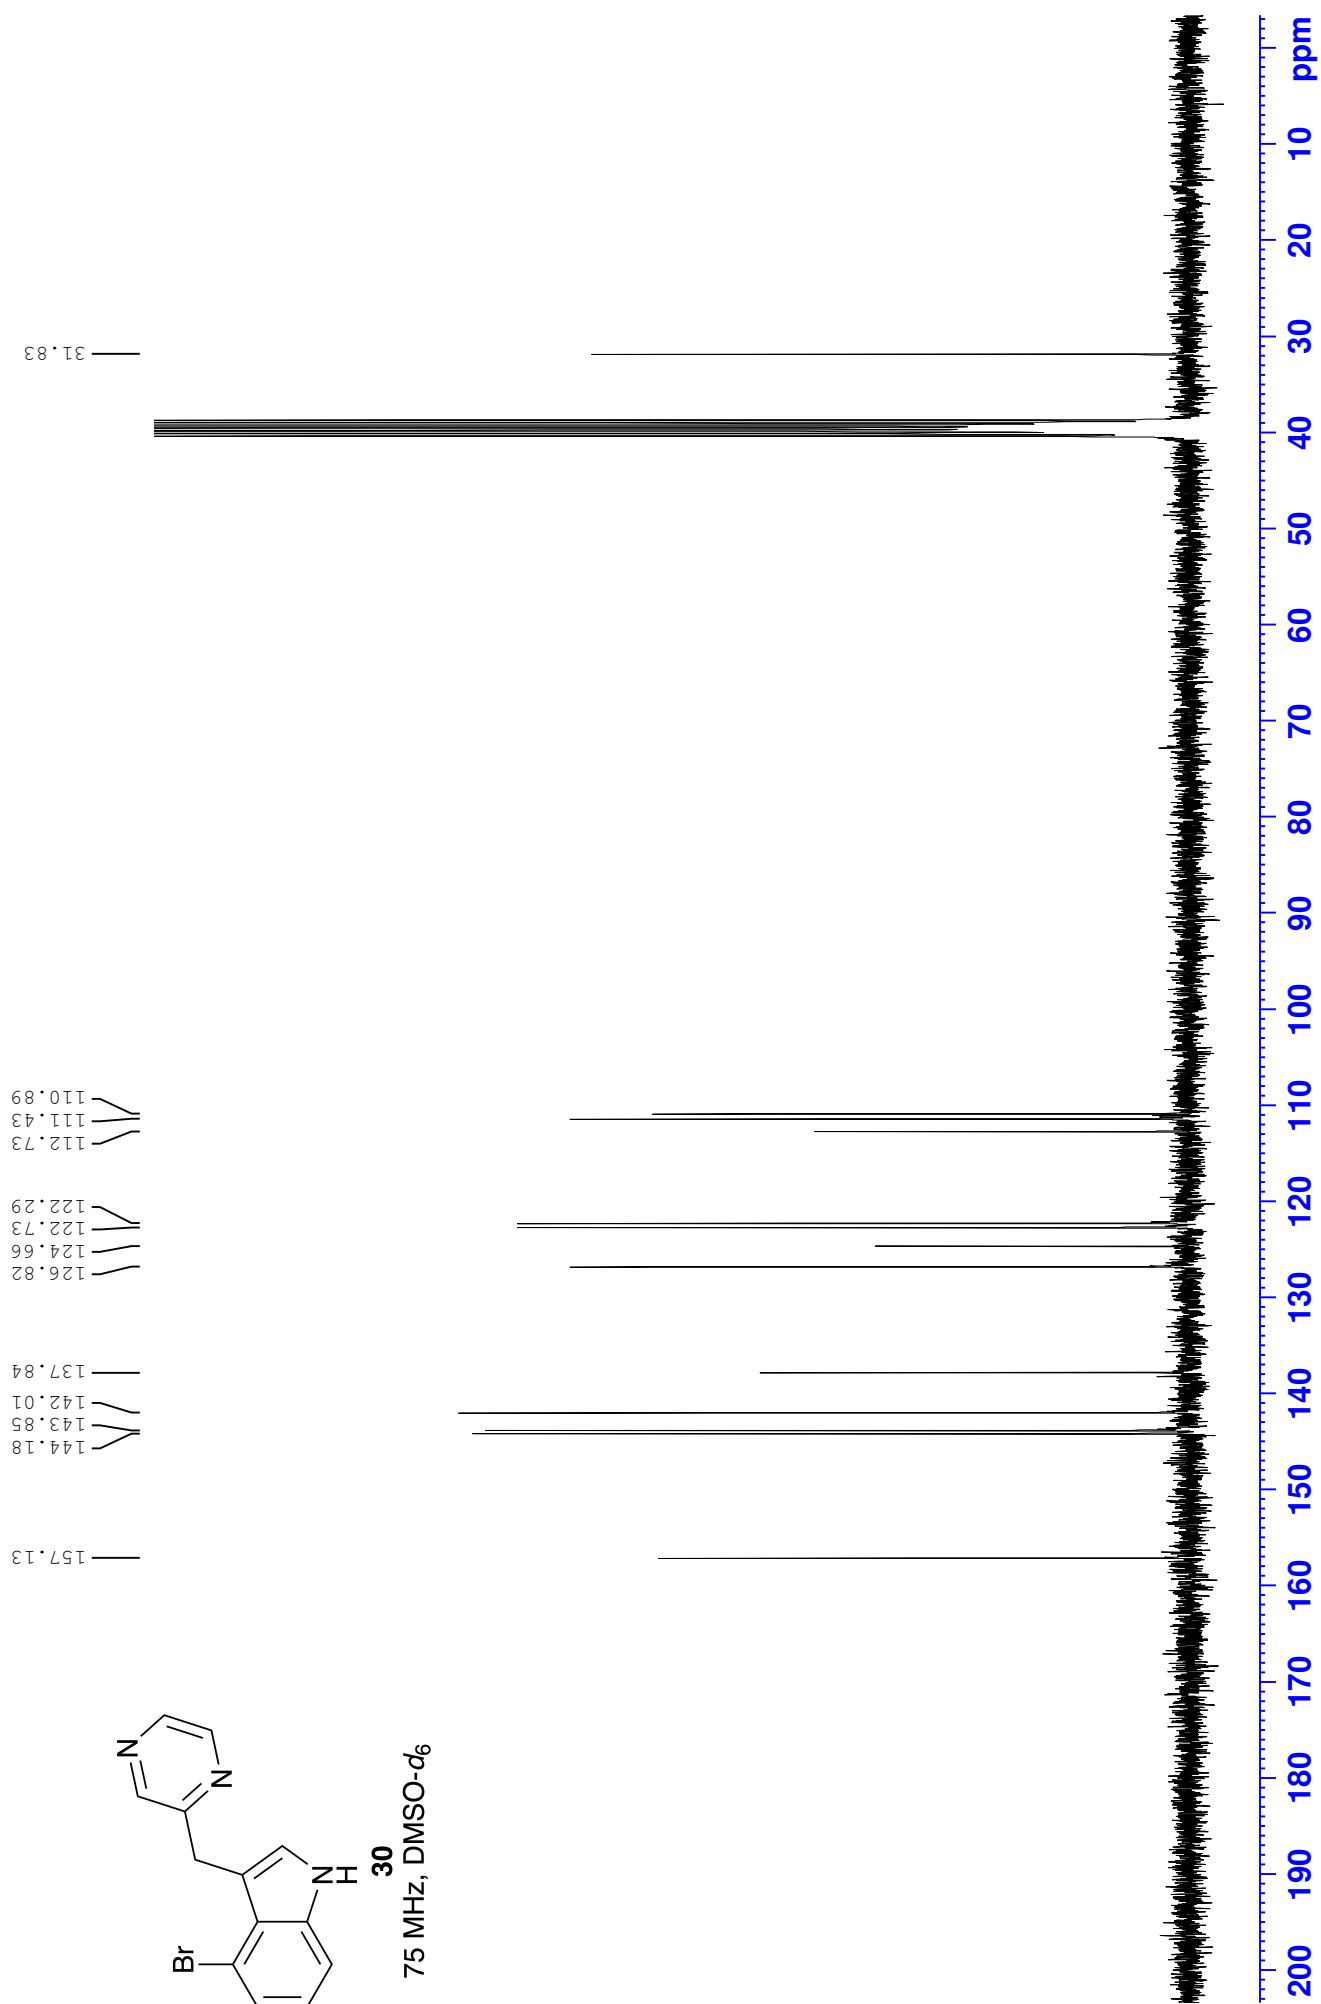

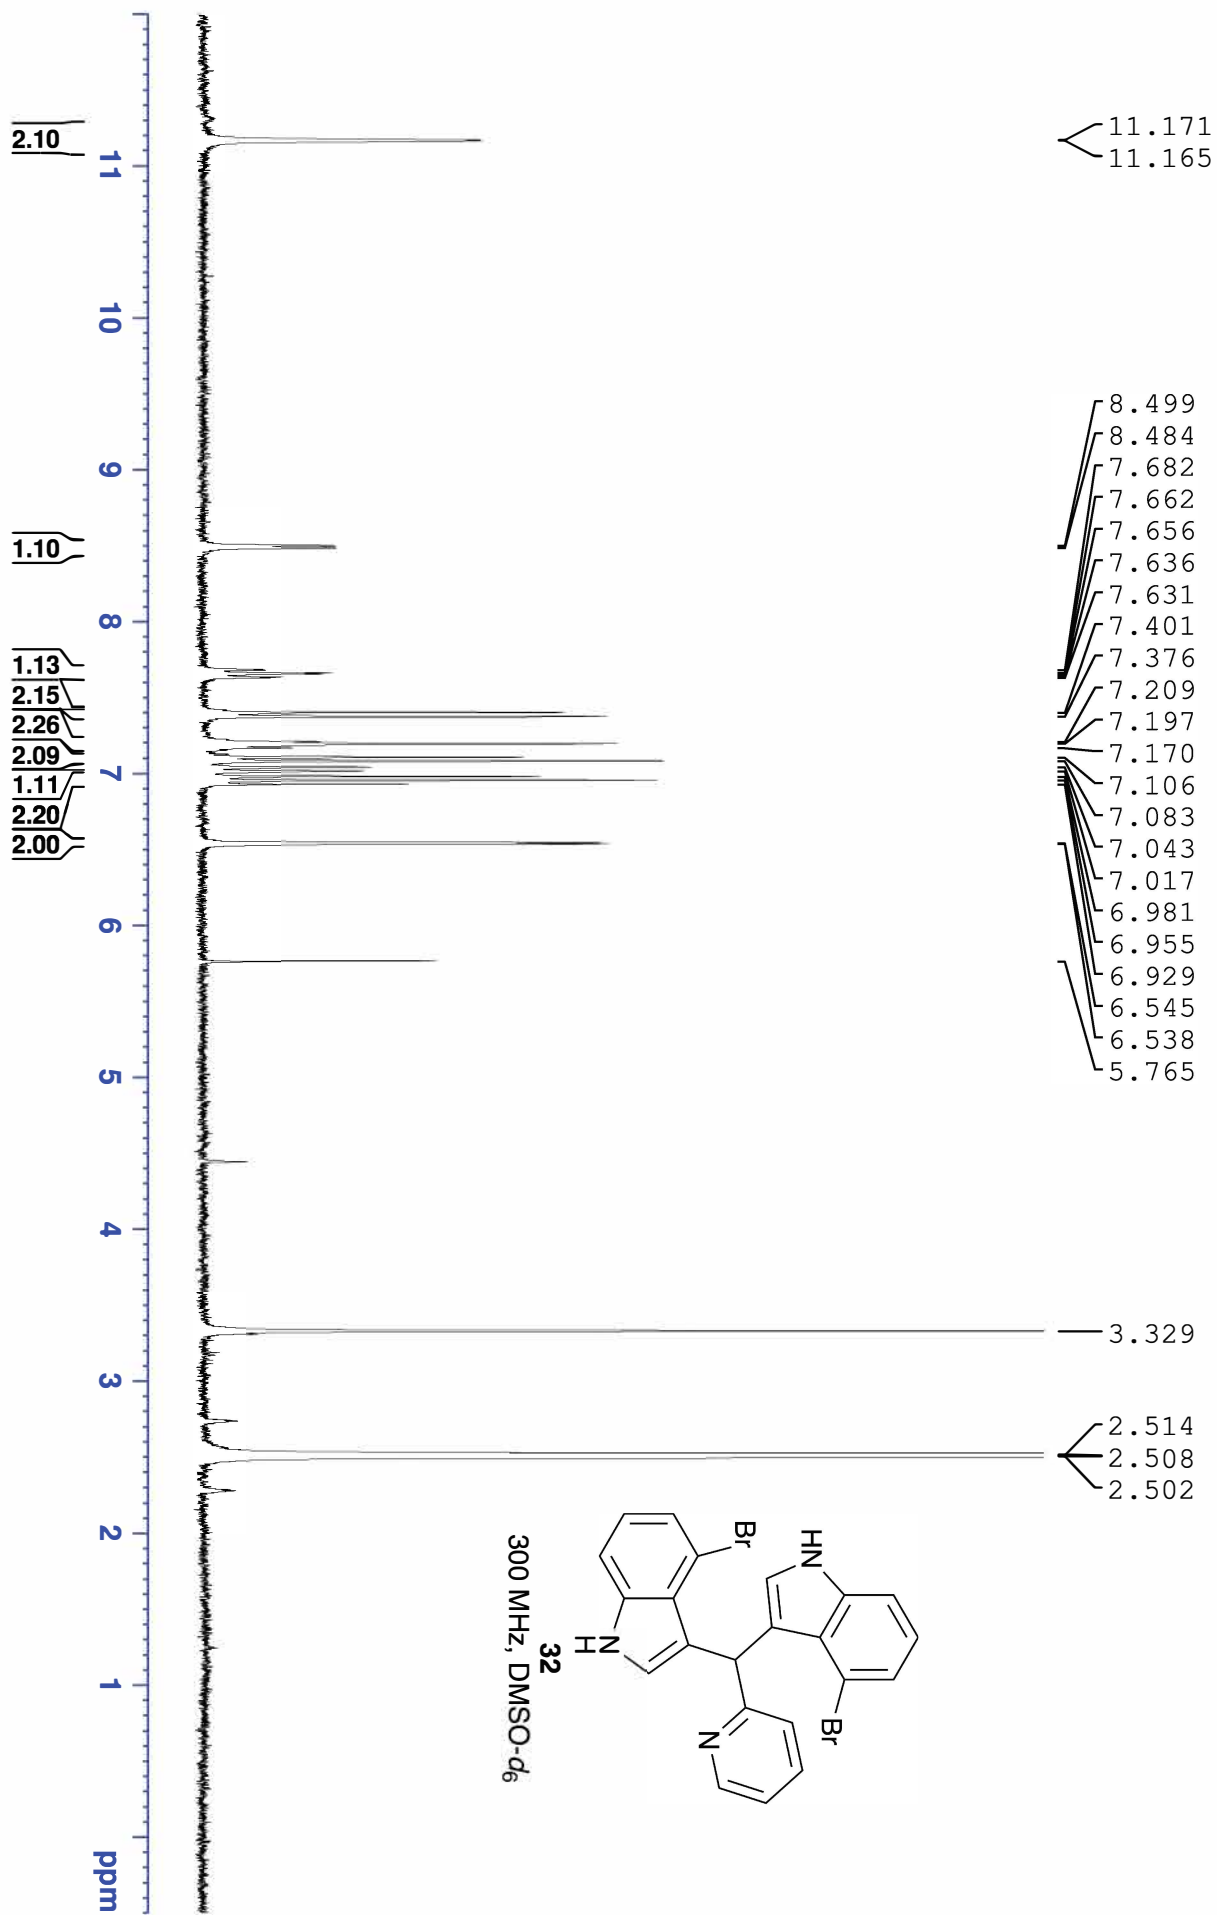



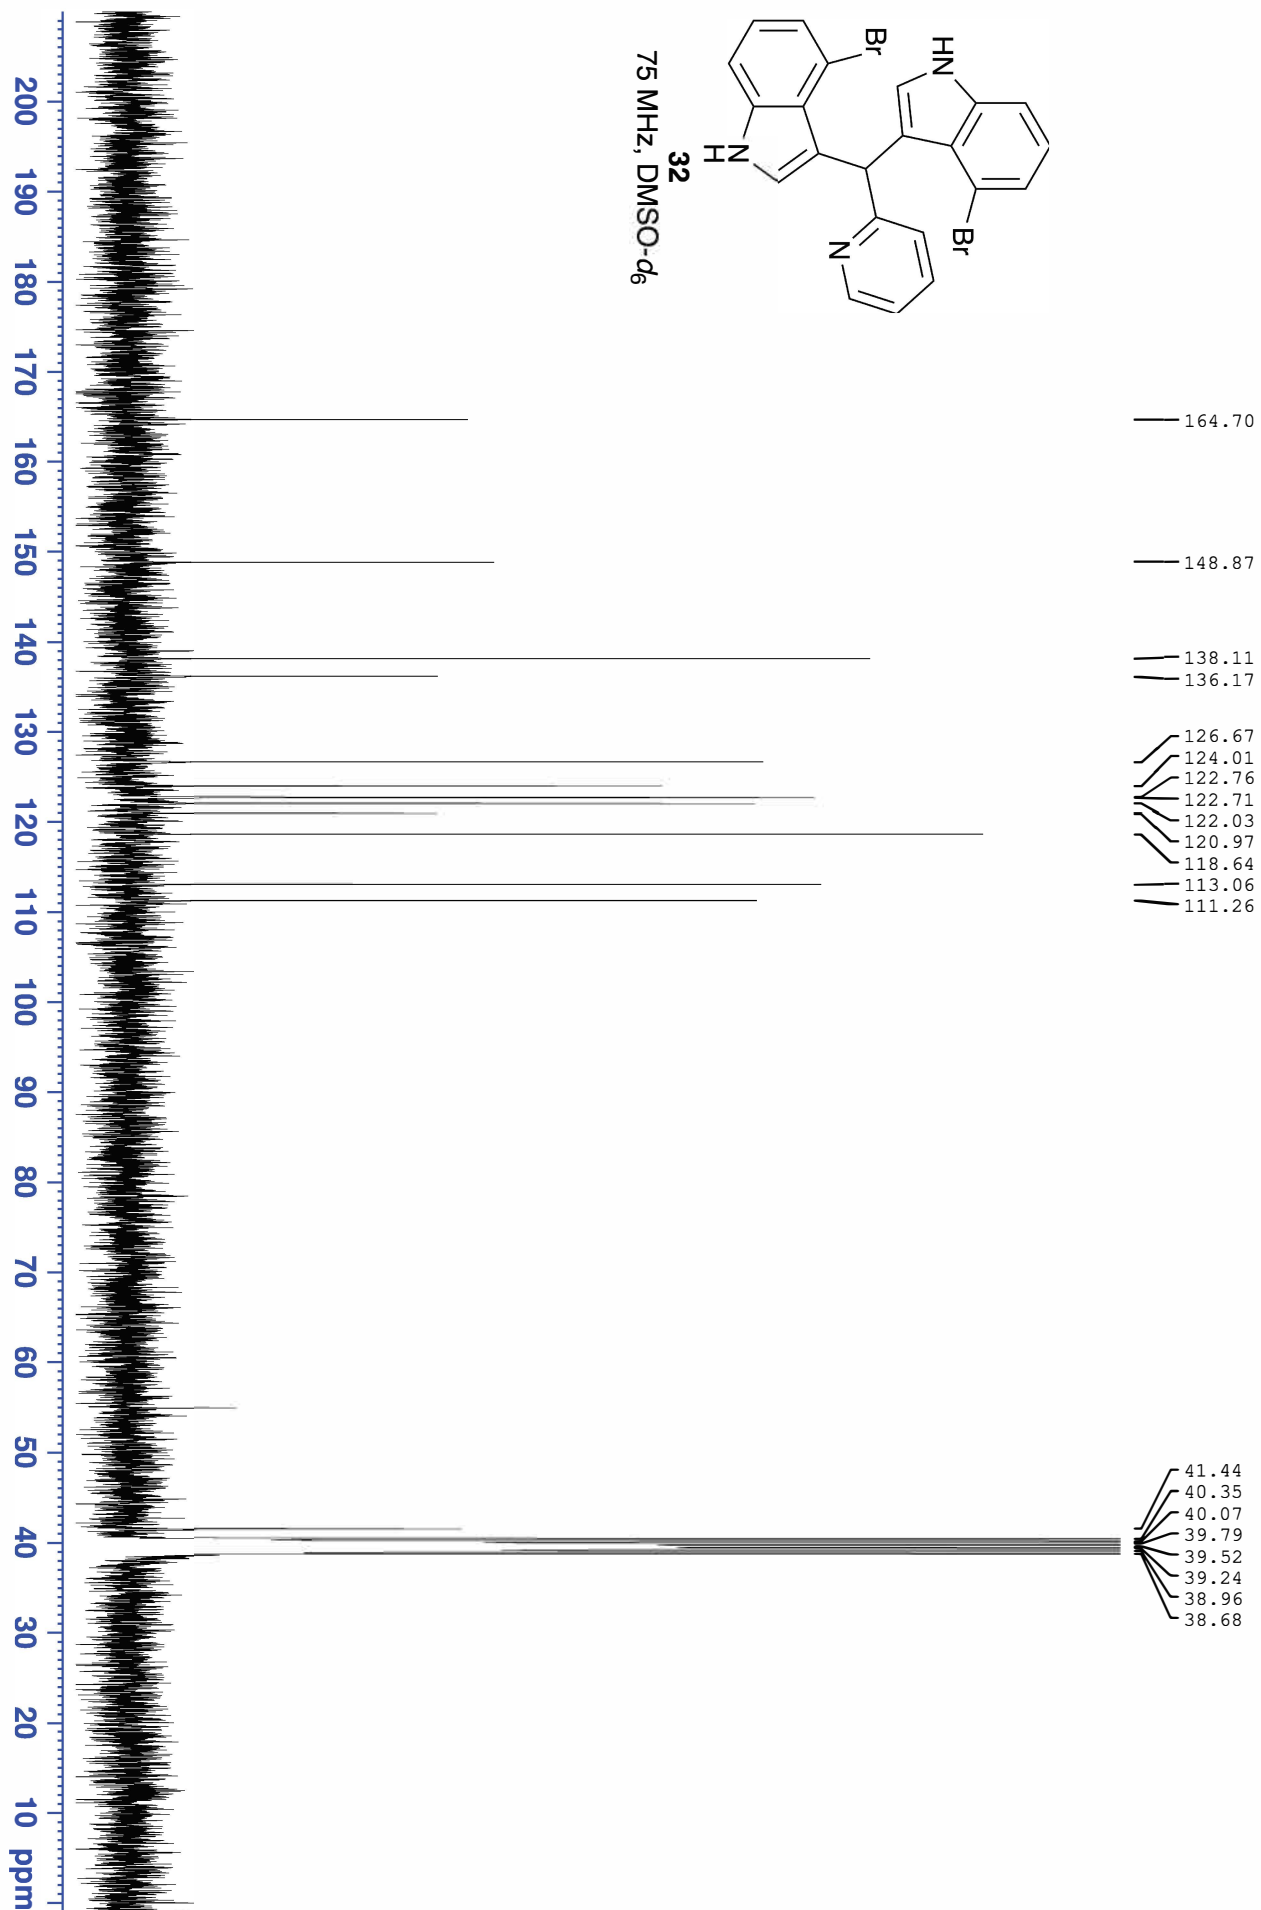

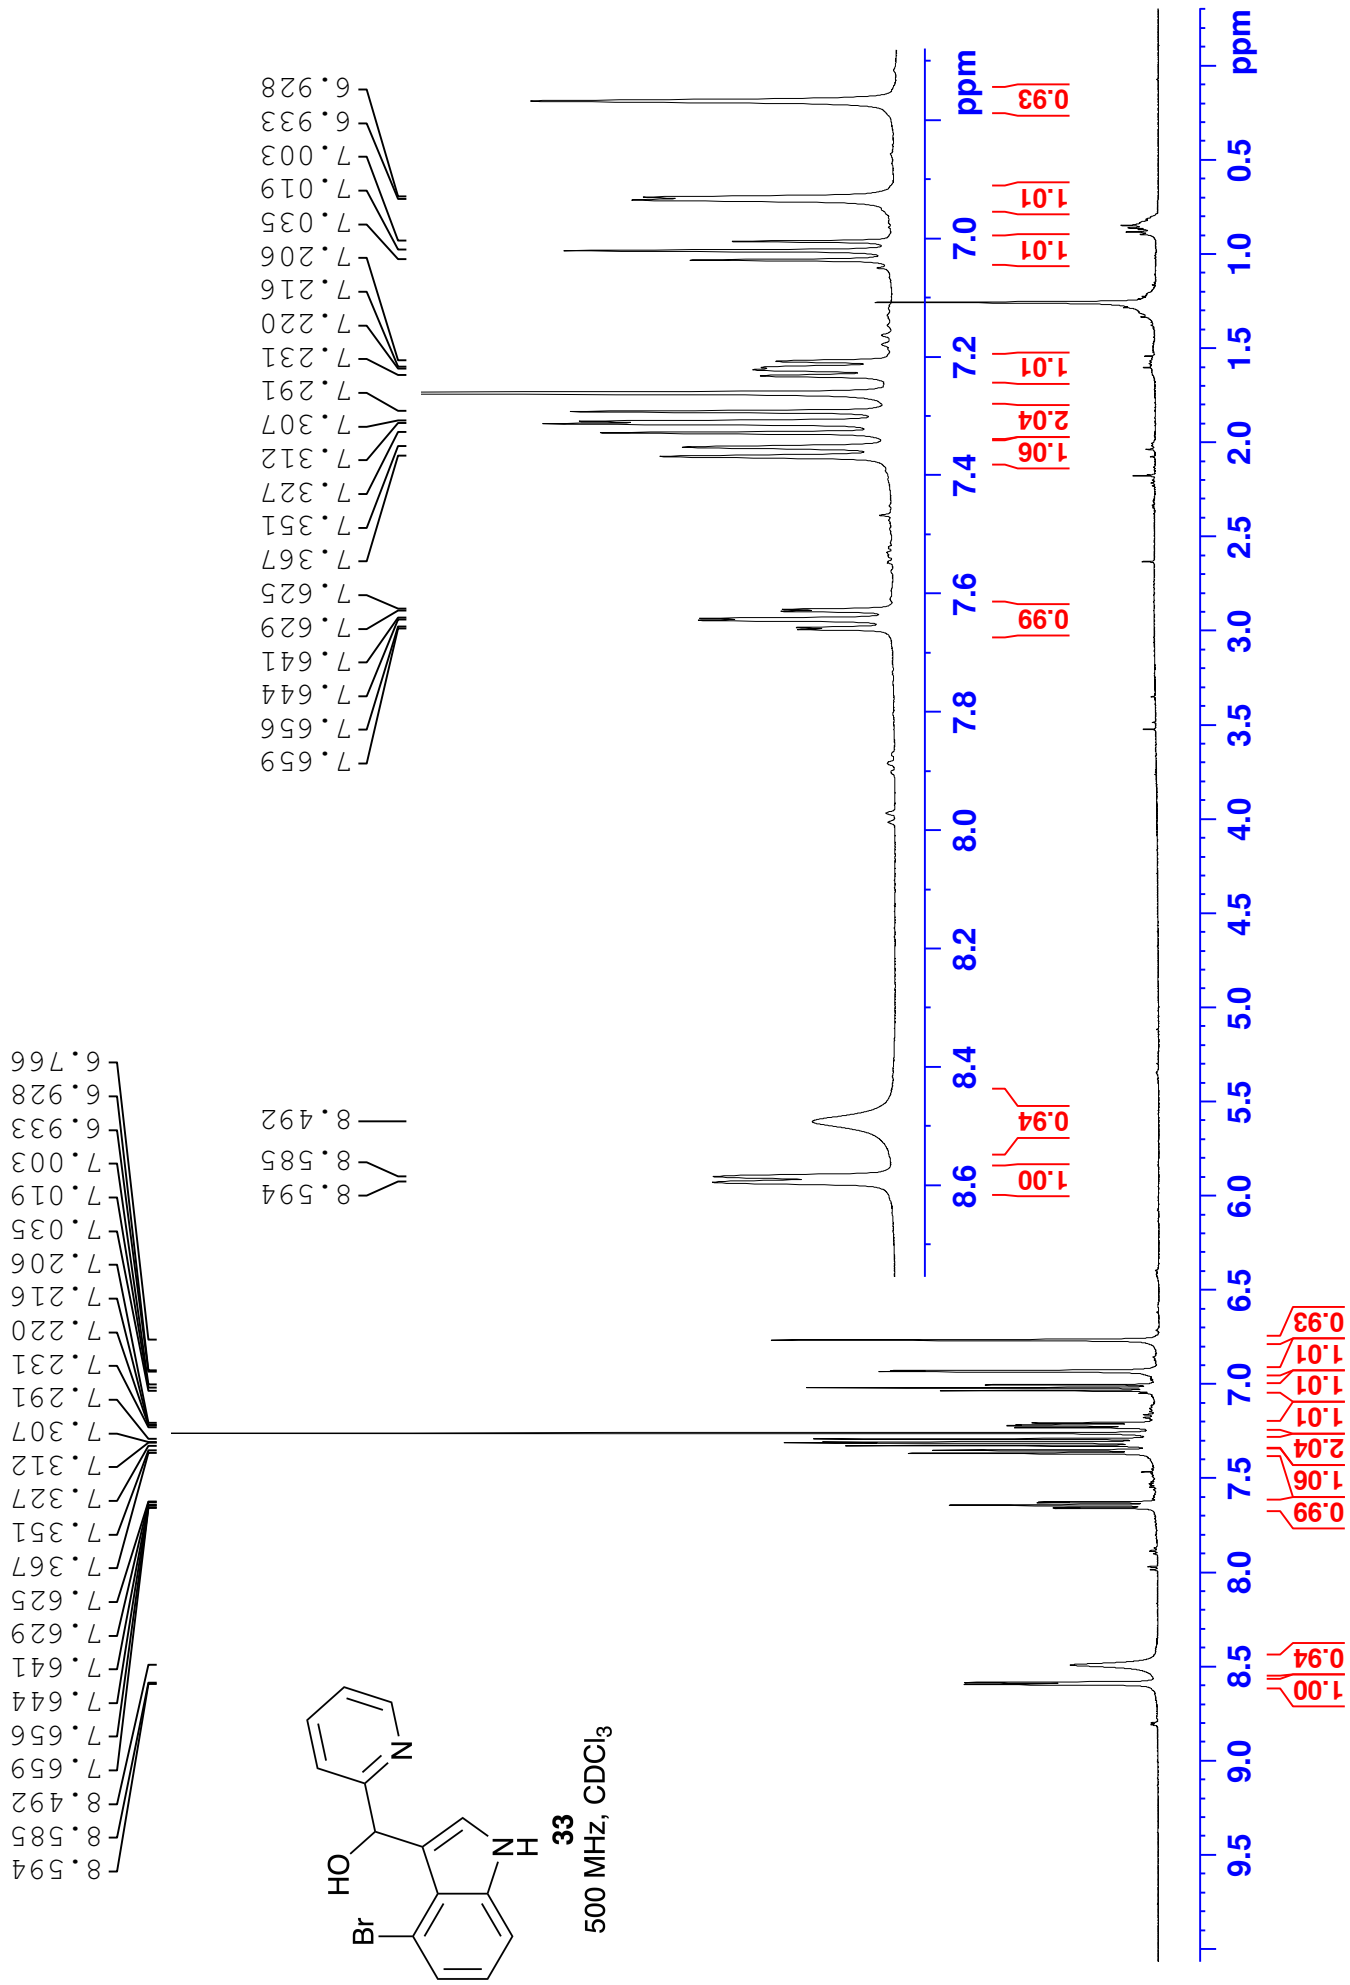

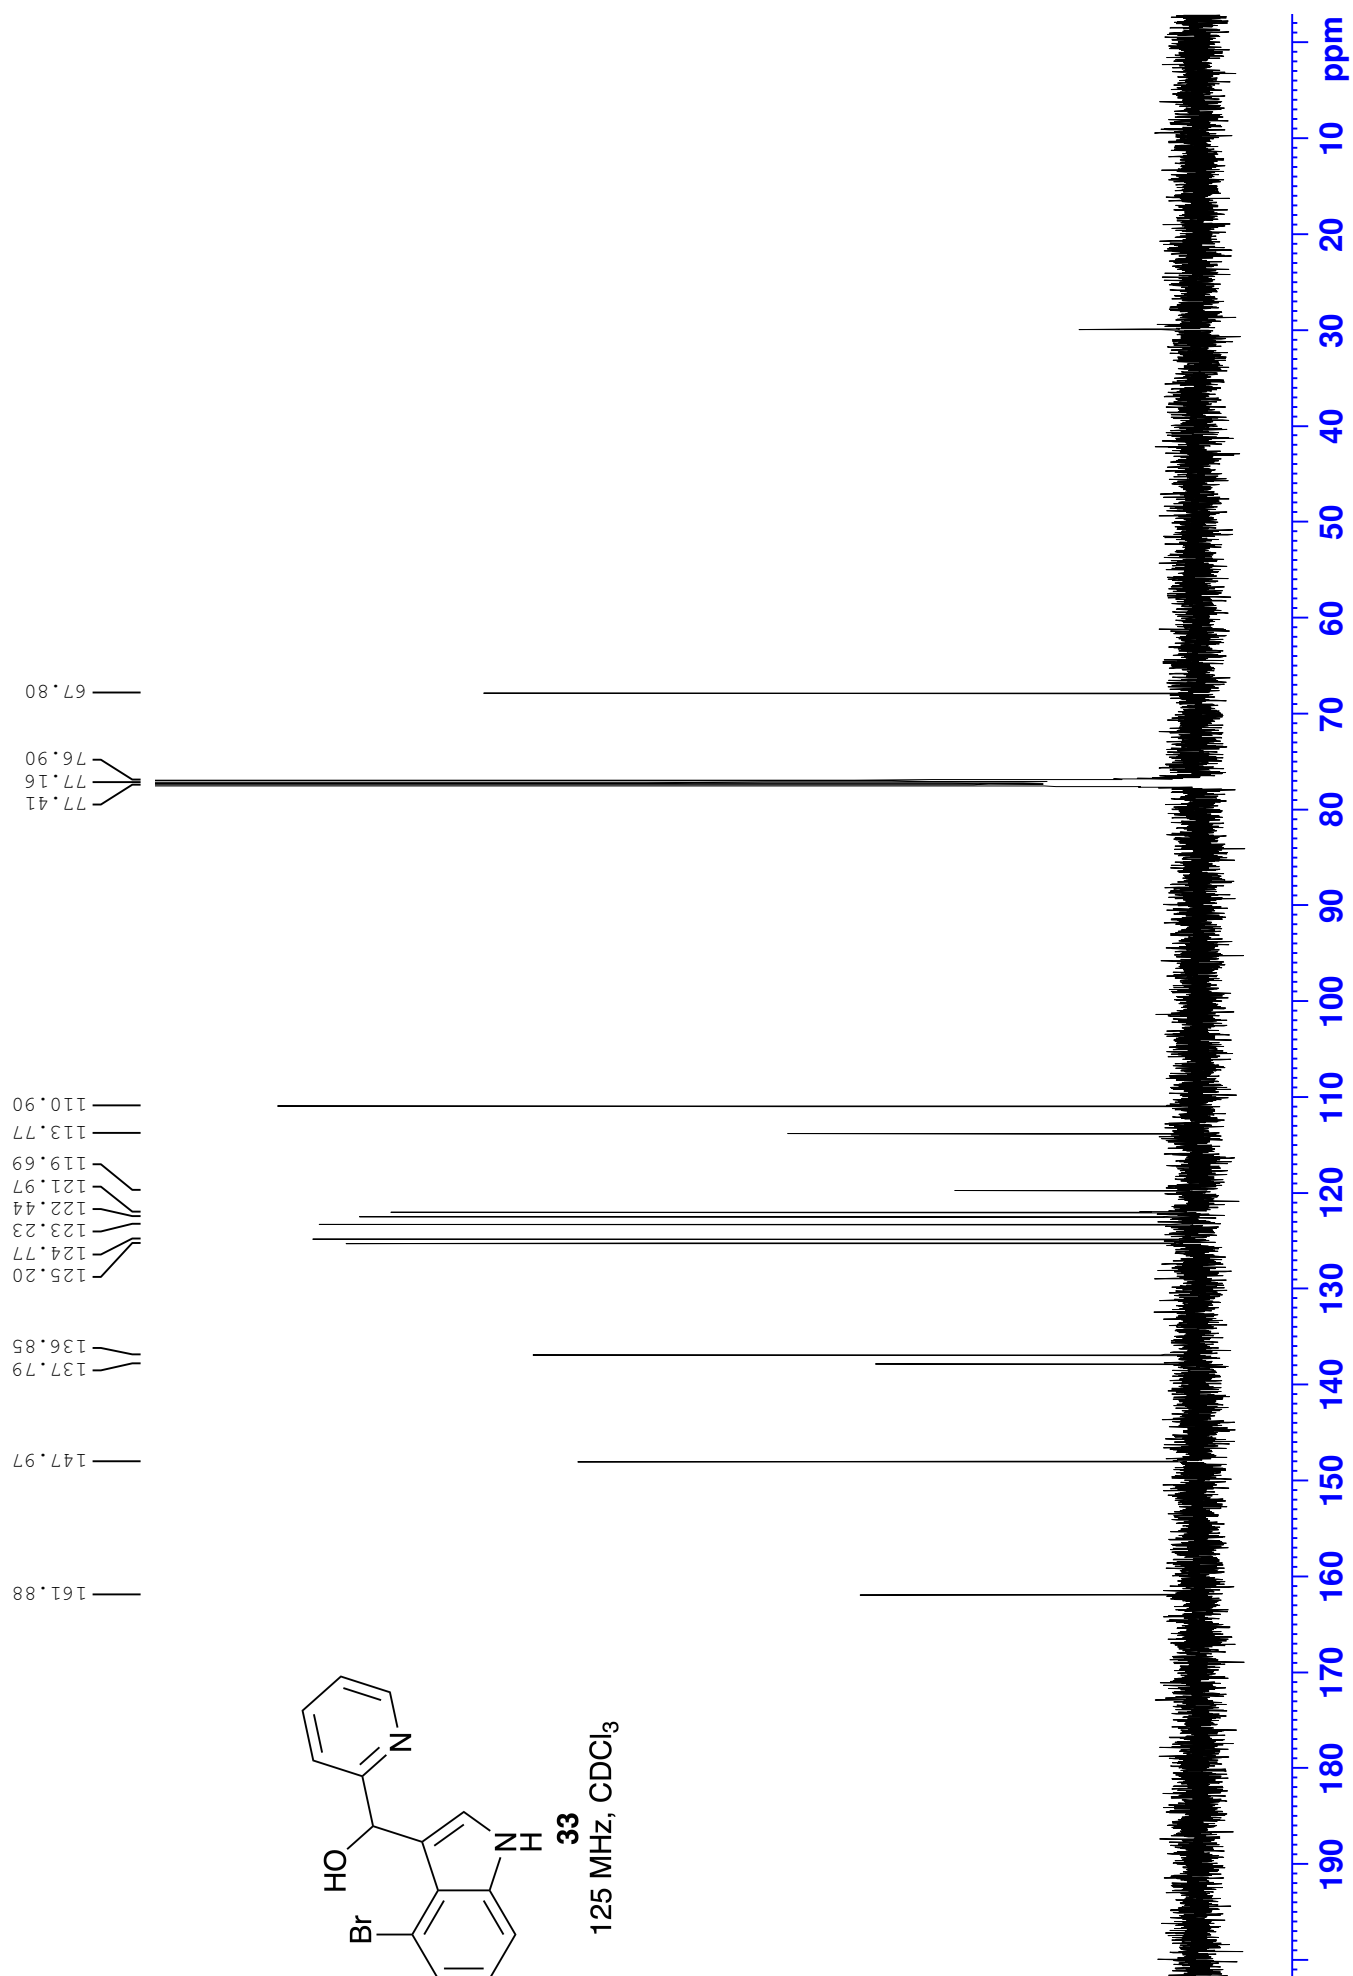

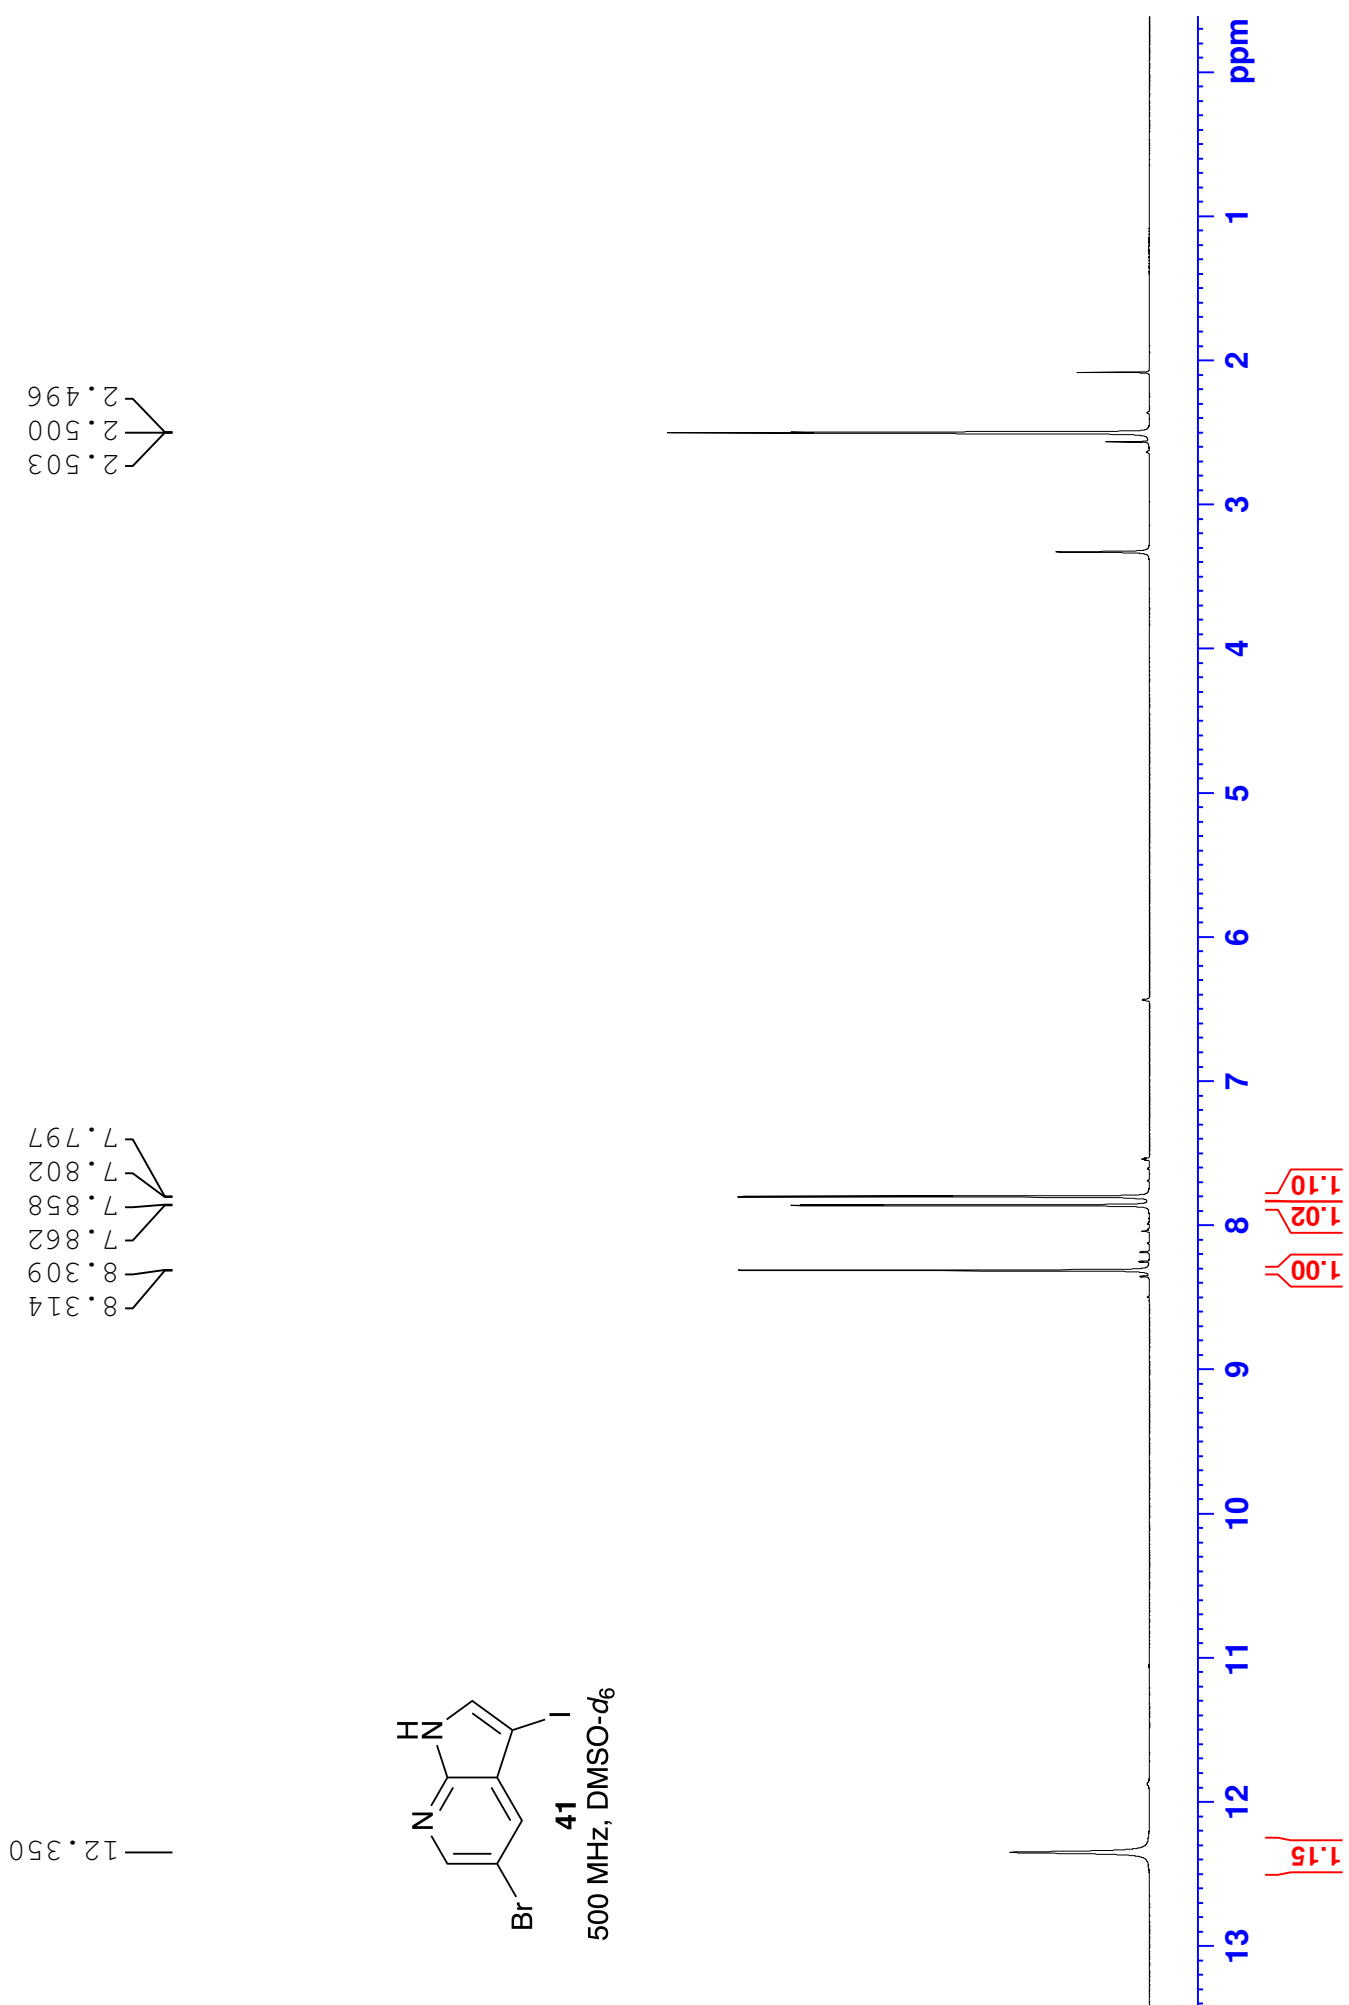

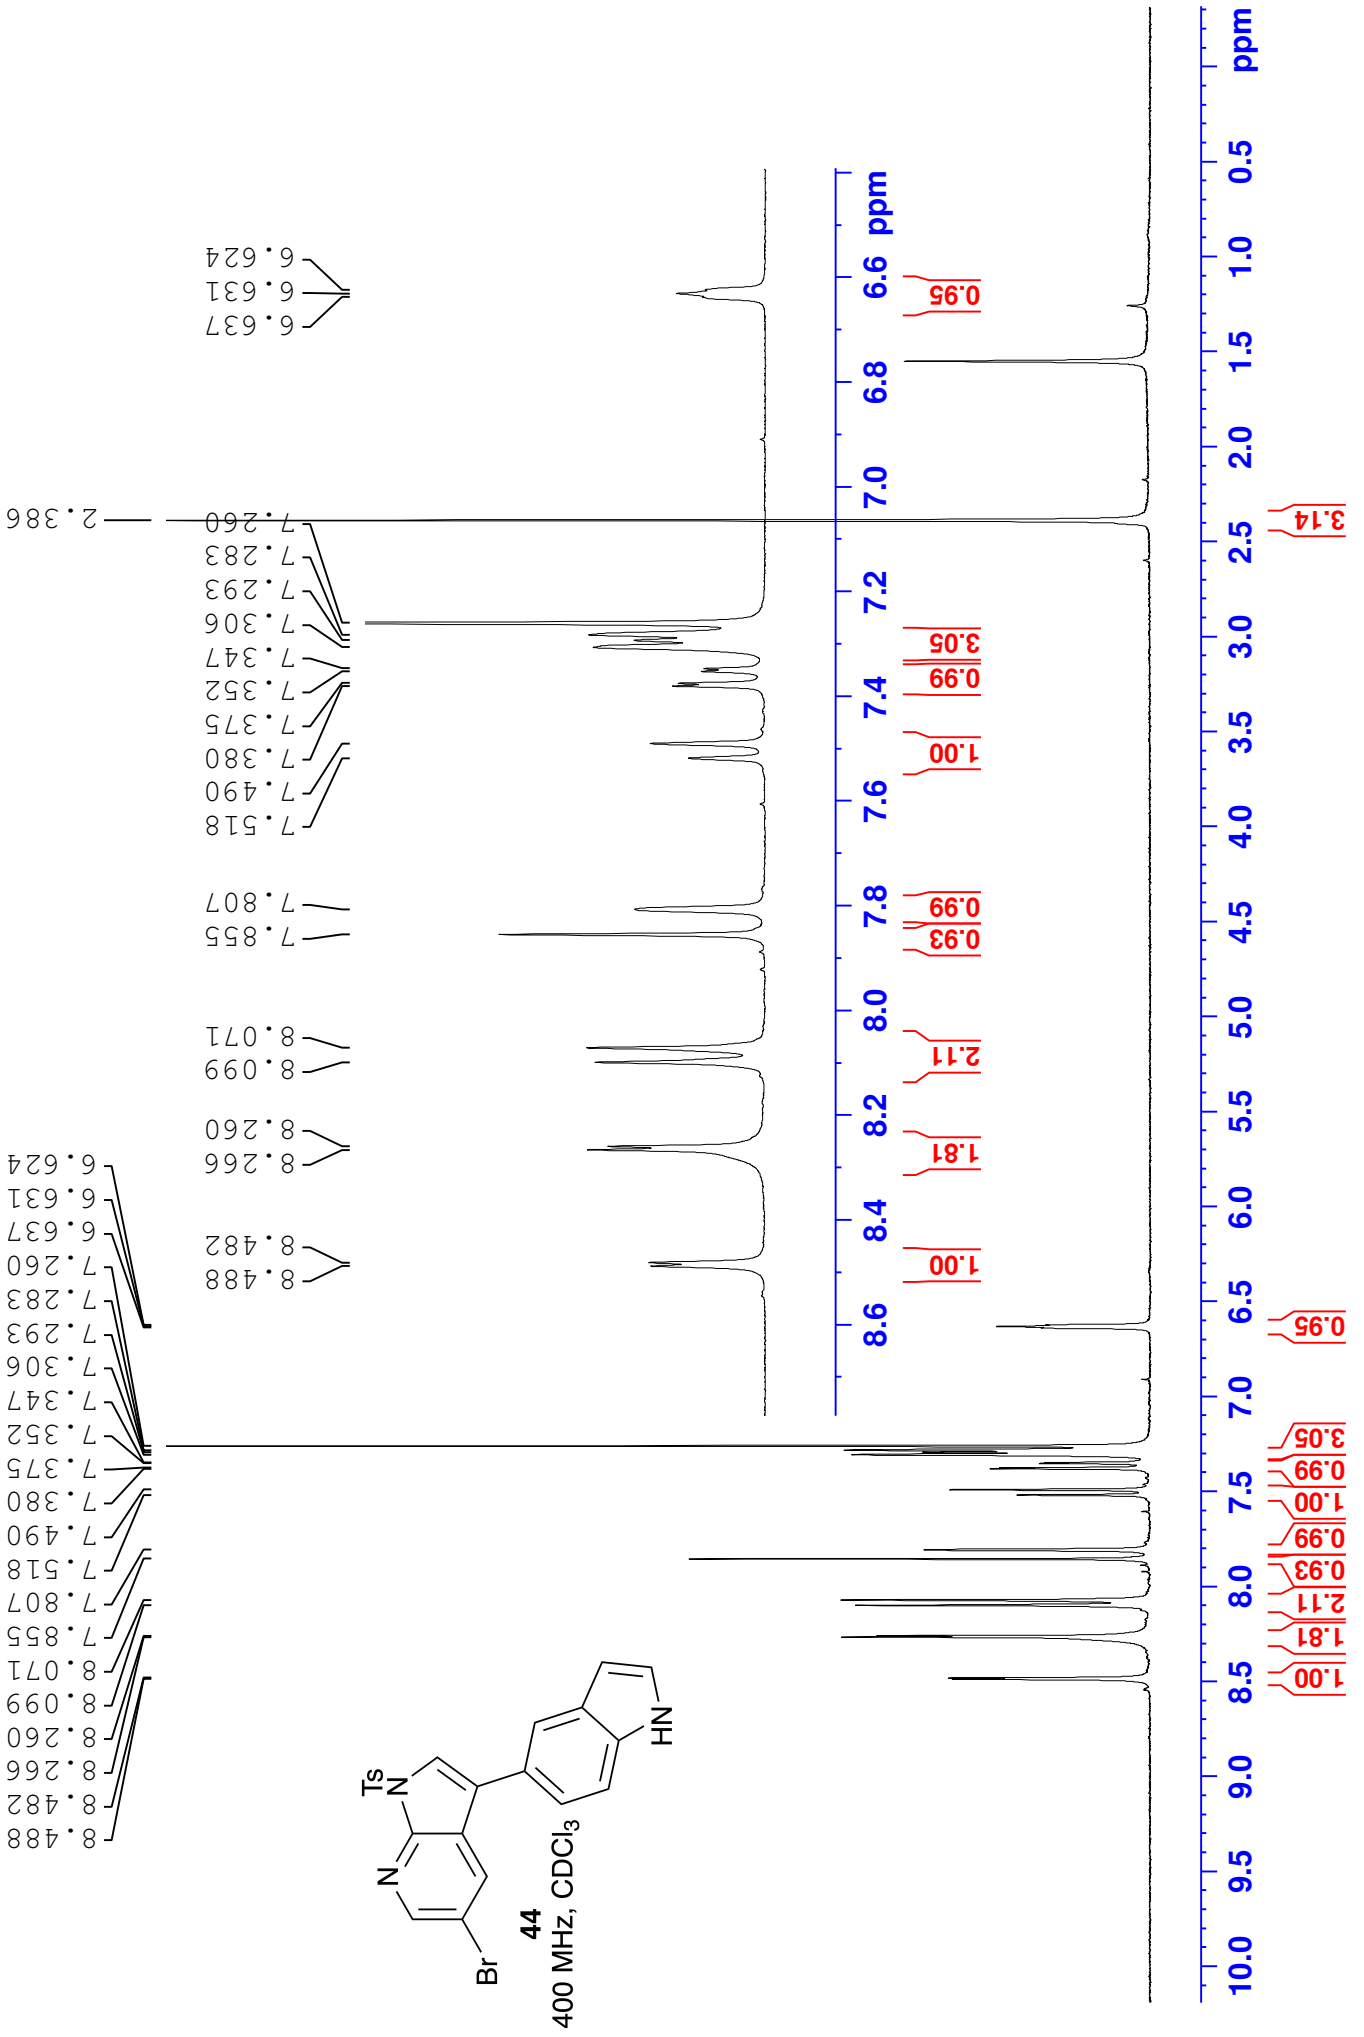

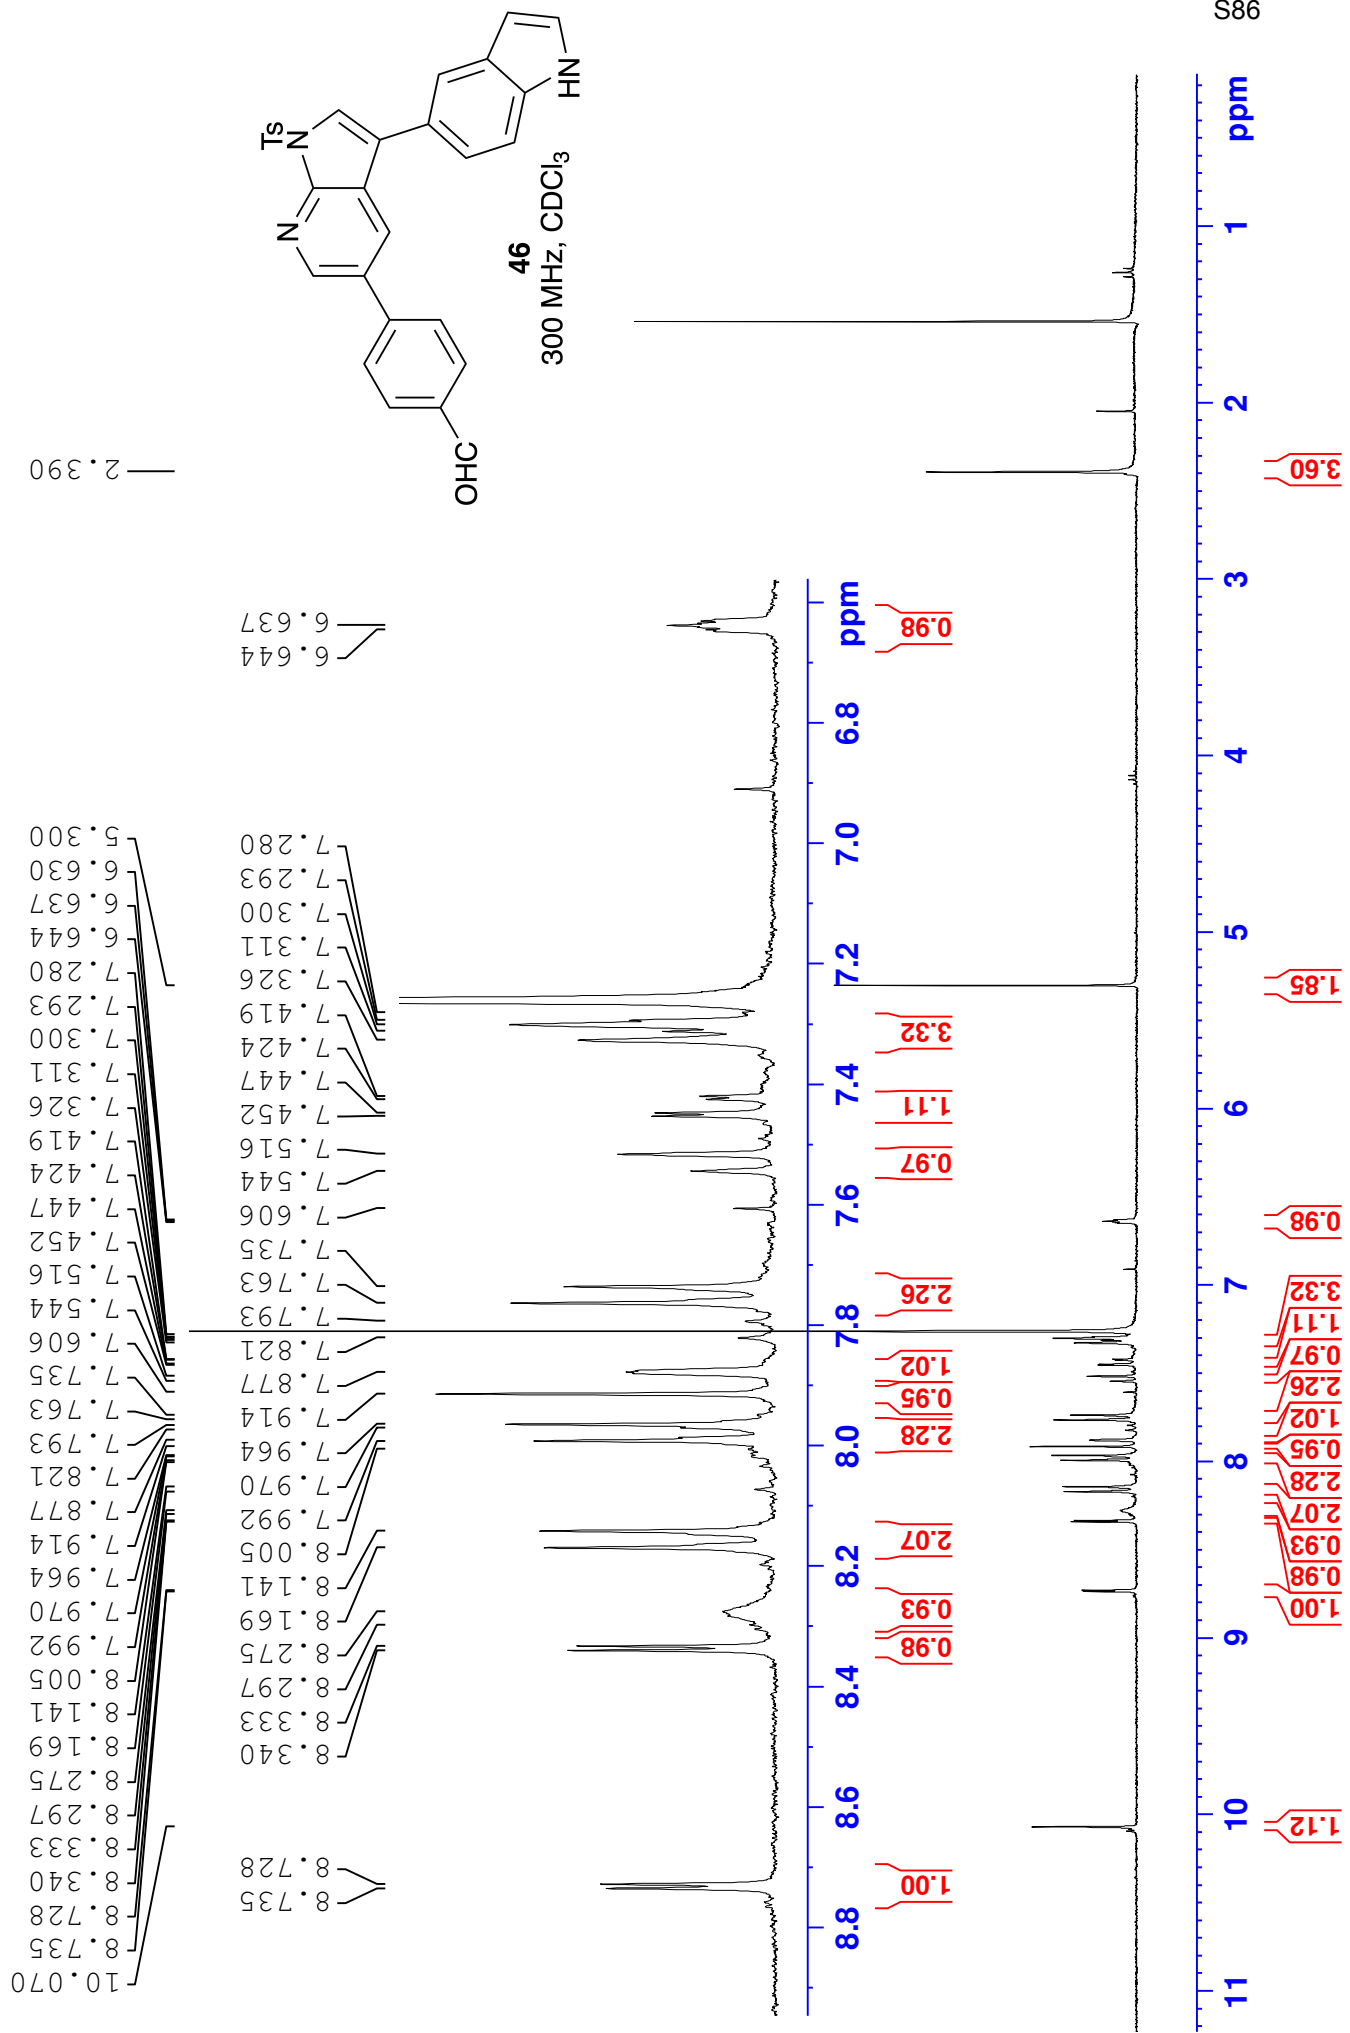

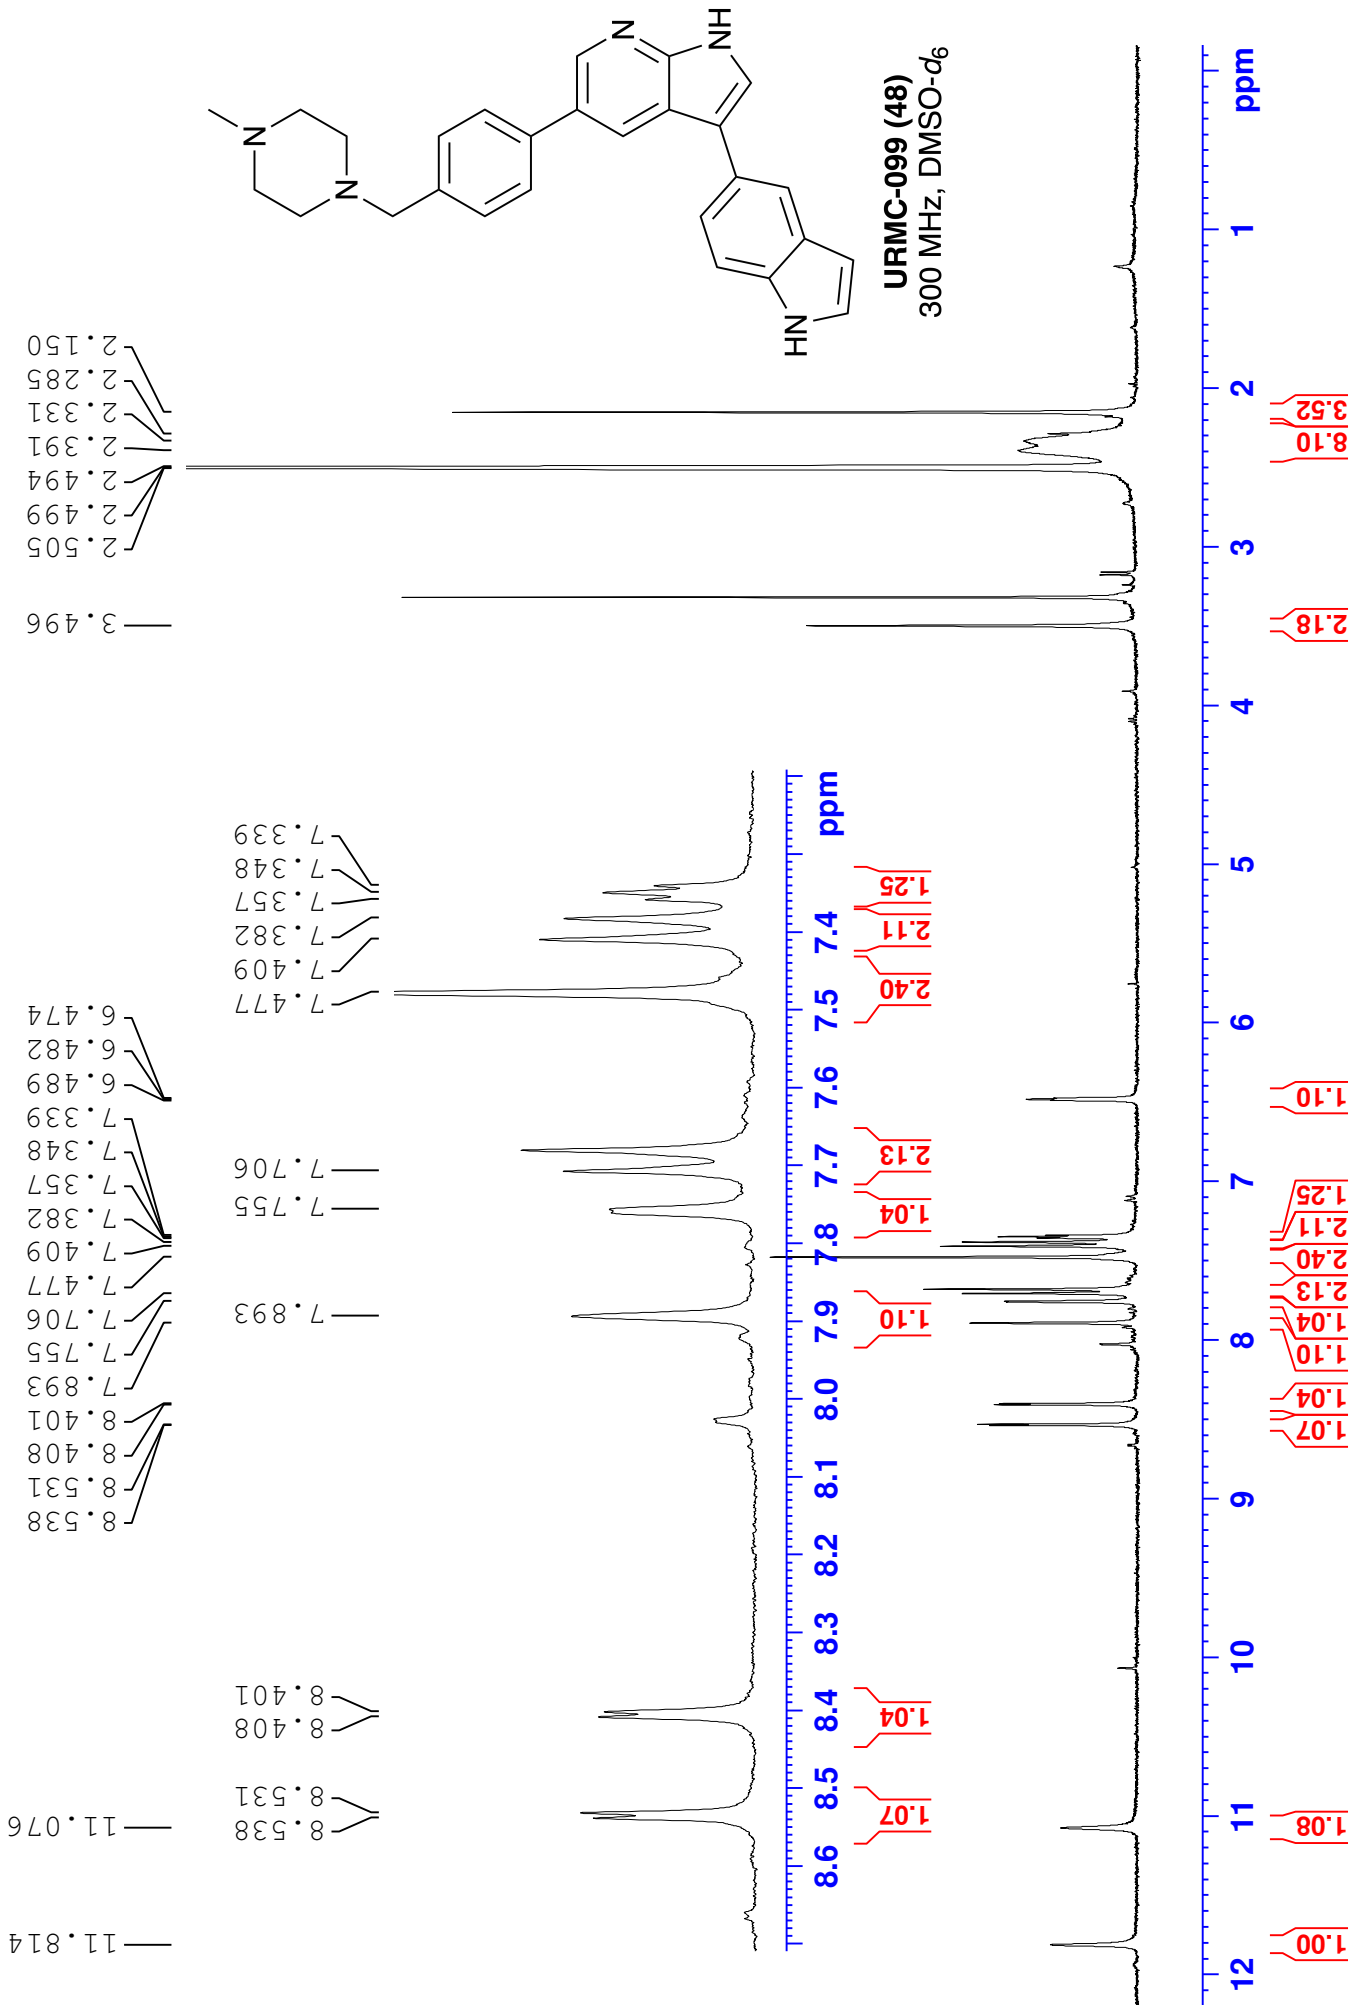

Supplement: d3ob01432k1.pdf [file d3ob01432k1.pdf]
